# Supplementary material for: Comparison of Alternative Splicing Landscapes Revealed by Long-Read Sequencing in Hepatocyte-Derived HepG2 and Huh7 Cultured Cells and Human Liver Tissue
Source: MDPI journal article supplement (doi:10.3390/biology12121494), 2023-12-06
Supplement: s1 [file s1]

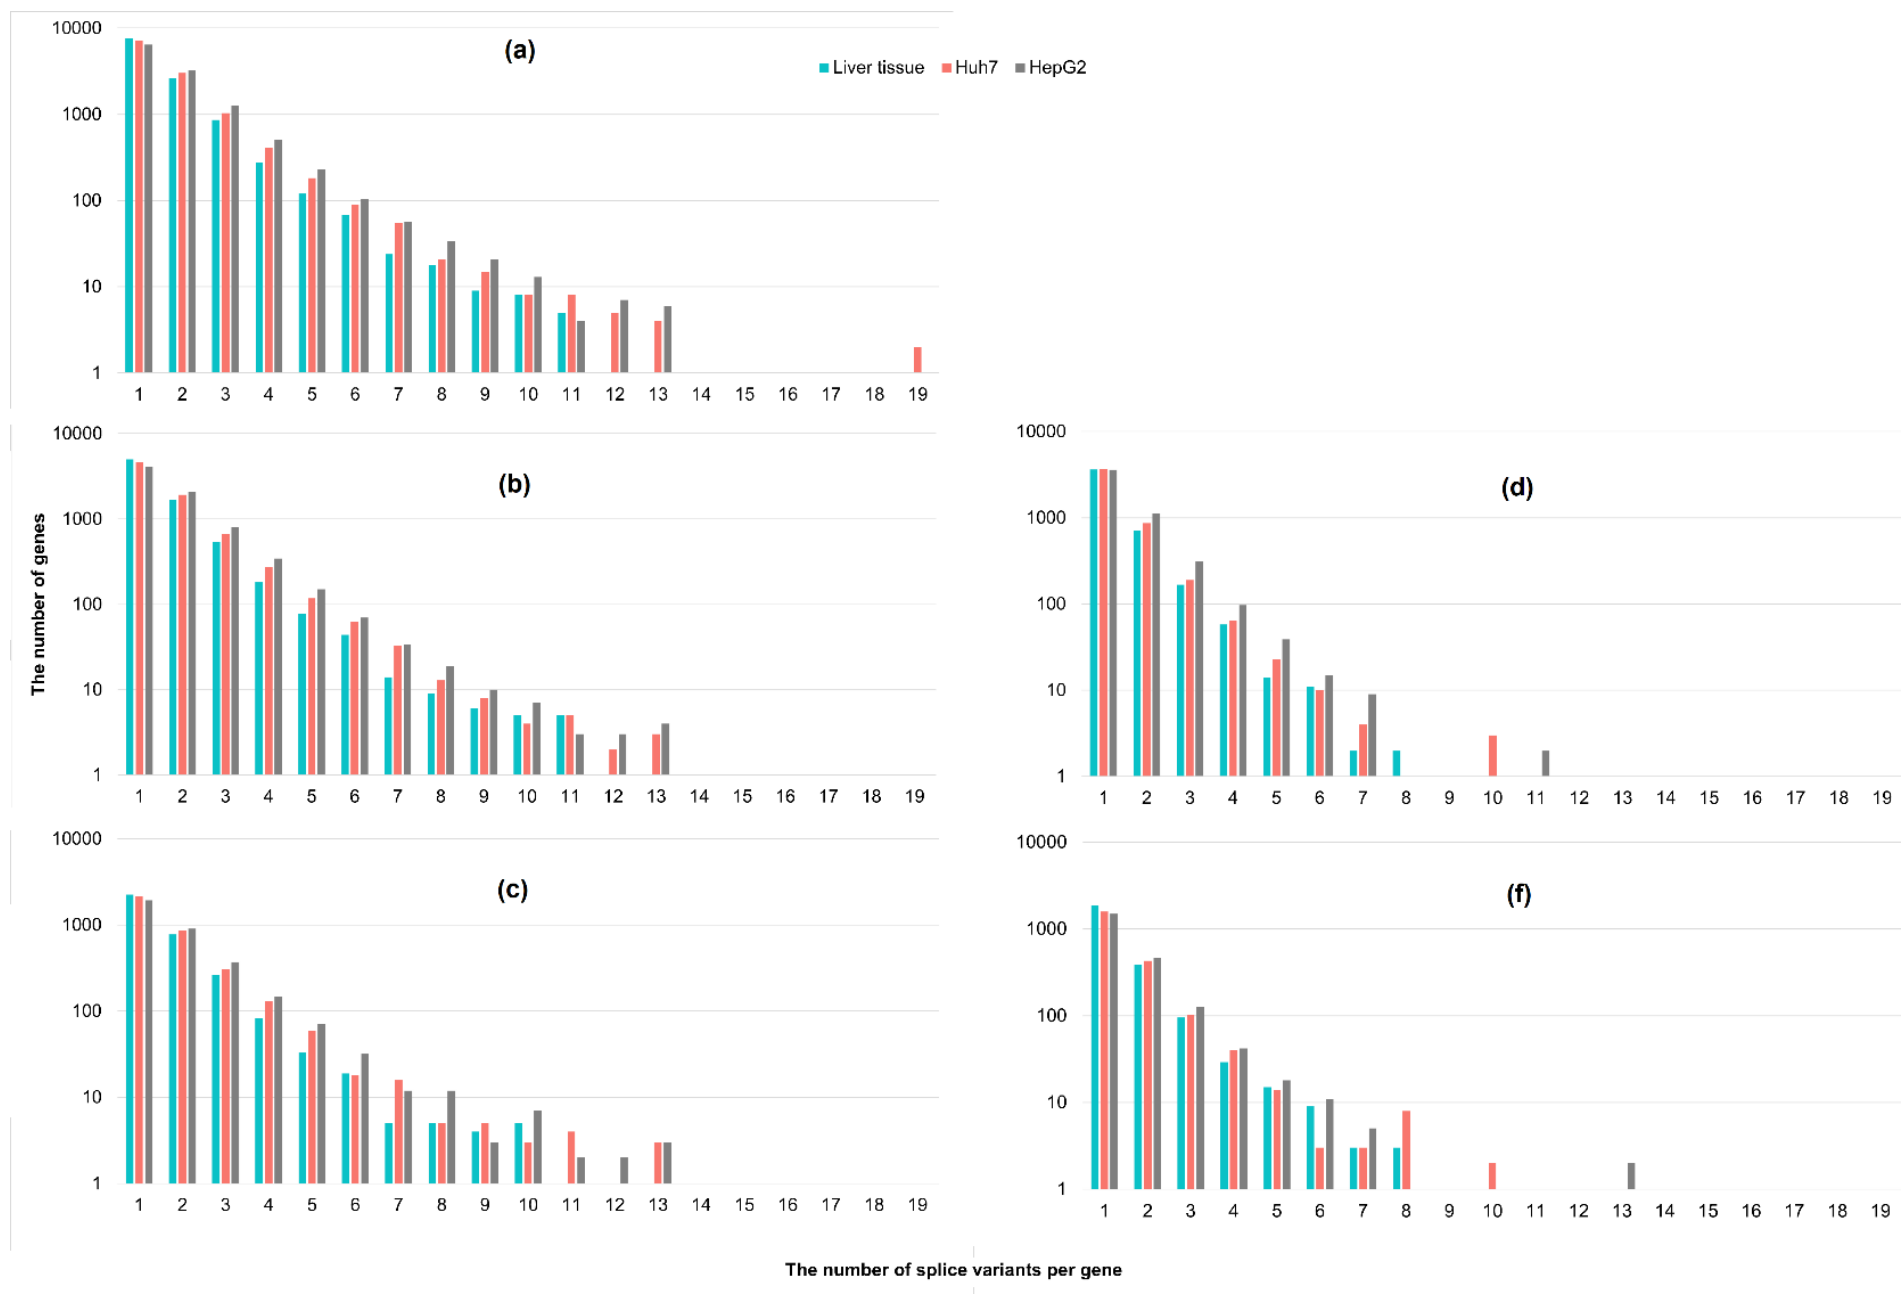

**Figure S1.** The distributions of the number of genes by the number of splice variant assigned to a gene. **(a)** all (14427) detected genes; **(b)** 9235 genes randomly selected out of 14427 detected genes; **(c)** 4236 genes randomly selected out of 14427 detected genes; **(d)** 9235 genes with phenotype-specific expression; **(e)** 4236 genes with phenotype-specific expression of one or two splice variants.
