# Supplementary material for: Comparison of Alternative Splicing Landscapes Revealed by Long-Read Sequencing in Hepatocyte-Derived HepG2 and Huh7 Cultured Cells and Human Liver Tissue
Source: Biology (Basel). 2023 Dec 6;12(12):1494. doi: 10.3390/biology12121494 (PMC10740679; doi:10.3390/biology12121494)
Supplement: Supplementary file 1 [file biology-12-01494-s001.zip › Table S1.xlsx]

## Sheet: Sheet1
Table S1. The sequencing output (the number of mapped reads, MR) for biosamples of human liver tissue, HepG2 and Huh7 cells.
Biosample Name	Biosample Type	MR (thousands)
HepG2_1	HepG2 cells	667.3
HepG2_2		927.5
HepG2_3		1665
HepG2_4		2203.4
HepG2_5		1779.2
Huh7_1	Huh7 cells	1139.1
Huh7_2		1567.8
Huh7_3		1620
Liver tissue_1	Human liver tissue	518.4
Liver tissue_2		573.3
Liver tissue_3		673.2
