# Supplementary material for: Comparison of Alternative Splicing Landscapes Revealed by Long-Read Sequencing in Hepatocyte-Derived HepG2 and Huh7 Cultured Cells and Human Liver Tissue
Source: Biology (Basel). 2023 Dec 6;12(12):1494. doi: 10.3390/biology12121494 (PMC10740679; doi:10.3390/biology12121494)
Supplement: Supplementary file 1 [file biology-12-01494-s001.zip › Table S2.xlsx]

## Sheet: Sheet 1
Table S2. The abundance of splice variants of protein-coding genes in TPM values for each biosample tested.
ENSG	ENST	Liver_tissue_3	Liver_tissue_2	Liver_tissue_1	Huh7_3	Huh7_2	Huh7_1	HepG2_5	HepG2_4	HepG2_3	HepG2_2	HepG2_1
ENSG00000187634.13	ENST00000616016.5	0.905274	0	0	0	0	0	0	0	0	0	0
ENSG00000187634.13	ENST00000342066.8	0	0	0	2.09361	0	0	0	0	0	0	0
ENSG00000187634.13	ENST00000341065.8	0	0	0	6.42706	10.2475	9.41622	0	0	0	0	0
ENSG00000188976.11	ENST00000327044.7	0	0.610393	1.92872	3.45022	17.3798	7.14548	28.0548	19.9829	21.5983	26.9025	20.427
ENSG00000187961.15	ENST00000338591.8	0	0	0	0.957169	0	0.537333	2.98528	1.99884	3.32174	6.62306	1.4668
ENSG00000187583.11	ENST00000379410.8	0	0	0	0	0	0	1.18208	0	0.437504	0.806931	1.54882
ENSG00000187642.10	ENST00000694917.1	0	0	0	0	0	0	0	0	0.570157	0	0
ENSG00000188290.11	ENST00000304952.11	0	0	0	41.1422	37.9968	75.573	43.5212	13.8007	30.2205	0	13.5261
ENSG00000188290.11	ENST00000484667.2	0	0	0	0	0	25.0619	0	0	0	0	0
ENSG00000187608.10	ENST00000624697.4	0	0	0	5.35453	0	0	0	0	0	0	0
ENSG00000187608.10	ENST00000649529.1	27.709	67.1069	18.7007	33.6187	49.0711	173.095	120.45	115.84	92.4125	51.7423	64.2621
ENSG00000188157.15	ENST00000379370.7	0.339586	0	0.176803	2.21432	2.33894	0.26213	10.4742	13.3105	4.39695	9.5119	7.50947
ENSG00000131591.18	ENST00000379339.5	0	0	0	0	4.60441	0	0	0	0	0	0
ENSG00000131591.18	ENST00000421241.7	0	0	0	6.17684	0	0	0	5.08288	0	2.27108	1.4319
ENSG00000186827.11	ENST00000379236.4	0	0	0	0	0	0	0	0	0	0	1.37209
ENSG00000078808.19	ENST00000660930.1	0	0	2.46335	0	0	3.72277	0	0	3.73662	0	0
ENSG00000078808.19	ENST00000360001.12	26.9754	19.796	24.2208	84.0305	61.9855	52.2645	87.0087	81.0793	97.136	91.3499	70.8345
ENSG00000078808.19	ENST00000263741.12	0	0	0	0	0	0	5.82302	4.63072	0	3.95403	0
ENSG00000176022.7	ENST00000379198.5	0	0.898396	2.20792	9.96001	8.26128	10.917	7.24852	10.794	8.51711	15.7124	17.5019
ENSG00000184163.3	ENST00000330388.2	0	0	0	0	2.05707	1.58264	0	1.46056	0	0	0
ENSG00000160087.21	ENST00000349431.11	3.05494	4.18686	1.20269	11.5463	20.0987	18.6336	19.5787	22.6932	11.3117	17.03	13.5258
ENSG00000160087.21	ENST00000347370.6	0	0	0	0	0	0	0	0	9.1478	0	0
ENSG00000160087.21	ENST00000400929.6	0	0	0	8.33313	0	0	0	0	0	0	0
ENSG00000162572.21	ENST00000325425.12	0	0.629986	0.331777	0	0	0	0.474614	1.41908	1.58095	0.971969	0.466399
ENSG00000131584.19	ENST00000354700.10	0	0.64794	0.682454	5.00847	4.60277	2.57688	4.88187	5.54	8.67254	5.66479	4.99038
ENSG00000169972.12	ENST00000379031.10	1.52368	2.27807	1.59962	29.6244	28.959	31.3705	18.636	18.6782	25.4082	16.4044	19.2487
ENSG00000127054.22	ENST00000540437.5	0	1.27666	0	0	4.71034	0	1.66366	6.92892	0	0	10.074
ENSG00000127054.22	ENST00000545578.5	0	0	1.54123	8.35222	6.4104	0	12.4394	9.12447	11.9773	14.0373	10.2112
ENSG00000127054.22	ENST00000620829.4	2.8323	1.69342	0	0	5.27171	7.24209	0	8.38612	1.27717	0	0
ENSG00000127054.22	ENST00000435064.6	0	0	0	0	0	0	5.4693	0	6.22429	6.13522	0
ENSG00000127054.22	ENST00000421495.6	0	0	1.07054	0	0	6.32877	0	0	0.987831	0	0
ENSG00000127054.22	ENST00000429572.5	0	0	0	5.18998	3.37377	0	2.69781	5.47156	0	3.18053	2.65111
ENSG00000224051.7	ENST00000343938.9	6.45019	3.61622	4.65526	5.8369	4.95118	9.15356	9.0812	11.8087	9.41104	11.1585	13.6849
ENSG00000224051.7	ENST00000488011.1	0	0	0	0	0	0	0	2.15254	0	0	0
ENSG00000169962.5	ENST00000339381.6	0	0.23727	0.249909	0	0	0	0	0	0	0	0
ENSG00000107404.21	ENST00000378891.9	2.29491	3.43573	0	4.97284	6.09346	9.30548	17.2371	22.6537	17.5808	31.828	32.6261
ENSG00000107404.21	ENST00000378888.10	0	0	3.42954	0	0	0	0	1.92093	2.19941	0	0
ENSG00000162576.17	ENST00000342753.8	0.693862	0	0	0	0.917847	0.991814	0	0	0	0	0
ENSG00000162576.17	ENST00000309212.11	0	0	0	0.851202	0	0	10.7394	5.06203	11.2794	20.3465	12.7863
ENSG00000162576.17	ENST00000445648.5	0	0	1.84065	0	0	0	0	0	0	0	0
ENSG00000175756.14	ENST00000338370.7	0	6.42782	0	16.8884	12.6317	10.6505	45.7387	7.106	42.1064	16.8296	36.8251
ENSG00000175756.14	ENST00000321751.9	0	0	8.53639	115.089	89.7344	0	0	200.6	61.7346	135.831	80.8524
ENSG00000175756.14	ENST00000338338.10	34.1303	92.79	53.092	76.7399	109.276	197.196	199.766	0	123.765	0	0
ENSG00000175756.14	ENST00000378853.3	11.0867	0	0	0	0	0	0	0	0	0	0
ENSG00000221978.13	ENST00000400809.8	1.07796	0	0	0	0	0	1.5056	0	2.15257	0	1.25987
ENSG00000221978.13	ENST00000408918.8	0	0	0	2.36789	3.17979	2.65857	0	0	0	0	0
ENSG00000242485.6	ENST00000344843.12	48.6343	70.5926	46.3371	203.491	219.227	247.276	149.378	134.44	221.335	134.517	104.386
ENSG00000242485.6	ENST00000492508.1	0	0	0	3.33348	0	0	3.49298	0	0	3.70624	0
ENSG00000235098.9	ENST00000537107.6	0	0	0	0	0	0	0	0	0	1.68291	1.70127
ENSG00000235098.9	ENST00000520296.5	0	0	0	0	1.68497	0.900606	5.89778	12.8215	14.918	9.20732	0
ENSG00000235098.9	ENST00000427211.3	0	0	0	0	0	0	0	0	0	0	4.80255
ENSG00000205116.4	ENST00000378821.4	0	0	0	0	0	0	0.777851	0.774566	1.29438	1.59157	0
ENSG00000179403.12	ENST00000338660.5	10.5197	15.5895	4.94691	16.0829	14.0295	9.18732	18.7271	24.35	17.7391	14.0291	0
ENSG00000179403.12	ENST00000476993.2	0	2.60949	0.638568	0.387931	1.41323	0	9.36235	6.83092	12.6363	12.9043	14.0162
ENSG00000215915.10	ENST00000378785.7	0	1.31251	0	0	0	0	0.638071	0.640234	0	2.28675	1.69528
ENSG00000160072.20	ENST00000673477.1	0	0	0.418917	0.46008	0	0	5.91757	4.22333	8.83892	11.0455	7.15803
ENSG00000160072.20	ENST00000308647.8	0	0	0	17.2561	12.495	24.7773	0	6.22885	0	0	0
ENSG00000197785.14	ENST00000378756.8	0	0	0	16.1576	0	0	5.17539	18.452	19.3021	0	10.1176
ENSG00000197785.14	ENST00000536055.6	1.84511	5.0767	3.0993	0	16.2372	20.29	20.0892	0	0	0	0
ENSG00000205090.9	ENST00000378733.9	0	0	0	0	0	1.1003	0	0	0	0	0
ENSG00000205090.9	ENST00000624426.1	0	0	0	0	0	0	0	0	0	2.15895	0
ENSG00000160075.12	ENST00000291386.4	32.5155	35.5918	23.3683	100.489	103.728	120.316	91.7355	83.6184	98.9142	99.5541	99.652
ENSG00000160075.12	ENST00000359060.5	0.589668	1.38516	0.821193	0.282973	0.296704	0.951519	2.1026	0.883378	2.29661	2.72954	1.46215
ENSG00000228594.4	ENST00000422725.4	0	0	0	2.36663	0.621417	2.65715	6.7661	5.52408	4.78081	3.77902	2.41781
ENSG00000197530.13	ENST00000355826.10	0	0.610349	0	0	0	0	2.65943	4.40268	0	3.56984	7.55668
ENSG00000197530.13	ENST00000505820.7	0	0	1.0753	0	0	0	0	0	2.562	0	0
ENSG00000197530.13	ENST00000518681.6	0	0.721243	0	0	0	0	0	0	0	0	0
ENSG00000197530.13	ENST00000520777.6	0.771277	0	0	0	0	0	0	0	0	5.34883	0
ENSG00000197530.13	ENST00000504599.6	0	0	0	0	0	0	0	0	0	3.29075	1.96614
ENSG00000197530.13	ENST00000378708.5	0	0	0	0	0	1.35238	0	0	0	0	0
ENSG00000197530.13	ENST00000483015.1	0	0	0	0	1.44024	0	0	0	0	0	0
ENSG00000189409.14	ENST00000356026.10	3.84352	0	0	0	0	0	0	0	0	0	0
ENSG00000189409.14	ENST00000479814.5	0	0	0	0	0	20.7575	0	0	0	0	0
ENSG00000248333.9	ENST00000341832.11	0	2.7686	0	4.72922	5.2119	0	5.94521	6.42575	6.38984	11.558	4.59052
ENSG00000248333.9	ENST00000407249.7	0	0	0.439061	0	0	0.674246	0	0	0	0	0
ENSG00000189339.12	ENST00000617444.5	0	0	0	0	0	0	0	0	0	3.81873	1.65651
ENSG00000189339.12	ENST00000611123.1	1.34749	0.671551	1.41464	2.92237	3.0668	2.8412	3.23794	1.81544	2.92344	0	0
ENSG00000008128.23	ENST00000404249.8	1.96547	0	1.67364	2.97545	5.2814	7.23123	0.769334	2.8494	0.615444	7.2869	9.5053
ENSG00000008128.23	ENST00000356200.7	0	0	0	0	0	0	0	0	0	0.894307	0
ENSG00000008128.23	ENST00000479362.1	0	0	0	0	0	0	0	0	0	3.81605	0
ENSG00000008130.15	ENST00000341426.9	0	0	0	0	0	0	4.80314	0	15.0233	4.12769	0
ENSG00000008130.15	ENST00000341991.7	7.54772	5.37335	6.94325	9.73463	14.3568	14.8643	9.31406	12.4113	0	13.3552	17.1068
ENSG00000078369.18	ENST00000610897.4	0	10.2586	0	6.96328	0	0	22.2034	57.9931	0	13.899	7.35416
ENSG00000078369.18	ENST00000615252.4	12.0794	0	8.35297	51.9278	52.105	63.4982	34.5864	0	59.5228	39.1184	41.3
ENSG00000078369.18	ENST00000378609.9	0	0	0	0	7.56095	0	0	0	0	0	0
ENSG00000178821.13	ENST00000378602.3	0	0	0	0	0	0	20.957	26.2046	30.946	10.8717	7.9744
ENSG00000178821.13	ENST00000310991.8	2.23888	0	3.52568	4.85142	0	1.81565	2.26016	5.39261	0	0	0
ENSG00000067606.17	ENST00000378567.8	0	0	2.03956	0	0	2.2877	16.4161	8.88379	10.2681	20.584	12.1137
ENSG00000067606.17	ENST00000400921.6	0	0	0	0	0	0	0	1.68256	0	0	0
ENSG00000067606.17	ENST00000461106.6	0	0	0	2.49579	0	0	0	0	0	0	0
ENSG00000162585.17	ENST00000400919.7	0	0	1.10562	0	0	0	0	0	0	0	0
ENSG00000162585.17	ENST00000378543.2	0	0	11.2697	0	0	0	0	0	0	0	0
ENSG00000162585.17	ENST00000378546.9	0	30.2602	0	56.5491	58.3785	53.6696	100.419	152.278	112.204	92.8236	125.678
ENSG00000162585.17	ENST00000420515.1	0.892536	0	0	2.56994	2.72221	0	2.20762	5.9959	2.57421	1.85057	0
ENSG00000157933.10	ENST00000378536.5	0.921417	0.131202	0.967337	0.808089	2.60124	2.77545	1.99779	0.822806	1.98114	4.45333	5.63372
ENSG00000116151.14	ENST00000449373.2	0	0	0	0	0	0.275867	0	0	0	0	0
ENSG00000116151.14	ENST00000494279.2	0	0	0	0	6.19299	0	0	0	0	0	0
ENSG00000157916.20	ENST00000378513.7	0	0	0	0	0	19.9118	0	0	0	0	0
ENSG00000157916.20	ENST00000605895.6	8.11957	4.47767	4.41622	8.21061	7.29012	0	2.65401	6.02337	3.85035	10.1911	9.51068
ENSG00000157916.20	ENST00000378512.5	12.559	28.5663	20.078	41.045	50.9342	43.976	51.4844	51.4264	79.5585	46.825	42.4935
ENSG00000157911.11	ENST00000447513.7	0	1.67448	0	0	0	2.5247	0	3.36027	3.23247	6.34854	3.4034
ENSG00000157911.11	ENST00000507596.5	0	3.98289	2.38936	5.1743	2.56125	0	8.32393	7.25304	13.4556	0	7.14015
ENSG00000157911.11	ENST00000508384.5	0	0	0	0	0	0	0	3.17529	0	3.26227	0
ENSG00000149527.18	ENST00000419816.6	0	0	0	0	0	0	0	0.751606	0	0	0
ENSG00000149527.18	ENST00000278878.6	0	0	0	0	0	0	0	0	0.362563	0	0
ENSG00000157881.16	ENST00000435556.8	0.675108	0	0.708753	3.41341	5.63373	1.09498	5.06951	7.07358	3.94022	4.15277	5.98331
ENSG00000157873.18	ENST00000355716.5	0	6.32406	5.54856	0	0	0	6.13126	8.14561	4.2769	5.4296	7.80006
ENSG00000157870.17	ENST00000444521.6	0	0	0	0	0	0	0	0	0	8.24553	0
ENSG00000157870.17	ENST00000419916.8	0	0	0	0	0	0	7.42828	0	0	0	0
ENSG00000157870.17	ENST00000378427.6	0	0	0	1.36397	0	0	0	0	0	0	0
ENSG00000142606.16	ENST00000471840.5	0	0	0	0	0	0	3.80631	0	0	0	0
ENSG00000215912.12	ENST00000401095.8	0	0	0	0	0	0.145422	1e-06	0	0.149512	0.13788	0
ENSG00000142611.17	ENST00000270722.10	0	0	0	0.131301	0.413714	0.442255	0	0	0	0	0
ENSG00000142611.17	ENST00000463591.1	0	0	0	0	0	9.22621	0	0	0	0	0
ENSG00000130762.15	ENST00000378378.9	0	0	0	0	3.62272	0	4.48237	4.91412	3.48387	4.58975	3.73298
ENSG00000130762.15	ENST00000378373.5	0.391404	0.390129	0	1.69627	0	1.26966	0	0	0	0	0
ENSG00000162591.16	ENST00000356575.9	0	0	0	0	0	0	0.961896	1.27824	0.890665	0.98494	0.332306
ENSG00000162591.16	ENST00000294599.8	0.361211	0	0	0	0	0	0	0	0	0	1.30358
ENSG00000158109.15	ENST00000378344.7	0	0	0	0	0	0	0	21.1336	3.94618	10.6678	0
ENSG00000158109.15	ENST00000344579.5	8.71556	10.2584	7.89583	21.3319	15.021	24.3971	22.9992	0	22.6841	14.7597	25.6702
ENSG00000116213.16	ENST00000378322.7	0	0	0	5.1546	4.67291	6.40929	8.51396	5.25766	7.33845	6.75414	10.368
ENSG00000116213.16	ENST00000270708.12	1.0658	2.12178	1.6761	0	0	0	0	0	0	0	0
ENSG00000078900.15	ENST00000604074.5	0	0	0	0	0.51137	0	0	0	0	0	0
ENSG00000235169.11	ENST00000642557.4	0	11.9134	18.8219	4.31657	4.53369	0	179.672	147.51	165.83	123.357	134.388
ENSG00000235169.11	ENST00000561886.2	0	0	0	0	0	0	9.59022	0	5.12584	4.74369	0
ENSG00000235169.11	ENST00000444870.7	0	0	0	0	0	0	0	17.7839	54.1031	0	15.435
ENSG00000130764.10	ENST00000378251.3	2.27312	0.944047	2.78414	6.36769	5.84094	6.75921	3.41385	7.93925	11.0564	10.1956	7.0022
ENSG00000116198.14	ENST00000676052.1	0	0	0.454467	0	0	0	0.90464	0	0	0.914372	0
ENSG00000116198.14	ENST00000378230.8	0	0	0	0.868399	1.02569	0.602192	0	1.67511	2.15738	0	0
ENSG00000116198.14	ENST00000674623.1	0	0	0	0	0	0	0	0.348248	0	0.655299	0
ENSG00000116198.14	ENST00000675677.1	0	0	0	0	1.27692	0	0	0	0	0	0
ENSG00000116198.14	ENST00000675666.1	0.376808	0	0	0	0	0	0	0	0	0	0
ENSG00000116198.14	ENST00000674558.1	0	0.189942	0	0	0	0	1.1687	0	0	0	0
ENSG00000116198.14	ENST00000428079.6	0	0	0	0	0	0	0	0.456917	0.582026	0	0
ENSG00000169598.17	ENST00000378209.8	0	0	0	0	0	0.482019	1.78531	1.77934	1.48673	0	0.877205
ENSG00000198912.12	ENST00000361605.4	4.47702	1.11199	0	7.95099	9.18104	16.0599	7.66898	7.16345	9.18146	0	6.49484
ENSG00000198912.12	ENST00000680169.1	0	0	0.611689	0	0	0	0	0	0	0	0
ENSG00000198912.12	ENST00000680535.1	0.608025	0	0	0	0	0	0	0	0	0	0
ENSG00000069424.16	ENST00000378097.6	0	0	0	0	0	0	0	0	0	0	0.850264
ENSG00000069424.16	ENST00000666163.1	0	0	0.630616	0	0	0	1.88606	0	0	1.21803	0
ENSG00000069424.16	ENST00000671676.1	0	0	0	0	0	0	0	0	0	1.45079	0.551382
ENSG00000069424.16	ENST00000653262.1	0	0	0	0	0	0	0	1.61194	0.788138	0	0
ENSG00000069424.16	ENST00000341524.6	0	0	0	0	0	0.345599	0	0	0	0	0
ENSG00000069424.16	ENST00000352527.6	0	0.408013	0	0	0.621086	0	0	1.53349	2.65977	0	1.84971
ENSG00000069424.16	ENST00000663169.1	0	0	0	2.36034	0	0	0	2.44565	0	0	0
ENSG00000069424.16	ENST00000652845.1	0	0	0	0	0	1.82363	1.6886	0	0	0	0
ENSG00000069424.16	ENST00000669250.1	0	0	0	0	0	0	1.12495	0	0	1.52169	0
ENSG00000116251.11	ENST00000234875.9	28.1593	17.8495	33.6199	77.1617	60.1714	76.1488	171.033	154.944	169.187	221.912	203.301
ENSG00000116251.11	ENST00000497965.5	76.934	123.434	103.442	806.018	984.52	916.275	997.759	1182.41	799.438	937.821	1149.51
ENSG00000116251.11	ENST00000471204.5	0	0	0	0	8.08282	0	9.3109	0	0	0	0
ENSG00000116251.11	ENST00000465387.5	0	3.32272	0	0	0	0	3.7342	0	7.97155	0	0
ENSG00000158286.13	ENST00000377939.5	0.617311	0	0	0	0	0.333745	0.316094	0.924	0.686266	0	0.610822
ENSG00000116237.16	ENST00000343813.10	1.01355	1.88573	1.80601	17.2013	13.8531	10.7327	8.27361	5.79853	5.84832	2.16182	3.98904
ENSG00000158292.7	ENST00000377893.3	0	0	0	0	0	0.315406	0	0	0	0.598097	0
ENSG00000097021.20	ENST00000608083.5	3.32728	1.98986	0	23.0916	21.7795	34.0395	23.9202	23.4127	47.7163	12.6084	19.3169
ENSG00000097021.20	ENST00000361521.9	0	0	0	0	0	0	5.31383	1.93859	0	7.91345	14.0777
ENSG00000097021.20	ENST00000377845.7	0	0	1.36299	0	0	7.9322	0	0	0	0	0
ENSG00000097021.20	ENST00000545482.5	0	0	0	6.2263	4.49298	0	0	0	0	0	0
ENSG00000069812.11	ENST00000377834.8	0	0	0	0.276461	0	0	0.287394	0	0	0	0
ENSG00000187017.18	ENST00000645284.1	0	0	0	0	0	0	4.88778	3.2953	0.695359	4.58179	8.84552
ENSG00000187017.18	ENST00000636330.1	0	0	0	0.253885	0	0	1.50951	0.547075	0.301148	0.290704	0
ENSG00000187017.18	ENST00000461727.6	0.913278	1.07376	2.63949	0	0	0	11.8165	6.78264	8.07723	4.67018	0
ENSG00000187017.18	ENST00000478323.1	0	24.1375	0	0	0	0	0	0	51.4515	0	0
ENSG00000187017.18	ENST00000633239.1	19.8509	30.8527	26.1889	6.30322	11.2304	18.0078	44.5807	42.0334	39.1863	20.8576	25.5896
ENSG00000187017.18	ENST00000636644.1	0	3.48423	0	0	0	0	0	0	0	0	0
ENSG00000187017.18	ENST00000434576.2	1.61052	0	0	0	0	0	0	0	2.7433	0	0
ENSG00000187017.18	ENST00000477679.2	0	0	0	3.35158	0	0	0	0	0	0	0
ENSG00000215788.11	ENST00000377782.7	0	0	0	0	0.842485	0	0	0	0	0	0
ENSG00000171680.23	ENST00000535355.6	0	0	0	0	0	0	0	0	0	0	1.31555
ENSG00000171680.23	ENST00000400913.6	0	0	0	0	0	0	0.674649	0	0	0.345406	0
ENSG00000171680.23	ENST00000377728.8	0	0	0	0	0	0	0	0.690157	0	0	0
ENSG00000171680.23	ENST00000377740.5	0	0	0	0	0	0	0	0	0.974561	0	0
ENSG00000162408.11	ENST00000377705.6	0.361211	0.240023	0.252829	1.56544	1.64415	2.35825	1.80827	1.80222	1.20468	0.925794	0.355393
ENSG00000173662.21	ENST00000333172.11	0	0	0	0	0	0	0	0	0	0	0.901271
ENSG00000173662.21	ENST00000351136.7	0	0	0	0	0	0	0.711044	0	0	0	0
ENSG00000204859.13	ENST00000377674.9	0.460067	1.00137	1.32105	0	1.6661	0	0.83773	0.547882	3.09869	1.54546	4.32163
ENSG00000162413.17	ENST00000377658.8	0.362405	0.180612	0	2.61765	2.69166	4.11457	5.37753	5.69575	8.15844	6.87154	5.61593
ENSG00000162413.17	ENST00000377663.3	0	0	0	0	0	0	0.479009	0	0	0.446072	0
ENSG00000116273.6	ENST00000377648.5	1.13499	0.226259	0	3.69498	1.38547	6.99534	1.36366	3.51285	3.78532	4.53806	3.11139
ENSG00000041988.16	ENST00000054650.9	2.07177	0	1.45001	1.99525	4.19121	11.2009	8.29721	5.17467	3.45478	8.49599	7.13439
ENSG00000041988.16	ENST00000377627.7	0	0	0	0	5.78125	0	0	5.03556	0	0	0
ENSG00000007923.17	ENST00000377577.10	0.788535	0.432097	0.536734	2.71549	0	4.96759	5.00486	6.38931	5.46352	9.87453	7.7274
ENSG00000171735.19	ENST00000303635.12	0	0	0	0	0	0	0	0	0.477447	0.158839	0
ENSG00000171735.19	ENST00000473578.5	0	28.8843	32.9581	52.3818	26.4437	43.0846	97.4926	114.069	120.639	55.676	62.8155
ENSG00000171735.19	ENST00000495233.5	0	0	0	0	0	0	0	0	0	0	0.378034
ENSG00000171735.19	ENST00000476864.1	0	0	0	0	0	0	0	0	0	2.34416	0
ENSG00000049245.13	ENST00000054666.11	4.12824	2.80854	4.1794	29.4769	22.3954	21.9535	33.6812	28.5385	29.2095	24.574	22.1458
ENSG00000049246.15	ENST00000361923.2	0.128981	0.385673	0.541623	0	0	0	0.387408	0	0.430155	0.198344	0
ENSG00000049249.9	ENST00000377507.8	0	0	0	0	0	0.221508	0	0	0	0	0
ENSG00000116288.13	ENST00000493678.5	0	25.0618	7.61215	0	0	45.7577	6.84734	0	0	34.2908	0
ENSG00000116288.13	ENST00000377493.9	71.4693	87.9996	81.9526	276.595	279.396	269.071	266.886	297.547	267.478	176.704	196.879
ENSG00000116288.13	ENST00000338639.10	0	0	0	33.0606	16.1132	0	0	0	0	0	28.6853
ENSG00000116288.13	ENST00000377491.5	17.9372	30.8588	24.7422	61.4866	75.1807	0	95.4887	110.085	164.914	112.354	77.3559
ENSG00000116285.13	ENST00000474874.5	0	0	0	0	0	0	0	0	0	0	5.24578
ENSG00000116285.13	ENST00000377482.10	14.5777	2.41886	18.9678	17.7233	19.5848	23.6162	39.9687	49.2272	23.2494	88.3715	69.0155
ENSG00000142599.19	ENST00000400908.7	0	0	0	0	0	0	0	0	0	0.67304	2.21343
ENSG00000142599.19	ENST00000377464.5	1.18437	0.118049	0.248675	1.88201	2.51816	3.45769	2.13445	3.27213	0.791257	3.77401	0
ENSG00000142599.19	ENST00000659924.1	0	0.279253	0	0	0	0	0	0	0	0.430844	0
ENSG00000142599.19	ENST00000468247.1	0	0	0	0	7.06156	0	0	0	7.76105	7.15723	0
ENSG00000074800.16	ENST00000234590.10	32.7992	37.2955	44.6867	546.247	209.759	401.535	880.274	999.319	632.885	103.851	420.511
ENSG00000074800.16	ENST00000647408.1	0	34.1713	0	0	356.895	159.305	264.38	96.9328	242.511	506.638	176.859
ENSG00000197241.4	ENST00000400906.2	0	0	0	0	0.687408	0	0	0	0	0	0
ENSG00000180758.12	ENST00000377411.5	0	0	0.162936	0.896814	0.23548	2.26553	0.710064	0.696931	0.271958	2.14804	0.922153
ENSG00000049239.13	ENST00000377403.7	1.45243	0.516138	0.634237	0.74805	0	0.419939	0.25923	0.516726	1.44018	0.6636	1.01897
ENSG00000171621.14	ENST00000328089.11	0.268791	0	1.12875	7.3776	4.48608	9.59112	3.63312	2.39604	2.24112	3.30681	1.98355
ENSG00000171621.14	ENST00000357898.3	0	0	0	0	0	0	0	1.98078	0	0	0
ENSG00000171612.7	ENST00000302692.7	0.849499	1.27008	0.44591	9.52289	7.79945	8.78658	16.8034	20.6863	32.7085	13.6388	16.2811
ENSG00000188807.13	ENST00000340381.11	0	0	0	0	0	0.698563	0	0	0	0	0
ENSG00000188807.13	ENST00000340305.9	0	0.212502	0.223822	0.923952	2.59594	0.691581	2.24131	2.23381	1.77759	1.31143	0.3181
ENSG00000188807.13	ENST00000416541.5	0	0.478695	0	1.38757	1.09302	0	1.44262	1.07829	0.800859	2.21565	2.48075
ENSG00000171608.17	ENST00000377346.9	0.150335	0.148254	0	0	0	0.241243	3.151	2.30438	1.51056	2.51605	1.97562
ENSG00000171603.18	ENST00000435891.5	0	0.398384	0.419609	0	1.26084	0.584552	0	7.32001	0	14.3841	0
ENSG00000171603.18	ENST00000361311.4	0	0	0	1.71751	0	0	0	0	6.83848	0	0
ENSG00000178585.15	ENST00000377263.6	1.11438	0	0	3.52714	7.13252	2.71798	5.06439	8.83515	12.8666	3.86894	4.24408
ENSG00000178585.15	ENST00000400904.7	0	1.59965	0	18.626	19.6131	14.2954	36.2014	34.3232	62.838	30.8102	24.6749
ENSG00000178585.15	ENST00000377258.5	0	0	1.33699	0	0	0	0	0	0	0	0
ENSG00000162441.12	ENST00000488540.5	0	0	0	0	7.70939	0	0	0	0	0	0
ENSG00000162441.12	ENST00000377223.6	1.20002	0.642527	1.70086	1.64793	3.27756	4.21158	2.6345	3.68877	3.24726	3.29646	2.65559
ENSG00000162441.12	ENST00000400903.6	0	2.66303	0	0	0	0	4.55389	0	3.13781	14.066	0
ENSG00000162441.12	ENST00000377213.1	3.05183	0	0	11.0917	0	0	33.2962	40.9389	30.0325	0	26.6838
ENSG00000173614.14	ENST00000403197.5	0	0	0.95409	1.31285	1.37888	0	0	0	0	0	0
ENSG00000173614.14	ENST00000377205.6	0.881453	1.09818	0	0.954972	0	1.0722	1.65468	1.64925	1.97172	2.71092	1.62604
ENSG00000173614.14	ENST00000496751.1	0	0	0	0	4.93711	0	0	0	0	0	0
ENSG00000162444.12	ENST00000294435.8	4.08476	0	2.14417	11.8017	6.29958	0	0	0	0	0	0
ENSG00000130939.20	ENST00000343090.11	0.678868	0	0.142557	4.11891	5.99198	4.40431	2.85482	4.26778	4.36065	5.42866	2.70649
ENSG00000130939.20	ENST00000377153.5	0.749937	0	0	0	0	0	1.12628	2.24503	0	2.30653	1.10679
ENSG00000054523.20	ENST00000377093.9	0.2034	0.202737	0.213536	0.737222	1.08014	1.48455	0.305494	0.304451	0.847949	0.938373	0.150197
ENSG00000054523.20	ENST00000676179.1	3e-06	4e-06	5e-06	6e-06	7e-06	5e-06	6e-06	6e-06	7e-06	7e-06	6e-06
ENSG00000054523.20	ENST00000377086.5	3e-06	0.588564	4e-06	0.319385	6e-06	5e-06	0.553406	1.10312	0.984013	0.339995	0.779827
ENSG00000054523.20	ENST00000377081.5	0	0	1e-06	1e-06	1e-06	1e-06	1e-06	1e-06	1e-06	1e-06	1e-06
ENSG00000054523.20	ENST00000620295.2	0	0	1e-06	1e-06	1e-06	1e-06	0	1e-06	1e-06	1e-06	1e-06
ENSG00000054523.20	ENST00000622724.3	0.920888	0	0.096666	1e-06	0.139705	1.19489	0	1e-06	0	1e-06	0
ENSG00000142657.21	ENST00000270776.13	6.84638	13.6481	5.19102	99.5289	108.104	92.0462	68.0849	65.1976	70.4164	48.5677	48.2143
ENSG00000251503.8	ENST00000400900.6	0	0	0	0	0	0	0	1.97275	0	0	0
ENSG00000251503.8	ENST00000470413.6	0	0	0	3.23359	6.18964	6.60763	0	0	6.79349	0	0
ENSG00000175279.22	ENST00000309048.8	2.34127	2.33364	2.45795	18.4467	14.4635	9.49343	6.76191	15.6953	13.1597	0	5.22076
ENSG00000241563.4	ENST00000377049.4	0	0	2.42468	1.66821	0	0	2.13973	0	0	0	0
ENSG00000160049.12	ENST00000377038.8	0.530892	0.289959	0.696687	3.3007	2.81925	4.19444	4.61439	2.98704	2.90928	1.78544	1.29076
ENSG00000160049.12	ENST00000377036.2	0	2.52591	0.698619	5.62178	3.02901	4.87338	5.6664	1.53981	6.31538	3.32875	3.34933
ENSG00000142655.13	ENST00000356607.9	3.43821	6.86282	3.37325	9.28334	6.26803	9.67842	13.1044	14.7145	16.2196	20.4758	19.6681
ENSG00000130940.15	ENST00000377022.8	0.099927	0	0.104906	0.144354	0	0.648296	0	0	0.183728	0	0.187238
ENSG00000130940.15	ENST00000344008.5	0	0	0	0.266929	0.280355	0.299696	1.0408	0	1.20089	0.284153	0.471878
ENSG00000120948.19	ENST00000240185.8	4.09722	1.75321	2.7042	14.0392	9.74639	7.36711	13.7065	15.7286	15.9395	9.70531	10.1753
ENSG00000120948.19	ENST00000315091.7	0	0	0	4.11878	13.0805	33.6223	1.0663	0	0	0	0
ENSG00000009724.17	ENST00000400897.8	8.06836	7.29875	10.4845	0	0	0	0	0.537105	0.580495	0	1.66898
ENSG00000009724.17	ENST00000400898.3	152.543	217.271	184.888	0	0	0	8.17232	7.55099	0	8.91945	10.7782
ENSG00000116649.10	ENST00000376957.7	3.1786	11.3566	3.98717	118.895	104.712	51.3402	212.916	185.125	128.053	120.035	108.762
ENSG00000171824.14	ENST00000304457.11	0	0	0	0	10.3722	1.26674	8.0949	9.7648	7.336	6.21151	5.6621
ENSG00000171824.14	ENST00000376936.9	0	0	0	2.52788	0	0	0	0	0	0	0
ENSG00000198793.13	ENST00000376838.5	1.22283	1.42198	0.855844	3.67067	3.72041	5.28891	4.52989	0.986528	1.86791	2.92523	0
ENSG00000198793.13	ENST00000361445.9	0	0	0	0.201156	0	0	0.707937	0.782327	0.529611	2.04442	1.33776
ENSG00000120942.14	ENST00000376810.6	0.451063	0.449614	1.42063	5.21294	5.16336	3.29217	3.07026	5.89285	6.39346	9.01748	9.67796
ENSG00000116661.11	ENST00000354287.5	5.17875	35.3267	8.5456	49.692	49.3475	124.794	127.342	125.247	108.745	133.59	127.124
ENSG00000132879.14	ENST00000251546.8	0	1.94276	0	2.85994	0	0	7.45368	3.96104	5.3507	3.7726	7.91998
ENSG00000132879.14	ENST00000376770.5	0	0	0	0	1.13822	0	3.71942	0	0	0	0
ENSG00000132879.14	ENST00000251547.10	0	1.43075	0	0	0	0	0	0.688986	0.765989	1.90455	0.738139
ENSG00000132879.14	ENST00000376762.8	1.03426	0	2.1716	0	0	5.03248	0	0	0	0	0
ENSG00000116663.11	ENST00000376753.9	7.06886	2.56212	6.07184	11.14	1.95005	0	2.92709	8.84253	13.9309	5.92942	7.55155
ENSG00000116663.11	ENST00000449067.1	0	0	0	0	0	1.83437	0	0	0	0	0
ENSG00000116670.15	ENST00000376692.9	7.03924	26.6599	16.0439	46.4344	0	0	57.4202	38.6455	46.1898	41.1274	40.9224
ENSG00000116670.15	ENST00000235310.7	0.777075	0	0	0	0	0	0	0	0	0	0
ENSG00000116670.15	ENST00000376672.5	0	0	0	0	24.7577	19.8492	0	0	0	0	0
ENSG00000116670.15	ENST00000456915.1	0	0	0	0	0	1.59072	0	1.46802	0	0	0
ENSG00000177674.16	ENST00000376637.7	0	0	0	13.5618	0	0	0	0	0	27.3792	0
ENSG00000177674.16	ENST00000376629.8	3.60957	2.69835	6.63154	0	22.0744	27.8087	28.4601	43.2382	58.6867	0	26.6357
ENSG00000177000.13	ENST00000376592.6	0	0	0	0	0	0	1e-06	0	0	0	0
ENSG00000177000.13	ENST00000376590.9	0.113448	0.339237	0	0	0.688525	0.736024	0.17038	0.339623	0.567545	0.523389	0.334864
ENSG00000011021.23	ENST00000346436.11	0	0.14334	0	0.83098	0.218194	0.233247	1.31114	0.64694	0.239808	1.10575	1.06119
ENSG00000120937.9	ENST00000376468.4	0	0	0	19.5625	16.1043	203.363	0	2.50444	0	0	0
ENSG00000116685.16	ENST00000376572.8	3.59902	5.96472	5.65301	15.1751	17.2588	19.8705	31.023	33.5637	48.499	57.0099	34.4082
ENSG00000083444.17	ENST00000196061.5	0	12.3517	9.46043	6.90467	15.3825	0	49.8715	46.4207	38.0405	37.6714	39.2661
ENSG00000116688.18	ENST00000444836.5	1.64766	1.94103	0	0	3.62585	0.991438	0	1.86568	0	0	0
ENSG00000116688.18	ENST00000674817.1	0	0.384325	0	0	0	0	0	0	1.50305	0	0
ENSG00000116688.18	ENST00000675053.1	0	0	0	0	0	0	0	0	0	0.830637	0
ENSG00000116688.18	ENST00000674548.1	0	0	0	0	0	0	0	0	1.2857	0	0
ENSG00000116688.18	ENST00000675231.1	0	0	0	0	0	0	0.597016	0	0	0	0
ENSG00000116688.18	ENST00000675113.1	0	0	0	0	0	0	0	0	0	1.64548	0
ENSG00000116688.18	ENST00000235329.10	0	0	0.852192	0	1.51611	0	2.76109	3.81044	5.04551	1.19522	1.2572
ENSG00000116688.18	ENST00000676293.1	0	0	0	5.23366	0	1.79322	2.99397	0.557498	0.916521	0	0
ENSG00000116688.18	ENST00000675919.1	0	0	0.794103	1.1494	2.00025	2.00692	0	0	0	0	3.09306
ENSG00000116691.11	ENST00000235332.6	1.78313	0.592441	2.49599	7.70892	15.5856	2.56167	9.83411	12.4554	10.9027	10.1979	11.4037
ENSG00000048707.15	ENST00000620676.6	1.7e-05	1.7e-05	2.7e-05	3.8e-05	3e-05	0.00011	0.00014	2.6e-05	3.3e-05	3e-05	2.9e-05
ENSG00000048707.15	ENST00000613099.4	1.6e-05	1.6e-05	2.7e-05	3.7e-05	2.6e-05	0.000107	0.101994	2.5e-05	3.2e-05	3e-05	2.9e-05
ENSG00000048707.15	ENST00000011700.10	1e-06	1e-06	0	3e-06	2e-06	0.150468	1e-06	1e-06	2e-06	3e-06	3e-06
ENSG00000048707.15	ENST00000543766.2	1.06969	1.27948	0.22439	0.308756	1.29835	3.36707	0	1.28086	0.713314	0.657813	0
ENSG00000162496.9	ENST00000616661.5	32.5646	24.494	29.7114	5.11487	5.97825	12.7617	5.92455	8.9018	14.4701	16.3673	15.881
ENSG00000162496.9	ENST00000464917.5	0	0	0	3.82538	0	0	0	0	0	0	0
ENSG00000243073.4	ENST00000235349.6	0	0	0.506729	0	0	0	0	0	0	0	0
ENSG00000116731.23	ENST00000311066.10	0	0	0	0	0	0.354349	0.354244	0	0	0	0
ENSG00000116731.23	ENST00000376048.9	0.384353	0	0	0	0	0	0	0	0	0	0
ENSG00000116731.23	ENST00000413440.5	0.129587	0	0.272091	0.374404	0	1.89164	0.389238	0.581905	0.864376	0.797126	0.3825
ENSG00000116731.23	ENST00000343137.8	0	0.275931	0	0	0.210014	0	0	0	0	0	0
ENSG00000116731.23	ENST00000505823.5	1.87596	2.39948	0	0	0	0	3.0395	0	0	3.70201	0
ENSG00000189337.17	ENST00000376030.7	0.132403	0	0	0	0	0	0	0	0	0	0
ENSG00000189337.17	ENST00000361144.9	0	0	0	0	0	0	8.71791	7.04599	8.56332	11.4555	5.9999
ENSG00000189337.17	ENST00000400798.6	0	0	0.950154	0	0	0	0	0	0	0	0
ENSG00000171729.14	ENST00000428417.5	0	0	0	0	0	1.4714	8.85592	0	0	9.06808	0
ENSG00000171729.14	ENST00000376014.7	0	0	0	0	0	0	0	0	0	0	6.39908
ENSG00000171729.14	ENST00000400796.7	0	0.480498	0	0.696396	0	0	0	4.33013	9.6465	0	0
ENSG00000142634.13	ENST00000375980.9	3.53399	3.94448	4.45453	9.70069	10.724	12.037	7.10628	10.0561	15.9114	7.60913	13.5605
ENSG00000132906.18	ENST00000333868.10	0	1.19646	0	0	3.18722	0.952531	0	1.04642	2.5021	0	0
ENSG00000132906.18	ENST00000348549.9	0	0	0	1.61714	0	2.76251	0	0	0	0	0
ENSG00000116138.13	ENST00000616884.4	0.557732	0.679419	0.727315	1.57566	1.24107	2.07446	1.46613	1.06789	2.08865	0	0
ENSG00000116138.13	ENST00000375847.8	0	0	0	0	0	0	0	0	0	0.656751	1.24685
ENSG00000116771.6	ENST00000375826.4	5.10248	6.72376	7.62008	15.6675	17.1975	8.5858	45.2502	44.2178	51.2351	27.048	21.7054
ENSG00000197312.12	ENST00000480945.6	0.664398	0.734722	1.00602	0.958363	1.11841	2.03246	0.664223	1.56008	2.58529	0.680136	1.09035
ENSG00000116786.13	ENST00000375799.8	0	0	0	0	0	0	4.25348	0	0	0	0
ENSG00000116786.13	ENST00000375793.2	2.24967	0	0	4.76224	0	0	0	0	0	0	0
ENSG00000116786.13	ENST00000642363.1	0	1.51958	0.457292	0	5.94805	6.35839	0	7.23104	7.98996	6.70095	6.42852
ENSG00000162461.8	ENST00000294454.6	0.533288	0	0.279933	0	0	0.432478	0	0	0	0	0
ENSG00000162460.7	ENST00000375782.2	10.9338	19.2439	13.5043	4.64556	0.975844	1.04316	0.965924	1.92539	4.29003	0.989064	0.949203
ENSG00000162458.13	ENST00000375766.8	0	0	0	7.96457	6.1855	15.8486	8.65455	9.04405	4.17805	4.23829	2.23077
ENSG00000162458.13	ENST00000332305.5	0	0.597528	0	0	0	0	0	0	0	0	0
ENSG00000233954.7	ENST00000483273.2	0	0	0	0.599502	0	0.669732	0.620614	0	0	0	0.611497
ENSG00000065526.12	ENST00000375759.8	0.189832	0	0.199293	0.09142	0.384033	0.61579	0.855291	0.473574	0.844148	0.875782	0.373549
ENSG00000116809.12	ENST00000440560.5	0	0	0	5.42092	7.61167	3.14702	0	0	0	0	0
ENSG00000116809.12	ENST00000537142.5	0.339494	0.676776	0.712826	2.59167	1.98377	1.53196	3.56905	1.52448	1.24862	3.65455	2.50519
ENSG00000183888.4	ENST00000329454.2	0	0	0	0	0	0	15.7471	10.7128	11.0185	6.77243	4.46916
ENSG00000142627.13	ENST00000358432.8	0	0.414083	0.21807	11.4027	7.87907	16.5083	14.3444	14.6149	5.54211	12.6333	11.9494
ENSG00000132881.12	ENST00000375599.8	0	0	0.608457	0	0	0	0	0	0	0	0
ENSG00000037637.11	ENST00000375592.8	0.12846	0.256083	0	0.556721	1.16945	1.66683	2.89389	1.64111	2.35656	2.37058	1.13752
ENSG00000055070.17	ENST00000401089.3	0	0	0	0	0	0	0	0	0	15.8996	0
ENSG00000055070.17	ENST00000492354.1	2.67998	3.88545	3.59333	14.5708	14.6778	12.6451	19.6284	20.9996	20.2524	0	12.961
ENSG00000187144.11	ENST00000540400.1	0	0	0	0	0	0	0	1.50847	0	0	0.743667
ENSG00000157191.20	ENST00000337132.10	0	0	0	0	11.8558	14.0818	0	0	0	0	0
ENSG00000157191.20	ENST00000443980.6	3.19973	0.91123	2.87931	3.6642	0	0	0	13.0539	16.7694	12.653	10.7938
ENSG00000219481.11	ENST00000430580.6	0.140651	0.269287	0	0.648017	1.43605	1.48621	3.16186	2.41924	1.19172	2.76222	1.72929
ENSG00000058453.17	ENST00000375541.10	0	0	0.125754	0	0.181743	0	0	0	0.199746	0.368411	0.176782
ENSG00000058453.17	ENST00000445545.6	0	0	0	0	0	0	0	0.312183	0	0	0
ENSG00000117122.14	ENST00000375534.7	0	0	0	35.7116	32.3206	15.5476	0	0	3.55221	0	1.57191
ENSG00000159363.19	ENST00000452699.5	0	0.6153	0	2.67543	0	0	7.46458	7.084	5.55846	8.5438	4.56403
ENSG00000117118.10	ENST00000375499.8	48.4059	111.056	57.6775	89.2719	103.917	108.944	95.0621	138.452	125.81	92.502	71.1746
ENSG00000142623.11	ENST00000375471.5	0	0	0.43406	0	0	0	0	0	0	0	0
ENSG00000179051.14	ENST00000375436.9	0	0	0.216536	3.80418	6.01044	3.34619	4.64111	5.34063	6.08027	5.60722	7.47394
ENSG00000074964.17	ENST00000361221.8	0.372525	0	0	0	0	0	0	2.10138	3.58652	9.92389	7.99641
ENSG00000074964.17	ENST00000375415.5	0	0	0	0	0	0	3.0463	0	0	0	0
ENSG00000074964.17	ENST00000375408.7	0	0	0	2.58291	0	0	0	0	0	0	0
ENSG00000117154.12	ENST00000251296.4	0	0	0.490691	0	0	0	0	0	0	0	0
ENSG00000179023.9	ENST00000400664.3	0.16012	0.159598	0.336199	0	0	0	0.483345	0.23967	0.267009	0	0
ENSG00000159423.17	ENST00000538839.5	25.1402	25.2211	29.8059	5.73524	5.59511	7.99931	54.9539	36.0899	44.4512	29.908	29.3155
ENSG00000169991.11	ENST00000455833.7	0	0.129078	0	1.4966	0.785941	3.1506	0.972478	1.16302	1.12885	1.19488	1.52907
ENSG00000127481.15	ENST00000375225.7	1.52483	0	2.0374	0	10.801	14.7356	0	0	2.61868	0	0
ENSG00000127481.15	ENST00000375254.8	1.3e-05	1.3e-05	1.5e-05	1.8e-05	4.9e-05	9e-05	0.274206	0.087254	0.208282	0.758753	0.470227
ENSG00000127481.15	ENST00000375224.1	1.28915	2.13327	0.836762	4.13525	1.1186	0.540009	5.82048	6.7031	1.12339	7.30289	3.97543
ENSG00000127481.15	ENST00000425413.5	0	0	0	0	0.430587	0	0	0	0	0	0
ENSG00000127481.15	ENST00000417040.1	0	0	0	0	0	0.210021	0	0	0	0	0
ENSG00000127463.16	ENST00000477853.6	0	0.354662	0	0	1.64074	1.74831	1.6408	3.91636	3.95261	2.01175	4.06664
ENSG00000127463.16	ENST00000688219.1	0.371074	0	0	0	0	0	0	0	0	0	0
ENSG00000127463.16	ENST00000690732.1	0	0	0.311555	0	0	0	0	0	0	0	0
ENSG00000127463.16	ENST00000690823.1	0	0	0	1.57131	0	0	2.60515	0	2.30707	2.3767	1.42985
ENSG00000127463.16	ENST00000375199.7	0	0	0	0	0	0	3.15046	2.74975	0	3.01141	2.30456
ENSG00000127463.16	ENST00000375208.7	0	0.794832	0	0	1.34111	0	0	0	0	0	0
ENSG00000053372.5	ENST00000330263.5	1.70652	0.850481	0.895784	17.2796	14.2497	8.99555	28.3624	24.8357	39.1286	16.4023	18.7057
ENSG00000162482.5	ENST00000361640.5	61.3734	176.124	97.649	0	0	0	0	1.20259	0	0	0
ENSG00000053371.13	ENST00000235835.8	10.1134	20.0493	13.976	19.3579	28.3265	25.7852	42.7057	38.296	41.9671	4.22856	32.6529
ENSG00000053371.13	ENST00000330072.9	0	0	0	0	0	0	51.8585	26.9383	35.9	25.6473	0
ENSG00000040487.13	ENST00000375153.8	0	0	0	0	0	0	5.99077	6.13178	0	0	4.5236
ENSG00000040487.13	ENST00000375155.7	0	0	0	0	0	0	0	8.18772	13.6189	8.34857	0
ENSG00000040487.13	ENST00000400548.6	0	0	0	0	0	10.5473	0	0	0	0	0
ENSG00000077549.19	ENST00000264202.8	17.2328	25.1998	18.6569	80.6892	69.4912	99.41	118.6	95.0973	94.5575	69.7528	74.7557
ENSG00000077549.19	ENST00000375142.5	0	0	0	0	15.0136	6.16019	0	9.34881	8.15643	16.9729	0
ENSG00000077549.19	ENST00000674432.1	0	0.195569	0	0	0	0.324832	0	0	0	0.606709	0
ENSG00000077549.19	ENST00000674278.1	0	0	0	0.504782	0	0.283365	0	0	0	0	0
ENSG00000173436.15	ENST00000617872.4	0.238096	0	0	0	0	0	0	0	0	0	0
ENSG00000173436.15	ENST00000322753.7	0	0	0	1.0778	1.55179	1.17279	0	0.353114	0.798908	0.360971	0
ENSG00000158747.15	ENST00000375136.8	0	0	0	0	0	0	3.2491	0	0	0	0
ENSG00000158747.15	ENST00000548815.2	0.450666	0	0.473126	1.9531	4.81847	8.04045	0	5.39651	4.50906	5.83915	6.65111
ENSG00000162542.14	ENST00000294543.11	0	0	0	0	0	0	0	0	0.949628	0.875746	0.840452
ENSG00000178828.7	ENST00000375121.4	0	0	0	0	0	0	0	0	0	0	1.12659
ENSG00000169914.6	ENST00000375120.4	0.245112	0	0	0.531132	0	0.198777	0.552177	0	0	0	0
ENSG00000188784.4	ENST00000375116.3	0	0	0	0	0	0	0	0	2.38913	0	0
ENSG00000188257.12	ENST00000400520.8	0	0	0	0	0	0	0	58.6551	0	0	0
ENSG00000188257.12	ENST00000649436.1	30.9868	2.7143	0	0	0	0	57.3774	0	45.4104	16.751	18.3793
ENSG00000127472.11	ENST00000375108.4	0.460117	0	0	0	0	0	0	0	0	0	0
ENSG00000162543.6	ENST00000375099.4	0	0.288136	0	0	0	0	0	0	0.241026	0	0.213316
ENSG00000162545.6	ENST00000375078.4	12.3772	8.86053	14.3619	28.5784	23.0201	24.5869	99.9347	103.116	65.0368	91.6312	85.2886
ENSG00000090432.7	ENST00000264198.5	2.46709	1.05383	1.47996	3.5638	5.34721	8.57415	6.88193	6.35317	14.7997	12.8943	13.2922
ENSG00000183114.8	ENST00000332947.6	0	0	0	0.504483	0	0	3.14683	1.04544	2.32975	1.61111	2.06157
ENSG00000158825.6	ENST00000375071.4	0	0	8.63792	0	0	0	0	0	0	0	0
ENSG00000158828.8	ENST00000321556.5	1.34863	10.8241	3.91132	0.924749	0.973481	0.97384	5.70721	8.37809	9.47871	16.6766	19.7641
ENSG00000244038.11	ENST00000602624.7	18.1566	10.4061	15.271	80.1715	87.9629	77.9791	161.062	166.657	219.683	161.191	167.829
ENSG00000127483.19	ENST00000438032.6	0.242347	0	0	0	0	0	0	0	0	0	0
ENSG00000127483.19	ENST00000312239.10	2.33593	1.89516	1.55253	6.75563	7.2411	12.6781	8.56737	8.2217	8.45655	7.22171	5.14174
ENSG00000127483.19	ENST00000375003.6	0	0	0	0	0.868789	0	0	0	0	0.75343	0.869613
ENSG00000075151.24	ENST00000374935.7	0	0	0	0	0.559313	1.34247	0	0	0	0	0
ENSG00000075151.24	ENST00000264211.13	0.554066	0	0.581678	0	0	1.18356	1.15674	0	0	1.41132	0
ENSG00000075151.24	ENST00000685872.1	0	0.354767	0	1.76678	0	0	1.40837	0	0	0	0
ENSG00000075151.24	ENST00000602326.6	0	0.384681	0	0	0	0	0	0	1.24975	2.18487	0
ENSG00000075151.24	ENST00000686579.1	0	0	0	0	0.812492	0	0	0	0	0	0
ENSG00000075151.24	ENST00000688741.1	0	0	0	0	0	0	0	1.18603	0	0	1.55921
ENSG00000075151.24	ENST00000682284.1	0	0	0	0	0.633582	0	0	0	0	0	0
ENSG00000117298.16	ENST00000374893.11	3.02842	1.74804	1.33866	5.52607	6.28815	12.1503	6.04442	6.78973	5.05058	6.53574	5.41068
ENSG00000142794.19	ENST00000318249.10	0.436558	0	0	0	0	0	0	0	0	0	0
ENSG00000142794.19	ENST00000342104.9	0	0.221544	0	0	0	0.506374	0.356008	0	0	0	0
ENSG00000162551.14	ENST00000374840.8	0	0	0	0	0	0	0	0.96491	0	0	0
ENSG00000162551.14	ENST00000539907.5	2.42403	2.68978	2.31578	0	0	0	8.68623	0	0	0	0
ENSG00000162551.14	ENST00000540617.5	0	0	0	0	0	0	0	0	0.680432	0	0
ENSG00000076864.21	ENST00000374765.9	0	0	0	0	0	0	0	0	0	13.8347	0
ENSG00000076864.21	ENST00000542643.6	0	0	0	0	0	0	4.33182	0	5.64307	0	8.91839
ENSG00000090686.16	ENST00000308271.14	0	1.10134	0.599099	1.86223	0	2.88642	0	2.38771	0	2.71564	1.50582
ENSG00000090686.16	ENST00000400301.5	0	0	0	0	0	0	2.15952	0	0.338008	0	0
ENSG00000090686.16	ENST00000374732.7	0.275443	0	0.54978	0	3.34335	0	0.797516	0	0	0	0.5965
ENSG00000090686.16	ENST00000421625.6	0	0	0	1.7273	1.36064	1.6176	2.00865	1.98668	2.95512	3.06005	1.32349
ENSG00000142798.20	ENST00000374695.8	0.146324	0.066941	0	0.198972	1.2e-05	1.2e-05	1.24022	0.964296	0.474924	0.559211	1.04553
ENSG00000289694.1	ENST00000695856.1	5.47957	1.78064	4.60098	0	0	10.1676	8.45491	12.2679	9.54997	0	5.28004
ENSG00000070831.18	ENST00000400259.5	0	0	0	2.40985	0	0	0	0	1.53236	0	0
ENSG00000070831.18	ENST00000344548.8	4.32557	4.61277	0	14.4321	10.2986	8.22477	10.0159	12.365	12.7368	13.3812	11.2003
ENSG00000070831.18	ENST00000411827.2	0	0	0	2.49663	9.56073	0	19.358	11.8682	3.94642	5.54644	0
ENSG00000070831.18	ENST00000695858.1	3.22003	0	2.78964	0	0	9.47539	2.4161	0	0	2.71312	0
ENSG00000070831.18	ENST00000315554.14	0	0	0	0	0	1.02093	0	0	0	0	0
ENSG00000070831.18	ENST00000656825.1	1e-06	1e-06	0	1e-06	1e-06	1e-06	1e-06	1e-06	1e-06	2e-06	2e-06
ENSG00000070831.18	ENST00000695796.1	0	0	1.83675	0	0	0	0	0	0	0	0
ENSG00000070831.18	ENST00000695797.1	0.884126	1.95943	0	9.02134	10.8763	6.44702	9.09379	10.996	16.9801	2.55372	8.31646
ENSG00000070831.18	ENST00000695798.1	0	2.00404	0	2.58139	0	0	0	2.1101	0	0	0
ENSG00000070831.18	ENST00000695802.1	1.15771	2.65566	0	5.22017	11.2786	6.56758	0	0	0	2.72104	3.64665
ENSG00000162552.15	ENST00000290167.11	0	0.411634	0	0	0	0	0	0	0	0	0
ENSG00000184677.18	ENST00000375647.5	1e-06	1e-06	0	1e-06	1e-06	1e-06	1e-06	0.408582	1e-06	1e-06	1e-06
ENSG00000184677.18	ENST00000404138.5	1e-06	1e-06	0	1e-06	1e-06	1e-06	1e-06	1e-06	1e-06	1e-06	1e-06
ENSG00000184677.18	ENST00000374651.8	0.094583	0.094275	0	0.95646	0.717548	0.76705	0.426152	0	0.6309	0.581815	0.558457
ENSG00000173372.18	ENST00000374642.8	2.49929	0	3.46659	0	0	0	0	0	0	0	0
ENSG00000173372.18	ENST00000438241.2	3.14473	3.8464	2.42352	0	0	0	0	0	0	0	0
ENSG00000159189.13	ENST00000374640.9	0	4.2103	0	0	0	0	0	0	0	0	0
ENSG00000159189.13	ENST00000374639.7	5.7554	0	0	0	0	0	0	0	0	0	0
ENSG00000159189.13	ENST00000374637.1	0	0	1.91954	0	0	0	0	0	0	0	0
ENSG00000173369.18	ENST00000695760.1	0	2.63639	0	0	0	0	0	0	0	0	0
ENSG00000173369.18	ENST00000695762.1	1.99205	0	1.04566	0	0	0	0	0	0	0	0
ENSG00000173369.18	ENST00000509305.6	0	3.60628	0	0	0	0	0	0	0	0	0
ENSG00000133216.17	ENST00000374630.8	0	0	0	0	0	1.1e-05	0	0	0	0	0
ENSG00000133216.17	ENST00000400191.7	0	0	0	0	0	0.11786	0	0	0	0	0
ENSG00000215906.9	ENST00000426928.7	0	0	0	0	0	0	0	0.675753	0	0	0
ENSG00000004487.18	ENST00000692975.1	0	0	0	0	0	0	0	1.91412	2.64449	2.34011	0
ENSG00000004487.18	ENST00000691682.1	0	0	0	0	2.14507	0.719756	0.871949	0	0	0	0
ENSG00000004487.18	ENST00000691404.1	0	0	0	1.1841	0	0	0	0	0	0	0.936938
ENSG00000004487.18	ENST00000465864.2	0	0	0	0	0	0	0	1.01624	1.92375	0	0
ENSG00000004487.18	ENST00000690627.1	0	0.614076	0	0	0	0	0	0	0	0	0
ENSG00000004487.18	ENST00000686771.1	0	0	0	0	0	0	1.17847	0	0	0	0
ENSG00000004487.18	ENST00000356634.7	0	0	1.15834	0	3.55963	0	13.8645	16.5644	8.54324	8.7156	8.79497
ENSG00000004487.18	ENST00000400181.9	0	0	0	4.07406	0	2.67575	7.42865	0	8.64808	0	0
ENSG00000004487.18	ENST00000685243.1	0	0	0.922432	0	0	6.54502	0	0	0	0	0
ENSG00000169641.14	ENST00000302291.8	0.177578	0	0	1.28341	0.808295	1.15208	1.33346	1.1961	0.740592	0.955787	0.655191
ENSG00000179546.5	ENST00000374619.2	0	0	0	0	0	0	0	0	0.417125	0	0
ENSG00000125944.21	ENST00000302271.11	0	0	0	0	0.433985	0	0	0	0	0	0.416011
ENSG00000125944.21	ENST00000478691.5	0.377675	0	0.397057	0.420384	0	0.221962	0.435369	0.661925	1.25166	0	0
ENSG00000125944.21	ENST00000374616.7	0	2.50756	0	13.6554	10.286	7.51678	33.6518	33.1592	34.1825	26.6603	18.8544
ENSG00000125945.15	ENST00000314011.9	0.182148	0.363109	0.573676	0	0	0	0	0	1.21497	0	0
ENSG00000125945.15	ENST00000374608.3	0	0	0	0	0.329234	0	0.65181	0	0	0	0.320575
ENSG00000204219.11	ENST00000450454.7	21.264	26.9767	23.0034	9.05701	9.51604	6.77844	42.1326	33.5699	48.5612	23.346	26.2956
ENSG00000204219.11	ENST00000476978.2	0	0	0.691428	0	0	0	0	1.67289	5.65852	0	0
ENSG00000088280.20	ENST00000495646.5	1.00035	1.66182	0	3.5292	2.02657	0.540833	1.67059	0	0	0	0
ENSG00000088280.20	ENST00000336689.8	0	0	0	0.593401	0	0	1.71816	2.41889	1.68458	4.03814	1.49057
ENSG00000007968.7	ENST00000361729.3	0	0	0	0.896995	0.235528	0.755329	0.699401	0.464709	0.776575	0.238719	0
ENSG00000117318.9	ENST00000374561.6	12.84	7.64341	3.45024	237.505	287.318	268.273	188.558	238.134	158.121	33.7184	40.6887
ENSG00000142676.14	ENST00000374550.8	640.233	573.118	593.905	1494.27	1519.32	1570.97	3115.36	3021.05	3086.9	3187.18	3775.58
ENSG00000142676.14	ENST00000643754.2	0	0	0	0	0	0	0	7.51955	0	0	0
ENSG00000142676.14	ENST00000458455.2	0	0	0	0	0	0	0	0	13.025	6.78066	8.00586
ENSG00000057757.10	ENST00000246151.9	5.15393	7.9911	4.80958	14.8907	9.55759	3.03893	12.0433	12.8991	15.279	13.2097	13.5228
ENSG00000057757.10	ENST00000374524.1	0	0	0	0	0	14.0056	0	0	0	0	0
ENSG00000011009.11	ENST00000374514.8	10.7095	12.1507	10.478	23.2665	31.5267	31.453	57.2807	60.3133	57.4125	56.2493	52.7184
ENSG00000117308.15	ENST00000617979.5	2.77965	0	0	0	0	0	0	0	0	0	0
ENSG00000117308.15	ENST00000374497.7	0	8.12331	9.01119	22.0063	16.0621	6.11814	56.6054	41.5671	58.3846	26.8967	25.5752
ENSG00000117308.15	ENST00000456977.5	24.3829	5.41295	0	0	19.1094	17.4139	0	0	0	0	0
ENSG00000117305.15	ENST00000374490.8	22.6828	56.897	67.1763	10.0774	9.39904	16.4134	16.7574	17.1279	20.3573	10.3511	12.084
ENSG00000117305.15	ENST00000436439.6	14.4172	0	0	0	0	0	0	0	0	0	0
ENSG00000117305.15	ENST00000235958.4	64.4291	0	0	0	0	0	0	0	0	0	0
ENSG00000179163.12	ENST00000374479.4	10.9001	12.374	13.3041	8.69373	5.84708	8.33136	10.9288	17.9402	14.2762	12.551	9.10196
ENSG00000189266.13	ENST00000334351.8	7.85429	4.9819	4.49797	9.79908	15.9293	14.4806	29.4676	28.5129	35.125	15.799	12.2666
ENSG00000188529.15	ENST00000492112.3	0	0	0	1.75177	2.97743	1.11519	3.4349	0	1.49313	1.11526	0.697891
ENSG00000188529.15	ENST00000344989.10	0	0	0.390557	0	0	0	0	3.32682	0	0	0
ENSG00000188529.15	ENST00000453840.7	4.19474	2.94586	6.42865	22.5339	22.0962	23.817	12.5681	18.8959	19.0847	9.07111	15.6464
ENSG00000188529.15	ENST00000343255.9	0.863495	0.860682	1.2087	2.81096	4.70938	7.79502	2.91257	4.73924	8.70166	2.85358	4.33952
ENSG00000142661.19	ENST00000338909.9	0	0	0	0	0	0	2.35948	2.59897	2.33799	0	0
ENSG00000142661.19	ENST00000374434.4	0	0	0	0	0	0	0	0.724592	0.822089	1.07144	1.02827
ENSG00000142677.4	ENST00000270800.2	0.29904	0.596132	0.627886	0	0.453722	0.485023	2.24557	2.26594	3.49066	3.27682	4.5032
ENSG00000185436.12	ENST00000327535.6	0.533659	0.177307	0.186751	0	0	0.577039	0.801468	0.266263	2.07644	0.27359	0.525063
ENSG00000185436.12	ENST00000374418.3	0	0	0	0	0	2.93068	0	0	0	0	0
ENSG00000158055.17	ENST00000690803.1	0	0	0	0	0	0	0.501005	0	0	0	0
ENSG00000001460.18	ENST00000003583.12	0	0	0	0	0	0.542718	0	0.500853	1.11597	0	0
ENSG00000001461.17	ENST00000374399.9	0.299799	0.149433	0	0	0	0.486253	1.01906	0.448744	0.342698	1.15259	1.32736
ENSG00000001461.17	ENST00000339255.2	0	0	0	0	0	0	1.19191	0	1.46186	0	0
ENSG00000117602.13	ENST00000538532.6	0	0	0	0	0	0	1.38013	0	0	1.17934	2.0872
ENSG00000117602.13	ENST00000618490.4	0	0	0	0	2.1508	0	0	0	0	0	0
ENSG00000117602.13	ENST00000374395.9	0	0.115729	0	0.670915	1.06881	1.12991	0.244298	1.39439	0.56781	0.862577	0
ENSG00000117602.13	ENST00000436717.6	0	0	0	0	0	0	0	1.96601	4.99414	0	0
ENSG00000184454.7	ENST00000374392.3	0.205826	0.615465	0.432166	0	0	0.333835	0.618233	0.616165	1.06319	0	0.303765
ENSG00000133226.18	ENST00000323848.14	1.54203	1.09787	2.31269	4.77348	4.3451	5.00216	4.31349	2.63788	3.31393	3.38767	2.60117
ENSG00000169504.15	ENST00000374379.9	9.46996	4.58801	8.85952	14.4445	12.5129	15.1381	18.4359	15.5555	20.3011	15.3412	16.5629
ENSG00000020633.19	ENST00000308873.11	0	0.190501	0.200649	0	0	0	0	0	0	0	0
ENSG00000020633.19	ENST00000338888.3	0	0	0	0	0	0	0	0.482965	0	0	0
ENSG00000117614.10	ENST00000236273.9	6.32338	6.09098	4.81157	11.0347	11.5898	12.3893	9.17756	10.4609	15.3985	22.6331	24.2548
ENSG00000117616.18	ENST00000243189.12	0	0	0	0	3.38266	0	0	3.34538	0	0	3.33154
ENSG00000187010.21	ENST00000328664.9	0	0	0	0	0	0	0	0	0	0.602363	0
ENSG00000183726.11	ENST00000374358.5	3.98039	6.38986	1.87933	16.7538	29.5228	37.6687	27.4772	28.9448	28.9186	33.8407	29.1447
ENSG00000188672.19	ENST00000294413.13	0	0	0.743709	0	0	0	0	0	0	0	0
ENSG00000204178.11	ENST00000399766.7	2.37463	0	0	0	0	5.72661	0	0	0	0	0
ENSG00000204178.11	ENST00000374343.5	0.955186	2.22707	1.96582	4.80948	0.829451	0	2.49973	0.837365	0.904079	4.47933	1.98122
ENSG00000157978.12	ENST00000374338.5	0.576313	1.7233	1.8151	3.05305	1.74883	3.73895	2.1693	4.74517	4.80515	1.34633	1.27581
ENSG00000117643.15	ENST00000611903.4	1.39694	0.329344	0	0	0	0.566411	0	0	0	0	0
ENSG00000117643.15	ENST00000263979.7	0	1.32218	2.37319	0	0	0	0	0	0	0	0
ENSG00000117643.15	ENST00000374329.1	0	0	0	0.501518	0.526744	0	0	0	0	0	0
ENSG00000162430.18	ENST00000374315.1	0	0.579435	0.813733	2.51936	3.52811	2.20004	5.06587	4.06281	2.26193	1.78795	2.85983
ENSG00000117640.18	ENST00000474295.5	0	0	3.17905	0	0	5.3687	0	0	0	14.5436	0
ENSG00000117640.18	ENST00000374303.7	0	6.44982	0	8.46342	0	0	0	0	0	0	0
ENSG00000117640.18	ENST00000374307.9	0	0	3.28468	0	5.04395	0	13.1547	6.66111	13.9694	0	18.2008
ENSG00000117640.18	ENST00000374301.7	7.97983	0	0	0	0	0	0	0	0	0	0
ENSG00000127423.11	ENST00000538789.5	0	0	0	0	0	0	0	0	0	0	0.991556
ENSG00000127423.11	ENST00000374298.4	0	0	0	2.32217	2.43757	0.651432	3.01599	2.40472	4.85596	1.2353	0
ENSG00000182749.6	ENST00000675840.1	0.315244	0.314217	0.330955	0	0	1.53391	0.946891	0.471862	4.73118	3.39351	3.25675
ENSG00000117632.23	ENST00000455785.7	0	0	4.05129	182.691	164.955	140.324	68.1176	41.9272	78.5484	19.1513	7.27682
ENSG00000117632.23	ENST00000357865.6	6.91834	1.72395	0	111.447	169.198	92.3706	106.374	152.071	192.469	28.8633	47.7046
ENSG00000158006.14	ENST00000374282.8	2.13453	1.89113	0.995931	2.05564	2.51903	2.30835	1.42488	1.06497	1.47361	1.82357	2.45011
ENSG00000158006.14	ENST00000374284.5	0	0	0	0	0	0	0	0	1.87643	0	0
ENSG00000158008.10	ENST00000374280.4	0	0	0	0	0	0	0	0	0	0.313164	0.90163
ENSG00000175087.10	ENST00000374269.2	0.397482	0.198094	0.625945	0.287101	0	0	0.597001	0.297478	0.994234	0.611254	0
ENSG00000142684.9	ENST00000374266.7	33.57	45.257	12.4351	126.584	145.922	147.287	136.87	203.888	146.038	139.292	154.491
ENSG00000130695.16	ENST00000451429.8	0	0	0	0	0	0	3.44272	0.880599	1.59221	0.961419	1.23023
ENSG00000130695.16	ENST00000453146.1	0	0	0	1.29495	0	0	0	2.31363	0	0	0
ENSG00000142669.15	ENST00000270792.10	30.7371	28.8363	28.9078	162.653	173.879	318.528	121.926	143.129	97.0284	66.8253	64.534
ENSG00000158062.21	ENST00000357089.8	0	0	0	0.849432	0	0	7.0647	1.76027	7.23731	1.80849	0
ENSG00000158062.21	ENST00000374217.7	0	0	0	0	2.06223	5.87865	0	0	0	0	0
ENSG00000169442.9	ENST00000374213.3	3.52264	3.51116	3.69844	0	0	0	0	5.27274	0	0	0
ENSG00000176092.17	ENST00000308182.10	0	0	0	0.241191	0.733301	1.65758	0	0	0	0	0.227124
ENSG00000176083.18	ENST00000349618.8	0	0	0.584631	0	0	0	0	0	0	0	0
ENSG00000117682.17	ENST00000427245.6	0	0	0	0	0	0	1.86319	0	0	0	0
ENSG00000117682.17	ENST00000526219.5	0	1.53352	0	0	0	0	5.65975	0	0	0	0
ENSG00000117682.17	ENST00000374185.7	0	0	0	0	1.29606	0	0	1.27859	1.42444	0	0
ENSG00000117682.17	ENST00000360009.6	0	0	0	2.22198	2.72356	4.15734	3.83562	5.37415	3.42343	2.37774	0.917313
ENSG00000117682.17	ENST00000436153.6	0	0	0	0	0	0	0	0	0	0	3.91475
ENSG00000117682.17	ENST00000431933.5	0.950415	0.742427	0.665186	0	0	0	0	0	0	0	0
ENSG00000198830.11	ENST00000361427.6	0.745331	1.70193	0	6.8982	4.07499	5.87786	4.11964	2.68996	8.86367	0	2.52341
ENSG00000198830.11	ENST00000619352.4	33.3731	65.862	62.9657	369.848	378.957	329.14	253.703	245.8	332.535	66.561	73.0836
ENSG00000117676.14	ENST00000374166.8	0	0	0	0	0	0	0	0	0	0	3.53926
ENSG00000117676.14	ENST00000530003.5	0.8305	0.275999	1.16255	0.799826	2.10014	3.14303	5.89869	7.9337	9.69627	6.38578	0
ENSG00000117713.21	ENST00000324856.13	0	0	0	0	1e-06	1e-06	0	0	1e-06	1e-06	0
ENSG00000117713.21	ENST00000636219.1	0.451131	0.112414	0.947224	0.981059	0.691415	2.01218	1.01628	1.89579	0.752282	0.693753	1.33159
ENSG00000060642.12	ENST00000686194.1	0	1.44621	4.12697	0	0	2.71754	0	0	0	0	0
ENSG00000060642.12	ENST00000674335.1	0	0.353629	0	0	0	0	0	0	0	0	0
ENSG00000060642.12	ENST00000693629.1	2.36807	0	0	0	0	0	0	0	0	0	0
ENSG00000060642.12	ENST00000686655.1	2.58512	0	1.87503	0	4.08842	0	0	0	0	0	0
ENSG00000060642.12	ENST00000688730.1	0	1.26487	0	0	0.761056	0	0	0	1.83118	0	0
ENSG00000060642.12	ENST00000688522.1	1.5576	0.586948	1.0229	1.0334	0	0	2.1487	0	3.58711	0	3.56754
ENSG00000060642.12	ENST00000691454.1	1.31974	0	0	0	0	0	0	0	0	0	0
ENSG00000060642.12	ENST00000686325.1	0	0	0	0	0	0	0	0	0	0	0.701185
ENSG00000060642.12	ENST00000674222.1	0	0	0	0	0	0	0	0	1.08727	0	0
ENSG00000060642.12	ENST00000691135.1	0	0	0	0	0	0	0	0	0	0.256225	0
ENSG00000060642.12	ENST00000374145.6	0.814769	0	0	0	0	0	0	0	0	0	0
ENSG00000060642.12	ENST00000674273.1	0	0	0	0	0	0	0	0.730123	0	0	0
ENSG00000060642.12	ENST00000078527.9	0	0	0	0	0	0	0	0	0	0.649941	0
ENSG00000204160.12	ENST00000374142.9	0.640612	0.478795	0.672399	3.00702	2.67504	3.37615	5.05008	4.37012	2.40308	3.96238	2.36311
ENSG00000175793.12	ENST00000339276.6	0	0	0	33.6194	42.4552	39.9889	38.1552	40.5133	13.7594	6.69089	7.49145
ENSG00000142751.15	ENST00000374135.9	0.20139	0.693327	0.185215	1.76124	1.79053	1.30171	3.14689	3.32586	1.73652	3.47651	3.3364
ENSG00000142751.15	ENST00000374133.3	1.38741	0	0	0	8.03557	9.32707	0	0	3.01598	0	0
ENSG00000198746.13	ENST00000445019.5	0	0	0	0	0	38.1213	0	0	0	0	0
ENSG00000198746.13	ENST00000361720.10	0.409347	0.408013	0.429747	7.16031	6.21086	3.92379	3.70558	7.3526	4.09565	5.68065	3.06173
ENSG00000090273.14	ENST00000321265.10	13.9455	42.9646	23.5352	56.8091	52.6711	46.8187	120.83	114.892	94.9181	101.081	84.9707
ENSG00000131910.5	ENST00000254227.4	39.4528	51.0154	26.3888	13.322	10.9035	9.5183	162.391	182.265	147.074	218.807	247.198
ENSG00000175707.10	ENST00000320567.6	0	0.476609	0.501996	1.38152	0	0.775553	5.02689	5.01009	2.3921	1.47066	1.41139
ENSG00000253368.4	ENST00000522111.3	0.44856	0	0	30.8861	36.008	33.4666	95.1392	99.3005	53.1191	149.755	136.078
ENSG00000158246.8	ENST00000289166.6	0	0	0	1.04019	0.546253	1.75181	0	0.538892	0	0	0
ENSG00000090020.11	ENST00000263980.8	0	0	0	0	0	0	0.770931	0	0	0.526267	0.505075
ENSG00000142784.16	ENST00000319394.8	0	0	0	0.248903	0	0	0.776293	3.61059	0	0	1.78
ENSG00000142784.16	ENST00000361771.7	0.572232	1.7111	2.60325	0	2.31527	1.23749	0	0	2.40545	3.81328	0
ENSG00000186501.15	ENST00000374076.9	0	0	0	0	0	0	0	0	0	24.1469	0
ENSG00000186501.15	ENST00000608611.5	6.0855	2.4261	3.37784	0	5.53958	11.8435	18.059	11.8624	19.2796	0	17.9612
ENSG00000142765.18	ENST00000618673.4	0	0	0	0	0	0	0	0	5.12754	0	0.774675
ENSG00000142765.18	ENST00000318074.9	0	0	0	1.34386	0.705728	0	0	5.57104	0	0	0
ENSG00000142733.17	ENST00000486046.5	0	3.9253	0	5.23337	0	6.38737	0	0	0	0	0
ENSG00000142733.17	ENST00000374040.7	0	0	0	0	0	0	1.98847	0	0	0	0
ENSG00000142748.13	ENST00000354982.2	3.08378	71.714	15.1151	0	0	0	0	0	0	0	0
ENSG00000181773.7	ENST00000374024.4	0	0	0	0	0	0	1.83259	1.82658	0	0	0.600291
ENSG00000158195.11	ENST00000618852.5	0.282745	0.422736	0.445254	3.0634	2.57555	3.7063	7.54717	4.80852	3.0647	5.21772	3.12968
ENSG00000126705.15	ENST00000673934.1	0	0	0	0	0	0	0	0	0	0	1.47018
ENSG00000126705.15	ENST00000644989.1	0.262363	0	0.413156	0.379028	0.597108	0.425534	0.788051	1.1917	1.96877	0	0
ENSG00000126705.15	ENST00000642416.1	0	0	0	0	0	0	0	0	0	0.645912	0
ENSG00000126709.16	ENST00000361157.11	39.6503	116.241	11.4559	0	8.2782	11.0616	22.5336	18.375	22.7455	69.2204	61.7762
ENSG00000009780.16	ENST00000373954.11	0	0.22986	0	0	0.349897	0.748071	0	1.03555	0	0.354637	1.02103
ENSG00000009780.16	ENST00000419687.6	0	0	0	0.785665	0	0	0	0	0.90715	0	0
ENSG00000009780.16	ENST00000373949.5	0.379415	0	0.398323	0	0	0	1.70946	0	0	0	0
ENSG00000009780.16	ENST00000446647.1	0	0	0	0	0	0	0	0	5.02186	0	0
ENSG00000117758.14	ENST00000373943.9	2.20592	0.824524	0.578963	4.78	6.6939	8.05016	2.4847	2.06366	2.34047	4.24037	3.25558
ENSG00000117751.18	ENST00000311772.10	1.83633	1.46424	1.9278	12.8694	14.498	13.7003	13.9969	15.1263	18.4371	8.47161	9.0411
ENSG00000130775.16	ENST00000373925.5	0.548134	1.63904	0	0.824399	0	0	0	0	0	0	0
ENSG00000130775.16	ENST00000373927.7	0	0	0	0	1.41317	0	0	0	0	0	0
ENSG00000117748.10	ENST00000373912.8	2.30093	4.58703	1.21474	21.3957	29.6744	21.4587	18.1548	11.6165	18.2286	7.20912	1.70177
ENSG00000130768.15	ENST00000373894.8	0	0	0	0	0	0	0.718585	0	0	0	0
ENSG00000130768.15	ENST00000373888.8	0	0	0	0.85401	0	1.91769	0	0	0	0	0
ENSG00000130768.15	ENST00000549094.1	0	0.561992	0	8.99148	14.5431	5.48695	0	5.90763	2.82064	0	0.832121
ENSG00000158156.9	ENST00000675759.1	2.35708	0	0	0	8.62107	5.22372	0	0	3.93055	0	0
ENSG00000158156.9	ENST00000373884.6	0	1.38235	0	9.20152	0	0	4.50208	3.57529	0	2.44882	4.11272
ENSG00000158161.16	ENST00000540618.5	0.272511	0.135811	0.143046	0.984172	0.41347	1.10498	1.02317	0.407898	2.49934	0	0.603273
ENSG00000169403.12	ENST00000373857.8	0	0	0	0.296303	0	0	0	0.307013	0	0.315423	0.302711
ENSG00000126698.11	ENST00000263697.6	6.5982	5.69597	9.58556	12.4003	12.2945	0	11.8991	4.48059	4.77763	0	4.81736
ENSG00000130770.18	ENST00000497986.5	0	20.9307	0	24.576	51.1287	0	0	0	0	0	16.5457
ENSG00000130770.18	ENST00000335514.10	180.091	184.695	207.655	459.095	348.442	324.602	327.621	309.367	339.224	204.258	258.68
ENSG00000130770.18	ENST00000468425.2	2.67007	0	0	3.85977	0	4.29496	0	0	0	0	0
ENSG00000130770.18	ENST00000465645.1	2.22644	7.29221	3.5366	5.30104	5.51243	9.15506	4.17907	6.26953	8.74767	4.4837	2.68524
ENSG00000130766.5	ENST00000253063.4	1.67306	0.23823	1.50557	3.45272	2.90394	1.93828	2.15371	4.05771	3.58704	8.85274	7.76089
ENSG00000130772.14	ENST00000373842.9	2.43018	0.484451	2.55129	2.8085	2.95707	7.09484	4.37967	3.63752	4.86294	8.96919	7.97878
ENSG00000204138.13	ENST00000373839.8	0	0	0.19044	0.50392	0	0	0.254268	1.08923	0.279761	1.22392	1.19261
ENSG00000180198.17	ENST00000398958.6	1.55705	0	0	2.52775	2.63167	15.2547	0	2.53935	0	7.28308	0
ENSG00000180198.17	ENST00000683442.1	0	0	0	0	0	0	4.08588	0	4.44138	0	7.86179
ENSG00000180198.17	ENST00000373832.5	0	0	0.741339	14.936	16.8373	0	20.6136	20.4778	19.4388	16.1758	13.6161
ENSG00000120656.14	ENST00000685589.1	0	0	0	0	0	0	1.08682	0	0	0	0
ENSG00000120656.14	ENST00000689843.1	2.71036	5.40306	2.84543	14.3605	0	27.8414	0	3.77536	0	13.5345	6.5127
ENSG00000120656.14	ENST00000685312.1	0	0	0	0	0	0	9.56693	0	0	0	0
ENSG00000120656.14	ENST00000263974.4	0	0	0	0	0	0	1.84802	4.35778	0	0	2.16004
ENSG00000188060.8	ENST00000373826.3	0	0	0	1.30436	0	0	0	0	0	0	0
ENSG00000188060.8	ENST00000465518.3	0	0	0	0	0	0	12.2396	13.4614	13.5203	14.6763	14.6464
ENSG00000162419.13	ENST00000373816.6	0	0	0.13197	0.908001	0.572184	0	0.755157	0.564474	0.209621	0	0.185521
ENSG00000198492.16	ENST00000373812.8	0	0	0	0	0	0	0	0	0	20.4375	0
ENSG00000198492.16	ENST00000541996.5	4.04176	2.79342	5.22239	14.8488	15.5669	14.6237	15.6586	16.5763	12.9613	0	15.5585
ENSG00000116329.12	ENST00000234961.7	0	0	0	0	0	0	0	0.12676	0.282438	0	0
ENSG00000159023.22	ENST00000647103.1	0	0	0	0.245708	0.274531	0	2.50586	1.06508	3.70979	3.77391	1.84987
ENSG00000159023.22	ENST00000343067.9	0.179159	1.72097	0	0	0	0	0	0	0	0	0
ENSG00000253304.2	ENST00000521452.2	4.72451	0	1.81743	3.40019	1.94212	5.61306	1.03956	0	0	0.718616	0
ENSG00000116350.18	ENST00000373795.7	3.36984	4.4784	3.93079	7.1279	9.53262	7.89468	15.2077	17.3739	6.24365	10.9929	14.0587
ENSG00000116353.16	ENST00000373791.7	0	1.26275	0.973197	0.734715	3.21231	0	2.66108	4.24547	4.1366	5.99463	4.72254
ENSG00000060656.20	ENST00000428026.6	0.289732	0.577577	0.608343	0	1.099	1.40978	5.39712	5.63778	2.17422	4.68041	3.88657
ENSG00000060656.20	ENST00000460170.2	0	0	0	1.09017	0	0	0	0	0	0	0
ENSG00000162511.8	ENST00000294507.4	1.20964	1.98504	2.9271	0	0	0	0	1.19238	0	0	0.587837
ENSG00000162512.16	ENST00000339394.7	0.307359	0.459536	0.484014	0.44401	0.699514	0.249257	0.230801	0.460059	0	0	0.453612
ENSG00000162512.16	ENST00000336798.11	0	0	0	0	0	0	0	0	0	0.576726	0
ENSG00000134644.16	ENST00000424085.6	3.53085	0.698707	1.83981	6.39246	5.16206	4.83411	0	0	0	0	0
ENSG00000134644.16	ENST00000257075.9	0	0	0	0	0	0	7.44655	6.11107	8.26823	0	11.0966
ENSG00000134644.16	ENST00000373747.7	0	0	0	0	0	0	0	0	0	13.3704	0
ENSG00000084628.10	ENST00000373736.7	0	0	0	0	1.3077	0.46597	0	0	0.479077	0	0
ENSG00000060688.13	ENST00000263694.9	0.93009	3.92243	1.18039	13.8189	19.6695	4.28487	24.6172	21.3304	41.2515	19.0196	16.7445
ENSG00000121766.16	ENST00000618216.4	3.09651	1.23457	0	0	15.1783	0	6.55522	5.74839	13.4788	7.61899	3.65649
ENSG00000121766.16	ENST00000616393.4	0	0	0	0	0	0	12.5421	0	0	0	0
ENSG00000121766.16	ENST00000616859.4	0	0	1.33367	0	0	0	0	0	0	0	0
ENSG00000121766.16	ENST00000344147.10	0	0	0	14.2995	0	12.276	0	15.511	6.03052	0	0
ENSG00000121769.8	ENST00000373713.7	3.62234	0	0	0	0	10.2816	0	0	0	0	0
ENSG00000168528.12	ENST00000373709.8	13.9619	25.5176	20.5092	6.04738	4.9636	17.3515	25.5246	20.6677	13.9637	20.8594	19.5373
ENSG00000142910.16	ENST00000457433.6	0	0	0	0	0	0	0	7.62859	6.6165	12.4901	10.1902
ENSG00000142910.16	ENST00000537531.2	2.89423	0	0.506411	1.39367	3.65941	6.25899	10.8666	0	0	0	0
ENSG00000162517.13	ENST00000373703.5	10.1281	8.97211	11.8125	26.918	19.6189	28.2869	33.0234	36.4162	36.6153	20.7638	19.9387
ENSG00000084636.18	ENST00000373672.8	0	0	0	0	0	0	0.223121	0.222375	0	0.913866	0
ENSG00000084636.18	ENST00000373668.7	0	0	0	0	0	0	0	0	0	0	0.333927
ENSG00000184007.22	ENST00000602725.5	4.95522	0	0	0	0	9.35744	0	0	0	0	0
ENSG00000184007.22	ENST00000647444.2	0.964369	4.33566	5.76144	23.7343	25.1794	17.5602	20.0341	18.4454	19.029	19.9175	14.8841
ENSG00000184007.22	ENST00000457805.6	0	5.59792	0	0	0	31.9194	0	0	0	0	0
ENSG00000184007.22	ENST00000602683.5	6.20102	0	0	10.1456	0	0	0	0	0	0	0
ENSG00000121774.18	ENST00000327300.12	5.70441	6.21293	3.93407	0	54.5037	60.6523	37.2896	32.3218	35.595	29.1514	26.7067
ENSG00000025800.14	ENST00000373625.8	0.348415	0.75413	0.937892	1.45167	1.14827	1.31129	1.64098	1.29407	2.34273	2.65903	1.59497
ENSG00000084652.16	ENST00000373610.8	1.33092	1.32657	1.22258	1.6823	2.01957	3.77763	2.49851	3.73528	3.32905	4.09339	2.20995
ENSG00000160050.16	ENST00000373602.10	0	0	0	0	0	8.18483	0	0	0	0	0
ENSG00000160050.16	ENST00000421922.6	0	0	0	0	0	1.97993	0	0	1.09826	0	0
ENSG00000160051.12	ENST00000291358.11	0	0	0	0	0	0	0	0.651989	0	0.669848	0
ENSG00000160055.20	ENST00000344461.7	1.62698	1.62168	0	0	0	7.91655	0	0	0	0	0
ENSG00000160055.20	ENST00000309777.11	0	0	0	5.17183	6.78996	0	6.72094	2.67953	2.98502	4.12917	1.32092
ENSG00000084623.12	ENST00000677760.1	0	4.69739	0	14.1933	0	18.6536	4.65694	13.8123	0	26.2178	31.5826
ENSG00000084623.12	ENST00000676801.1	0	0	0	0	0	0	0.878538	0	0	0	0
ENSG00000084623.12	ENST00000677202.1	0	3.31325	0	27.2219	8.37679	0	6.00558	20.6779	18.2763	0	0
ENSG00000084623.12	ENST00000373586.2	0	0	0	2.98083	0	0	0	0	0	0	0
ENSG00000084623.12	ENST00000677378.1	0	2.80428	0	0	15.4504	22.2047	14.1554	20.0977	12.8829	7.29631	15.6606
ENSG00000084623.12	ENST00000679290.1	2.40801	1.32559	0	6.987	10.6293	0	0	0	0	0	0
ENSG00000084623.12	ENST00000677711.2	6.738	5.30344	8.72934	49.2025	52.6569	41.9472	97.716	67.4245	134.844	77.6647	72.593
ENSG00000084623.12	ENST00000678968.1	0	0	0	0	0	13.3796	0	0	9.59555	0	0
ENSG00000084623.12	ENST00000677198.1	0	0	0	0	0	1.28142	0	0	0	0	0
ENSG00000084623.12	ENST00000678711.1	0	0	0	0	0	0	0	0	0	0	0.497325
ENSG00000084623.12	ENST00000677353.1	2.14725	0	2.91	0	11.6105	18.6145	0	0	0	0	0
ENSG00000183615.6	ENST00000373582.4	0	6.57966	2.31005	0	0	0	1.65231	0	0	3.38379	0
ENSG00000182866.17	ENST00000336890.10	0	0	0.43768	0	0	0	1.25224	0	0	0.64112	1.23056
ENSG00000116478.12	ENST00000373548.8	3.28704	2.04771	3.0195	47.9489	45.3229	52.2849	43.3448	39.853	38.4183	36.147	31.1215
ENSG00000175130.7	ENST00000329421.8	2.44497	5.31141	2.48637	150.6	138.346	127.723	190.904	184.692	194.913	133.269	131.599
ENSG00000225828.2	ENST00000432622.2	1.10973	0	0	0	0	0	0	3.32213	0	0	0
ENSG00000160058.19	ENST00000455895.7	0	0	0	0	0	0	0	0	0	2.53619	0
ENSG00000160058.19	ENST00000341071.11	0	0	0	0	0	0	0	0	0	0.547865	0.887965
ENSG00000160062.15	ENST00000373510.9	0.224946	0.112102	0.118074	0.162472	0	0.182416	0	0	0	0	0
ENSG00000160062.15	ENST00000316459.4	0	0	0	0	0	0	0	1.35709	0	0	0.669037
ENSG00000176261.16	ENST00000468695.6	0.708004	0	3.29809	5.65267	6.11021	4.94645	3.68552	2.41347	2.69069	2.2659	3.34429
ENSG00000176261.16	ENST00000373501.6	0	0	0	76.996	58.9712	91.9549	74.1189	0	0	56.4202	59.1236
ENSG00000176261.16	ENST00000436661.6	0	9.93367	8.54445	0	0	0	0	27.1109	45.5142	0	17.6169
ENSG00000162521.19	ENST00000373493.10	1.50891	1.40373	1.69989	6.54216	4.73145	4.29944	7.58825	6.8753	12.3528	8.51682	7.57691
ENSG00000162520.15	ENST00000409190.8	0	0	1.95821	0	0	6.7553	1.75543	2.36101	0.566377	1.80062	1.38755
ENSG00000162522.11	ENST00000401073.7	0	0	0	5.08213	5.77747	0	5.27832	0	0	3.61419	3.25358
ENSG00000162522.11	ENST00000373481.7	0.152247	0.303503	0.160767	0	0	10.8651	0	0	3.0467	0	0
ENSG00000162522.11	ENST00000373480.1	0	0	0	0	0	0	0	3.83429	0	0	0
ENSG00000134684.13	ENST00000373477.9	1.01435	3.13988	5.14443	8.18149	4.64619	0	29.9384	16.3544	20.0172	58.0172	47.0274
ENSG00000116497.18	ENST00000373475.10	0.193386	0	0.406047	0.55873	0.913852	0.315295	1.16219	1.15785	3.22594	0.595028	0.856219
ENSG00000160097.20	ENST00000649537.2	0	2.13594	0	0	0	0	0	0	0	0	0
ENSG00000160097.20	ENST00000496770.1	0	0	0	0	0	0	1.96142	0	0	0	0
ENSG00000121900.19	ENST00000329151.5	0	0	0	0	0	0	0	7.392	6.1764	1.89862	0
ENSG00000121900.19	ENST00000373463.8	1.96654	2.94021	0	9.94304	11.935	20.7324	5.90685	0	0	0	0
ENSG00000116514.17	ENST00000373456.11	0.664606	1.32485	0.348856	1.92014	2.52089	3.77272	8.98297	3.55624	6.64945	3.06606	6.14422
ENSG00000004455.18	ENST00000373449.7	0	0	0	5.62091	0	0	0	0	5.53585	4.05945	0
ENSG00000004455.18	ENST00000672715.1	1.50517	3.16167	2.90749	0	6.11729	3.6356	5.39719	2.85858	0	2.89237	6.43784
ENSG00000004455.18	ENST00000480134.5	4.85212	0	5.17631	0	5.83894	7.88536	0	0	0	0	0
ENSG00000004455.18	ENST00000487289.1	0	0	0	0	0	0	1.83505	0	0	3.51995	0
ENSG00000116525.14	ENST00000291416.10	0	0	0	0	0.326558	0	0	0	0	0.330982	0.635285
ENSG00000160094.15	ENST00000373428.5	0.571593	0	0.900118	0.825723	0.433628	0.927085	1.28766	2.56686	2.86819	2.63701	0.843579
ENSG00000134686.20	ENST00000373418.7	3.032	0	0	0	0	0	0	0	30.2026	34.8532	39.081
ENSG00000134686.20	ENST00000431992.6	0	0	0	0	0	0	0	0	0	0	0.619179
ENSG00000121903.15	ENST00000361328.7	0	0	0	0	0	0	0	0	0.314866	0.290369	0
ENSG00000121903.15	ENST00000684572.1	0	0	0	0	0.253103	0.135282	0	0.124846	1e-06	1e-06	0.123096
ENSG00000163866.9	ENST00000521580.3	0.22415	0	0.234438	1.1528	0.834154	0.368977	0.337997	1.67702	0.39439	1.06829	0
ENSG00000163866.9	ENST00000446026.1	2.41451	1.9878	2.77265	0	1.49905	2.95294	3.32451	0	1.65382	2.92125	0.535256
ENSG00000163866.9	ENST00000456842.1	2.68201	17.541	15.3891	34.3979	28.9594	17.3123	36.4851	36.0677	34.6092	10.1008	21.6627
ENSG00000188910.8	ENST00000373362.3	0	0	0.520805	0	0	0	0	0	0	0	0
ENSG00000187513.9	ENST00000342280.5	1.11946	0.557896	1.76284	0	0	0	0	0	0	0	0
ENSG00000116544.12	ENST00000235180.4	0	0	0	0.332342	0	0	0	0	0	0	0
ENSG00000243749.1	ENST00000373337.3	11.4415	15.9228	7.38511	3.52179	10.3877	22.2087	13.7179	5.12388	24.7544	21.0569	8.42013
ENSG00000163867.17	ENST00000357182.9	0.333393	0	0	0.227654	0.478439	1.5336	0.236674	0	0	0.242344	0.465189
ENSG00000197056.11	ENST00000359858.9	0	0	0	0	0	0	0	0.881485	0	0	0
ENSG00000116560.12	ENST00000357214.6	2.87921	2.19259	4.15693	38.7137	34.0752	40.6062	35.0304	25.9191	22.4141	23.9749	16.8739
ENSG00000146463.12	ENST00000314607.11	0	0	0	1.247	0	0	2.59295	0.969051	1.79932	0.995596	1.14677
ENSG00000146463.12	ENST00000457946.1	1.06769	0.798158	0.420337	0	1.82246	1.51525	0	0	0	0	0
ENSG00000142687.18	ENST00000325722.8	1.86557	1.01427	1.60244	1.96	3.16853	2.75075	4.58472	3.60267	3.96687	4.17294	5.2661
ENSG00000020129.16	ENST00000356090.8	0	0.4808	0	2.43892	2.19565	1.17356	2.17333	2.88808	2.81533	4.07989	3.20377
ENSG00000020129.16	ENST00000423723.1	0	0	0	0	0	1.69001	0	0	0	0	0
ENSG00000116819.9	ENST00000373235.4	0	0	0	0	0	0	0	0.57588	0	0	0
ENSG00000126067.12	ENST00000373237.4	4.29512	7.96479	6.40195	60.3082	52.5638	46.2282	50.2296	46.7242	35.312	31.4164	20.9502
ENSG00000142686.8	ENST00000270815.5	0.322798	0	0	0.932732	0.489768	2.09422	0.484789	0	0	0	0
ENSG00000092853.14	ENST00000251195.9	0	0	0	0	0	0	0	0.651408	0	0	0
ENSG00000092853.14	ENST00000318121.8	0	0	0	0.939793	0.283488	0.301474	0.296702	0.478322	0	0	0
ENSG00000092853.14	ENST00000373220.7	0	0	0	0	0	0	0	0	0	0	0.304009
ENSG00000092853.14	ENST00000520551.1	0	0	0	0	0	0	0	0	0.340486	0	0
ENSG00000134698.11	ENST00000373210.4	0.218692	0.326969	0.45918	0.315922	0.497718	0.177351	0.492658	0.491011	0.36468	0.504461	0.807451
ENSG00000092847.13	ENST00000674304.1	0	0.317601	0.222985	1.29951	0.542907	0	0.479195	0.359089	0	0.874668	0.528086
ENSG00000092847.13	ENST00000373204.6	0.085561	1.5e-05	1.7e-05	0.063114	0.070605	0.693867	2.2e-05	0.074351	0.190236	2.1e-05	0.068677
ENSG00000092847.13	ENST00000674426.1	0.085561	1.5e-05	1.7e-05	0.063114	0.070605	0.693867	2.2e-05	0.074351	0.190236	2.1e-05	0.068677
ENSG00000126070.20	ENST00000324350.9	0	0	0	0	0	0.843289	0	0	0	0	0
ENSG00000126070.20	ENST00000397828.3	0	0	0	0	1.48192	0	1.46687	1.35446	4.71483	0	0
ENSG00000126070.20	ENST00000373191.9	0.118686	0.078866	0.083067	0.114302	8.9e-05	0	1.8e-05	0.074203	0.163422	0.070777	6.7e-05
ENSG00000126070.20	ENST00000246314.10	0	0	0	0	0.392911	0	0	1.09464	2.00195	1.13096	0.382189
ENSG00000116863.11	ENST00000373178.5	4.38224	2.18383	2.30016	8.70627	2.76579	8.88401	6.72524	14.8867	12.3321	8.60931	8.89218
ENSG00000171812.13	ENST00000303143.9	0	0	0	0	0.277551	0	0.274729	0	0	0	0
ENSG00000171812.13	ENST00000481785.1	0	0	0	0	0	0	0	0	0	0	0.634219
ENSG00000054116.12	ENST00000616074.4	11.0726	0	0	0	0	0	0	0	0	0	0
ENSG00000054116.12	ENST00000373166.8	3.3669	14.255	7.80451	53.3137	43.1359	41.2656	55.6472	50.5007	51.0031	25.3742	35.1915
ENSG00000054116.12	ENST00000373163.5	0	0	0	0	0	5.92774	0	28.146	18.0184	28.2695	0
ENSG00000054116.12	ENST00000373162.5	0	0	0	0	2.10663	0	0	0	0	0	13.8632
ENSG00000116871.16	ENST00000373150.8	0	0	0	0.629633	0	0.682251	1.45929	0.632021	0	0	2.28573
ENSG00000054118.15	ENST00000648638.1	0.858988	0	0	0	0	0	0	0	0	0	0
ENSG00000054118.15	ENST00000354618.10	0	1.47606	1.38803	3.15561	3.92929	4.79514	4.44009	6.91444	4.00564	3.97815	6.05654
ENSG00000214193.11	ENST00000453908.8	0	0	0	0	0	0	0.774191	0	0.557984	0	0
ENSG00000214193.11	ENST00000505871.7	0	0	0	0	0.223358	0	0	0.72571	1.28813	0.569524	1.34749
ENSG00000142694.7	ENST00000490466.2	8.40422	6.28263	0	9.10554	22.1663	13.6706	6.31088	2.20049	10.9722	17.2662	20.4955
ENSG00000196182.11	ENST00000359297.6	0	0	0	0	0	0	0	0	0	0.678818	0
ENSG00000196182.11	ENST00000373130.7	0.681801	0.906106	2.14734	4.92465	0	6.6581	0	18.7108	13.2643	16.9025	14.7666
ENSG00000196182.11	ENST00000373132.4	0	0	0	0	7.00967	0	17.7932	0	0	0	0
ENSG00000181817.6	ENST00000315732.3	15.0822	6.26377	3.99842	39.8899	38.222	42.809	40.3638	39.5067	46.109	50.5918	51.3956
ENSG00000116885.18	ENST00000433045.6	0	0.676178	0	0	0	0	0	0	0	0	0
ENSG00000116885.18	ENST00000354267.3	0	0	0	2.14162	2.24934	2.40451	0	0	0	0	0
ENSG00000116898.12	ENST00000373116.6	53.1361	63.7773	26.3425	132.554	133.45	95.5384	135.75	141.972	175.966	117.363	111.96
ENSG00000119535.18	ENST00000373106.6	0	0	0	0	0	0	0	0	0	5.56443	6.97792
ENSG00000119535.18	ENST00000373103.5	0	0	0	0	0	0	0	0	3.12268	0	0
ENSG00000119535.18	ENST00000361632.8	0.295587	0	0	0	0	0	0.887847	1.76976	0	0	0
ENSG00000119535.18	ENST00000464465.6	0	1.92804	0	2.79435	5.86981	0	0	0	0	0	0
ENSG00000163873.10	ENST00000373091.8	0	0	0.087233	0	0	0	0	0	0	0	0
ENSG00000163874.11	ENST00000373087.7	0.638616	0	0.335221	1.84509	0.968946	2.07158	3.12485	3.20646	2.66231	3.43726	0.942494
ENSG00000163875.16	ENST00000296214.10	0	0	0	0	0	0.416689	0	0	0	0	0
ENSG00000163875.16	ENST00000373075.6	0	2.02853	0	1.1423	1.19476	4.55403	6.03758	0	1.28919	0	0
ENSG00000163877.11	ENST00000296215.8	0.178382	0	0.187272	1.03076	0.811956	1.73594	1.3395	0.53401	2.08223	2.19455	2.10611
ENSG00000163879.11	ENST00000652629.1	0.968393	0.643492	0.338884	0.470978	0	0.523555	0	0	0	0	0
ENSG00000134697.13	ENST00000373062.8	1.09653	2.91457	1.15118	9.32181	6.07572	1.92501	11.2512	13.1308	17.0662	10.179	12.815
ENSG00000116922.15	ENST00000358011.8	0.729283	0	0.382814	3.32363	4.42605	2.96024	4.93078	2.1832	9.12089	6.16842	3.76707
ENSG00000134690.11	ENST00000327331.2	0	0	0	16.2139	17.5851	10.9151	8.98427	6.1558	18.0801	3.44969	1.65533
ENSG00000185090.15	ENST00000373045.11	0	0	0	0	0	0	2.57514	0	14.4607	5.99729	6.66995
ENSG00000185090.15	ENST00000397631.7	0	0	2.32783	0	5.0464	0	10.9156	14.428	0	0	0
ENSG00000185090.15	ENST00000329006.5	2.28416	0.910688	0	4.61958	0	7.40951	0	0	0	0	0
ENSG00000196449.4	ENST00000373044.3	0.960519	1.91478	1.02657	17.4432	16.3757	17.1369	23.1756	28.9976	24.8379	35.1118	29.9568
ENSG00000197982.14	ENST00000468084.1	0	23.4623	0	43.8841	38.7908	65.6759	46.3688	24.4005	40.1813	0	31.1224
ENSG00000197982.14	ENST00000373042.5	9.95799	0	21.6212	0	8.03893	0	35.5609	40.8977	25.0467	88.6591	37.667
ENSG00000188786.10	ENST00000373036.5	0	0	0	0.432892	0	1.78629	0.150191	0.299583	0.166568	0.615391	0.589672
ENSG00000204084.13	ENST00000373027.5	0	0.209364	0.232435	0	0.637395	0.355964	0	0	0	0.64603	0.309997
ENSG00000204084.13	ENST00000373026.5	0	0	0	0	0	0	0.386888	0	0	0	0
ENSG00000183431.12	ENST00000373019.5	1.52066	2.45142	2.8736	15.9459	22.1523	20.7179	21.641	27.4206	19.2747	21.0491	22.5208
ENSG00000183520.12	ENST00000373014.5	3.46307	3.02031	2.7269	11.8689	14.135	20.3611	13.5344	14.2577	12.2716	10.7624	17.0205
ENSG00000116954.8	ENST00000373001.4	1.89458	1.57367	0.994498	5.05745	2.87457	8.70647	5.21647	2.36319	5.79207	4.37137	1.77332
ENSG00000214114.9	ENST00000397572.5	1.21847	2.6822	1.41254	6.40886	6.39382	6.49541	8.25169	8.3202	8.7715	8.75492	4.19887
ENSG00000214114.9	ENST00000494695.4	0	0	0	0	15.1119	0	0	12.4072	0	14.3198	0
ENSG00000274944.4	ENST00000621281.1	5.07181	0	0	17.9066	32.286	31.4646	6.03715	23.5578	19.1018	0	11.1505
ENSG00000158315.11	ENST00000372990.6	0	0	0	0	0	0	0.705822	0.703462	0.783704	0	0
ENSG00000158315.11	ENST00000540558.1	0	0	0	0	0	0	0	0	0	2.63603	2.5298
ENSG00000174574.16	ENST00000432648.8	0.94457	2.82448	3.63603	16.2782	21.1138	21.9591	39.7288	38.2431	55.3683	40.7062	40.8018
ENSG00000168653.11	ENST00000372967.3	0	0	0	0	0	0	11.5421	0	0	0	0
ENSG00000168653.11	ENST00000372969.8	213.941	241.223	219.39	720.601	845.332	923.057	967.823	1038.65	1188.56	563.628	525.48
ENSG00000127603.32	ENST00000361689.7	2.9e-05	6.1e-05	3e-06	0.000172	6.4e-05	3.7e-05	0.00016	0.000182	0.000196	0.000174	0.000172
ENSG00000127603.32	ENST00000567887.5	5.9e-05	8.4e-05	3.4e-05	0.0005	7.1e-05	0.00016	0.000303	0.000349	0.000436	0.0004	0.00028
ENSG00000127603.32	ENST00000372915.8	4e-05	0.000152	1.9e-05	0.000443	0.000161	3.9e-05	0.000358	0.000261	0.000116	0.000106	0.000262
ENSG00000127603.32	ENST00000564288.6	6.7e-05	5.3e-05	5.7e-05	0.000581	9.6e-05	0.000107	0.000327	0.000401	0.000437	0.000401	0.00024
ENSG00000127603.32	ENST00000602528.2	0	0	0.866422	0	0	0	0	0	0	0	0
ENSG00000127603.32	ENST00000671089.2	4.2e-05	5.8e-05	2.1e-05	0.000111	5.6e-05	3.8e-05	0.000151	0.233977	0.000163	0.000156	0.420016
ENSG00000127603.32	ENST00000372925.6	1.4e-05	2.8e-05	2e-06	1.5e-05	2.4e-05	2.4e-05	5.8e-05	0.562104	0.245358	0.147858	0.412346
ENSG00000127603.32	ENST00000530275.3	0	0	0	0	0	0	0.255527	0	0	0	0
ENSG00000127603.32	ENST00000360115.8	0	0.743774	0	1.31805	1.42482	1.51163	1.04916	1.20887	0	0.757135	1.06887
ENSG00000127603.32	ENST00000446276.5	1.18692	0	0.834736	0	2.60166	0	0	0	0	0	0
ENSG00000127603.32	ENST00000442046.5	0	0	0	2.04627	0	3.6071	0	0	0	0.722316	0
ENSG00000183682.8	ENST00000331593.6	0	0	0	0.82373	0.216291	0.263485	0	0	0	0	0
ENSG00000090621.15	ENST00000676859.1	0	0	0	0	5.805	0	0	0	0	0	4.03972
ENSG00000090621.15	ENST00000527718.2	4.74092	1.70231	0	0	0	14.0893	0	0	0	4.50021	0
ENSG00000090621.15	ENST00000372862.7	1.03417	0	0	0	0	0	0	0	0	3.43919	0
ENSG00000090621.15	ENST00000372857.7	0	0	0	2.79448	0	0	3.30272	0	4.53278	0	2.94538
ENSG00000090621.15	ENST00000372856.7	0	0	0	0	0	0	3.06703	2.05795	0	0	0
ENSG00000090621.15	ENST00000372858.8	0.703886	3.00744	1.20364	12.6824	14.1619	9.81464	16.5437	22.2572	21.9344	16.7447	11.0345
ENSG00000163909.8	ENST00000372852.4	0.20061	0.399913	0.210608	0	0.304378	0	0	0	0.334528	0	0
ENSG00000084072.17	ENST00000324379.10	0	0	0.243709	0.334534	0.338895	0.361973	0	0	0	0	0
ENSG00000084072.17	ENST00000356511.6	0.925223	1.96921	2.09103	0	0	0	0	0	1.65487	3.44648	0
ENSG00000084072.17	ENST00000372830.5	0	0	0	7.38234	0	0	0	1.21123	0	0	0
ENSG00000116985.12	ENST00000372827.8	0	0	0	0.72713	0.763704	2.41123	0	0.251138	1.11914	0.258017	0
ENSG00000198754.5	ENST00000327582.5	0	0	0	0	0	0	0.731334	0	0	0	0
ENSG00000043514.17	ENST00000441669.6	0.958721	0.955597	0	2.07745	3.63657	4.66494	0	5.02259	1.59872	0	0
ENSG00000116990.11	ENST00000397332.2	0.510765	0	0.26811	0	0.387482	0	0	0	0	0	1.13071
ENSG00000116990.11	ENST00000372815.1	0	0	0	0	0	0.734831	0	0	0	0.696721	0
ENSG00000168389.18	ENST00000420632.6	7.88282	9.1973	21.7585	1.33256	0	0	0	0	0	0	0
ENSG00000131236.18	ENST00000372792.7	0	0	9.48478	0	0	0	0	0	0	0	0
ENSG00000131236.18	ENST00000372805.8	0	0	0	24.9281	68.0309	0	26.8823	0	0	0	0
ENSG00000131236.18	ENST00000340450.7	8.84969	6.87678	0	41.8386	0	71.766	43.9127	79.2475	66.3811	51.3902	41.282
ENSG00000131238.18	ENST00000641471.1	0	0	0	10.8106	0	6.59628	0	0	11.9293	0	2.39194
ENSG00000131238.18	ENST00000530076.6	3.32463	1.81658	0	2.51378	8.30594	0	0	0	0	0	0
ENSG00000131238.18	ENST00000642050.2	0	0	1.9521	2.5926	13.4557	8.92091	36.9021	43.3087	44.6815	30.4101	22.152
ENSG00000131238.18	ENST00000641083.1	0	0	0	0	0	0	0	5.29498	0	0	0
ENSG00000131238.18	ENST00000433473.8	0	0.81481	0	0	0	0	0	0	0	0	11.655
ENSG00000117000.9	ENST00000372771.5	0.256706	0.127935	0	0.556255	0.389489	1.0409	0.578604	0.576361	0.856141	1.1843	0.757713
ENSG00000084073.10	ENST00000372759.4	4.78905	3.08869	3.27294	11.0635	13.2818	13.0545	8.88651	10.3331	13.0931	11.2649	8.67043
ENSG00000049089.15	ENST00000372748.8	0	0	0	0.853827	2.23811	1.914	3.54456	3.63122	3.93568	2.72229	3.04781
ENSG00000084070.12	ENST00000372718.8	1.30892	0	0	0	2.07783	0	0	5.6261	8.85644	9.78191	8.53425
ENSG00000084070.12	ENST00000372708.5	4.65214	5.50671	3.26949	4.98812	5.90182	6.16049	4.66718	0	0	0	0
ENSG00000187801.15	ENST00000484445.5	0	0	0	0	0	0	0	2.03184	0.741501	2.63804	0
ENSG00000187815.10	ENST00000372706.6	0	0	0	0	0	0	1.8118	0.451387	0.502777	0.927321	0
ENSG00000187815.10	ENST00000372705.3	0.413981	0	0.434612	0	0	0	0	0	0	0	0
ENSG00000164002.12	ENST00000296380.9	0	0	0	2.2984	0	0	5.57541	0	2.4684	0	0
ENSG00000164002.12	ENST00000682383.1	0	0	0	0	0	0	0	0	4.04999	0	0
ENSG00000164002.12	ENST00000432259.6	0	0	0	0	0	0	0	1.41124	0	0	1.39147
ENSG00000164002.12	ENST00000418186.2	0	0	0	0	0	1.81038	0	0	0	0	0
ENSG00000164002.12	ENST00000443729.6	0	0	1.11818	0	0	0	0	0	0	0	0
ENSG00000117010.17	ENST00000372699.8	1.30158	1.29734	0	0.626756	0	0.703694	1.95477	0	1.44697	2.0016	1.28062
ENSG00000117010.17	ENST00000372696.3	0	1.00715	0	0	1.5331	0	0	0	5.05489	0	0
ENSG00000117016.10	ENST00000372684.8	0	0	0	0	0	0	0	0	0	0.336931	0
ENSG00000117016.10	ENST00000372683.1	0	0	0	0	0	0	0	1.98353	1.10489	0	0
ENSG00000066136.21	ENST00000447388.8	0	0	0	2.70558	0	9.4912	12.4834	0	10.4221	0	0
ENSG00000066136.21	ENST00000425457.6	0	0	1.45626	0	0	0	0	0	0	0	0
ENSG00000066136.21	ENST00000456393.6	2.31027	0	0.812643	3.23015	8.66216	0	0	7.60662	0	15.8611	0
ENSG00000066136.21	ENST00000372654.5	0	0.840609	0	0	0	0	0	0	0	0	0
ENSG00000066136.21	ENST00000372652.5	0	1.33084	0	0	0	0	2.98312	0	0	0	9.91426
ENSG00000066136.21	ENST00000308733.9	0	0	0	0	2.2242	0	0	0	6.11758	0	0
ENSG00000179862.7	ENST00000372638.4	12.526	2.89637	6.83869	2.09116	5.49085	2.34786	17.5847	19.8082	22.932	31.1653	28.9725
ENSG00000171793.17	ENST00000650070.2	0.737135	0	1.14966	8.36214	9.60143	5.32297	11.8125	17.0969	7.39727	5.92522	6.9999
ENSG00000171793.17	ENST00000649864.1	0	0	0	0	0	0	0.280925	0	0	0	0
ENSG00000171793.17	ENST00000463285.7	0	0.542861	0	0	0	0	0	0	0	0	0
ENSG00000171793.17	ENST00000649124.2	0	0.843298	0.996437	5.26031	1.86222	3.81216	0	0	0	0	0
ENSG00000171793.17	ENST00000470271.6	0	0	0	0.805964	3.26681	4.87322	0	0	0	0	0
ENSG00000171793.17	ENST00000649215.1	0	0	0	0	1.48013	0	0	0	0	0	0
ENSG00000171790.16	ENST00000359345.5	0	0	0	0	0	0	0	0	0	0.872403	0
ENSG00000010803.17	ENST00000372595.5	0	0	0	0	2.73511	0	1.54757	3.46918	0	0	0
ENSG00000010803.17	ENST00000337495.9	0.268603	0	0.563978	1.94012	0	0	0	0	2.846	7.02205	7.92829
ENSG00000010803.17	ENST00000372597.5	0	0	0	0	0	2.61192	0	0	0	0	0
ENSG00000010803.17	ENST00000695335.1	0	0	0	0	0	0	0	0	3.95785	0	0
ENSG00000010803.17	ENST00000472037.5	0	0	0	0	0	4.36359	0	0	0	0	0
ENSG00000044012.4	ENST00000372581.2	2.1632	2.15615	0	0	0	0	0	0	0	0	0
ENSG00000197273.4	ENST00000357001.3	0	0	0	0	0	3.57913	0	0	0	0	0
ENSG00000198815.9	ENST00000372571.5	0.364037	0.362851	0.191089	1.31498	0.828507	0	0	1.08979	0.60705	0	0
ENSG00000198815.9	ENST00000372573.5	0	0	0	0	0	0	0	0	0	0	0.895928
ENSG00000198815.9	ENST00000361776.5	0	0	0	0	0	2.56442	1.42472	0	0	1.73607	0
ENSG00000177181.15	ENST00000431473.4	0	0	0	0	0	0	0.670011	0.668498	0.619952	0	0.219471
ENSG00000127125.9	ENST00000372561.4	0.507699	1.69902	1.10861	0	0	0	0	0	0	0	0
ENSG00000127125.9	ENST00000372556.3	19.5263	32.8301	28.1619	12.4826	0	33.7364	0	0	0	0	0
ENSG00000186409.19	ENST00000655845.1	0	0	0	0	0	0	0	0	0.883154	0	0
ENSG00000171960.12	ENST00000677900.1	0	0	0	0	0	0	3.39719	0	0	0	0
ENSG00000171960.12	ENST00000372550.6	0	0	0	3.23968	2.70271	0	0	0	0	0	0
ENSG00000171960.12	ENST00000676675.1	0	0	0	0.869284	0.901226	1.64488	0	1.63355	3.71878	0	0
ENSG00000171960.12	ENST00000304979.8	0	0	1.59645	33.0724	46.1426	40.539	38.4515	46.4933	57.8364	0	8.97702
ENSG00000171960.12	ENST00000678333.1	0	0	0	0	1.53958	0	0	0	0	0	0
ENSG00000171960.12	ENST00000677356.1	0	0	0	0	0	0	0	0	9.04168	0	0
ENSG00000065978.19	ENST00000321358.12	3.61257	17.3498	6.00709	92.8707	64.0954	26.3799	272.683	251.792	328.697	195.665	177.599
ENSG00000065978.19	ENST00000436427.1	26.9359	42.0958	47.0606	236.879	346.697	348.877	24.5072	43.454	31.316	0	9.40774
ENSG00000164007.11	ENST00000539749.5	0	0	0	0	0	0	0	0	1.17556	0	0
ENSG00000164007.11	ENST00000372539.3	0	0	0	0	0.871472	0	0	2.57988	0	0.883278	0.847681
ENSG00000117385.16	ENST00000397054.7	0	0	0	0	0	0	0	0	0	0	14.7668
ENSG00000117385.16	ENST00000296388.10	0	1.63414	0.344238	6.59868	10.6061	5.00931	21.647	15.3944	17.3386	0	0
ENSG00000117385.16	ENST00000236040.8	0.839594	0	0	2.04945	0	0	6.29179	2.39831	2.0949	12.8921	0
ENSG00000117385.16	ENST00000372526.2	0	0	0	0	0	0	0	28.568	0	0	0
ENSG00000164008.17	ENST00000372525.7	0	0	0	0	0	0	0	0.290751	0	0.312125	0.919848
ENSG00000177868.12	ENST00000372521.9	6.88114	5.48698	5.40268	9.94049	18.8237	17.8572	39.2958	34.7247	41.3148	27.9216	42.6451
ENSG00000164010.15	ENST00000645239.1	0	0	0	0	0	0	0	6.88297	0	0	0
ENSG00000164010.15	ENST00000372514.7	0	0	0	0	0	0	0	0	1.23132	0	0
ENSG00000164011.18	ENST00000372508.7	0.581092	0.576381	0	0.83536	1.75476	3.75162	0	0	0	2.66779	0
ENSG00000164011.18	ENST00000651192.1	0	0	0	0	0	0	4.25839	0	0	0	0
ENSG00000164011.18	ENST00000372507.5	0	0	0	0	0	0	0	0.801574	4.46504	0	1.58068
ENSG00000164011.18	ENST00000630961.1	0	0	2.02937	0	0	0	0	0	0	0	0
ENSG00000117394.24	ENST00000426263.10	0	0	0	0.837813	0	0	18.1098	26.7504	12.6506	10.369	11.5982
ENSG00000117394.24	ENST00000460369.3	0	0	0	0	0	0	13.4265	7.87299	0	4.04432	7.93211
ENSG00000186973.11	ENST00000410048.5	0	0	0	0	4.64206	9.92461	0	4.57951	10.2038	0	0
ENSG00000117395.13	ENST00000236051.3	4.17734	1.637	3.65674	37.9639	40.1327	54.2559	51.8261	49.4543	47.237	46.986	53.1186
ENSG00000253313.6	ENST00000523677.6	1.24161	0.618782	0	0	0.941922	1.0069	0	1.85846	2.07045	2.86405	1.83241
ENSG00000066056.14	ENST00000372476.8	0	1.05027	0.221242	0	0	0	0	0	0	0	0.311018
ENSG00000117399.14	ENST00000310955.11	0	0	0	52.8639	71.5509	47.5762	33.7127	32.7661	64.4363	3.37412	7.41932
ENSG00000066322.15	ENST00000413844.3	3.83341	6.368	3.3536	0	0	52.3538	0	0	0	28.492	0
ENSG00000066322.15	ENST00000372458.8	0	0	0	43.8858	44.9221	0	32.8184	27.9184	27.2876	0	29.3259
ENSG00000159479.17	ENST00000372457.9	0	5.34334	3.75198	5.53729	20.3383	28.2583	11.8148	11.686	14.6689	17.1768	8.67815
ENSG00000159479.17	ENST00000372455.4	1.63914	0	0	17.0831	11.2571	0	21.4331	28.4824	33.4124	0	16.9591
ENSG00000198198.17	ENST00000372450.8	0	0	0	0	0	1.32223	0	1.22023	0	0	0
ENSG00000198198.17	ENST00000562955.2	1e-05	1.1e-05	1e-06	1.5e-05	2.5e-05	2e-05	0.336219	1.5e-05	3.3e-05	0.086015	0.165171
ENSG00000198198.17	ENST00000634258.3	1e-05	1.1e-05	1e-06	1.7e-05	2.8e-05	2.2e-05	4.8e-05	1.6e-05	3.5e-05	6.5e-05	5.2e-05
ENSG00000178922.18	ENST00000372430.9	0	7.64533	0	17.8463	0	0	1.18654	0	0	0	0
ENSG00000178922.18	ENST00000583037.5	0	8.02612	0	0	0	0	0	0	0	0	0
ENSG00000178922.18	ENST00000372433.5	12.7473	0	0	0	0	0	0	0	0	0	0
ENSG00000178922.18	ENST00000372434.5	3.7454	0	10.0141	13.3505	6.84783	49.2884	0	0	0	0	0
ENSG00000178922.18	ENST00000372432.5	0	0	5.29021	0	18.132	35.8931	0	0	0	0	0
ENSG00000142949.17	ENST00000359947.9	0	0.442328	0	0	0	0	2.54595	2.91843	0.564966	5.30208	4.12863
ENSG00000142949.17	ENST00000429895.5	0.785032	0	0	0	0	0	0	0	0	6.52669	6.91674
ENSG00000142949.17	ENST00000372407.4	5.59707	4.16628	5.91781	12.4934	14.5786	20.442	9.68491	8.20067	7.95553	0	0
ENSG00000066135.13	ENST00000372396.4	0.543735	0.722618	0.570833	1.83279	3.84994	4.11554	1.9054	1.89903	1.51118	2.78722	1.87242
ENSG00000126091.21	ENST00000361400.9	0	0	0	0	0	0	0	0	0	0	1.15471
ENSG00000126091.21	ENST00000545417.5	0.776339	0	0.568551	0	0	0	0	0	0	0	0
ENSG00000126091.21	ENST00000330208.6	2.22669	0	0	0	0	0	0	0	0	0	0
ENSG00000126091.21	ENST00000642331.1	0	0	0	0	0	0	0	0	1.44231	0	0
ENSG00000126091.21	ENST00000347631.8	0	0	0	0	0	0	2.44282	0	2.22222	1.767	0
ENSG00000126091.21	ENST00000361392.9	0	0	0	1.71281	0	0	0	0	0	0	0
ENSG00000126091.21	ENST00000646971.1	0	0	0	0.745901	0	0	0	0	0	0	0
ENSG00000126091.21	ENST00000484868.2	0	0	0	0	0	0	0	0	0	1.46883	0
ENSG00000126091.21	ENST00000361746.9	0	0	0	0	1.17693	0.796925	0	0	0	0	0
ENSG00000126091.21	ENST00000533933.6	0	0	0	0	1.46101	0	0	0	0	0	0
ENSG00000117407.17	ENST00000498139.6	0	0	0	0	1.10546	0	0	0	0	1.12044	0
ENSG00000117407.17	ENST00000438616.3	0	0	0	0	0	0	1.80205	0	0	0	0
ENSG00000117408.11	ENST00000372343.8	0.422639	0.842524	0.665553	1.52636	2.56501	4.15645	4.44314	0.948918	2.81909	2.15781	4.36623
ENSG00000117408.11	ENST00000372339.3	0	0	0	0	0	0	0	0	0	1.68705	0
ENSG00000132768.14	ENST00000255108.8	0	0	0	0	0	0	0	0	0	0	4.60094
ENSG00000132768.14	ENST00000396758.6	0	0	0.541441	0	0	4.39754	0	0	0	0	0
ENSG00000117410.14	ENST00000532642.5	0	0	0.73411	1.04333	0	0	0	1.14507	1.25503	0	0
ENSG00000117410.14	ENST00000236067.8	32.0483	40.8526	33.3618	194.381	210.091	254.844	138.356	183.057	186.362	205.276	130.491
ENSG00000117410.14	ENST00000472174.7	0	0	0	0	0	16.533	0	0	0	0	40.8586
ENSG00000117411.18	ENST00000372324.6	0	0	0	0	0	0	13.2724	0	0	0	0
ENSG00000117411.18	ENST00000481924.2	0	0.239647	0	0	0	0.779924	0.367074	0	0.400931	0.369738	0
ENSG00000117411.18	ENST00000356836.10	0	0	0	0	1.34387	0	1.17441	0	3.20311	2.85738	7.31014
ENSG00000117411.18	ENST00000309519.8	0	0	0	0	9.46408	0	0	18.4697	0	0	5.70651
ENSG00000159214.13	ENST00000372318.8	0	1.25173	0	0	0	0	0	0	1.04707	0	0
ENSG00000196517.13	ENST00000372310.8	0	0	0	0	0	0	0	0	0	0	6.9468
ENSG00000196517.13	ENST00000673836.1	0	0	0.280908	0	0.405978	0.867971	2.81296	1.60203	2.67716	12.5492	0
ENSG00000178028.14	ENST00000361745.10	1.94751	0	0.826824	5.99742	12.5866	12.3891	10.7041	3.54771	18.6891	0	0
ENSG00000178028.14	ENST00000372289.7	0	0	0	0	0	0	0	0	0	0	8.35019
ENSG00000178028.14	ENST00000315913.9	0	3.75737	0	0	0	0	0	0	0	14.911	0
ENSG00000117419.16	ENST00000456170.6	0	12.4402	6.78743	0	7.17024	29.1424	0	0	0	0	0
ENSG00000117419.16	ENST00000372257.7	5.69308	2.17555	1.01086	15.2065	16.3165	3.49069	20.9392	14.7475	28.1535	19.0988	9.16455
ENSG00000187147.18	ENST00000355387.6	0	0	0	0	0	0	0	0	0	2.88963	0
ENSG00000187147.18	ENST00000361799.7	0	0	0	0	1.63111	5.03363	0	0	3.34186	0	0
ENSG00000187147.18	ENST00000372247.6	0	0	0	7.08291	0	0	5.23979	4.39521	0	0	4.17289
ENSG00000126106.14	ENST00000372244.3	0	0	3.29602	4.85608	2.37181	4.07371	0	0	4.1883	0.965611	0.926696
ENSG00000126106.14	ENST00000372237.8	0	2.85816	5.27462	0	0	0	2.75121	2.50485	5.95776	0.810021	1.14076
ENSG00000126106.14	ENST00000372235.7	7.97705	7.85788	0	6.92267	1.81772	2.73193	4.06636	13.754	7.50294	6.73721	0
ENSG00000198520.12	ENST00000535358.6	0	0.530078	0	0	0	0	0	0	0	0	0
ENSG00000142945.13	ENST00000372224.9	0	0	0.308537	7.96293	15.1666	8.58005	10.3565	9.24043	10.3132	1.35585	1.3012
ENSG00000142937.12	ENST00000396651.8	146.384	236.143	91.0216	1212.55	1233.41	579.02	1894.67	1719.12	2622.17	2003.5	2353.67
ENSG00000142937.12	ENST00000372209.3	355.907	271.813	471.237	1283.11	1328.54	1649.92	2029.55	2311.81	2439.93	3872.88	3546.68
ENSG00000142959.5	ENST00000372207.4	0	0	0	0	0	0	2.06167	2.53967	1.13181	1.56554	1.50245
ENSG00000173846.13	ENST00000372201.5	1.46903	0	0	0.53054	0	1.787	4.42171	2.74877	3.67453	2.82387	0
ENSG00000188396.4	ENST00000339355.3	1.2386	0	1.30033	0	0	0	0	0	0	0	0
ENSG00000188396.4	ENST00000675259.1	0	0	0	0	0	1.12617	0	0	0	0	0
ENSG00000222009.9	ENST00000409335.6	0	0	0	0	0	0	0	0	1.32702	0	0
ENSG00000117425.14	ENST00000438067.5	0.891911	0	0	0	0	0	0	0	0	0	0
ENSG00000117425.14	ENST00000447098.6	0	0	0	0	0	0	0	0.283887	0	0	0
ENSG00000117425.14	ENST00000372192.4	0	0	0	0	0	0	0.277172	0.276245	0.615572	0	0
ENSG00000070785.17	ENST00000360403.7	0.465133	2.31818	1.95325	5.41953	4.73336	8.93232	9.2404	7.65978	12.4102	5.72232	6.86476
ENSG00000070785.17	ENST00000372183.7	0	0	0	0	3.17616	1.19598	0	1.90118	0	0	0
ENSG00000126107.15	ENST00000372172.5	0	0.685872	0	0.751028	0	0	2.07902	3.08994	1.14747	4.23277	2.70812
ENSG00000126088.14	ENST00000651476.1	0	0	0	0	0	0	3.66287	0	0	0	0
ENSG00000126088.14	ENST00000652287.1	0	0	16.8697	0	38.3598	22.1012	85.5086	0	0	0	0
ENSG00000126088.14	ENST00000246337.9	11.1847	13.065	0	47.5413	0	43.0659	0	43.7884	80.0608	56.2949	38.0192
ENSG00000162415.7	ENST00000359600.6	0.136668	0	0	0.78972	0.20736	0.221665	1.65816	2.04748	1.3674	1.47119	1.61359
ENSG00000132781.20	ENST00000372104.5	0	0	0	0	0	2.0982	0	0	0	0	0
ENSG00000132781.20	ENST00000448481.5	0	0	0	0	0	2.86251	0	0	0	0	0
ENSG00000132781.20	ENST00000456914.7	0	0	0	1.39581	0	0	0	0	2.63312	0	3.1365
ENSG00000132781.20	ENST00000354383.10	0	0	0	3.12313	0	0	0	0	0	1.28167	0
ENSG00000132781.20	ENST00000372110.7	0	1.47199	0	0	0	0	3.69652	5.15782	0	0	0
ENSG00000132781.20	ENST00000372115.7	0	0	0	0	0	0	0	0	0	3.87462	0
ENSG00000132773.12	ENST00000372090.6	0.93765	0.467298	1.28728	7.34077	7.82462	6.08321	3.52049	9.12354	6.25432	6.4887	2.67818
ENSG00000070759.17	ENST00000372084.5	0	0.325578	0.817725	1.04351	0.495601	0.529791	0.490563	0	1.63408	1.50694	0.554708
ENSG00000132763.15	ENST00000401061.9	0.998562	1.22438	0.998134	0.321535	0.800913	1.12434	1.47955	0.342666	1.10961	0.757423	0.492371
ENSG00000132763.15	ENST00000616135.1	0	1.6394	2.11955	1.44705	0	0	0	1.48555	0	0	0
ENSG00000117450.15	ENST00000447184.6	0	0	0	0	0	0	0	0	24.1376	0	0
ENSG00000117450.15	ENST00000424390.2	0	0	0	0	0	0	0	0	4.7713	0	0
ENSG00000117450.15	ENST00000676549.1	0	0	0	63.1021	47.7739	5.44173	0	0	0	0	0
ENSG00000117450.15	ENST00000262746.5	0	0	0	31.3841	12.4497	0	41.0762	37.5342	16.1821	19.0608	9.74546
ENSG00000117450.15	ENST00000372079.1	96.4933	40.341	30.4964	0	80.4524	260.969	0	0	0	0	0
ENSG00000117450.15	ENST00000319248.13	102.007	202.987	183.189	1098.15	1171.71	1239.22	1287.3	1323.55	1316.95	659.75	647.027
ENSG00000117448.14	ENST00000372070.7	0	0	0	6.606	1.73354	0	4.88312	0	2.33415	4.85867	0
ENSG00000117448.14	ENST00000621846.4	32.1122	57.3839	53.3936	46.1945	0	0	39.0493	56.56	17.6292	0	0
ENSG00000117448.14	ENST00000351829.9	0	0	0	0	51.0286	53.7797	23.0482	8.98353	72.5877	51.2033	52.7923
ENSG00000132780.17	ENST00000537798.5	0.808921	0	0	0	4.6014	6.4	0	0	0	0	0
ENSG00000132780.17	ENST00000350030.8	0	0	0.398678	1.7943	0	0	11.6	11.919	7.76182	3.56973	1.9546
ENSG00000132780.17	ENST00000372052.8	0	1.89934	3.01966	16.6028	23.0728	8.29752	6.16199	11.5431	39.4073	17.3153	18.2421
ENSG00000132780.17	ENST00000351223.7	0	0	0	0	0	0	0	0	0	12.7039	8.20982
ENSG00000159592.11	ENST00000290795.7	2.92429	2.28497	4.3319	3.64267	4.19372	2.72029	4.81982	5.14682	6.12334	9.89724	8.31678
ENSG00000159596.7	ENST00000372025.5	2.4294	3.77681	2.65199	13.5958	7.66551	11.0183	18.9717	8.50848	18.9558	26.6264	22.0463
ENSG00000197429.11	ENST00000359942.8	0	0	0.474797	0.653333	0.686194	0	0.718988	0	0.754165	0	0
ENSG00000086015.23	ENST00000361297.7	0	0	0	0	0	2.95044	0	0	0	0	0
ENSG00000086015.23	ENST00000674079.1	0	0.308767	0	2.46126	2.11505	0	3.48925	2.31842	2.32456	3.09646	1.86921
ENSG00000117461.15	ENST00000372006.5	0.160993	0	0.169016	1.39542	0.977071	1.3056	0.241785	0.722929	0.536928	0	0
ENSG00000117472.10	ENST00000372003.6	1.13202	0	0.600819	0	0.85048	0	2.5255	4.1951	7.4778	0.862002	1.65452
ENSG00000085998.15	ENST00000371984.8	0	0.742274	0	0	1.98581	0	5.42122	5.34806	6.2496	4.38891	0
ENSG00000085998.15	ENST00000396420.8	0	0	0	1.74794	0	0	0	0	0	0	0
ENSG00000085998.15	ENST00000686737.1	0	0.807628	0	0	0	1.84041	1.10824	0	0	0	4.81716
ENSG00000085998.15	ENST00000685444.1	0	0	0.633557	0	0.799681	0	0	0	0	0	0
ENSG00000085998.15	ENST00000688608.1	0	0	0	0	0	3.09126	0	0	0	0	0
ENSG00000085998.15	ENST00000687683.1	0	0	0	1.21827	0	2.3788	0	1.36551	0	0	0
ENSG00000085999.13	ENST00000442598.5	0	0	0	0	0	0.985638	1.50432	4.99764	6.68125	0	0.985521
ENSG00000085999.13	ENST00000488942.5	0	0	0	1.2722	0	0	0	0	0	0	0
ENSG00000132128.18	ENST00000617190.5	0	0	0	0	0.838951	0	0	0	0	0	0
ENSG00000132128.18	ENST00000343304.10	0	0	0	0	4.29581	0	0	0	0	0	0
ENSG00000132128.18	ENST00000615587.4	3.85004	2.36154	2.48733	4.27828	0	5.76416	8.51746	7.995	15.8034	17.762	13.2363
ENSG00000173660.12	ENST00000311672.10	80.9896	178.873	46.3669	860.875	930.073	1091.27	972.513	948.499	1245.95	720.457	700.963
ENSG00000117481.11	ENST00000474844.6	0	0	0	2.05051	1.04631	0	0.426793	1.49684	0	0.443872	0
ENSG00000117481.11	ENST00000537428.2	0.41781	0	0	2.67101	2.16905	5.42127	7.20885	4.79265	3.0847	4.15046	2.17718
ENSG00000117480.16	ENST00000243167.9	3.03845	3.19807	3.59721	1.85615	0	0	2.57292	0	3.34442	1.31728	0.632096
ENSG00000079277.22	ENST00000371945.10	0	0	0	0	0	0	0	2.15798	3.18551	0	3.75903
ENSG00000079277.22	ENST00000649800.1	0	0	0	0	2.15071	0	0	0	0	0	0
ENSG00000079277.22	ENST00000650026.1	0	0.976745	0	0	0	0	0	0	0	0	0
ENSG00000079277.22	ENST00000650508.1	0	0	0	3.39618	0	4.19772	0.981107	0	0	2.42294	0
ENSG00000079277.22	ENST00000465783.6	0	0	0	13.1028	0	12.2847	15.7982	9.53922	0	0	0
ENSG00000142961.16	ENST00000319928.9	0.308532	0.922579	0	0	0	0.500417	0	0	2.05797	0.94893	0
ENSG00000123472.13	ENST00000574428.6	1.34394	3.269	2.82793	7.26262	7.26264	3.06568	10.9459	10.0494	14.0833	6.18457	10.0947
ENSG00000123472.13	ENST00000526821.5	6.66747	6.0495	13.7578	0	6.56576	12.2892	0	0	0	0	0
ENSG00000159658.15	ENST00000371933.8	0	0	0.85281	0	0	0	0	0	0.689964	0	0
ENSG00000159658.15	ENST00000672422.2	0	1.08	0	0	0	0	0	0	0.689964	2.33304	0
ENSG00000159658.15	ENST00000674435.1	0.700441	0	0	2.05742	0	2.09689	0.64168	0.865328	0	0	2.10191
ENSG00000187048.14	ENST00000310638.9	19.1808	79.9044	69.0036	0	0	0	0	0	0	0	0
ENSG00000187048.14	ENST00000371905.1	0	1.67588	1.59387	0	0	0	0	0	0	0	0
ENSG00000186377.8	ENST00000371901.4	0.382628	0	0.803434	0	0	0	0	0	0	0	0
ENSG00000162365.13	ENST00000371891.8	6.36118	19.2724	19.0137	0	0	0	0	0	0	0	0
ENSG00000162365.13	ENST00000619754.4	2.92333	0.806199	1.36078	0	0	0	0	0	0	0	0
ENSG00000162366.8	ENST00000294338.7	0	0	1.36877	0	0	0	0	0	2.17415	0	0
ENSG00000162367.12	ENST00000691006.1	0	0	0	0	0.530582	0.283592	0	0	0	0	0
ENSG00000123473.17	ENST00000683977.1	0	0	0	0	0	0	0	0.323244	0	0	0
ENSG00000123473.17	ENST00000682977.1	0	0	0	0	0	0	0	0	0.606619	0.279712	0
ENSG00000162368.14	ENST00000371873.10	28.6582	21.6286	24.0225	37.0908	51.7856	54.2143	27.1475	26.5888	40.9789	21.4576	18.7333
ENSG00000186790.6	ENST00000335071.4	0	0	0	1.46064	1.53411	3.27989	0	0	0	0	0
ENSG00000186564.6	ENST00000334793.6	0	0	0	1.38728	1.45705	0	0	0	0	0	0.472426
ENSG00000269113.4	ENST00000606738.3	0.105558	0	0.221637	0.610017	0.160159	0.684832	0	0	0	0	0
ENSG00000117834.13	ENST00000438567.7	0	0	0.695445	0	0	0	3.95919	1.57838	4.39606	2.43243	2.3344
ENSG00000132122.12	ENST00000396199.7	0	0	0	0	0.494234	0.264165	0	0	0	0	0
ENSG00000132122.12	ENST00000371843.7	0	0	0.393655	0	0	0	0	0	0	0	0
ENSG00000186094.18	ENST00000371839.6	0	0	0.588472	0	0	0	0	0	0	0	0
ENSG00000185104.21	ENST00000396153.7	0	0.312351	0.3342	1.67979	0.726596	0	1.98755	2.98422	3.50791	1.43755	2.41432
ENSG00000123080.12	ENST00000262662.5	0	0	0	0	0	0	3.90953	0	1.11435	0	0
ENSG00000123080.12	ENST00000396148.2	0	0.837913	0.441273	3.64321	3.18872	0	0	4.61695	11.0699	0	0.620391
ENSG00000123080.12	ENST00000371761.4	3.08821	0	0	0	0	5.00887	0	0	0	1.58303	0
ENSG00000123091.5	ENST00000242719.4	7.8685	7.31592	4.31452	8.74027	11.8449	20.7248	7.94408	7.37277	13.1548	11.7057	11.1694
ENSG00000085831.16	ENST00000680483.1	0	0	0	1.34794	0	0	0	0	0	0	0
ENSG00000085831.16	ENST00000422925.6	0	0	0	0	3.31145	0	0	0	0	0	0
ENSG00000085831.16	ENST00000439482.6	0	0	0	0	0	0	0	1.39441	0	0	0
ENSG00000085831.16	ENST00000262675.11	0	0	0	0	0	1.29474	0	0	0	0	0.589059
ENSG00000085831.16	ENST00000371747.7	0	0	0	0	0	0	0.708859	0	0	0	0
ENSG00000085831.16	ENST00000262676.9	0	0	0	0	0	0.206283	0	0	0	0	0
ENSG00000085832.17	ENST00000371730.6	3.08079	0.852946	1.61721	1.97838	0	3.33106	0.514084	2.30557	0.285396	1.84234	0
ENSG00000085832.17	ENST00000371733.8	0	0	0	0	2.60821	0	0	0	0	0	2.30637
ENSG00000117859.19	ENST00000371714.5	0	0	1.48576	1.41525	0	0	0	0	0	0	0
ENSG00000117859.19	ENST00000447887.5	0	0	0	0	0	3.74053	0	0	0	0	0
ENSG00000117859.19	ENST00000428468.6	0	0	0	0	2.33309	1.08946	0	2.07283	0	4.81142	0
ENSG00000117859.19	ENST00000453295.5	2.21559	0	0	0	0	4.77223	0	9.81367	0	11.4427	2.31483
ENSG00000117859.19	ENST00000361556.9	0	0	0	4.99977	0	0	9.10702	3.79418	10.9578	0	7.49107
ENSG00000117859.19	ENST00000462759.5	0	4.33138	3.30766	5.63194	2.91425	0	6.90158	5.30717	0	0	0
ENSG00000078618.23	ENST00000440943.5	7.31137	8.11249	7.08428	0	13.5528	20.6943	0	0	0	0	0
ENSG00000078618.23	ENST00000539524.5	0	0	0	0	0	0	0	0	0	3.11542	0
ENSG00000078618.23	ENST00000352171.12	0	2.43725	0	1.68491	0	0	1.92691	8.27641	5.78452	0	0
ENSG00000169213.7	ENST00000371655.4	0	0	0	0.502256	0.371928	1.87556	0.184074	0.183595	0	0.282725	0.343834
ENSG00000117862.13	ENST00000371626.9	12.7807	10.6176	17.9617	38.4581	37.4783	29.8844	60.5189	61.7161	100.27	103.664	72.9251
ENSG00000198841.4	ENST00000371614.2	0.526344	0.524629	0	8.36391	3.993	6.82954	5.53337	6.78125	6.14394	4.0471	3.88399
ENSG00000134717.18	ENST00000489308.6	10.4547	4.74615	0	9.41802	4.49803	0	0	4.76631	2.28736	0	0
ENSG00000134717.18	ENST00000313334.13	0.3362	0	1.3684	1.98944	2.28883	0.430468	0	1.07787	0.582049	3.4627	3.28141
ENSG00000134717.18	ENST00000472944.6	0.685436	2.96361	2.84013	9.68965	10.7051	18.6911	19.9263	23.9057	30.9804	21.9292	20.5104
ENSG00000157077.16	ENST00000287727.8	0	0	0.329131	0.452892	0.951343	0.508487	0	0	0	0.482116	0
ENSG00000157077.16	ENST00000371591.2	0	0	0	0	0	0	0	0	0.91548	0	0
ENSG00000157077.16	ENST00000357206.6	0.177845	0.531797	0	0	0	0	0.801283	0.532402	0	0	0.524942
ENSG00000154222.15	ENST00000371586.6	0	0	0	0	0	0	0	0	0	1.09489	0
ENSG00000154222.15	ENST00000284376.8	0	0	0	1.56471	0.372187	0	0.6087	0	0	0	0
ENSG00000154222.15	ENST00000438021.5	0	0.336898	0.709688	0	1.73051	2.74106	0	1.4661	1.6909	0	0
ENSG00000085840.13	ENST00000371566.1	0	0	0	2.37743	3.29257	3.07975	1.62955	1.28202	3.61871	0	0
ENSG00000134748.13	ENST00000257181.10	0	0.366877	0.323518	3.13329	4.44181	3.24879	3.77486	4.61797	5.90955	5.21283	3.41112
ENSG00000134744.14	ENST00000257177.9	0.137553	0.273174	0.287725	0	1.4601	0	1.85222	1.84602	1.14255	2.95025	2.42688
ENSG00000134744.14	ENST00000355809.4	0	0	0	0	0	0	0	0.604023	0	0	0
ENSG00000116157.6	ENST00000361314.5	0	0	0	16.98	10.5498	7.93816	3.53055	3.51875	12.6624	2.41027	5.78239
ENSG00000182183.15	ENST00000517870.2	0	0	0	1.64349	0	0	0	0	0	0	0
ENSG00000162377.6	ENST00000371538.5	0.41077	1.02358	1.0781	3.93639	1.56318	2.33184	4.6255	3.99651	2.39744	3.79997	3.63739
ENSG00000162378.13	ENST00000294353.7	1.16737	0.969639	0.612774	0.562128	0.743546	1.26226	0	0.145611	0.162221	0.1496	0.717855
ENSG00000203995.10	ENST00000612017.4	0	0	0	0	0.678798	0	0	0	0	0	0
ENSG00000121310.17	ENST00000371522.9	16.6421	10.8978	15.2091	4.8368	4.45737	0	0	0	2.26793	0	0
ENSG00000121310.17	ENST00000536120.5	0	5.66481	0	0	0	0	0	0	0	0	0
ENSG00000121310.17	ENST00000358358.9	26.9845	33.6711	36.9297	0	0	0	10.0039	6.0425	12.682	0	4.66711
ENSG00000116171.19	ENST00000371514.8	13.837	39.2375	40.1293	14.9762	13.3728	2.38505	7.0361	7.63569	13.1767	4.80483	7.69139
ENSG00000116171.19	ENST00000408941.7	310.299	141.955	237.831	96.3212	86.6434	121.258	30.6444	34.4333	34.2957	29.0437	33.0034
ENSG00000116171.19	ENST00000488965.1	0	0	0	0	0	0	0	0	0	0	0.373649
ENSG00000174348.14	ENST00000312553.10	1.67367	0.278036	0.292846	0.805927	2.53939	1.35729	0	0	0	0	0.411678
ENSG00000157184.7	ENST00000637252.1	0	0	6.00221	0	8.43907	0	0	0	0	0	0
ENSG00000157184.7	ENST00000371486.4	4.70165	0	2.66058	9.05733	0	6.71264	0	0	0	0	5.5511
ENSG00000162384.14	ENST00000294360.5	12.6039	12.5628	7.56114	24.8396	20.4893	25.9856	31.0083	26.9509	28.5342	23.5358	18.6013
ENSG00000162385.11	ENST00000371470.8	16.9814	34.2112	23.7939	156.467	156.852	170.382	135.575	149.861	160.56	110.259	107.103
ENSG00000157193.18	ENST00000306052.12	0	0.102674	0	0.148807	0.625168	0.835371	0	0	0.858863	0	0.211646
ENSG00000157193.18	ENST00000668448.1	0	0	0	0	0	0	0	0.949495	0	0	0
ENSG00000157193.18	ENST00000657895.1	0	0	0	0	0	0	0.732555	1.12466	0	0	0
ENSG00000157193.18	ENST00000662198.1	0	0	0	0	0	0	0	0	0	0.673696	0
ENSG00000157193.18	ENST00000668071.1	0	0	0	0	0.330917	0	0.865053	0	0	0	1.16129
ENSG00000157193.18	ENST00000653217.1	0	0	0	0	0	0	0	0	0	0.837143	0
ENSG00000058804.12	ENST00000371429.4	1.24926	0.177884	0.749436	6.70388	8.39567	9.55212	4.28867	3.74103	5.42138	4.94003	2.90133
ENSG00000058799.15	ENST00000371399.5	2.44955	5.56565	3.21454	8.84656	10.2207	6.95276	0	3.68792	12.2543	11.3009	4.53225
ENSG00000211452.12	ENST00000361921.8	5.626	14.275	0	0	0	0	4.29273	0	0	0	0
ENSG00000211452.12	ENST00000322679.10	24.4547	33.0983	24.6048	0	0	0	0	3.26318	14.5416	2.51443	1.60873
ENSG00000081870.12	ENST00000371378.6	0	1.29422	0	0	0	3.98643	5.57664	0	0	1.90684	0
ENSG00000081870.12	ENST00000194214.10	14.1425	8.61887	14.7928	75.7742	79.3135	94.0885	76.0906	111.752	109.432	26.9735	28.5937
ENSG00000116212.15	ENST00000371368.5	0	0	0	0	0	0	0	1.95154	0	0	0
ENSG00000116212.15	ENST00000319223.8	2.59789	1.03577	4.36377	12.3137	15.0326	18.5398	15.5477	17.3355	19.0613	16.7793	11.5022
ENSG00000203985.11	ENST00000545928.5	0	0	0	0	0	0	1.73257	0	3.20624	0	0
ENSG00000203985.11	ENST00000420619.5	0	0	0	0	0	0	0	3.54588	0	0.607169	1.1654
ENSG00000116209.12	ENST00000234831.10	1.33764	2.85034	1.40132	2.42042	1.88551	1.0035	0.889464	2.13608	1.64605	4.03747	4.4204
ENSG00000116209.12	ENST00000371348.5	42.5903	46.0275	37.3566	43.2868	54.1476	55.6437	39.2233	39.9838	45.7567	70.8988	89.7853
ENSG00000116209.12	ENST00000371341.5	0	0	0	0	0	20.8579	0	0	0	0	0
ENSG00000116209.12	ENST00000452421.5	0	0	0	0	3.81951	3.36761	5.16477	3.9475	7.19398	14.775	11.4702
ENSG00000116205.14	ENST00000234827.6	1e-06	0.15038	0.103348	0	0.143861	0.244703	1.01963	0.338752	0.503172	0.232012	0.222662
ENSG00000215883.11	ENST00000287899.13	0	0	0	0.697956	0	0	0	0	0	0	0
ENSG00000215883.11	ENST00000497820.1	0	0	0	4.75099	4.92476	0	0	0	0	0	0
ENSG00000116221.15	ENST00000360840.9	14.8555	25.3362	17.7566	51.1207	72.4252	65.3463	66.0526	68.6648	92.1256	50.116	41.4462
ENSG00000116221.15	ENST00000605337.5	0	0	0	0	2.68341	1.14256	8.18497	5.05807	2.10809	0	5.55807
ENSG00000116221.15	ENST00000398219.2	0	0	0	0	0	2.08501	0	0	0	5.72347	0
ENSG00000157216.16	ENST00000417664.7	0	0	0	0	0	4.28511	0	0	0	0	0
ENSG00000157216.16	ENST00000371319.8	0	0	2.86227	3.47785	0	0	0	0	0	5.76002	5.81205
ENSG00000157216.16	ENST00000357475.9	0	0	0	1.62251	5.91215	0	5.98116	4.9778	0	0	0
ENSG00000157216.16	ENST00000610401.5	0	0	0	0	0	0	0	0	8.03795	1.80852	0
ENSG00000162390.18	ENST00000343744.7	0.938037	0	0	0	0	1.97641	0	0	0	0	0
ENSG00000162391.12	ENST00000302250.7	0	3.10431	2.80257	5.67844	8.19416	6.85655	0.6682	0	0	0	0
ENSG00000162391.12	ENST00000371304.2	2.27298	0	0	0	0	0	0	0	0	0	0
ENSG00000243725.7	ENST00000371281.4	0	0	0	0	5.53212	5.91143	0	7.63758	0	0	0
ENSG00000162396.6	ENST00000371279.4	0.728937	0	0.382632	2.63298	1.10599	2.36457	1.09474	0	1.21554	1.68146	2.15159
ENSG00000006555.11	ENST00000371276.9	0	0	0.255776	0.703908	0.739313	0	0	0	0	0	0
ENSG00000116133.13	ENST00000371269.9	27.7767	0	0	56.0934	56.2507	74.9093	0	43.3445	0	66.135	50.8395
ENSG00000116133.13	ENST00000535035.6	0	26.7456	25.31	0	0	0	47.0584	0	96.5799	0	0
ENSG00000169174.11	ENST00000302118.5	0	0	0	0	0	0	1.74291	0	7.95736	1.82922	0
ENSG00000169174.11	ENST00000673903.1	0.260759	2.34512	3.5588	8.78881	13.4804	2.5376	11.3108	11.1585	24.2364	9.52459	6.63896
ENSG00000162402.14	ENST00000294383.7	0.800615	0.435276	0.244849	0.961653	1.32517	1.5096	1.74893	1.74309	1.57781	0.672167	0.859355
ENSG00000162402.14	ENST00000484447.5	0	0	1.75731	0	0	0	0	0	0	0	0
ENSG00000162407.9	ENST00000371250.4	9.67084	11.4441	8.53652	1.10063	4.62364	6.17826	10.2974	7.84511	12.9744	20.3072	13.4778
ENSG00000162409.12	ENST00000371244.9	0.084333	0	0	0.492904	0.513122	1.23104	0.253343	0.883644	0.290057	0.389065	0.373385
ENSG00000187889.13	ENST00000343433.7	0	0	0	0	0.397122	0	0	0	0	0	0
ENSG00000157131.12	ENST00000695677.1	0	0	0	0	0	0	0	0	4.78591	0	0
ENSG00000157131.12	ENST00000695681.1	0	0	0	0.607535	0	0	0	0	0	0	0
ENSG00000157131.12	ENST00000361249.4	10.8571	15.7182	22.763	0	0	0	2.17812	0	0	5.84328	5.88614
ENSG00000021852.14	ENST00000371237.9	49.1397	71.83	64.2806	0	0	0	1.93185	0	0	4.57352	1.26561
ENSG00000021852.14	ENST00000695842.1	34.4097	0	0	0	0	0	0	0	0.770501	0	0
ENSG00000021852.14	ENST00000696164.1	0	0	2.50286	0	0	0	0	0	0	0	0
ENSG00000173406.16	ENST00000371236.7	0	0	0.478745	0.243022	0	0	0	0	0	0	0
ENSG00000173406.16	ENST00000414851.6	0	0.155608	0	0	0.710704	0.506419	0	0	0	0	0
ENSG00000173406.16	ENST00000332102.10	3.85897	0	0	2.49014	0	0	0	0	0	0	0
ENSG00000162600.12	ENST00000371226.8	2.88213	4.74835	5.00128	0.68823	2.16841	1.54533	3.57727	2.13919	7.944	1.46519	2.8365
ENSG00000162601.11	ENST00000655340.1	0	0	0	0.274363	0	0	0	0	0	0	0
ENSG00000162601.11	ENST00000472487.6	0	0	0	0	0	0	0	0.619993	0	0.787085	0
ENSG00000162601.11	ENST00000622766.1	0.266136	0.265269	0	0	0.605696	1.07913	0.399692	0	0.353338	0	0.785547
ENSG00000177606.8	ENST00000371222.4	5.11841	2.29019	6.71475	6.63858	6.585	12.4223	11.6635	7.69717	8.51445	3.53341	7.16031
ENSG00000172456.18	ENST00000303721.12	0	1.79397	3.50839	0.683103	0	0	0	2.14478	0	1.39748	1.34116
ENSG00000172456.18	ENST00000371212.5	0.923723	0	0	0	1.67528	0	4.14562	0	3.68245	0	0
ENSG00000172456.18	ENST00000371210.1	16.8029	21.9821	0	0	0	0	0	0	0	3.09882	2.97393
ENSG00000134709.13	ENST00000371208.5	1.12436	2.52156	3.83584	2.6444	2.73253	1.82363	1.68877	1.68301	2.81239	3.02584	1.45195
ENSG00000134716.11	ENST00000371204.4	11.8711	30.4343	21.9475	2.72235	2.87039	0	3.53777	2.82075	0	0	2.08592
ENSG00000162599.17	ENST00000403491.8	2.17481	1.47447	2.4241	0.37061	0	0.554809	0	1e-06	1e-06	1e-06	1e-06
ENSG00000162599.17	ENST00000663597.1	0	0	0	0	0	0	0.554211	0	0	0	0
ENSG00000162599.17	ENST00000357977.5	0.928604	0	0	0	0	0	0	0.389512	0	0	0
ENSG00000162599.17	ENST00000493627.1	0	1.71238	0	0	0	0	0	0	0	0	0
ENSG00000162604.12	ENST00000606498.5	6.39946	9.56792	3.35919	20.0124	35.4986	36.3282	30.4346	12.7717	17.7857	30.3189	40.7553
ENSG00000162604.12	ENST00000371177.2	0	0	0	0.377944	0	0	0	0	0	0	0
ENSG00000132849.22	ENST00000371158.6	0	0	0	0	0	0	0	0	0	0.715202	0.411827
ENSG00000132849.22	ENST00000642238.2	0	0	0	0	1e-06	0	0	0	0	1e-06	1e-06
ENSG00000132849.22	ENST00000494842.2	0	1.69344	0	0	0	0	0	0	0	0	0
ENSG00000132849.22	ENST00000646453.1	1.07834	0	0	0	0	0	0.462712	0	0	0	0
ENSG00000132849.22	ENST00000307297.8	0	0	0	0	0	0.932289	0	0	0	0	0
ENSG00000132854.19	ENST00000371153.9	0	0	0.307126	0	0.443869	0.237245	1.97711	1.0948	2.19575	0.224941	0
ENSG00000162607.13	ENST00000371146.5	1.88566	0.23494	0.494953	14.6416	7.86785	8.79293	5.61417	6.37115	7.07499	4.3497	5.56838
ENSG00000116641.18	ENST00000251157.10	0	0	0	1.8222	2.66289	0	0	0	0	0	0
ENSG00000116641.18	ENST00000635253.2	0	0	0	0	0	0.599798	0.991701	2.18394	0	0	0
ENSG00000116641.18	ENST00000454575.6	0	0	0	0	0	0	0	1.15006	2.47141	0	0
ENSG00000116641.18	ENST00000340370.10	0	0	0	0	0	0.891791	0	0	0	3.12625	1.5737
ENSG00000116641.18	ENST00000404627.3	0	0.315123	0	0	0	0	0	0	0.66286	0	0.466591
ENSG00000132855.5	ENST00000371129.4	71.2057	81.1142	64.9993	41.5981	52.3437	51.2738	0	0	0	0	0
ENSG00000125703.15	ENST00000371120.7	1.45387	1.44914	1.22106	2.52032	3.08826	4.71616	2.18348	0.874065	1.45465	1.34147	0.477137
ENSG00000088035.18	ENST00000263440.6	1.00151	0.662624	1.10385	0	0	0	0	0	2.49787	0	0
ENSG00000142856.17	ENST00000271002.15	2.15712	2.15009	2.26462	23.3713	24.4796	12.2455	12.8267	13.0479	27.453	8.29314	4.77535
ENSG00000203965.13	ENST00000371088.5	0	0	0	0.575095	0.604021	0	1.79364	1.19176	2.65541	1.22441	0.798471
ENSG00000079739.17	ENST00000371084.8	21.4517	40.4453	30.3467	15.4571	19.6	13.1235	30.4542	23.1503	44.7449	15.589	15.2021
ENSG00000079739.17	ENST00000540265.5	7.55773	0	0	0	0	0	0	0	0	0	0
ENSG00000185483.13	ENST00000371079.6	0	0	0	0.593346	0.20773	0	0	0	0	0.421089	0
ENSG00000162437.15	ENST00000371072.8	0	0	0	0.53944	0.283287	0	1.40203	1.67681	1.24539	0.287124	0.275568
ENSG00000162434.13	ENST00000342505.5	0.834897	0	0	1.88168	0	4.48889	1.24367	0	1.8778	0	3.66529
ENSG00000162434.13	ENST00000673046.1	0.948318	0	0	0	0	0	2.40649	0	0	0	0
ENSG00000162434.13	ENST00000672247.1	0	2.11134	0	1.94075	2.67436	3.11269	0	0	0	1.00813	0
ENSG00000162434.13	ENST00000672434.1	0	0	0	0	0	0	0	1.39787	0	2.10107	0
ENSG00000162434.13	ENST00000672574.1	0	2.40224	1.37121	0	0	6.32984	0	0	0.98459	0	0
ENSG00000162434.13	ENST00000673246.1	0	0	1.15785	0	3.1603	0	0	0	0	0	0
ENSG00000162433.15	ENST00000545314.5	0	0	0	0	0	0	10.2366	0	0	0	0
ENSG00000162433.15	ENST00000395334.6	0	0	0	0	0	0	0	0	11.195	0	0
ENSG00000162433.15	ENST00000327299.8	7.02032	8.23959	9.29026	4.55563	9.18559	7.74212	0	11.1756	0	8.78084	7.09173
ENSG00000116675.16	ENST00000494710.6	0	0	0	0.80857	0	0	0	0	0	0	0
ENSG00000116675.16	ENST00000395325.7	0	0	0	0.605766	0.212078	0	0.629767	0	0.466171	0	0
ENSG00000213625.9	ENST00000371065.9	6.62804	3.92354	2.81759	4.43965	6.51653	9.5766	7.28612	7.37537	9.54761	5.52979	5.28122
ENSG00000116678.20	ENST00000371059.7	0.359238	1.33848	0.608521	0	0	0.60923	0	0	0	0	0
ENSG00000116678.20	ENST00000349533.11	0.3858	0.101656	0.516939	0.156177	0.14634	0	0	0	0	0	0
ENSG00000116678.20	ENST00000616738.4	6.51417	6.29195	3.63532	0.891557	0	0.773306	0	0	0	0	0.234551
ENSG00000116678.20	ENST00000371058.1	0	0.359608	0	0	0	0	0	0	0	0	0
ENSG00000184588.18	ENST00000371045.9	0.411431	0.41009	0.215967	0.297176	0.312124	0.333656	0	0	0	0	0
ENSG00000152760.10	ENST00000282670.7	1.52595	1.90122	2.0025	0	0	0	0	0	0	0	0
ENSG00000152763.17	ENST00000371026.8	0	0	0	0.310919	0.653999	0	0	0	0	0	0
ENSG00000198160.15	ENST00000355977.10	1.39832	0	1.40389	0	0	1.40458	0	0	0	0	0
ENSG00000198160.15	ENST00000371012.6	0	0	0.371352	0	0.536692	0	0	0	0	0	0.52204
ENSG00000198160.15	ENST00000401041.6	0	0	0	0	1.56642	1.48947	0	0	0	0	0
ENSG00000198160.15	ENST00000355356.3	1.32902	1.50775	0.559958	0.971205	0	0	0.794652	1.50946	1.40137	1.55081	1.98442
ENSG00000116704.8	ENST00000235345.6	3.10121	3.2217	4.51794	3.57173	3.92045	7.12455	2.52298	1.35367	1.93896	1.19207	0.953355
ENSG00000081985.14	ENST00000674203.2	0	0.147369	0	0	0	0	0	0	0	0	0
ENSG00000142864.15	ENST00000361219.11	0	0	0	0	3.46738	0	0	0	0	0	0
ENSG00000142864.15	ENST00000370994.8	1.49303	0.913031	2.28734	2.83739	0	4.21594	1.79805	1.73017	3.13007	2.14128	1.01833
ENSG00000142864.15	ENST00000370995.6	11.0232	15.4764	12.8932	64.6138	57.969	65.9737	48.9477	52.8286	57.4866	40.4641	46.416
ENSG00000142864.15	ENST00000370990.5	0	0	0	0	24.586	0	35.3348	33.108	23.9566	24.9322	45.1539
ENSG00000116717.13	ENST00000370986.9	1.97991	14.5733	5.39537	29.3485	23.2398	28.0564	36.5965	28.5598	16.2539	34.2613	22.8697
ENSG00000116717.13	ENST00000617962.2	28.6353	0	24.5604	0	0	38.8966	0	0	0	0	0
ENSG00000172380.6	ENST00000370982.4	3.88979	3.32402	2.91691	4.81726	5.43113	5.40755	0.278175	0.277245	0	0	0
ENSG00000162595.8	ENST00000646789.1	1.24665	2.48517	3.27194	0	0	0	0	0	0	0	0
ENSG00000116729.14	ENST00000354777.6	0	0	0.450898	1.01712	0	0	0	0	0	0	0
ENSG00000116729.14	ENST00000262348.9	0	0	0	0.611863	0	0	0	0	0	0	0
ENSG00000116729.14	ENST00000370976.7	2.21201	0	1.93541	0	1.67809	2.98977	0	0	0	0	0
ENSG00000116729.14	ENST00000370971.1	1.70274	0	0	0	0	0	0	0	0	0	0
ENSG00000024526.17	ENST00000456315.7	0	0	0	4.61318	1.28787	0	0	2.04854	0	0.4677	0
ENSG00000024526.17	ENST00000370966.9	0	0	0	0	3.3362	3.73346	1.07067	0	1.47633	0	0.261321
ENSG00000033122.21	ENST00000651989.2	0	0	0	0	0	0	5e-06	0	0	0	0
ENSG00000066557.6	ENST00000370952.4	3.64335	2.95078	0.621593	6.42048	7.63596	10.5635	3.55736	4.43183	5.43034	2.73156	2.18456
ENSG00000116754.14	ENST00000370950.7	2.96455	0	1.59648	6.16968	13.5421	9.21246	2.05024	8.79609	10.6062	13.2935	0
ENSG00000116754.14	ENST00000370949.2	0	1.65959	0	0	0	0	1.39298	0	0	0	11.3181
ENSG00000118454.13	ENST00000370944.9	0.426063	0.141511	0	1.45267	2.15411	2.53299	0.435955	0.410343	1.42049	1.76601	0
ENSG00000118454.13	ENST00000262346.6	0	0	0.261925	0	0	0	1.48221	2.26644	0	0	1.10463
ENSG00000116761.12	ENST00000411986.6	13.2627	17.6955	0	2.47211	1.94734	1.38779	5.78263	1.9211	5.70729	16.4477	5.75803
ENSG00000116761.12	ENST00000370938.8	0	0	12.6996	0	0	0	0	0	0	0	0
ENSG00000132485.14	ENST00000370920.8	2.09807	4.17455	0	8.26765	0	10.5815	11.9236	0	7.98176	12.0613	9.53959
ENSG00000132485.14	ENST00000254821.10	0	0	0	0	11.5645	3.97611	0	9.89553	0	0	0
ENSG00000172260.15	ENST00000357731.10	0	0.069244	0	0	1.8e-05	0	0	0	0	0	1e-06
ENSG00000172260.15	ENST00000306821.3	0	0	0	0	0.218653	0	0	0	0	0	0
ENSG00000162620.16	ENST00000370911.7	0	0	0	0	0	0	0	0	0.954227	0	0
ENSG00000259030.8	ENST00000534632.5	0	2.85609	0	0	0	0	0	0	0	0	0
ENSG00000254685.8	ENST00000370898.9	0.691366	0.518263	0.362924	0.999863	0.524491	1.12135	0.51916	0	0.576445	0.531597	0.255086
ENSG00000116791.14	ENST00000370872.7	43.3004	0	27.4108	0	6.25952	20.9311	0	0	0	0	0
ENSG00000116791.14	ENST00000340866.10	9.0138	34.8642	12.3134	42.6621	46.2025	24.3485	54.4668	59.1691	62.3917	42.5186	47.3834
ENSG00000162623.16	ENST00000457880.6	1.47449	0	0.599181	5.7517	4.15319	1.41099	2.5138	4.05025	0	0	3.97094
ENSG00000162623.16	ENST00000370867.8	0	0.684671	0	0	0	0	0	0	1.05141	5.67688	0
ENSG00000162623.16	ENST00000479111.5	0	1.83468	0	0	0	4.19422	19.9947	20.5794	23.9362	12.9704	14.3955
ENSG00000137968.17	ENST00000370859.8	0.210566	0	0	0	0.319484	1.70762	0.316236	0	1.05339	0	0.932399
ENSG00000117054.15	ENST00000680805.1	0	0	0	0	0	0	0	0	0	0	1.09714
ENSG00000117054.15	ENST00000681790.1	2.12196	1.74096	0	1.81138	0	0	0.688096	0	0	0	0
ENSG00000117054.15	ENST00000370841.9	2.34399	4.66541	5.42025	3.04801	3.77455	0	8.13772	13.8751	25.8184	13.0613	12.8614
ENSG00000117054.15	ENST00000679687.1	1.28817	3.6554	0	0	0	2.30325	0	0	3.60699	0	0
ENSG00000137955.16	ENST00000319942.8	9.6072	8.29963	4.70679	25.6855	20.9755	30.8356	60.8924	59.9723	42.5969	45.9992	62.5574
ENSG00000184005.11	ENST00000328299.4	0	0.116204	0	0	0	0	0	0	0	0	0
ENSG00000142892.15	ENST00000370812.8	0	1.05545	1.66725	3.05889	3.48048	3.14819	4.24906	2.92978	2.35399	4.88441	1.56252
ENSG00000142892.15	ENST00000445065.5	1.69855	0	0	0	0	0	0	0	0	0	0
ENSG00000154027.19	ENST00000354567.7	0	0	0.265987	0	0	0	0	0	0	0	0
ENSG00000154027.19	ENST00000478255.1	0	0	0	0	7.21345	4.05713	0	0	0	0	0
ENSG00000036549.13	ENST00000370801.8	0	0	0	0	0	0	2.43275	1.86509	0.577808	1.92931	1.10337
ENSG00000077254.14	ENST00000481579.5	0.586882	3.21733	2.77258	5.65472	4.00704	2.89375	0	0	0	0	0
ENSG00000077254.14	ENST00000357428.5	0	0	0	0	0	0	2.40599	2.05996	4.58987	1.5117	2.61302
ENSG00000077254.14	ENST00000370792.7	0.575664	0	0	0	0	0.466843	0	0	0	0	0
ENSG00000180488.16	ENST00000370791.8	0.751282	0.748834	0.788723	1.80883	1.71008	1.82779	0.18805	0.937254	1.4616	0.770222	0.739194
ENSG00000162614.19	ENST00000342754.5	0.623577	0	0	0.914504	0.946348	2.0228	0	0	0	0	0
ENSG00000162613.17	ENST00000370768.7	0.163914	0	0.872922	0.500983	0.241105	0.854438	0.238195	1.33829	0.57033	0.807578	0.233863
ENSG00000162613.17	ENST00000370767.5	2.23712	0.672908	0	9.80075	13.6652	15.639	18.7108	20.6265	17.5175	23.6622	22.7584
ENSG00000162616.9	ENST00000370763.6	2.3148	1.15363	1.82262	1.25398	2.63412	3.28514	2.60734	3.46483	4.82507	4.45905	3.64396
ENSG00000137960.6	ENST00000370759.4	1.74086	1.95208	2.51297	1.57373	0.990585	2.4706	3.59535	3.61666	5.44307	6.35815	1.92714
ENSG00000122420.10	ENST00000370758.5	0	0.187239	0	0	0	0	0	0	0	0	0
ENSG00000137959.17	ENST00000679848.1	0.436823	0.4354	0	0	0	0	0	0	0	0	0
ENSG00000137965.11	ENST00000370747.9	0	2.67074	0.5626	0	0	0	0	0	0	0	0
ENSG00000137965.11	ENST00000446486.1	3.09651	0	0	0	0	0	0	0	0	0	0
ENSG00000162618.15	ENST00000656841.1	0.621307	0	0	0	0	0	0	0	0	0	0
ENSG00000117114.21	ENST00000370728.5	0	0	0	0	0	1.03799	0	0.786855	0	0	0
ENSG00000117114.21	ENST00000370730.5	0	0.639416	0	1.04766	1.66557	0	0.792947	0.742889	0	1.2252	0.372686
ENSG00000117114.21	ENST00000674442.1	0	0	0	0	0	0	0	0	0	0.600621	0
ENSG00000117114.21	ENST00000674419.1	0	0	0	0	0.624476	0	0	0	0	0	0
ENSG00000117114.21	ENST00000674307.1	0.453728	0	0	0.628278	0	0	0	0	0	0	0
ENSG00000117114.21	ENST00000319517.10	0	0	0	0	0	0	0	0	0.794366	0	0
ENSG00000117114.21	ENST00000370717.6	0	0	0	0.937631	0	0	0	0	0	0	0
ENSG00000117114.21	ENST00000627151.2	0	0.400209	0.755426	0	0	0.412144	0	0	0	0	1.03351
ENSG00000117114.21	ENST00000686636.1	0	0	0	0	0	0	0	0	0.491285	0	0
ENSG00000117114.21	ENST00000674393.1	0	0	0	0	1.15084	0.365701	0.405262	0.63463	0	0.681897	0
ENSG00000117114.21	ENST00000402328.2	1.55448	0.77251	1.57449	4.29217	4.10027	8.48211	0	0	0	0	0
ENSG00000142875.20	ENST00000370689.6	1.44133	0	0	0	0	0	0	1.61743	0.440469	0	0
ENSG00000142875.20	ENST00000370688.7	0	0	0.486839	0.669903	0	0.752136	0.696445	0	0	0	0
ENSG00000142875.20	ENST00000610703.4	0	1.9179	0	0	1.75168	0	0	0	0	0	0
ENSG00000142875.20	ENST00000614872.4	0	0	1.19232	0	0	3.37711	0	0	0	0	0
ENSG00000142875.20	ENST00000394839.6	0	0	0	0.842338	0	0	0	0	0.496978	0	0
ENSG00000142875.20	ENST00000610457.1	0	0	0	0	0	0	0	0	0	0.30668	0.286416
ENSG00000203943.9	ENST00000370668.7	0	0	1.39724	0	1.00967	1.07932	0	0	0	0	0
ENSG00000137976.8	ENST00000370662.3	0	0.868823	0	0	0	0	0	0	0	0	0
ENSG00000117133.11	ENST00000370654.6	1.35598	4.56382	6.64325	21.6452	17.854	27.1247	13.1377	16.3393	17.3356	10.4273	14.0084
ENSG00000174021.12	ENST00000370645.9	50.9416	54.9087	62.2527	640.02	496.375	439.822	452.563	512.607	473.31	469.271	503.832
ENSG00000174021.12	ENST00000370641.3	0	0	0	0	0	0	0	0	10.8798	6.30173	11.2163
ENSG00000174021.12	ENST00000686161.1	0	0	0	0	0	0	0	0.332222	0	0	0
ENSG00000117151.13	ENST00000370630.6	1.02488	0.388322	1.27573	0.26725	0	0.29614	0	0.969023	0	0	0
ENSG00000117155.17	ENST00000342203.8	0.558194	0.417281	0.732515	1.42155	0.635194	1.35803	1.46705	0.417933	1.86164	0.643799	0.617853
ENSG00000171517.6	ENST00000440886.1	0	0	0	2.14992	2.25806	1.60922	0	0	0	0	0
ENSG00000153898.13	ENST00000370608.8	0	0.273858	0	0	0	0	0	0	0	0	0
ENSG00000055732.13	ENST00000370589.7	0	0	0	0.433174	0.916077	0	0	0	0	0	0
ENSG00000097096.10	ENST00000341460.6	0	0	0	0	0.446677	0.238746	0.221068	0.440658	0	0.226364	0
ENSG00000162642.14	ENST00000471115.6	0.766658	0.25472	1.34144	0	0	3.31591	4.98937	3.82637	9.80139	5.5019	6.03447
ENSG00000142867.14	ENST00000648566.1	1.48594	0	0.623998	1.71727	3.6073	2.89212	1.78531	1.77934	1.48673	2.28511	2.19301
ENSG00000153904.21	ENST00000284031.13	8.82849	10.4362	10.0818	4.51514	3.47337	5.06316	7.66186	6.85441	7.98189	7.68093	4.03224
ENSG00000142871.18	ENST00000451137.7	2.69534	3.40639	3.29671	7.34483	20.2134	0	9.66305	0	0	0	0
ENSG00000117174.11	ENST00000431532.6	0.395096	0	0.138262	1.14151	1.79839	1.49524	1.17213	0.790175	0.658844	1.62023	1.55493
ENSG00000171502.15	ENST00000370571.7	0	0	0	0	0	0.189148	0.350285	0	0	0	0
ENSG00000122417.16	ENST00000359242.7	0.124109	0	0	0	0	0	0	0	0	0	0
ENSG00000122417.16	ENST00000370566.7	0	0	0	0.582035	0	0	0	0	0	0	0
ENSG00000122417.16	ENST00000696304.1	0.518175	0	0	0	0	0	0	0	0	0	0
ENSG00000122417.16	ENST00000294678.6	0	0	0.216649	0	0	0	1.31825	0	1.57062	0	0
ENSG00000122417.16	ENST00000317336.11	0	0.369579	0	0	0	0	0	0.944963	0	0.846364	0
ENSG00000097033.14	ENST00000535010.5	1.9269	0	1.07892	0	0	0	0	0	4.50065	0	0
ENSG00000097033.14	ENST00000370558.8	0	1.75042	0	3.55011	4.57593	5.0936	5.86695	8.73586	0	5.61013	3.73693
ENSG00000097033.14	ENST00000482504.1	0	0	0	6.89789	4.67467	11.7529	10.8803	15.2064	9.42443	4.8982	15.2874
ENSG00000183291.18	ENST00000331835.10	14.7145	0	4.28228	44.5428	46.9376	58.0532	47.0943	29.7511	27.3715	26.9222	20.3611
ENSG00000183291.18	ENST00000370554.5	13.6247	29.2244	27.7458	74.0351	41.2749	76.1436	45.0085	54.0992	53.8681	92.6154	68.6146
ENSG00000153936.18	ENST00000370550.10	0	1.0582	0	0	0	0	0	7.89012	0	0	0
ENSG00000153936.18	ENST00000370551.8	0	2.29172	0	2.49107	1.74425	0	1.73904	4.93254	0.958513	2.65182	0
ENSG00000153936.18	ENST00000690674.1	0	0	0	0	0	0	0	0	0	3.61498	0
ENSG00000267561.2	ENST00000370548.3	0	0	0	0	1.32104	0	0	0	0	0	0
ENSG00000143013.13	ENST00000370544.10	1.74823	0.968086	0.922739	5.0529	11.8605	8.15367	7.05053	3.14986	4.31896	7.96589	8.37116
ENSG00000143013.13	ENST00000370542.1	1.67125	0	2.84706	2.62479	5.7158	0	0	0	0	0	0
ENSG00000065243.20	ENST00000370521.8	1.18732	0.525981	0.276999	2.09637	1.80148	2.35371	1.9813	1.38455	2.41991	2.63739	0.5841
ENSG00000137947.12	ENST00000370500.10	2.27536	1.70096	4.18033	9.88132	19.2485	10.1488	6.37161	6.81159	15.219	14.8763	16.794
ENSG00000137944.18	ENST00000260508.9	2.45196	1.95513	3.60373	3.54201	3.72017	5.56754	7.37273	5.87206	8.17735	5.94926	3.61867
ENSG00000213516.10	ENST00000652648.1	0	0.360596	0	0	0.802977	0	0.77139	0	0.572673	0	0
ENSG00000213516.10	ENST00000321792.5	0.369533	0	0.958736	0.49283	0	0.559029	0	0.515712	0	0.811199	0
ENSG00000117226.12	ENST00000370481.9	0	1.69993	0	0	0	0	0	0.412287	0	0	0
ENSG00000117228.11	ENST00000370473.5	4.37321	3.48717	1.83646	0.421169	0	3.78295	0.437856	0.436392	0	0	0
ENSG00000162645.13	ENST00000370466.4	0	0	0	0	0	0	0	0	0	2.15332	1.77277
ENSG00000213512.3	ENST00000294671.3	11.2883	9.17051	5.1846	0	0	0	0	0	0	0	0
ENSG00000162654.9	ENST00000355754.7	0	0	0.153946	0	0	0	0	0	0	0	0
ENSG00000154451.15	ENST00000370459.8	0	0.116629	0	0	0	0	0.178939	0	0.226052	0	0
ENSG00000154451.15	ENST00000443807.1	0	0	0	0	0	0	0	0.258305	0	0	0
ENSG00000197147.15	ENST00000330947.7	0.103565	0	0.108727	0.149609	0.157135	0.503926	0.622151	1.39516	0.3454	1.27411	0.458536
ENSG00000171488.15	ENST00000370454.9	0	0	0	0.320578	0.505053	0.71986	0	0	0	0.170632	0
ENSG00000171492.14	ENST00000525774.5	0	0	0	0	0	0	0	0	0	10.4508	0
ENSG00000171492.14	ENST00000337338.9	0.830129	0	0	1.6413	2.51858	0	0	3.10622	0	0	5.67954
ENSG00000171492.14	ENST00000394593.7	0	1.23616	2.34362	2.69613	0	3.21845	3.74067	0	5.7907	4.95874	0
ENSG00000162664.17	ENST00000340281.9	0.324025	1e-06	2e-06	1.58683	2e-06	2e-06	0.763551	0.970005	1.54234	0.455961	0.358654
ENSG00000162664.17	ENST00000370447.3	1e-06	0.410778	0.455317	1e-06	1.26795	0.6781	1e-06	1e-06	1e-06	1e-06	1e-06
ENSG00000122482.22	ENST00000347275.9	5.02746	2.99834	4.96266	5.37665	3.02719	10.2328	0	0	0	2.93676	0
ENSG00000122482.22	ENST00000337393.10	0	0	0	0.284204	0.298819	0.310389	0.685603	0.651619	2.17785	1.01672	0.881594
ENSG00000162669.16	ENST00000370425.8	0	0	0	0.477144	0	0	0	0	0	0	0
ENSG00000097046.13	ENST00000234626.11	0	0	0	2.2443	1.57194	2.51963	1.55538	0.387544	0	0	0
ENSG00000069702.11	ENST00000212355.9	2.14366	0.628435	0.66191	1.09296	0.573969	1.63617	6.0435	7.92828	5.46941	17.4395	13.0383
ENSG00000137948.19	ENST00000402388.1	0	0	0	1.00706	0	0	0	0	0	0	0
ENSG00000137948.19	ENST00000680194.1	0	0	0	9.42545	3.10733	6.6252	0	0	0	0	0
ENSG00000172031.7	ENST00000370383.5	0	0	0	12.1497	4.90799	7.34521	0	0	0	0	0
ENSG00000189195.15	ENST00000370378.5	0	0	0	0	0	0	0	0	0	0	0.25917
ENSG00000189195.15	ENST00000637221.2	0	0.190264	0	0	0.289624	0	0	0	0.318313	0.293548	0
ENSG00000174842.17	ENST00000370360.8	0	0	0	0	0	0	0	5.23372	0	0	0
ENSG00000122484.9	ENST00000610020.2	1.8e-05	0.098648	0.145262	0.493552	0.491119	0.374035	0.077152	0.437906	0.459471	0.408829	0.367461
ENSG00000162676.13	ENST00000294702.6	0	0.177801	0	0.257691	0	0	0.267901	0.600059	0	1.09728	0
ENSG00000162676.13	ENST00000696667.1	0	0	0	0	0	0.932987	0	0	0	0	0
ENSG00000162676.13	ENST00000427103.6	0	0	0	0	0	0	0	1.28098	1.0369	0	0.917691
ENSG00000067208.16	ENST00000370331.5	0.32203	0.748967	0.788851	0.465205	0.325736	1.21873	0.161212	0	0	0.495223	0.633687
ENSG00000122406.14	ENST00000370321.8	165.422	178.586	156.52	805.891	769.923	592.589	1254.01	1138.46	1476.83	2127.51	2046.96
ENSG00000122406.14	ENST00000315741.5	0	0	0	0	0	0	0	0	5.99305	0	0
ENSG00000154511.12	ENST00000613902.4	0	0	4.35983	0	0	0	0	0	0	0	0
ENSG00000154511.12	ENST00000616709.4	2.12657	1.758	0	5.70833	0	3.43281	2.64886	1.584	2.35297	5.9671	3.64492
ENSG00000154511.12	ENST00000370310.5	0	0	0	0	4.58523	0	0	0	0	0	0
ENSG00000143033.18	ENST00000540243.5	0.213553	0.638571	1.12098	4.94207	1.62022	4.85085	3.52793	0.958946	3.91721	2.29883	0
ENSG00000143033.18	ENST00000545708.5	0	0	0	0	0	0	0	0	0	0	1.49243
ENSG00000117500.13	ENST00000370282.8	3.25938	2.82411	2.05436	2.14257	3.47223	1.76006	2.26352	4.7669	3.83513	4.62735	4.03579
ENSG00000117500.13	ENST00000479918.5	0	5.75501	0	0	0	0	0	0	0	0	0
ENSG00000122483.18	ENST00000343253.11	0	0	0	0	0	0	0	0	0	0.257188	0
ENSG00000122483.18	ENST00000448243.6	0	0	0	0	0	5.04266	0	0	0	0	0
ENSG00000122483.18	ENST00000690025.1	0	0	0	0.498243	0	0	0	0	0	0	0
ENSG00000117505.13	ENST00000370272.9	1.01095	0.361544	0.195752	0.91541	0.964582	0.729841	1.55834	0.402477	2.32528	0.979386	0.541081
ENSG00000117505.13	ENST00000370267.1	0	2.92138	0.924017	8.61097	10.7146	14.7659	5.80225	7.84583	2.81127	5.58435	2.66353
ENSG00000137942.18	ENST00000260506.12	0	0.901925	0.491533	0.57554	0	1.5633	1.58562	2.70885	2.0119	2.3217	1.55802
ENSG00000137942.18	ENST00000370253.6	0.421942	0	1.08428	3.76734	3.25325	4.9989	0	0	0	0	0
ENSG00000137936.18	ENST00000260502.11	0	0	0	0	3.51893	0	0	0	0	0	0
ENSG00000137936.18	ENST00000370247.7	1.78728	1.18764	1.2509	0	0	0	1.78947	2.22936	0.496731	0	0
ENSG00000137936.18	ENST00000539242.5	0	0	0	4.16094	0	2.00355	0	0	0	0	0
ENSG00000137936.18	ENST00000370243.1	0	0	0	0.688051	0	0	0	0	0	2.00092	2.30434
ENSG00000067334.14	ENST00000436063.7	0	0	0.275429	1.88631	2.84387	2.89582	1.2281	0.485082	0.309454	0	0
ENSG00000023909.10	ENST00000370238.8	3.00196	1.98213	1.39181	7.78847	11.3254	11.8264	8.9597	5.47843	1.25041	1.99346	2.51335
ENSG00000023909.10	ENST00000615724.1	0	0	0	0	0	0	0	0	5.7907	2.21622	2.82228
ENSG00000198691.14	ENST00000370225.4	0	0	0	0	0	0	0.16292	0	0	0	0
ENSG00000198691.14	ENST00000649773.1	0	0	0	0.388431	0	0	0	0	0	0	0
ENSG00000137962.13	ENST00000260526.11	0.794142	1.14336	0.648448	0.637343	1.07104	1.28804	0.934366	0.39623	0.441425	0	0.26045
ENSG00000137962.13	ENST00000370217.3	0	0.426663	0	0	0	0	0	0	0	0	0
ENSG00000117528.14	ENST00000370214.9	0	0	0	10.2587	16.5527	0	13.6391	12.5239	0	9.04596	0
ENSG00000117528.14	ENST00000647998.2	11.441	7.23828	9.33012	0	0	17.0414	0	0	14.5587	0	7.94369
ENSG00000117528.14	ENST00000315713.5	0	0	0	5.81786	4.3064	0	0	0	2.01665	2.42368	0
ENSG00000117525.14	ENST00000334047.12	0	0	0	0	3.98053	10.2863	0	0	1.24995	0	0
ENSG00000117525.14	ENST00000370207.4	0	0	0.98921	1.36118	0	0	0	0	0	0	0
ENSG00000143036.17	ENST00000446120.6	0	0	0	0	10.1043	0	0	0	0	1.28015	0
ENSG00000143036.17	ENST00000527077.5	1.35998	0.45185	0	0	0	0	0.680822	0	6.04757	0	0.669037
ENSG00000143036.17	ENST00000529450.5	0	0	0	0	0	0	0	1.92511	0	0	0
ENSG00000143036.17	ENST00000467909.5	0	0	0	4.2856	0	12.3729	0	0	0	0	0
ENSG00000117519.16	ENST00000545882.5	0	12.0501	13.3311	51.4735	60.7178	50.4883	37.525	42.5643	43.6938	32.1491	0
ENSG00000117519.16	ENST00000394202.8	0	0	0	0	0	0	4.86859	0	0	0	22.4565
ENSG00000117519.16	ENST00000370206.9	11.0209	0	0	0	7.94004	0	0	0	9.27747	0	0
ENSG00000172339.10	ENST00000370205.6	0.673185	0.922613	0.441708	2.06669	0.766047	1.77427	1.01101	1.25955	1.82418	1.68226	1.36608
ENSG00000152078.10	ENST00000370203.9	9.90487	10.5184	10.3826	2.87662	2.48813	6.25098	0.719054	0.876645	1.00086	1.08079	1.55585
ENSG00000271092.5	ENST00000604534.5	0	0	0	0	0	1.10053	0	0	0	0	0
ENSG00000122481.17	ENST00000370202.5	0	2.77006	0	5.45107	5.02633	2.67203	7.3244	14.8158	4.70622	6.34234	12.1735
ENSG00000117569.19	ENST00000609116.5	3e-06	0	0	0	1e-06	4e-06	5e-06	0	0	2e-06	4e-06
ENSG00000117569.19	ENST00000370197.5	0	0	0	0	0	0	0	0	0	0	0.807212
ENSG00000117569.19	ENST00000370198.5	0	0	0	0	0	0.888065	0.41114	0.409788	0	0	0
ENSG00000117569.19	ENST00000675401.1	0.288032	0	0	0	1.31113	0	0	0	0	0.88592	0
ENSG00000188641.14	ENST00000370192.8	5.33688	6.23069	6.56708	0.265778	0.558293	1.19362	0.276309	0	0.613595	0.583379	0.814578
ENSG00000188641.14	ENST00000306031.5	0.530345	1.20581	0.526932	0	0.761541	2.44223	0	0.751279	0.836976	0	0
ENSG00000162627.17	ENST00000529992.5	0	0	0	18.1288	22.6691	19.3195	8.60681	15.4405	0	6.38192	10.8978
ENSG00000162627.17	ENST00000306121.8	0	0	0	5.31439	0	6.0437	0	0	17.2236	0	0
ENSG00000099260.12	ENST00000263174.9	5.92375	2.93694	5.02691	7.44893	5.39611	12.545	3.31967	3.30787	9.23158	1.6992	3.80501
ENSG00000099260.12	ENST00000605497.5	0	0	0	0	1.02693	0	0	0	0	0	0
ENSG00000156869.14	ENST00000646001.2	2.51392	1.59418	1.19935	1.48531	0.866675	2.971	0.687717	0.683997	0.762019	0.52773	0.505809
ENSG00000162688.17	ENST00000361915.8	0	0	0	0.469419	0	0	1.51707	0	0.935817	0	0
ENSG00000162688.17	ENST00000370165.7	0	0	0	0	0	0.83315	0	0	0	0	0
ENSG00000162688.17	ENST00000370163.7	2.36611	0	1.8	0	0	0	0	0	0	0	0
ENSG00000162688.17	ENST00000294724.8	0	0	0	0	0.616237	0	0	0	0	0	0
ENSG00000162688.17	ENST00000370161.6	0	0	1.39627	0.51609	1.00795	1.01026	0	0.861145	0	0	0
ENSG00000117620.15	ENST00000533028.8	0.079468	1.3e-05	1.5e-05	1.6e-05	2e-05	2.1e-05	1.4e-05	1.7e-05	2.5e-05	2.2e-05	2.1e-05
ENSG00000117620.15	ENST00000640715.1	0	0	0	2.55021	0	0	0	3.303	0	1.02513	0
ENSG00000117620.15	ENST00000465289.6	1.55356	1.39213	0.561787	0	0	0	0	0	0.490368	0.322892	0.671015
ENSG00000117620.15	ENST00000638988.1	0	0	0	0	0	0	0	0	0	1.13881	1.09291
ENSG00000117620.15	ENST00000640600.1	3.3719	1.2608	3.02759	1.43508	2.63776	2.4169	0	1.1152	0	0	0
ENSG00000117620.15	ENST00000370153.6	0	0	1.41667	0	0	0	1.69011	0	0	0	0
ENSG00000156875.14	ENST00000370152.8	2.49392	1.09761	1.59341	5.762	6.44751	7.54133	7.4329	6.81496	11.4484	7.46841	9.85521
ENSG00000156876.10	ENST00000287482.6	0	0.212679	0	2.29076	2.26621	1.03824	1.60227	1.91629	2.13488	1.31252	0.94472
ENSG00000122435.11	ENST00000370141.8	0.533482	0.265868	0.84009	0.770656	0.404709	2.59792	0.400595	0.399255	0.889596	2.05096	1.57464
ENSG00000137992.15	ENST00000370132.8	1.16465	1.52361	1.53047	0.525762	0.552767	0.708363	0.546594	0.653719	0.849669	0.223875	0.214853
ENSG00000137996.13	ENST00000370128.9	1.01177	0	0.675696	3.17357	4.51336	6.05498	0.908606	3.45551	1.005	2.25637	0.878722
ENSG00000137996.13	ENST00000260563.4	0	2.38267	3.19446	14.2327	19.4314	31.9194	10.0577	6.67917	12.1709	6.54705	15.2006
ENSG00000079335.20	ENST00000336454.5	0	0	0	0.557187	0.585212	2.81513	0	0	0.32159	0.29657	0.569236
ENSG00000181656.7	ENST00000315033.5	1.6576	0.708079	0	0	0	0	0	0	0	0	0
ENSG00000162692.12	ENST00000370115.1	0	0.34386	0.362177	0	0	0	0	0	0	0	0
ENSG00000162694.14	ENST00000370114.8	0.298112	0	1.97093	3.02149	4.52313	1.93406	2.68629	0.895057	1.98847	3.34155	2.19982
ENSG00000162695.12	ENST00000370112.8	0.702778	0.800558	0.3162	0.290066	0.609312	1.30269	0.452482	0	0.502251	0	1.03719
ENSG00000162695.12	ENST00000357650.9	0	0	0	0	0	0	0	0.433484	0	0.593811	0
ENSG00000117543.22	ENST00000370109.8	1.01111	1.72034	1.81197	0	10.7388	4.09986	17.4101	7.61571	1.59536	3.39258	2.27092
ENSG00000117543.22	ENST00000427040.3	0	0	0	11.0094	0	0	0	0	0	0	0
ENSG00000117543.22	ENST00000342173.11	0	0	0	0	0	0	0	8.91778	13.0458	20.4497	14.1815
ENSG00000170989.10	ENST00000305352.7	2.72954	1.21065	1.59392	0	0	0	0	0	0	0	0
ENSG00000118733.17	ENST00000370103.9	0	0	0	0	0.399574	0.427139	0	0	0	0	0
ENSG00000118733.17	ENST00000338858.9	0	0	0	0.571834	0	0	0	0	0	0	0
ENSG00000185946.16	ENST00000524631.5	0	0.433919	0	0	0	0	0	0	0	2.00841	1.92746
ENSG00000185946.16	ENST00000423855.7	0.405243	0	0.425439	2.34165	3.07429	1.31455	2.43474	2.42629	2.02729	0	0
ENSG00000240038.7	ENST00000684275.1	0.287616	1.14672	0.6039	0	0	0	0	0	0	0	0
ENSG00000243480.8	ENST00000414303.7	0.287616	0	0.6039	0	0	0	0	0	0	0	0
ENSG00000187733.7	ENST00000370079.3	0	0	0	0	0	0.900606	0	0	0	0	0
ENSG00000198890.9	ENST00000370078.2	0	1.61348	2.71908	0	0	0	7.29329	4.36135	8.63793	2.98721	1.91121
ENSG00000134215.16	ENST00000370056.9	0	0	0	0	0	1.30395	0	0	2.147	0.741798	0
ENSG00000134215.16	ENST00000527011.5	0	0	0	0.260352	0.273447	0	1.08267	0.539524	0	0	0
ENSG00000085491.17	ENST00000569674.1	0	0	0	0	0	0	0.695699	0	1.21497	0	0
ENSG00000196427.14	ENST00000415641.8	0	0	0.587141	0	0	0	0	0	0	0	0
ENSG00000186086.19	ENST00000495380.7	0	0.596798	0	0	0	0	0	0	0	0	0
ENSG00000162636.16	ENST00000405454.1	0	0	0	0.830358	0	0	0	0	0	0	0
ENSG00000162636.16	ENST00000370035.8	0.143942	0.143473	0	0	0	0.46693	0.216178	0.215455	0	0	0
ENSG00000134186.12	ENST00000370025.9	0.502802	0	0	0.968449	1.14052	0	0	1.50556	1.05068	4.21486	0
ENSG00000134186.12	ENST00000370022.9	0	0.570368	0	0	0	0	0	0	0	0	0
ENSG00000134186.12	ENST00000370021.1	0	0	1.85394	0	2.59152	4.65421	4.6411	0	1.92898	0	5.2123
ENSG00000116266.11	ENST00000370008.4	2.49239	4.10054	1.79957	1.981	3.12641	6.11648	6.69333	2.05296	3.43011	3.69045	4.55363
ENSG00000121957.15	ENST00000406462.6	0	0	0	0	0.867997	0.520173	0	0	0.307812	0	0
ENSG00000121957.15	ENST00000441735.2	0	0	0	0	0.763796	0	0	0	1.35639	0	0
ENSG00000121957.15	ENST00000642355.1	0	0	0	0	0	0	0.244629	0	0	0	0
ENSG00000121957.15	ENST00000645164.2	0	0.299346	0	1.84831	0	0	0	0	2.69126	1.38554	0
ENSG00000121957.15	ENST00000264126.9	0	0	0	0.440347	0	0	0.493044	0	0	0	0
ENSG00000121957.15	ENST00000675086.1	0	0	0	0	0	0	0	0	0.767931	0	0
ENSG00000121957.15	ENST00000676184.1	0	0	0	0	0	0.999627	0	0.922517	0	0	0
ENSG00000121957.15	ENST00000446797.2	0	0	0	0	0	0	1.92364	0	0	0	0
ENSG00000121940.17	ENST00000685497.1	0	0	0	0	1e-06	0	0	0	0	0	1e-06
ENSG00000121940.17	ENST00000686776.1	0	0	0	0	0	0.68643	0.155312	0	0	0	0
ENSG00000121940.17	ENST00000692342.1	0	0	0	0	0	0.770397	1e-06	0	0	0	0
ENSG00000121940.17	ENST00000687734.1	0	0	0	0	0.191976	0	0	0	0	0	0
ENSG00000121940.17	ENST00000688778.1	0	0	0	0	0	0	0	0	0	0.670739	0.625283
ENSG00000121940.17	ENST00000685104.1	0	0	0	1e-06	0.421448	0	0	0	0	0	0
ENSG00000121940.17	ENST00000689103.1	0	1e-06	1e-06	1e-06	0	0	1e-06	0	0	0	0
ENSG00000121940.17	ENST00000687591.1	0	0	0	0.451076	0	0	0	0	0.631599	0	0
ENSG00000121940.17	ENST00000691777.1	0	0	0.142873	0	0	0	0	0	0.31752	0	0
ENSG00000121940.17	ENST00000690756.1	0	0	0	0	0	0	0	0.40369	0	0	0
ENSG00000121940.17	ENST00000689991.1	0	0	0	1e-06	1e-06	1e-06	0	0	0	0	0
ENSG00000121940.17	ENST00000691513.1	0	0	0	1e-06	0	0	0	0	0	0	0
ENSG00000121940.17	ENST00000686821.1	0	0	0	0	0	0	0.278238	1e-06	0	0	0
ENSG00000121940.17	ENST00000692511.1	0	0	0	0.314345	0	0	0	0	0	0	0
ENSG00000121940.17	ENST00000689479.1	0	0	0	0	1e-06	0	0	0	0	0	0
ENSG00000121940.17	ENST00000687646.1	0	0	0	1e-06	1e-06	0	1e-06	0	0	0	0
ENSG00000121940.17	ENST00000687226.1	0	0	0	0	0	0	0	0.264822	0	0	0
ENSG00000121940.17	ENST00000693336.1	0	0	0	0.335979	0	0	2e-06	0.320259	1e-06	0	1e-06
ENSG00000121940.17	ENST00000685540.1	0	0	0	0	1e-06	0	0	0	0	0.199983	0
ENSG00000121940.17	ENST00000685014.1	0	0	0.197961	0.327973	0	0	0	0	0	0	0
ENSG00000121940.17	ENST00000687328.1	0	0	0	0	0	0.381004	0	0	1e-06	1e-06	0.660403
ENSG00000121940.17	ENST00000690781.1	0	0	0	0	0	0	0.230264	0	0	0	0
ENSG00000121940.17	ENST00000688285.1	0.225995	0	0.18631	0	0	0	0	0	0	0	0
ENSG00000121940.17	ENST00000687449.1	0	0	0	0	0	1.03081	0	0	0	0	0
ENSG00000121940.17	ENST00000687099.1	0	0.227635	0	0	0	0.43242	0	0	0	0	0
ENSG00000121940.17	ENST00000685791.1	0	0	0	0	0.360897	0	0	0	0	0	0
ENSG00000121940.17	ENST00000691556.1	0	0	0	0	0	0	0	0.334144	0	0	0
ENSG00000121940.17	ENST00000369969.7	0	0	0	0.486109	0	0	0	0	0.539751	0	0.39538
ENSG00000121940.17	ENST00000356970.6	0	0	0	0	0.509686	0	0.896188	0	0	0	0
ENSG00000121940.17	ENST00000675571.1	0.340848	0	0	0	0	0	0	0	0	0	0
ENSG00000121940.17	ENST00000675650.1	0	0.35651	0	0	0	1.16026	0	0	0	0	0
ENSG00000121940.17	ENST00000675654.1	0	0	0	0.629084	0.830431	0	0	0	0	0	0
ENSG00000121940.17	ENST00000675790.1	0	0.780653	0.411119	0	0	0	0	0	0	0	0
ENSG00000121940.17	ENST00000675584.1	0	0	0	0.552185	0	0	0	0	0	0	0
ENSG00000121940.17	ENST00000676392.2	0	0	0	0	0	0	0	0.877659	0	0	0
ENSG00000121940.17	ENST00000675956.1	0	0	0	0	0	0	0.700247	0	0	0	0
ENSG00000121940.17	ENST00000686078.1	0	0	0	0	0	0	0	0	0	0.409197	0
ENSG00000085433.17	ENST00000361054.7	0.198638	0	0.208538	0.573905	0.602772	2.25524	0	0.297325	0.33124	0	0
ENSG00000197780.11	ENST00000461096.7	1.92949	0.641066	2.70097	5.58255	5.48035	17.7338	5.32658	5.77616	2.14501	2.47266	3.32221
ENSG00000215717.7	ENST00000338272.9	4.87838	2.12663	3.5193	6.18048	4.16128	3.95409	2.51713	4.58986	2.79488	6.0931	5.42934
ENSG00000116299.17	ENST00000529753.5	0	0	0	0	0	0	0	0.433103	0	0	0
ENSG00000031698.13	ENST00000234677.7	0	0	0	0	0	0	0	0	37.6312	0	57.2659
ENSG00000031698.13	ENST00000369923.4	5.17286	12.657	7.40544	12.9074	11.4161	20.5481	26.6825	18.2037	0	60.3644	0
ENSG00000143126.8	ENST00000271332.4	0	0	0	3e-06	0.432903	0.694151	0.857004	0.320302	0.475784	0.148422	0
ENSG00000134222.16	ENST00000369904.7	0	0	0	0	0	1.86597	0	0	0	0	0
ENSG00000134222.16	ENST00000369909.7	0	0	0	0	5.71362	0	0	0	0	0	0
ENSG00000134222.16	ENST00000369907.7	0	0	0	6.04555	0	0	10.0289	7.8309	10.381	0	3.86018
ENSG00000134222.16	ENST00000369903.6	0	0	0	0	0	0	0	0	0	2.42493	0
ENSG00000221986.7	ENST00000357155.2	0	0	0	0	0	0	0	1.05165	0	0	1.03692
ENSG00000134243.12	ENST00000256637.8	0.11392	0.113549	0.119597	1.81026	2.76571	1.34588	4.97753	5.13975	3.42001	4.44659	3.69897
ENSG00000143106.13	ENST00000271308.9	1.7592	0.29843	0.690522	3.11976	1.56603	1.63791	0.445868	2.57792	2.88197	1.00498	0.964343
ENSG00000143028.9	ENST00000369872.4	0.222332	0	1.63389	0	0	0	0.333906	0.33279	0	0.341906	0
ENSG00000162650.17	ENST00000683729.1	0	0	0	0	0	0	1.04894	0	0	0	0
ENSG00000162650.17	ENST00000369870.7	0	0.369953	0	0	0	0	0	0	0	0	0
ENSG00000174151.15	ENST00000420578.7	0.164687	0.16415	0.345789	0.475813	0.499746	0.267111	0.247333	0.493012	0.549291	0.759774	1.21526
ENSG00000181754.7	ENST00000369864.5	0	0.156819	0	0	0	0	0	0	0	0.483894	0.232196
ENSG00000065135.12	ENST00000369851.7	1.7463	0.783275	1.19167	6.18062	5.96474	5.52314	3.27832	2.61848	4.11858	3.89396	3.22675
ENSG00000134183.13	ENST00000351050.8	0	0.677375	0	0	0	0	0	0	0	0	0
ENSG00000116337.20	ENST00000667949.2	0	0	0	0	0	0	0.62664	0	0	0	0
ENSG00000116337.20	ENST00000342115.8	0	0	0.632691	3.33395	1.37739	0	3.63545	4.50013	1.19876	0	1.46778
ENSG00000116337.20	ENST00000528667.7	0	0	0	1.05917	0	2.74651	0	0	1.82294	2.30015	1.44719
ENSG00000116337.20	ENST00000256578.8	0.951566	0	0	0	1.24353	0	0	0	0.865021	0	0
ENSG00000116337.20	ENST00000476688.3	0	0.48243	0	0	0	0	0	0	0	0	0
ENSG00000168765.18	ENST00000369836.9	0	0	0	3.43698	4.63467	0	8.05808	11.7967	4.55342	1.20355	4.94912
ENSG00000168765.18	ENST00000326729.9	1.43271	0	0.752058	0	1.0869	1.16188	1.07585	2.14451	4.77826	4.17871	1.05723
ENSG00000168765.18	ENST00000369833.5	0	0	0	0	0	0	0	0.35434	0	0.329454	0
ENSG00000213366.13	ENST00000369827.7	0	0	0	0	0	2.21046	0	4.5353	1.55409	2.86637	0
ENSG00000213366.13	ENST00000241337.9	0	0	0	4.14859	0	0	1.2577	0	0	0	0
ENSG00000134184.13	ENST00000309851.10	0	0	0	34.3047	0	28.8197	0	0	0	0	0
ENSG00000134184.13	ENST00000349334.7	0	0	0	0	30.1771	0	0	0	0	0	0
ENSG00000134201.12	ENST00000256593.8	1.17063	0	0	0	0	0	0	0	0	0	0
ENSG00000134202.12	ENST00000256594.7	0	0.246452	0	2.3637	2.36688	2.55448	0.358903	1.1547	0.841792	0.776013	0.740943
ENSG00000198758.11	ENST00000361852.8	0	0	0	7.73475	7.87012	7.28385	7.9708	5.50084	4.76948	5.65044	6.62777
ENSG00000184371.14	ENST00000329608.11	0.820225	0.408776	0.441793	0.888672	1.55562	0.665174	2.77165	1.53466	1.36777	2.83805	2.1196
ENSG00000184371.14	ENST00000369802.7	0	0	0	0.496357	0.521323	0	0	0	0	0	0
ENSG00000168710.18	ENST00000369799.10	3.11831	4.35141	6.11093	8.67145	11.5477	11.8013	12.826	11.2034	10.0654	7.99305	7.05659
ENSG00000143093.15	ENST00000369796.5	0.267015	1.06458	0.280322	2.31438	1.21539	2.1654	3.13361	2.39803	2.22631	2.8744	2.36443
ENSG00000116396.15	ENST00000438661.3	0	0	0	0	0	0	0	0	0	0.303584	0.582568
ENSG00000116396.15	ENST00000369787.7	0	0	0	3.9e-05	0.188934	5.7e-05	0	0	5.8e-05	0.063831	2.8e-05
ENSG00000116396.15	ENST00000413138.7	0	0	0	0.80101	0	0	0	0	0	0	0
ENSG00000162775.17	ENST00000652747.1	0	0	0	0	0	0	0	0	1.98027	1.21747	0
ENSG00000162775.17	ENST00000654015.1	0.777	0	0	1.4966	0	0	1.5559	0	0	0	0
ENSG00000162775.17	ENST00000617047.1	0	0	0	0	0.767836	5.33509	0	0	0	0	0
ENSG00000168679.18	ENST00000437429.6	0	2.16326	2.27849	0	0	0	0	0	0	0	0
ENSG00000168679.18	ENST00000369781.8	0	0	0	0	0.635656	0	0	0	0	0	0
ENSG00000168679.18	ENST00000467986.2	0	0.944979	0	0	0	0	0	0	0	0	0
ENSG00000134248.14	ENST00000483260.5	0	0	0	0	0	0	25.6533	0	8.63772	0	0
ENSG00000134248.14	ENST00000474861.6	0	0	0	0	1.77814	0	0	0	0	1.81113	0
ENSG00000134248.14	ENST00000602318.6	48.6233	74.6334	73.8771	286.874	242.524	298.551	219.501	252.955	305.648	145.422	244.12
ENSG00000134248.14	ENST00000256644.8	2.28791	2.26173	0	0	0	0	12.7182	0	3.70453	0	0
ENSG00000134248.14	ENST00000602858.5	12.1447	0	0	0	0	0	0	0	0	0	0
ENSG00000143119.14	ENST00000271324.6	0	1.21884	1.92565	0	0	0	0	0	0	0	0
ENSG00000121931.16	ENST00000369763.5	0	0	0	0.615468	0	0	0.650614	5.25209	0.724868	11.5628	8.73892
ENSG00000121931.16	ENST00000494675.5	2.77066	0	0	0	0	0	8.51046	0	8.67808	0	0
ENSG00000121931.16	ENST00000485275.2	0	0.494786	2.60571	3.80072	3.76586	4.83079	0	0	0	0	0
ENSG00000156171.15	ENST00000484310.6	4.20188	0	0	7.80295	7.56187	8.75716	4.36625	0	8.7089	10.2199	7.35543
ENSG00000156171.15	ENST00000539140.6	0	4.24483	1.49021	0	0	0	0	6.64912	0	0	0
ENSG00000162777.17	ENST00000369752.5	0	1.39593	3.43066	0	0	0	0	0	0	0	0
ENSG00000085465.13	ENST00000369732.4	0.78884	2.75194	2.07038	1.13956	2.39375	1.27944	0	1.18075	0.657716	0.606545	0.5821
ENSG00000116455.14	ENST00000235090.10	1.39182	4.11711	1.82648	20.0687	18.452	25.3961	26.9145	30.8523	33.7456	12.51	16.9463
ENSG00000116459.11	ENST00000369722.8	2.67477	3.80281	2.60628	12.4083	10.9133	5.37488	15.1711	13.0779	14.5071	11.0763	10.3141
ENSG00000143110.12	ENST00000369718.4	0	2.5903	0	0	0	0	0	0	0	0	0
ENSG00000116473.15	ENST00000356415.5	17.6916	13.7444	11.9158	19.088	20.8086	30.7259	23.3322	21.9326	19.1559	6.84328	11.0198
ENSG00000116473.15	ENST00000369709.4	1.32228	0	0.209507	0.287915	0.972803	1.04935	0	0.298188	0	0.310133	0
ENSG00000197852.12	ENST00000357260.6	0	0	0	0.194556	0.408684	0.546994	0.239441	1.00794	0.673749	0.414221	0
ENSG00000197852.12	ENST00000534365.1	0	0	0	0	0	1.95155	0	0	0	0	0
ENSG00000064703.13	ENST00000679724.1	0	0	0	1.34917	0	0	0	0	0	0	0
ENSG00000064703.13	ENST00000369702.5	0	0	0	0	2.20883	1.94352	0.916271	0	1.91073	1.06222	1.13961
ENSG00000171385.10	ENST00000369697.5	0.967669	0.74969	1.12803	0	0	0	0	0	0	0	0
ENSG00000143079.15	ENST00000271277.11	0	0.136319	0.143581	0.395141	0.415016	0.443647	0.616196	0	0.912251	0.630958	1.01187
ENSG00000134245.18	ENST00000369686.9	0	0	0	0	0	3e-06	0	0.125342	0	0	0
ENSG00000134245.18	ENST00000369684.5	0	0	0	0	0	3e-06	0	1e-05	0	0	1e-06
ENSG00000007341.19	ENST00000358039.9	0	0	0	0	0	0	0.575793	0	0	0	1.37588
ENSG00000007341.19	ENST00000360743.8	0	0	0	0	0.294455	0.944288	0	1.69666	0	0.596888	0
ENSG00000007341.19	ENST00000369666.5	0	0	0	0	0	0	0	0	1.63547	0	0
ENSG00000116489.13	ENST00000263168.4	4.40525	7.98461	5.35177	22.0107	26.5945	33.075	20.1051	21.8326	28.1325	18.4834	15.4333
ENSG00000155363.19	ENST00000413052.6	0	0	0	0	0	0	6.51671	0	0	0	0
ENSG00000155363.19	ENST00000369645.6	0.320935	0	1.109	5.59108	4.70666	5.17151	0	2.93709	6.80505	5.08602	3.26563
ENSG00000155363.19	ENST00000369644.5	0	2.21585	0	0	1.20382	0	0	0	0	0	0
ENSG00000155363.19	ENST00000357443.2	0	0	0	1.44013	0	0	0	0	0	0	0
ENSG00000155366.17	ENST00000369633.6	0	0	0	0	3.76402	0	0	0	0	4.53425	0
ENSG00000155366.17	ENST00000339083.12	17.5583	29.9824	16.7186	138.027	160.702	229.782	74.9835	82.28	55.1451	52.094	61.6613
ENSG00000155366.17	ENST00000369642.7	0	0	0	0	0	0	3.13238	0	9.15259	0	0
ENSG00000155367.16	ENST00000309276.11	0	0	0	2.27172	0	0.850197	0	0	0	0	0
ENSG00000155380.13	ENST00000369626.8	0	0	0	0	0	0	0	0	0	17.0913	0
ENSG00000155380.13	ENST00000679803.1	9.25926	2.47786	3.55889	11.1011	17.5156	15.3951	13.8426	13.8713	13.2009	0	18.206
ENSG00000198799.12	ENST00000361127.6	0	0	0.071238	4e-06	4e-06	0.110059	3e-06	0.208335	5e-06	5e-06	5e-06
ENSG00000081026.19	ENST00000307546.14	0	0	0	0	0	0	0	0	0	0.203935	0
ENSG00000081026.19	ENST00000369615.5	0	0.122293	0.257615	0.177242	0.558471	0.596999	0	0	0.236429	0	0.36215
ENSG00000116793.16	ENST00000393357.6	0	0	0	0	0	0	0	0	0	2.36583	1.51365
ENSG00000116793.16	ENST00000369598.5	0	0	0	2.11668	0	1.22336	1.67694	0.417832	2.73479	0	0
ENSG00000116793.16	ENST00000357783.6	0	0.306418	0	0	0	0.647198	0	0	0.576702	0	0
ENSG00000081019.14	ENST00000612242.4	0.363204	0.120674	0.508407	0.524685	1.28584	2.56134	0	0	0	0.396512	0
ENSG00000081019.14	ENST00000615321.1	0	0	0	0	0	0	0	1.09863	0	0	0
ENSG00000134262.13	ENST00000256658.8	0	0	0	0	1.40212	0	2.77572	0.922303	1.02734	0.473703	0.909225
ENSG00000118655.7	ENST00000650450.2	0	0	0	0	0	2.13385	0.641046	0.983562	0.604129	0	0
ENSG00000163349.22	ENST00000626993.2	0	0	0	0	0	0	0	0	0	0	1.39491
ENSG00000163349.22	ENST00000340480.8	0	0	0	0	0	0	0	0	0	0.875031	0
ENSG00000163349.22	ENST00000361587.3	0.97436	0.832457	0.584604	1.80972	2.11194	4.28951	1.04523	1.25009	0.696341	0	0
ENSG00000116774.12	ENST00000320334.5	5.63626	1.53189	3.95427	9.62086	7.79603	20.7728	2.30816	2.30045	1.70857	0	1.51214
ENSG00000197323.12	ENST00000358465.7	0.477058	0.188532	0.893578	0.842146	1.14794	1.99409	1.15244	0.849352	1.57706	1.46274	1.1166
ENSG00000116752.6	ENST00000369541.4	9.88487	8.2064	7.85814	37.8436	28.3908	44.9355	19.1095	23.4133	29.2142	19.0496	34.5559
ENSG00000213281.5	ENST00000369535.5	1.13017	1.12647	1.38421	13.3347	15.7321	22.6805	11.6025	7.35257	6.95854	4.92422	4.17028
ENSG00000009307.17	ENST00000339438.10	0	1.89967	1.60833	7.81583	5.52852	2.53702	11.5107	11.1143	11.6343	13.5724	11.7008
ENSG00000009307.17	ENST00000689989.1	0	0.650504	1.32512	0	0	0	0	0	0.706962	0	0
ENSG00000009307.17	ENST00000689217.1	0	0	0.690758	2.41051	0	0	1.79272	1.80353	0	0	0
ENSG00000009307.17	ENST00000688211.1	0	0	0	0	0	0	1.8197	0	0	0	1.23372
ENSG00000009307.17	ENST00000438362.7	0	0	0	2.99956	2.43351	6.9761	2.28225	1.17784	0	0	0
ENSG00000009307.17	ENST00000358528.9	0	0	0	4.20483	3.5369	3.67795	2.42945	2.03572	2.14867	6.5449	1.74775
ENSG00000009307.17	ENST00000692719.1	0	0	1.23258	3.7869	0	0	1.73861	0	1.72539	0	0
ENSG00000009307.17	ENST00000610726.5	0	0.541773	0	0	0	0	0	0	0	0	0
ENSG00000009307.17	ENST00000689732.1	0	2.08604	0	0	1.70383	1.67013	0	0	0	0	0
ENSG00000009307.17	ENST00000693467.1	1.21185	0.778006	0	0	0	0	2.04913	0	2.63207	1.07568	1.36199
ENSG00000009307.17	ENST00000686235.1	0	0	1.49962	0	0	1.85571	1.81142	3.39842	4.77096	0	1.70172
ENSG00000009307.17	ENST00000684913.1	0	0	0	0	0.890363	4.39519	0	1.61797	1.95155	3.26396	0
ENSG00000009307.17	ENST00000686025.1	0	0	0	4.19857	2.82125	1.58182	3.2591	2.66764	5.90524	1.19198	3.12765
ENSG00000009307.17	ENST00000687759.1	0	0	0.611732	1.19332	6.30007	4.48059	0	0	0	0	0
ENSG00000009307.17	ENST00000692672.1	0	0	0	0	0	2.32676	0.626057	0	0	0	0
ENSG00000009307.17	ENST00000529046.6	2.09792	0	0	0	0	2.04031	0	0	0	0	0
ENSG00000009307.17	ENST00000689885.1	0	0	0.572548	0	0	1.82734	0	0	1.42401	0	0.740385
ENSG00000009307.17	ENST00000686667.1	0	0	0	0	3.37374	2.31648	0	0	0	0	0
ENSG00000009307.17	ENST00000261443.9	0	0	0	0	0	0	0	2.26053	0	0	0
ENSG00000009307.17	ENST00000369530.5	0	0	0	0	0	0	0	1.88805	0	0	0
ENSG00000052723.12	ENST00000060969.6	0.878477	1.07425	0.48844	3.08327	2.44361	2.61219	2.19986	2.57354	1.4821	1.64207	1.29657
ENSG00000134198.10	ENST00000369516.7	0	0	0.271724	0	0	0.839594	0	0	0	0	0
ENSG00000134259.6	ENST00000675637.2	0	0	2.33007	0	0	0	0	0	0	0	0
ENSG00000173218.15	ENST00000355485.7	0	0	1e-06	1e-06	1e-06	1e-06	1e-06	1e-06	1e-06	1e-06	1e-06
ENSG00000173218.15	ENST00000369510.8	0.36577	0	0.095999	0.528391	0.693711	0.44494	0.82399	0.137328	0.914912	0.176849	0.269908
ENSG00000173218.15	ENST00000369509.1	0	0	0	0	0	0	0	0	0	1.13494	0
ENSG00000163393.13	ENST00000369503.9	0	0	0	0.248958	0	0	0.517689	0.257957	0	0.530046	0.763027
ENSG00000173212.5	ENST00000684484.1	0	0	0.543084	0	3.37312	1.18945	0	0.321451	0	0	0
ENSG00000173212.5	ENST00000369500.4	0.137985	0	0	4.4296	0	0	1.08701	0	0.408951	1.29621	0.911296
ENSG00000173212.5	ENST00000683341.1	0	0	0	0	1.84634	0	0.395434	0	0	0	0
ENSG00000163399.16	ENST00000295598.10	0	0	0	6.58978	6.22857	6.84941	34.2717	20.0334	7.39792	19.7559	19.1768
ENSG00000163399.16	ENST00000537345.5	0	0	0	0	0	0	0	0	0	0	3.46121
ENSG00000163399.16	ENST00000369496.8	9.01387	9.40224	7.76365	69.1026	72.1861	88.3402	43.467	58.6264	39.6661	96.9747	81.3818
ENSG00000116815.16	ENST00000369489.10	3.66994	0.914496	0	2.6508	0	5.95239	8.26748	4.57093	0	8.46554	9.47843
ENSG00000116815.16	ENST00000369487.3	0	0	0	0	1.81206	0	0	6.8096	1.99156	0	0
ENSG00000143061.18	ENST00000369486.8	0	0	0	1.58797	1.33428	1.9612	0.165089	0	0	0	0.162231
ENSG00000116824.5	ENST00000369478.4	1.16708	0	0	0	0	0	0	0	0	0	0
ENSG00000134247.10	ENST00000393203.3	0.126618	0.131387	0.265855	0.791833	0.199999	1.02682	1.33308	0.19438	0.633424	0.778906	0.560601
ENSG00000116830.12	ENST00000369466.9	0	0	0.087726	0.241427	0	0.406596	0.627483	1.25077	0.696721	0.257011	0.616621
ENSG00000134253.10	ENST00000369464.7	0	0	0	0	0	0	0	0	0.394508	0	0
ENSG00000198162.12	ENST00000356554.7	1.5902	0.551557	0.871365	0.666121	1.54048	1.19663	0.831022	0.742644	0.922714	0.425463	1.22495
ENSG00000198162.12	ENST00000422329.1	0	0	0	0	0	0	0	2.99473	0	0	0
ENSG00000183508.5	ENST00000369448.4	0.284157	0	0.447478	0.205247	0.21557	0	0	0	0	0	0
ENSG00000196505.11	ENST00000369443.10	0.096521	0	0.188146	0	0.611211	0.290674	0	0.358923	0.5977	0.551339	0.449349
ENSG00000196505.11	ENST00000369442.3	0	0.349992	0	0.50725	0.801494	1.13904	1.0547	1.74715	0	0	0.830279
ENSG00000065183.16	ENST00000349139.6	0.315427	0.156932	0.247936	1.36969	1.19772	1.4045	0.47292	1.33163	1.57528	1.33178	1.8589
ENSG00000092607.15	ENST00000449873.5	0.948459	3.78575	3.31909	0	0	2.05111	0	0.946444	0	0.486185	0.933181
ENSG00000116874.12	ENST00000235521.5	0.907725	0.904768	0.317654	3.0597	2.75451	2.94453	4.08976	2.26841	2.5228	2.32652	1.78621
ENSG00000116882.15	ENST00000325945.4	17.0732	0	42.3821	0	0	1.01843	0	0	0	0	0
ENSG00000116882.15	ENST00000361035.8	2.56505	27.0121	6.83049	0	0	0	0	0	0	0	0
ENSG00000203857.10	ENST00000369413.8	0	0	0	0	1.64107	3.50856	0	0	0	0	0
ENSG00000203857.10	ENST00000528909.1	0	0	0	2.80377	0	0	0	0	0	0	0
ENSG00000143067.5	ENST00000421812.3	0.432234	0.143609	0.302516	0.624405	0.218604	1.63579	0.216381	1.07833	0.96103	0.886261	0.425272
ENSG00000092621.13	ENST00000641597.1	0	0	0	0	0	0	0	3.43022	0	0	1.75464
ENSG00000092621.13	ENST00000641115.1	0	0	1.04219	0	0	0	0	0	0	0	0
ENSG00000092621.13	ENST00000369409.9	0	0	0	0	0	0	0	0	0	3.23789	0
ENSG00000092621.13	ENST00000641023.2	9.82906	12.7826	14.8454	32.1513	37.2345	15.2779	34.149	33.7536	46.7464	89.3545	71.1119
ENSG00000092621.13	ENST00000641811.1	8.39338	0	0	0	0	0	0	0	0	0	0
ENSG00000134240.12	ENST00000369406.8	36.2393	43.5633	45.307	0	0	0	0	0	0	0	0
ENSG00000134240.12	ENST00000544913.2	199.655	261.102	289.924	2.64763	0.712827	2.22948	0	0	0	0	0
ENSG00000134193.15	ENST00000256585.10	0	0	0	0	1.19503	0	0	0	0	0	0
ENSG00000134250.21	ENST00000256646.7	1.47185	0.971544	0.865652	0.992626	1.14681	1.22598	0	0.205701	0.45833	0.325279	0.202818
ENSG00000265808.4	ENST00000578049.4	2.53027	2.7509	2.89742	6.378	7.15356	5.22238	3.97218	4.49817	4.64833	5.43619	2.3761
ENSG00000265808.4	ENST00000618538.1	0.38765	0	0	0	0	0	0	0.626043	0	0	0
ENSG00000286106.2	ENST00000624419.2	0	0	0	0	0	1.44494	0	0	0	0	0
ENSG00000198019.13	ENST00000369384.9	0	0	0.606712	0	0	0	0	0	0	0	0
ENSG00000171943.12	ENST00000367123.8	0.979862	0.894982	0	0	0	0	0	0	0	2.24482	0
ENSG00000273213.4	ENST00000609879.2	0	0.646754	0	0	0	0	0	0	0	0	0
ENSG00000266338.7	ENST00000488031.6	0.761508	0	0.994218	1.09295	0	0	0	0	0.631787	0	0
ENSG00000266338.7	ENST00000581897.7	0	1.50943	0	0	0.43081	0	0	0	0	1.33939	0
ENSG00000196369.12	ENST00000641863.3	0	0	0.121216	0.226802	0	1.87271	1.90745	2.59237	0.815676	0	2.21533
ENSG00000215784.6	ENST00000400889.3	0	0	0	0	0	4.51963	0	0	0	0	0
ENSG00000162825.17	ENST00000369373.9	8.1e-05	4.5e-05	7.5e-05	0.000173	9e-05	0.000107	0.000214	3.9e-05	8.9e-05	0.000201	0.140853
ENSG00000117262.19	ENST00000313835.14	2.51341	4.08231	0	0	2.94645	11.5867	6.34296	0	0	0	2.76048
ENSG00000174827.14	ENST00000451928.6	10.7469	0	9.74204	1.60839	1.96369	0	0	0	0	0	0
ENSG00000174827.14	ENST00000417171.6	0	8.00839	0	16.8934	24.3601	19.2043	3.81051	6.96257	9.1671	5.20239	1.87227
ENSG00000265491.5	ENST00000582693.5	0.323676	0.250427	0.635094	0.964747	1.44271	2.2427	0.648949	2.32946	1.297	0.664496	1.05538
ENSG00000186141.9	ENST00000334163.4	0.435337	0.21696	0.228516	4.10938	3.96312	5.6487	3.30013	1.62905	1.4519	3.01261	2.80343
ENSG00000186364.12	ENST00000334513.6	0	0	0	0.906339	1.53064	4.07039	0	0.940384	0	0	0
ENSG00000131788.16	ENST00000369298.5	0	0	0	0	0	0	2.75473	1.83233	2.03913	0.470121	0
ENSG00000131788.16	ENST00000393046.3	0	0	0	0	0	0	0	1.63507	0	0	0
ENSG00000198483.13	ENST00000544626.2	0	1.07656	0.566957	0	0	0	0	0	0	0	0
ENSG00000143127.13	ENST00000369304.8	0	0	0	0	0	0	0.472572	0	0	0	0
ENSG00000143127.13	ENST00000539363.2	0	0	0	0	0	0	0	0.256232	0	0.526501	0.505283
ENSG00000131779.11	ENST00000428634.1	3.67433	0	0	0	0	8.93927	0	0	0	0	0
ENSG00000131779.11	ENST00000369306.8	0	2.23321	2.94038	4.85496	5.09916	0	10.9359	12.5761	11.2085	3.44549	8.26659
ENSG00000265241.8	ENST00000691760.1	2.27172	0	0	0	0	0	0	0	0	0	0
ENSG00000265241.8	ENST00000583313.7	0	0.551512	1.77076	3.76531	5.08784	4.53064	1.95045	1.66848	0.91943	1.42302	0.81447
ENSG00000265241.8	ENST00000632555.1	0	0	2.89452	0	0	0	0	0	0	0	0
ENSG00000265241.8	ENST00000369307.4	12.3511	16.2915	10.2638	140.293	189.765	157.317	109.935	142.729	86.3377	78.1577	105.622
ENSG00000271601.4	ENST00000604000.4	1.43654	1.02463	1.72358	0.296461	0	1.99712	2.46566	1.22871	2.05335	1.58362	1.21149
ENSG00000121851.13	ENST00000369314.2	6.61301	5.6805	8.67821	8.40765	3.76262	8.04438	12.96	11.1357	9.6491	3.81359	3.6599
ENSG00000265972.6	ENST00000582401.6	11.0109	13.8336	5.76729	0.41768	0.899604	4.22057	10.425	11.1466	11.0931	24.8995	22.1022
ENSG00000168509.20	ENST00000475797.1	38.3403	27.3721	34.2331	0	0	0	0	0	0	0	0
ENSG00000168509.20	ENST00000336751.11	5.96372	0	0	0	0	0	0	0	0	0	0
ENSG00000168509.20	ENST00000357836.5	0	13.6181	6.75753	0	0	0	0	0	0	0	0
ENSG00000168509.20	ENST00000636675.1	0	0	0	3.22801	1.13012	0	0	0	0	0	0
ENSG00000271425.9	ENST00000583866.9	1.6e-05	2e-06	1.7e-05	2.8e-05	1.6e-05	2.3e-05	2.3e-05	4e-06	1.6e-05	2.1e-05	2e-05
ENSG00000271425.9	ENST00000617010.2	0	0	0	0	0	0	4e-06	0	0	0	0
ENSG00000264343.7	ENST00000579793.6	0	0	0	0	0.683377	0	0	0	0	0	0
ENSG00000264343.7	ENST00000362074.7	0	1.3338	0	0	0	0	0	0	0	0	4.85475
ENSG00000264343.7	ENST00000687833.1	3.37062	8.66517	0	0	0	0	0	0	5.78137	0	0
ENSG00000264343.7	ENST00000689750.1	0	0	0	0	4.53971	0	0	0	0	0	0
ENSG00000264343.7	ENST00000692119.1	1.3379	0	0	4.7429	3.51897	5.19982	0	0	0	0	0
ENSG00000268043.8	ENST00000617931.4	0	0	0	0	0	0	0.313957	0	0	0	0
ENSG00000268043.8	ENST00000611443.4	0	0	0	0	0	0	0	0	0.720775	0	0.675219
ENSG00000131791.8	ENST00000254101.4	2.71355	2.40419	1.58266	0.902576	2.52191	3.42657	2.94328	4.58945	7.30029	7.11892	4.41627
ENSG00000131781.13	ENST00000441068.6	63.9219	41.127	61.5989	0	2.41567	0.860773	1.2433	3.17749	3.73257	1.40928	5.59067
ENSG00000131781.13	ENST00000369272.7	0	0	2.23227	0	0	0	0	0	0	0.978909	0
ENSG00000131781.13	ENST00000254090.9	8.01901	15.9308	9.53413	0	0.559634	0	2.53414	2.20837	7.86202	7.34724	5.15572
ENSG00000131778.20	ENST00000652587.1	0	0.901371	0	0	0	0	0	0	0	0	0.720502
ENSG00000131778.20	ENST00000369258.8	0	1.36149	0	2.71354	2.44756	0	6.22605	2.78181	10.0667	5.42045	0
ENSG00000131778.20	ENST00000369259.4	0	0	2.55631	2.61029	0	4.29503	3.61956	0	0	0	0
ENSG00000116128.12	ENST00000684121.1	0	0	0.149574	0.617481	1.29702	0	0.213979	0.214866	0.237583	0.438237	0.210269
ENSG00000162836.12	ENST00000609196.5	0	0	0	0	0	0	0	0.707358	0	0	0
ENSG00000162836.12	ENST00000583509.7	0	0	0	0	0	0	0.51587	0	0	0	0.844928
ENSG00000188092.15	ENST00000314163.12	2.35649	0	0	7.09796	1.17657	0	0	0	0	0	0
ENSG00000263956.8	ENST00000614015.4	0	1.06436	1.02442	0	0	0.896737	0	0	0	0	0
ENSG00000263956.8	ENST00000682118.1	0.541841	0	0	1.00345	0	0	0	0	0	0.846886	0
ENSG00000236334.3	ENST00000419275.3	0	0	0	0	6.9174	0	0	2.27165	0	0	0
ENSG00000270629.7	ENST00000614999.4	2e-06	0	0.249096	0.147846	2e-06	0.546655	0.298897	1e-06	2e-06	0.657323	3e-06
ENSG00000270629.7	ENST00000619423.4	0.207362	0	4e-06	7e-06	3e-06	6e-06	6e-06	2e-06	4e-06	6e-06	6e-06
ENSG00000286019.1	ENST00000593495.3	0	0	1.77518	0	0	0	0	3.71525	0	4.01669	0
ENSG00000177144.8	ENST00000322209.5	0	0	0	12.1226	12.3431	0	8.18951	11.5452	9.46267	13.8894	8.1832
ENSG00000178104.20	ENST00000695794.1	0	0	1e-06	0	0	0	0	0	0	0	0
ENSG00000178104.20	ENST00000695769.1	0	0	0	0	0.391385	0	0	0	0	0	0
ENSG00000178104.20	ENST00000369354.7	0	0	0.102773	0	0	0	0	0	0	0	0
ENSG00000178104.20	ENST00000369347.8	0	0	1.81578	0	0	0	0	0	0	0	0
ENSG00000178104.20	ENST00000369351.7	0	0	0	0	0	0	0.360399	0	0	0	0
ENSG00000178104.20	ENST00000479408.6	0	3.06185	2.25628	2.85581	5.88458	3.9615	1.63493	1.84134	1.47636	0	0.9123
ENSG00000178104.20	ENST00000313431.13	0	0.183293	0	0.758229	0	0	0	0	0.264567	0	0.41767
ENSG00000178104.20	ENST00000529945.2	0.626886	0.331351	0.939271	0.629097	0	1.02521	0	0	1e-06	0	1e-06
ENSG00000269713.8	ENST00000615421.4	0.175746	0	0	0	0	0	0	0	0.569298	0	1.02776
ENSG00000269713.8	ENST00000621074.5	2.11436	2.30115	1.74853	5.29582	3.22938	3.57344	0	1.58439	0	0	0
ENSG00000269713.8	ENST00000613595.4	0	0	0	0	0	0	1.43483	0	0	0	0
ENSG00000269713.8	ENST00000584027.9	0	0	0	0	0	0	0	1.34293	0	1.59527	0
ENSG00000269713.8	ENST00000621645.4	0	0.470392	0	0	0.514635	0.529746	0.680924	0	0	0	0
ENSG00000286219.2	ENST00000650865.2	0	0.104775	0.200465	0.13613	0.284488	0.31686	0	0.301402	0	0	0.138895
ENSG00000286219.2	ENST00000578189.1	0.174965	0	0	0	0	0	0	0	0	0	0
ENSG00000286185.1	ENST00000621744.4	2.4e-05	3e-06	1.7e-05	4e-06	1.7e-05	1.3e-05	5.1e-05	0	3e-06	1.9e-05	5e-06
ENSG00000271383.8	ENST00000651566.2	1.3e-05	4e-06	1.4e-05	6e-06	1.2e-05	1.1e-05	0.148169	0	0	1.5e-05	4e-06
ENSG00000288825.1	ENST00000369159.3	13.5224	26.9519	87.8398	0	262.928	267.093	11.6918	9.17535	54.1087	49.899	101.98
ENSG00000288859.1	ENST00000607355.3	0	0	0	263.817	0	0	0	0	0	0	0
ENSG00000184678.11	ENST00000369155.4	0.388828	0.775122	0	2.2468	0.590474	3.78391	1.16791	0	1.29678	1.79418	2.86924
ENSG00000184260.6	ENST00000331380.4	0	0	6.7685	9.05599	4.96296	10.1677	14.6915	22.2057	15.6805	0	0
ENSG00000178096.9	ENST00000369152.6	0	5.96132	0	0	12.7042	0	5.38931	0	3.98932	0	0
ENSG00000178096.9	ENST00000369150.1	0	0	0	0	0	0	0	0	0	0	2.01663
ENSG00000159164.10	ENST00000369146.8	0	0	0	0	1.12875	0.603312	0	0	0.310141	0	0
ENSG00000159164.10	ENST00000369145.1	0	0	0	0	0	0.469306	0	0	0	0.444967	0
ENSG00000143368.10	ENST00000271628.9	2.37207	1.18214	2.49021	55.1311	47.6861	32.8269	25.076	27.5448	25.7103	16.4178	21.8793
ENSG00000014914.21	ENST00000369140.7	0	0	0	0	0	0.600259	0.555813	0	0	0	0
ENSG00000264522.6	ENST00000581312.6	0.26563	0.441274	0.278868	1.30606	1.07475	1.72333	0.265955	0.530422	0.306083	0.272326	0.130676
ENSG00000136631.15	ENST00000643970.1	0	0	0	0	0	0	0	0	0	0	3.29143
ENSG00000136631.15	ENST00000611412.4	0.423105	0	0	0	0	4.80373	0	0	0	0	0
ENSG00000136631.15	ENST00000644510.2	0	1.4727	1.93893	5.33602	6.72679	0	1.2536	0	3.69574	2.27214	0
ENSG00000136631.15	ENST00000643611.1	0	0	0	0	0	0	6.43599	0	0	0	0
ENSG00000136631.15	ENST00000644526.1	0	0	0	0	0	0	0	3.2826	0	0	0
ENSG00000023902.14	ENST00000369126.5	1.96907	0.490662	0	5.68928	0	0	0	0	4.1044	0	0.726506
ENSG00000023902.14	ENST00000369124.5	0	0	0.864564	2.83991	4.99799	16.0284	4.94719	4.31431	0	4.43249	0
ENSG00000143401.15	ENST00000583931.6	0	0	0	5.91823	0	0	0	4.7422	5.67702	0	2.15414
ENSG00000143401.15	ENST00000629042.2	4.38195	0	4.59868	6.84021	16.704	12.4332	7.81378	0	0	0	0
ENSG00000143401.15	ENST00000616917.4	0	0.838066	0	0	0	0	0	0	0	3.01701	0
ENSG00000118298.12	ENST00000647854.1	1.19803	1.19412	1.31513	0	0	0	0	0	2.99666	0.921172	0
ENSG00000117362.13	ENST00000414276.6	0	0	2.26446	0	0	0	0	0	0	0	0
ENSG00000117362.13	ENST00000369109.8	0	0	0	6.85708	0	27.4845	0	0	0	0	0
ENSG00000117362.13	ENST00000360244.8	14.6046	14.5428	10.3811	13.6275	17.721	9.66106	21.9732	22.8043	42.6046	21.8901	12.3906
ENSG00000118292.9	ENST00000369102.5	0	0	0	0	0	2.4861	1.15101	0	0	0	0
ENSG00000118292.9	ENST00000369098.3	0	0	4.77045	0	0	0	0	0	0	0	0
ENSG00000118292.9	ENST00000369099.8	5.90719	2.94397	0	0	0	0	0	0	0	0	0
ENSG00000159208.16	ENST00000369094.5	0.825737	0	0	0	0	0	0	0	0	0	0
ENSG00000266472.6	ENST00000614145.5	22.8978	17.6477	16.9951	34.5594	48.6711	32.3196	10.5535	30.603	42.2156	0	14.888
ENSG00000266472.6	ENST00000581066.2	1.43423	3.57841	1.52893	11.2476	2.05871	12.7393	31.1164	37.4078	22.2293	33.1014	22.2863
ENSG00000117360.13	ENST00000324862.7	0	0	0	6.66128	5.38204	2.57854	4.26166	3.71649	2.95744	2.72735	4.71138
ENSG00000163125.16	ENST00000401000.8	0.313187	0.208111	0.109598	0.754063	0.791977	1.5239	0.31357	0.938171	0.696342	0.642165	0.462214
ENSG00000143374.18	ENST00000369064.8	0	0	0	0	1.60585	0	3.72337	2.78319	3.10066	0	1.48026
ENSG00000143374.18	ENST00000606933.5	0	2.00074	1.56549	0	0	0	0	0	0	0	0
ENSG00000143369.15	ENST00000369049.8	0	0	0	0	0	0.743161	0	0.685833	0	0	0.676222
ENSG00000143369.15	ENST00000369047.9	13.2162	6.38926	9.87069	0	0	0	0	0	0	0	0
ENSG00000143382.16	ENST00000369041.9	0	0	0	0	0	0	0	0	0	0.44413	0
ENSG00000143382.16	ENST00000674043.1	0	0	0	0	0	0	1.26148	0	0	0	1.23965
ENSG00000143382.16	ENST00000674058.1	0	0	0	0	0	0	0	0.686509	0	0	0
ENSG00000143382.16	ENST00000369038.6	0	0	0.617316	0.912574	1.78432	1.27161	0	0	0.980531	0	0
ENSG00000143384.14	ENST00000678610.1	0	0	0	0	0	0	0	2.88568	0	0	0
ENSG00000143384.14	ENST00000620947.4	8.59405	0	6.48384	11.5298	0	10.8541	0	0	0	0	0
ENSG00000143384.14	ENST00000369026.3	0	3.97591	0	6.26528	14.553	7.25969	15.5813	14.0174	17.9948	17.8698	12.8412
ENSG00000143420.19	ENST00000369014.10	15.1037	25.9442	19.7988	56.127	48.0202	43.3009	42.6123	34.4393	60.7523	32.3544	18.5415
ENSG00000143420.19	ENST00000271690.12	2.39139	1.48975	0	5.61373	4.18791	9.21184	6.28899	0	0	0	0
ENSG00000143420.19	ENST00000356527.9	0	0	0.701964	0	0	0	0	6.005	5.6206	8.46862	11.2126
ENSG00000143420.19	ENST00000362052.7	0	0	1.77578	20.0036	22.6964	13.7174	5.08067	0	11.2826	2.6012	0
ENSG00000143457.11	ENST00000271732.8	1.06843	0	0.841258	0.772643	2.83846	4.76554	1.61806	1.59924	0.890833	0	1.57683
ENSG00000163131.12	ENST00000679898.1	2.93281	0	0	0	0	0	0	0	0	0	0
ENSG00000163131.12	ENST00000680664.1	0	0	1.24786	0	0	1.23488	0	0	0	0	0
ENSG00000163131.12	ENST00000679512.1	0	0	0	0	0.975299	0	0	0	0	0	0
ENSG00000163131.12	ENST00000368985.8	0	0.310652	0	0	0	0	0	0	0	0	0
ENSG00000163131.12	ENST00000680311.1	0	0	0	0.898266	0	0	0	0	0	0	0
ENSG00000163131.12	ENST00000679582.1	0	0	0	0	0	1.00528	0	0	0	0	0
ENSG00000143387.14	ENST00000679260.1	0.661443	0	0	0	1.00358	0	0	0	0	0	0
ENSG00000143437.21	ENST00000358595.10	1.72165	2.57375	0	1.54081	2.35069	2.79206	0	0	1.72236	1.32363	0
ENSG00000143437.21	ENST00000354396.6	0	0	0	0	0	0	0	0	0	0	0.689175
ENSG00000143437.21	ENST00000515192.5	0	0	0	0	0	0	1.30909	0	0	0	0
ENSG00000143437.21	ENST00000505755.5	0	0	0	0	0	0	0	2.11103	0	0	0
ENSG00000143379.13	ENST00000692314.1	0.759423	0	0.79704	0	0	0	0	0.852291	0	0	1.12046
ENSG00000143379.13	ENST00000368962.6	0	0	0	0	0	0	0	0	1.04196	2.45541	0
ENSG00000143379.13	ENST00000692827.1	0	0	0	0	0	0	0	0	0	1.26072	0
ENSG00000143379.13	ENST00000368969.8	0	0	0	0	1.13095	0.906725	0	0	0	0	0
ENSG00000143418.20	ENST00000560793.6	51.8127	7.89926	27.5178	17.9695	46.633	31.7062	0	0	0	0	0
ENSG00000143418.20	ENST00000368954.10	0	3.01503	0	0	5.00592	0	37.2815	4.55206	0	0	21.2427
ENSG00000143412.10	ENST00000368947.9	3.53887	4.70312	3.0961	8.52042	6.26429	2.8699	2.6574	3.53136	4.91772	0.907022	5.22281
ENSG00000143409.17	ENST00000312210.9	0	0	0	1.54722	0	0.579051	0	0	0	0	0
ENSG00000143409.17	ENST00000683666.2	0	0	0	0	0	0	1.00594	0	2.23388	0	0
ENSG00000143409.17	ENST00000361738.12	2.32943	0	0.407586	0	0	0	0	0	0	1.19408	0
ENSG00000143363.17	ENST00000368936.5	0	0	0.635058	0	0	0	0	0	4.03489	1.39536	1.7855
ENSG00000143363.17	ENST00000368934.1	2.73565	0.389533	0	2.25824	3.55773	3.80317	1.17386	0.584965	0	0	0
ENSG00000163141.20	ENST00000368931.8	0	0.3831	0	0.555235	0	0.623392	0	0	0	0	0
ENSG00000143443.10	ENST00000368926.6	1.2548	0	4.23001	0	2.86577	7.41169	4.02108	3.13033	3.13314	1.42881	0.617292
ENSG00000197622.13	ENST00000357235.6	0.27854	0.555265	0.692122	4.82855	2.74037	3.19616	0.836683	0.833846	1.16488	4.18862	0.822161
ENSG00000213190.4	ENST00000368921.5	0	0.342629	0	17.4083	21.6538	22.3153	0	0	0	0	0
ENSG00000143458.12	ENST00000368918.8	0.089741	0	0.282615	0	0	0	0	0	0	0	0
ENSG00000143458.12	ENST00000368916.1	0	0.534893	0	0	0	0	0	0	0	0	0
ENSG00000143434.17	ENST00000368912.7	0	0	0.233818	0	0	0.361235	0	0	0.742792	0	1.64349
ENSG00000163154.6	ENST00000368910.4	0.844813	0	0	0	0	0	0	0	0	0	0
ENSG00000163156.12	ENST00000602841.5	0	7.65433	6.44965	60.0129	29.6617	52.3126	25.3729	17.1695	32.6403	25.9807	9.07045
ENSG00000163156.12	ENST00000368902.1	0	0	0	16.0168	0	0	0	0	0	0	0
ENSG00000163156.12	ENST00000368905.9	0	0	0	0	0	0	0	0	0.966267	0	0
ENSG00000163155.12	ENST00000368908.10	0.347011	1.38352	0.364305	0	0.526506	0	1.04231	0.519411	1.15732	0	0.512132
ENSG00000163159.15	ENST00000354473.4	1.39879	1.39423	2.20275	28.2897	23.3467	23.8518	13.6709	16.7965	19.8267	18.0771	7.41233
ENSG00000143398.20	ENST00000368890.8	0.913122	0.227537	0.958628	4.82405	7.2767	7.42063	4.79976	2.05016	5.71005	5.61685	5.06101
ENSG00000159352.16	ENST00000368884.8	7.5003	20.0318	13.2073	137.073	137.776	120.818	94.3767	68.0588	64.9575	54.0286	46.6526
ENSG00000159352.16	ENST00000445776.1	22.0262	0	22.1479	0	0	0	0	0	0	0	0
ENSG00000159352.16	ENST00000453615.1	17.9284	0	0	0	0	63.3906	0	0	0	0	0
ENSG00000143373.18	ENST00000336715.11	0	0	0	0	0	0	0	0	0	2.33799	0
ENSG00000143373.18	ENST00000426871.1	0.507223	0.252785	0.798751	1.46547	1.92397	0.82268	0	0	0	0	0
ENSG00000143393.17	ENST00000368873.6	0.897121	0.894198	0.634074	3.5083	0	2.15662	0	2.35868	1.87	2.41431	2.33065
ENSG00000143393.17	ENST00000529142.5	0	0	1.81758	2.4606	3.95975	5.85806	0	0	0	0	0
ENSG00000143393.17	ENST00000368872.5	0	0	0	0	0	0	1.87105	0	0	0	0
ENSG00000143390.18	ENST00000452671.7	0.486665	0.691448	0.72828	3.00639	2.45592	1.87525	2.08453	3.46134	3.08479	3.20039	2.0476
ENSG00000143416.21	ENST00000368868.10	18.1344	23.2066	15.2382	0	0	0	0	4.6821	0	8.01726	4.61649
ENSG00000143416.21	ENST00000447402.7	0	0	0	2.08476	0	0	0	0	0	0	0
ENSG00000143416.21	ENST00000426705.6	0	9.30842	9.54285	0	8.24881	0	0	0	0	0	0
ENSG00000159377.11	ENST00000290541.7	75.1602	80.775	63.9336	609.301	470.605	587.178	242.741	228.006	209.815	152.384	148.328
ENSG00000143442.22	ENST00000368863.6	0.793732	0.131858	0.277763	0.95564	0	2.14563	0	0.594034	0.882393	1.01718	0.390473
ENSG00000143442.22	ENST00000491586.5	0	0	0	0	0	0	0.297169	0	0	0	0
ENSG00000143442.22	ENST00000450842.1	0	0	0	0	0	0	0	4.7894	0	0	0
ENSG00000143375.15	ENST00000271636.12	0	0.312163	0	0	0.445079	0.465377	0	0	0	0	0
ENSG00000143367.17	ENST00000392712.7	0	0.567618	0.597854	3.29065	3.45616	6.92735	0.855256	0.426198	1.42444	1.31362	1.6809
ENSG00000143376.14	ENST00000458013.7	0.372062	0.123616	0.260402	1.07496	0.376343	1.40807	0.186258	0	0.206811	0	0
ENSG00000143436.11	ENST00000368830.8	0.989933	10.2058	6.21693	58.3068	57.5918	58.7638	36.9848	33.4515	66.6959	29.0694	33.433
ENSG00000143450.19	ENST00000635322.1	0	0	0	8.94644	0	0	0	0	0	0	0
ENSG00000143450.19	ENST00000321531.10	0	0	0	0	3.87095	6.207	0	0	0	0	0
ENSG00000143450.19	ENST00000479764.7	0	0	0	0	0	0	0	0	0	0.3336	0
ENSG00000143450.19	ENST00000582415.2	0	0	3.47503	0	0	0	0	0	5.51971	0	0
ENSG00000182134.17	ENST00000368825.7	0	0.318665	0	0.461848	1.94031	2.59271	0.480147	0	0	0.49165	0
ENSG00000182134.17	ENST00000368823.5	0	0	0	0	0	0	0	0	1.53546	0	0
ENSG00000143365.19	ENST00000318247.7	0.699861	2.78643	6.99637	0	0	0	2.51907	0	2.33086	1.28971	0.412577
ENSG00000159445.13	ENST00000368814.8	0.168814	0	0.17725	1.86555	1.06809	0.799671	1.26765	0	1.68904	0.51921	0.498285
ENSG00000159445.13	ENST00000489410.1	0	3.88545	4.09242	9.9398	0	3.16126	8.78157	5.07684	0	0	0
ENSG00000197747.9	ENST00000368811.8	0	0	0	467.156	369.601	268.194	118.897	56.1555	66.861	7.43639	0
ENSG00000197747.9	ENST00000368809.1	52.3551	83.3927	94.387	1485.23	1917.48	2762.3	237.21	273.35	109.165	96.7671	55.5866
ENSG00000163191.6	ENST00000271638.3	0	14.6261	0	652.604	538.825	943.619	239.228	141.515	0	0	68.5784
ENSG00000163220.11	ENST00000368738.4	36.1445	14.1747	24.8897	44.5704	47.2311	42.2868	3.55961	7.09541	0	0	0
ENSG00000163221.9	ENST00000368737.5	0	6.48672	3.41613	0	0	0	0	0	0	0	0
ENSG00000143546.10	ENST00000368733.4	43.468	24.0702	35.4933	0	0	0	0	0	0	0	0
ENSG00000197956.10	ENST00000368719.9	165.712	44.8782	82.7995	1127.42	1171.57	4051.14	652.698	600.719	221.351	239.15	230.229
ENSG00000197956.10	ENST00000496817.5	0	0	0	0	20.936	28.7895	37.4327	37.4139	42.21	48.8423	27.6899
ENSG00000197956.10	ENST00000368720.6	0	0	0	8.9948	0	5.42165	0	0	0	0	0
ENSG00000196154.12	ENST00000368716.9	37.815	29.1478	15.2691	8.40423	30.8943	6.99986	39.3175	26.124	14.552	4.47327	22.643
ENSG00000188015.10	ENST00000368713.8	0	0	0	0	0	6.35738	7.70016	4.66311	0	0	2.29888
ENSG00000196754.13	ENST00000368708.9	0	0	0	0	0	0	0	3.15785	0	0	0
ENSG00000196754.13	ENST00000368710.6	0	0	0	0	0	0	5.6535	0	0	5.78894	0
ENSG00000188643.11	ENST00000368704.5	25.832	41.8533	30.9414	17.3144	0	22.217	13.7397	29.672	37.604	36.9267	0
ENSG00000188643.11	ENST00000368706.9	0	0	0	0	13.0813	0	41.3221	38.1288	15.7048	0	25.5199
ENSG00000189334.9	ENST00000476873.5	0	4.93192	2.07785	1.42959	0	1.60508	8.91737	10.3688	0	4.5655	0
ENSG00000189171.15	ENST00000440685.7	0	0	0	3.71916	0	4.11276	13.5335	8.85301	0	0	0
ENSG00000189171.15	ENST00000476133.6	54.1512	17.6084	14.144	208.248	229.568	329.883	193.565	123.7	168.496	155.679	138.182
ENSG00000189171.15	ENST00000392623.5	0	0	0	0	0	0	0	0	0	0	7.69997
ENSG00000160678.12	ENST00000368696.3	0	0	0	0	0	0	4.55881	0	5.25927	0	4.41495
ENSG00000160678.12	ENST00000292169.6	0	0	2.60066	0	0	12.0536	445.474	313.334	391.933	187.072	162.213
ENSG00000160679.13	ENST00000368694.8	6.29455	0	3.08385	16.3746	29.2292	14.4411	16.4222	19.4717	15.3949	9.72839	13.6954
ENSG00000160679.13	ENST00000403433.5	0	2.74349	0	0	0	0	0	0	0	0	0
ENSG00000160679.13	ENST00000368687.1	0	0	0	0	0	20.1211	0	0	0	0	0
ENSG00000143553.11	ENST00000368685.6	0	9.13647	0	39.9281	10.3403	0	0	18.2937	0	0	0
ENSG00000143621.17	ENST00000361891.9	2.70473	3.82005	3.96732	147.94	144.237	66.2602	84.6612	80.7825	117.134	62.6256	47.1019
ENSG00000143624.14	ENST00000318967.7	0	0	0	0.430805	0	0	0.691573	0.68926	0	0.708141	0.348923
ENSG00000143554.14	ENST00000624995.4	0	0.900681	2.44925	0	0	3.03938	0	0	0	0	0
ENSG00000143554.14	ENST00000458027.5	0	1.80082	0	1.00123	0	0	0	0	0	0	0
ENSG00000143614.10	ENST00000368655.5	0.425096	0	0.22314	0.307046	0.483735	0.689476	0	0.159113	0	0.16343	0.156843
ENSG00000198837.10	ENST00000361217.9	0	0	0	0.298373	0.691057	0	0	2.75395	1.37733	0.246369	0.970489
ENSG00000160741.17	ENST00000368630.7	1.6622	0	0	6.06292	3.46327	11.6825	0	0	0	0	0
ENSG00000160741.17	ENST00000368633.2	0	0	0	0	0	0	0	0	0	2.51343	0
ENSG00000143570.19	ENST00000621013.4	0	0	6.22253	0	0	0	10.5448	10.1083	0	14.8029	0
ENSG00000143570.19	ENST00000537590.5	0	0	0	0	0	19.7201	0	0	0	0	0
ENSG00000143570.19	ENST00000617697.4	0	7.79067	0	9.62585	9.08864	0	0	0	13.7014	0	8.95304
ENSG00000143570.19	ENST00000368623.7	0	0	0	0	0	0	0	0	0	0	2.09561
ENSG00000143570.19	ENST00000356205.9	5.6748	0	0	24.8605	25.691	36.8501	17.0988	20.4872	24.3926	16.2559	6.90697
ENSG00000143578.16	ENST00000368603.5	0	0	0	0	0	0	0	0	0	5.41717	0
ENSG00000143578.16	ENST00000368600.7	1.84748	2.45528	1.29303	1.77924	1.86874	2.99648	2.77461	3.68711	1.02692	0	0
ENSG00000143543.15	ENST00000271843.9	41.543	50.118	29.5668	43.1208	65.9552	51.3013	41.5379	9.67439	0	40.4071	19.8472
ENSG00000143543.15	ENST00000368589.5	0	0	26.2671	110.68	75.8966	107.526	42.2663	72.9458	109.589	35.213	54.1743
ENSG00000143545.10	ENST00000368575.5	10.0713	16.7338	4.40591	23.6864	19.1009	14.6831	10.0836	11.5956	8.39851	9.03634	7.34505
ENSG00000177954.14	ENST00000651669.1	4078.13	3440.15	3652.62	16040.4	15895.2	16866.8	11094.7	11079.5	11771.4	16196.4	18121.4
ENSG00000143549.21	ENST00000611659.4	0	0	0	0	6.13731	0	0	0	0	0	0
ENSG00000143549.21	ENST00000368533.8	0	0	0	7.73154	0	8.25502	0	4.25472	0	1.90684	0
ENSG00000143549.21	ENST00000330188.13	4.96366	11.5591	8.67355	99.9839	102.526	147.216	63.9434	61.3949	54.9953	35.3518	34.7741
ENSG00000143549.21	ENST00000368531.6	0	0	0	0	0	2.87653	0	1.34282	0	0	0
ENSG00000143549.21	ENST00000368530.7	0	0	0	1.28696	0	0	0	0	0	0	0
ENSG00000143612.21	ENST00000368521.10	0	9.96786	0	0	0	0	0	0	0	0	32.454
ENSG00000143612.21	ENST00000362076.8	33.5	34.3013	32.2737	69.8463	105.02	107.964	68.778	63.0561	0	64.3844	27.4034
ENSG00000143612.21	ENST00000350592.7	0	0	0	31.2632	0	0	0	0	88.455	12.6162	0
ENSG00000143612.21	ENST00000368518.5	0	0.77721	0	11.859	10.7905	18.328	8.96648	0	4.98415	2.29532	1.14282
ENSG00000143612.21	ENST00000368516.1	0	0	0	0	0	0	0	3.69007	0	0	0
ENSG00000143569.19	ENST00000343815.10	0.728591	0.377373	0.254967	9.90863	13.4021	12.6051	5.50643	9.55313	6.94794	4.285	1.31763
ENSG00000143569.19	ENST00000271877.11	0	0	0	0	0	0	1.36541	0	5.22725	1.11129	1.14606
ENSG00000143569.19	ENST00000428931.6	0	0	0	0	1.92231	0	2.61319	0	0	0	0
ENSG00000143569.19	ENST00000361546.6	1.06217	0.30513	1.56112	3.43271	0	1.79764	0	0.887218	3.73611	0	1.42141
ENSG00000143569.19	ENST00000433615.5	0	0	0	4.73435	7.12184	6.29451	0	3.92657	0	0	0
ENSG00000143575.15	ENST00000328703.12	4.37001	27.3875	11.4237	92.8421	89.348	100.582	44.255	36.0876	59.2711	38.6378	41.485
ENSG00000143595.13	ENST00000324978.8	0	0	0	0	0.74451	1.59174	0	0	0	0	0
ENSG00000143515.20	ENST00000368487.7	0	0	0	0.870768	0	0	0	0	0	0	0
ENSG00000143515.20	ENST00000672630.1	0.136936	0.409469	0	2.17599	0.831068	3.9978	0	0.242896	1.82678	2.73785	1.81886
ENSG00000143515.20	ENST00000696573.1	0	0	0	0	0	0	0.537424	0	0	0	0
ENSG00000160712.13	ENST00000368485.8	2.65162	1.24914	1.16947	0.202294	0.633812	2.03261	2.09123	2.08424	1.16099	3.21258	2.05511
ENSG00000169291.10	ENST00000304760.3	0	0	0.384335	0	0.185151	0.197924	0	0	0	0	0
ENSG00000160714.10	ENST00000292211.5	1.54103	2.04798	2.42702	16.7004	19.6827	20.3863	11.186	10.9384	11.5637	13.4319	13.1546
ENSG00000160710.18	ENST00000679899.1	0.859547	0	0	1.62437	1.25763	0	0	0	0	0	0.666487
ENSG00000160710.18	ENST00000680270.1	0	0.547921	0	0	0.826303	1.47676	1.73844	1.28937	0	0	0
ENSG00000160710.18	ENST00000681056.1	0	0.510605	0.501175	0	0.894181	0.939457	0.69194	0	1.14866	0.556635	0.524844
ENSG00000160710.18	ENST00000368474.9	0.758831	0.653999	0.567023	0	1.79255	1.97787	0	0	1.91421	0	0.742637
ENSG00000160710.18	ENST00000680305.1	0	0.711625	0	0	0	1.77501	0	0	0	0	0
ENSG00000160710.18	ENST00000648231.2	0	0.368921	0	0	0	0	0	0	0	1.40572	0
ENSG00000160710.18	ENST00000368471.8	1.02645	0	0.50929	0	0	1.73486	0.689965	1.05806	0	1.01116	1.93257
ENSG00000160710.18	ENST00000649022.2	0	0.342164	0.749878	1.65053	0	0	0.895965	1.36557	1.19618	0	0
ENSG00000160710.18	ENST00000649042.1	0	0	0	0	0	0	0	0	0.844889	0	0
ENSG00000143603.19	ENST00000271915.9	0	0	0	5e-06	0	0	0	0	0	0	0
ENSG00000143603.19	ENST00000618040.4	0	0	0	5e-06	0	0	0	0	0	0	0
ENSG00000143603.19	ENST00000358505.2	0	0	0	0.787254	0	0	0	0	0	0	0
ENSG00000163344.6	ENST00000368467.4	39.8394	32.5443	24.7777	26.5185	34.0418	38.0443	13.8019	22.9131	22.1082	13.7172	10.5377
ENSG00000163346.17	ENST00000368465.5	2.91789	3.17278	0.835447	4.26129	7.42993	9.03499	0	0	3.98115	4.59061	2.34891
ENSG00000163346.17	ENST00000368463.8	0	0	0	0	0	0	3.12529	3.10874	0	0	0
ENSG00000163348.4	ENST00000368457.3	1.31002	0.522302	1.65037	5.67844	4.00115	12.1238	3.27284	3.52955	6.29839	3.78637	3.09341
ENSG00000160691.19	ENST00000368445.9	0	0	0	0	0	0	8.76078	14.8253	0	5.48187	2.14662
ENSG00000160691.19	ENST00000368449.8	4.08818	0	2.75888	0	12.6812	16.722	0	0	0	0	0
ENSG00000160691.19	ENST00000448116.7	0	0	0	0	0	0	0	0	2.58047	0	0
ENSG00000160691.19	ENST00000368450.5	0	1.9922	0	15.5247	0	0	7.68531	0	0	7.93349	5.25279
ENSG00000160691.19	ENST00000368453.8	0	0	0	0	0	0	0	0	15.5996	0	0
ENSG00000173207.13	ENST00000368439.5	0	0	0	38.9251	40.0617	15.2233	13.9686	50.5238	35.6077	0	0
ENSG00000173207.13	ENST00000308987.6	8.69361	24.5516	0	542.901	529.433	454.69	150.801	103.619	189.92	42.2862	45.4233
ENSG00000160688.19	ENST00000292180.8	0	0	0	3.49051	0	0	1.35407	1.46904	2.03442	0	0
ENSG00000160688.19	ENST00000368433.5	0	0	0	0.716313	0	0.568225	0	0	0	0	0
ENSG00000160688.19	ENST00000315144.14	4.1482	4.13468	3.81056	19.7414	17.7862	13.611	0	10.3911	10.3051	8.94235	6.12207
ENSG00000160688.19	ENST00000368432.5	0	0	0	0	0	0	12.8581	0	0	0	0
ENSG00000160688.19	ENST00000368431.7	0	0	0	2.43938	5.01493	1.84005	0	0.837571	0	0	0
ENSG00000160688.19	ENST00000368428.1	0	0	0	0	6.35823	0	0	0	0	0	0
ENSG00000160685.14	ENST00000417934.6	0	0	0	0	0	0	0	0	3.39855	0	0
ENSG00000160685.14	ENST00000368426.3	1.61353	0.686487	0.964073	0	0	1.11707	2.41351	3.43634	0	6.35485	5.4211
ENSG00000160685.14	ENST00000535420.6	0	0	0	1.99453	0	0	0	0	0	0	0
ENSG00000160685.14	ENST00000292176.2	0	0	0	0	0.619765	0	0	0	0	0	0
ENSG00000143537.14	ENST00000355956.6	0	0	0	0	0	0	0	0	4.12447	0	0
ENSG00000143537.14	ENST00000359280.8	0.928447	0	0	0	0	0	0	0	0	7.05512	2.43175
ENSG00000143537.14	ENST00000271836.10	0	0	0	1.09519	4.34932	0	2.95294	9.2896	0	0	3.27459
ENSG00000143537.14	ENST00000368413.5	0	0	0	0	0	2.38255	0	0	0	0	0
ENSG00000143537.14	ENST00000356955.7	0	1.54522	0.644673	2.12983	0	0	2.39409	2.31011	0	0	0
ENSG00000143537.14	ENST00000447332.3	0	0	0	0.584796	0	0	0	0	0	0.654389	0
ENSG00000243364.8	ENST00000368409.8	0	0.761625	0	11.0384	13.9123	0	4.63399	0	10.1936	5.87534	7.89397
ENSG00000243364.8	ENST00000427683.2	2.869	0	0	0	0	6.20442	0	2.93497	0	0	0
ENSG00000143590.14	ENST00000368408.4	0	0	0	1.415	0	0.794348	0.741177	1.46614	1.63338	1.50631	0.722799
ENSG00000169242.12	ENST00000368406.2	35.9595	6.4053	24.3727	10.2211	17.5505	0	31.4654	35.6063	71.883	116.995	128.341
ENSG00000169242.12	ENST00000368407.8	0	0	0	0	0	18.1621	0	0	0	0	0
ENSG00000169241.19	ENST00000368401.6	0	0	0	0	0	33.42	0	0	15.0358	0	0
ENSG00000169241.19	ENST00000622581.4	0	6.14806	0	0	30.4158	0	0	0	0	0	3.34792
ENSG00000169241.19	ENST00000303343.12	0	0	0	0	0	0	0	9.06103	0	0	0
ENSG00000169241.19	ENST00000368404.9	0	0	0	30.9459	0	0	12.1771	0	0	0	0
ENSG00000179085.8	ENST00000368400.5	130.601	161.418	252.282	120.747	195.331	228.772	219.679	117.291	197.499	96.4035	146.487
ENSG00000163463.13	ENST00000497317.5	48.8423	102.915	179.121	595.672	483.904	406.893	145.28	200.576	155.936	193.355	144.56
ENSG00000163463.13	ENST00000295682.6	31.355	46.7724	10.05	47.5189	85.7196	117.995	0	0	0	0	0
ENSG00000163463.13	ENST00000491084.5	7.68714	0	0	18.6466	0	0	43.1888	22.1548	11.4215	13.6676	15.3007
ENSG00000163462.19	ENST00000545012.5	0	0	0	0	0	0	0	0.421046	0	0	0
ENSG00000163462.19	ENST00000543729.5	0	0	0	0	0	0	0.7932	0	0	0	0
ENSG00000169231.13	ENST00000457183.6	0.619802	0	1.30138	0	0	0	0	0	0	0	0
ENSG00000173171.15	ENST00000316721.8	0	0	0	0	0	0	0	0	0	0	2.04781
ENSG00000173171.15	ENST00000609421.1	15.6159	15.565	16.0744	52.1767	58.6255	67.2405	46.1959	45.3483	38.1414	34.3045	26.0293
ENSG00000177628.16	ENST00000368373.8	0	0	2.39486	11.4519	9.25255	5.77536	2.11813	5.06616	4.45255	2.89163	0
ENSG00000177628.16	ENST00000327247.9	0	0	0	0	2.53281	7.62597	0	0	0	0	0
ENSG00000177628.16	ENST00000427500.7	0.846676	0.626353	0	0	0	0	0	0	0	0	2.05885
ENSG00000177628.16	ENST00000428024.3	0	0	0.853628	0	0	0	0	0	0	0	0
ENSG00000160767.22	ENST00000350210.6	0	0	1.1355	0	1.94507	0	0	0	4.80966	0	0
ENSG00000160767.22	ENST00000361361.7	0	0	0	1.66302	0	0	0	5.86408	0	1.44964	0
ENSG00000160767.22	ENST00000368368.7	0	0	0	0	0	0	5.86664	0	0	7.70107	4.80233
ENSG00000116521.11	ENST00000302631.8	0	2.54568	0	0	0	0	0	0	0	0	0
ENSG00000116521.11	ENST00000355379.3	0	0	0	49.2172	42.9244	17.041	22.1868	26.7731	24.8558	14.5806	19.3585
ENSG00000176444.19	ENST00000361168.9	0	0	0	0	0	0	0	0	0	8.67022	6.72611
ENSG00000143630.10	ENST00000368358.4	0.316028	0.268237	0	0.3091	0	0	0	0	0	0.412666	0.316511
ENSG00000143627.19	ENST00000342741.6	5.0838	37.1805	16.0097	0	0	0	4.12235	1.64325	5.94977	1.95267	3.64551
ENSG00000160752.15	ENST00000611010.4	5.94071	0	18.684	0	0	0	0	0	0	0	0
ENSG00000160752.15	ENST00000368356.9	0	18.9143	0	79.7712	66.4503	18.2945	4.03751	14.1783	43.7227	18.7484	12.9145
ENSG00000160752.15	ENST00000467076.5	11.8311	66.4906	23.7299	180.606	213.775	112.327	78.725	129.104	138.984	60.404	56.4034
ENSG00000160752.15	ENST00000356657.10	0	0	0	0	16.9357	0	0	0	0	0	0
ENSG00000160752.15	ENST00000612683.1	0	0	0	50.6671	0	0	69.7072	0	59.632	0	0
ENSG00000160753.17	ENST00000368347.8	0	0	0	5.77226	1.89044	0	2.81551	0	0	0	0
ENSG00000160753.17	ENST00000368349.8	0	0	0	0	0	0	0	0	0	4.80896	0
[truncated: 28,558 more rows]
