# Supplementary material for: Comparison of Alternative Splicing Landscapes Revealed by Long-Read Sequencing in Hepatocyte-Derived HepG2 and Huh7 Cultured Cells and Human Liver Tissue
Source: Biology (Basel). 2023 Dec 6;12(12):1494. doi: 10.3390/biology12121494 (PMC10740679; doi:10.3390/biology12121494)
Supplement: Supplementary file 1 [file biology-12-01494-s001.zip › Table S3.xlsx]

## Sheet: Sheet1
Table S3. Protein-coding genes characterized by the number of splice variants assigned to those genes (the degree of alternative splicing) for each biosample tested.
ENSG	Liver_tissue_3	Liver_tissue_2	Liver_tissue_1	Huh7_3	Huh7_2	Huh7_1	HepG2_5	HepG2_4	HepG2_3	HepG2_2	HepG2_1
ENSG00000187634.13	1	0	0	2	1	1	0	0	0	0	0
ENSG00000188976.11	0	1	1	1	1	1	1	1	1	1	1
ENSG00000187961.15	0	0	0	1	0	1	1	1	1	1	1
ENSG00000187583.11	0	0	0	0	0	0	1	0	1	1	1
ENSG00000187642.10	0	0	0	0	0	0	0	0	1	0	0
ENSG00000188290.11	0	0	0	1	1	2	1	1	1	0	1
ENSG00000187608.10	1	1	1	2	1	1	1	1	1	1	1
ENSG00000188157.15	1	0	1	1	1	1	1	1	1	1	1
ENSG00000131591.18	0	0	0	1	1	0	0	1	0	1	1
ENSG00000186827.11	0	0	0	0	0	0	0	0	0	0	1
ENSG00000078808.19	1	1	2	1	1	2	2	2	2	2	1
ENSG00000176022.7	0	1	1	1	1	1	1	1	1	1	1
ENSG00000184163.3	0	0	0	0	1	1	0	1	0	0	0
ENSG00000160087.21	1	1	1	2	1	1	1	1	2	1	1
ENSG00000162572.21	0	1	1	0	0	0	1	1	1	1	1
ENSG00000131584.19	0	1	1	1	1	1	1	1	1	1	1
ENSG00000169972.12	1	1	1	1	1	1	1	1	1	1	1
ENSG00000127054.22	1	2	2	2	4	2	4	4	4	3	3
ENSG00000224051.7	1	1	1	1	1	1	1	2	1	1	1
ENSG00000169962.5	0	1	1	0	0	0	0	0	0	0	0
ENSG00000107404.21	1	1	1	1	1	1	1	2	2	1	1
ENSG00000162576.17	1	0	1	1	1	1	1	1	1	1	1
ENSG00000175756.14	2	2	2	3	3	2	2	2	3	2	2
ENSG00000221978.13	1	0	0	1	1	1	1	0	1	0	1
ENSG00000242485.6	1	1	1	2	1	1	2	1	1	2	1
ENSG00000235098.9	0	0	0	0	1	1	1	1	1	2	2
ENSG00000205116.4	0	0	0	0	0	0	1	1	1	1	0
ENSG00000179403.12	1	2	2	2	2	1	2	2	2	2	1
ENSG00000215915.10	0	1	0	0	0	0	1	1	0	1	1
ENSG00000160072.20	0	0	1	2	1	1	1	2	1	1	1
ENSG00000197785.14	1	1	1	1	1	1	2	1	1	0	1
ENSG00000205090.9	0	0	0	0	0	1	0	0	0	1	0
ENSG00000160075.12	2	2	2	2	2	2	2	2	2	2	2
ENSG00000228594.4	0	0	0	1	1	1	1	1	1	1	1
ENSG00000197530.13	1	2	1	0	1	1	1	1	1	3	2
ENSG00000189409.14	1	0	0	0	0	1	0	0	0	0	0
ENSG00000248333.9	0	1	1	1	1	1	1	1	1	1	1
ENSG00000189339.12	1	1	1	1	1	1	1	1	1	1	1
ENSG00000008128.23	1	0	1	1	1	1	1	1	1	3	1
ENSG00000008130.15	1	1	1	1	1	1	2	1	1	2	1
ENSG00000078369.18	1	1	1	2	2	1	2	1	1	2	2
ENSG00000178821.13	1	0	1	1	0	1	2	2	1	1	1
ENSG00000067606.17	0	0	1	1	0	1	1	2	1	1	1
ENSG00000162585.17	1	1	2	2	2	1	2	2	2	2	1
ENSG00000157933.10	1	1	1	1	1	1	1	1	1	1	1
ENSG00000116151.14	0	0	0	0	1	1	0	0	0	0	0
ENSG00000157916.20	2	2	2	2	2	2	2	2	2	2	2
ENSG00000157911.11	0	2	1	1	1	1	1	3	2	2	2
ENSG00000149527.18	0	0	0	0	0	0	0	1	1	0	0
ENSG00000157881.16	1	0	1	1	1	1	1	1	1	1	1
ENSG00000157873.18	0	1	1	0	0	0	1	1	1	1	1
ENSG00000157870.17	0	0	0	1	0	0	1	0	0	1	0
ENSG00000142606.16	0	0	0	0	0	0	1	0	0	0	0
ENSG00000215912.12	0	0	0	0	0	1	1	0	1	1	0
ENSG00000142611.17	0	0	0	1	1	2	0	0	0	0	0
ENSG00000130762.15	1	1	0	1	1	1	1	1	1	1	1
ENSG00000162591.16	1	0	0	0	0	0	1	1	1	1	2
ENSG00000158109.15	1	1	1	1	1	1	1	1	2	2	1
ENSG00000116213.16	1	1	1	1	1	1	1	1	1	1	1
ENSG00000078900.15	0	0	0	0	1	0	0	0	0	0	0
ENSG00000235169.11	0	1	1	1	1	0	2	2	3	2	2
ENSG00000130764.10	1	1	1	1	1	1	1	1	1	1	1
ENSG00000116198.14	1	1	1	1	2	1	2	3	2	2	0
ENSG00000169598.17	0	0	0	0	0	1	1	1	1	0	1
ENSG00000198912.12	2	1	1	1	1	1	1	1	1	0	1
ENSG00000069424.16	0	1	1	1	1	2	3	3	2	3	3
ENSG00000116251.11	2	3	2	2	3	2	4	2	3	2	2
ENSG00000158286.13	1	0	0	0	0	1	1	1	1	0	1
ENSG00000116237.16	1	1	1	1	1	1	1	1	1	1	1
ENSG00000158292.7	0	0	0	0	0	1	0	0	0	1	0
ENSG00000097021.20	1	1	1	2	2	2	2	2	1	2	2
ENSG00000069812.11	0	0	0	1	0	0	1	0	0	0	0
ENSG00000187017.18	3	4	2	3	1	1	4	4	6	4	2
ENSG00000215788.11	0	0	0	0	1	0	0	0	0	0	0
ENSG00000171680.23	0	0	0	0	0	0	1	1	1	1	1
ENSG00000162408.11	1	1	1	1	1	1	1	1	1	1	1
ENSG00000173662.21	0	0	0	0	0	0	1	0	0	0	1
ENSG00000204859.13	1	1	1	0	1	0	1	1	1	1	1
ENSG00000162413.17	1	1	0	1	1	1	2	1	1	2	1
ENSG00000116273.6	1	1	0	1	1	1	1	1	1	1	1
ENSG00000041988.16	1	0	1	1	2	1	1	2	1	1	1
ENSG00000007923.17	1	1	1	1	0	1	1	1	1	1	1
ENSG00000171735.19	0	1	1	1	1	1	1	1	2	3	2
ENSG00000049245.13	1	1	1	1	1	1	1	1	1	1	1
ENSG00000049246.15	1	1	1	0	0	0	1	0	1	1	0
ENSG00000049249.9	0	0	0	0	0	1	0	0	0	0	0
ENSG00000116288.13	2	3	3	3	3	2	3	2	2	3	3
ENSG00000116285.13	1	1	1	1	1	1	1	1	1	1	2
ENSG00000142599.19	1	2	1	1	2	1	1	1	2	4	1
ENSG00000074800.16	1	2	1	1	2	2	2	2	2	2	2
ENSG00000197241.4	0	0	0	0	1	0	0	0	0	0	0
ENSG00000180758.12	0	0	1	1	1	1	1	1	1	1	1
ENSG00000049239.13	1	1	1	1	0	1	1	1	1	1	1
ENSG00000171621.14	1	0	1	1	1	1	1	2	1	1	1
ENSG00000171612.7	1	1	1	1	1	1	1	1	1	1	1
ENSG00000188807.13	0	2	1	2	2	2	2	2	2	2	2
ENSG00000171608.17	1	1	0	0	0	1	1	1	1	1	1
ENSG00000171603.18	0	1	1	1	1	1	0	1	1	1	0
ENSG00000178585.15	1	1	1	2	2	2	2	2	2	2	2
ENSG00000162441.12	2	2	1	2	2	1	3	2	3	2	2
ENSG00000173614.14	1	1	1	2	2	1	1	1	1	1	1
ENSG00000162444.12	1	0	1	1	1	0	0	0	0	0	0
ENSG00000130939.20	2	0	1	1	1	1	2	2	1	2	2
ENSG00000054523.20	4	3	6	6	6	6	4	6	5	6	5
ENSG00000142657.21	1	1	1	1	1	1	1	1	1	1	1
ENSG00000251503.8	0	0	0	1	1	1	0	1	1	0	0
ENSG00000175279.22	1	1	1	1	1	1	1	1	1	0	1
ENSG00000241563.4	0	0	1	1	0	0	1	0	0	0	0
ENSG00000160049.12	1	2	2	2	2	2	2	2	2	2	2
ENSG00000142655.13	1	1	1	1	1	1	1	1	1	1	1
ENSG00000130940.15	1	0	1	2	1	2	1	0	2	1	2
ENSG00000120948.19	1	1	1	2	2	2	2	1	1	1	1
ENSG00000009724.17	2	2	2	0	0	0	1	2	1	1	2
ENSG00000116649.10	1	1	1	1	1	1	1	1	1	1	1
ENSG00000171824.14	0	0	0	1	1	1	1	1	1	1	1
ENSG00000198793.13	1	1	1	2	1	1	2	2	2	2	1
ENSG00000120942.14	1	1	1	1	1	1	1	1	1	1	1
ENSG00000116661.11	1	1	1	1	1	1	1	1	1	1	1
ENSG00000132879.14	1	2	1	1	1	1	2	2	2	2	2
ENSG00000116663.11	1	1	1	1	1	1	1	1	1	1	1
ENSG00000116670.15	2	1	1	1	1	2	1	2	1	1	1
ENSG00000177674.16	1	1	1	1	1	1	1	1	1	1	1
ENSG00000177000.13	1	1	0	0	1	1	2	1	1	1	1
ENSG00000011021.23	0	1	0	1	1	1	1	1	1	1	1
ENSG00000120937.9	0	0	0	1	1	1	0	1	0	0	0
ENSG00000116685.16	1	1	1	1	1	1	1	1	1	1	1
ENSG00000083444.17	0	1	1	1	1	0	1	1	1	1	1
ENSG00000116688.18	1	2	2	2	3	3	3	3	4	3	2
ENSG00000116691.11	1	1	1	1	1	1	1	1	1	1	1
ENSG00000048707.15	4	4	3	4	4	4	3	4	4	4	3
ENSG00000162496.9	1	1	1	2	1	1	1	1	1	1	1
ENSG00000243073.4	0	0	1	0	0	0	0	0	0	0	0
ENSG00000116731.23	3	2	1	1	1	2	3	1	1	2	1
ENSG00000189337.17	1	0	1	0	0	0	1	1	1	1	1
ENSG00000171729.14	0	1	0	1	0	1	1	1	1	1	1
ENSG00000142634.13	1	1	1	1	1	1	1	1	1	1	1
ENSG00000132906.18	0	1	0	1	1	2	0	1	1	0	0
ENSG00000116138.13	1	1	1	1	1	1	1	1	1	1	1
ENSG00000116771.6	1	1	1	1	1	1	1	1	1	1	1
ENSG00000197312.12	1	1	1	1	1	1	1	1	1	1	1
ENSG00000116786.13	1	1	1	1	1	1	1	1	1	1	1
ENSG00000162461.8	1	0	1	0	0	1	0	0	0	0	0
ENSG00000162460.7	1	1	1	1	1	1	1	1	1	1	1
ENSG00000162458.13	0	1	0	1	1	1	1	1	1	1	1
ENSG00000233954.7	0	0	0	1	0	1	1	0	0	0	1
ENSG00000065526.12	1	0	1	1	1	1	1	1	1	1	1
ENSG00000116809.12	1	1	1	2	2	2	1	1	1	1	1
ENSG00000183888.4	0	0	0	0	0	0	1	1	1	1	1
ENSG00000142627.13	0	1	1	1	1	1	1	1	1	1	1
ENSG00000132881.12	0	0	1	0	0	0	0	0	0	0	0
ENSG00000037637.11	1	1	0	1	1	1	1	1	1	1	1
ENSG00000055070.17	1	1	1	1	1	1	1	1	1	1	1
ENSG00000187144.11	0	0	0	0	0	0	0	1	0	0	1
ENSG00000157191.20	1	1	1	1	1	1	0	1	1	1	1
ENSG00000219481.11	1	1	0	1	1	1	1	1	1	1	1
ENSG00000058453.17	0	0	1	0	1	0	0	1	1	1	1
ENSG00000117122.14	0	0	0	1	1	1	0	0	1	0	1
ENSG00000159363.19	0	1	0	1	0	0	1	1	1	1	1
ENSG00000117118.10	1	1	1	1	1	1	1	1	1	1	1
ENSG00000142623.11	0	0	1	0	0	0	0	0	0	0	0
ENSG00000179051.14	0	0	1	1	1	1	1	1	1	1	1
ENSG00000074964.17	1	0	0	1	0	0	1	1	1	1	1
ENSG00000117154.12	0	0	1	0	0	0	0	0	0	0	0
ENSG00000179023.9	1	1	1	0	0	0	1	1	1	0	0
ENSG00000159423.17	1	1	1	1	1	1	1	1	1	1	1
ENSG00000169991.11	0	1	0	1	1	1	1	1	1	1	1
ENSG00000127481.15	3	2	3	2	4	4	2	2	3	2	2
ENSG00000127463.16	1	2	1	1	2	1	3	2	2	3	3
ENSG00000053372.5	1	1	1	1	1	1	1	1	1	1	1
ENSG00000162482.5	1	1	1	0	0	0	0	1	0	0	0
ENSG00000053371.13	1	1	1	1	1	1	2	2	2	2	1
ENSG00000040487.13	0	0	0	0	0	1	1	2	1	1	1
ENSG00000077549.19	1	2	1	2	2	4	1	2	2	3	1
ENSG00000173436.15	1	0	0	1	1	1	0	1	1	1	0
ENSG00000158747.15	1	0	1	1	1	1	1	1	1	1	1
ENSG00000162542.14	0	0	0	0	0	0	0	0	1	1	1
ENSG00000178828.7	0	0	0	0	0	0	0	0	0	0	1
ENSG00000169914.6	1	0	0	1	0	1	1	0	0	0	0
ENSG00000188784.4	0	0	0	0	0	0	0	0	1	0	0
ENSG00000188257.12	1	1	0	0	0	0	1	1	1	1	1
ENSG00000127472.11	1	0	0	0	0	0	0	0	0	0	0
ENSG00000162543.6	0	1	0	0	0	0	0	0	1	0	1
ENSG00000162545.6	1	1	1	1	1	1	1	1	1	1	1
ENSG00000090432.7	1	1	1	1	1	1	1	1	1	1	1
ENSG00000183114.8	0	0	0	1	0	0	1	1	1	1	1
ENSG00000158825.6	0	0	1	0	0	0	0	0	0	0	0
ENSG00000158828.8	1	1	1	1	1	1	1	1	1	1	1
ENSG00000244038.11	1	1	1	1	1	1	1	1	1	1	1
ENSG00000127483.19	2	1	1	1	2	1	1	1	1	2	2
ENSG00000075151.24	1	2	1	1	3	2	2	1	1	2	1
ENSG00000117298.16	1	1	1	1	1	1	1	1	1	1	1
ENSG00000142794.19	1	1	0	0	0	1	1	0	0	0	0
ENSG00000162551.14	1	1	1	0	0	0	1	1	1	0	0
ENSG00000076864.21	0	0	0	0	0	0	1	0	1	1	1
ENSG00000090686.16	1	1	2	2	2	2	3	2	2	2	3
ENSG00000142798.20	1	1	0	1	1	1	1	1	1	1	1
ENSG00000289694.1	1	1	1	0	0	1	1	1	1	0	1
ENSG00000070831.18	5	5	2	7	5	6	5	5	5	6	4
ENSG00000162552.15	0	1	0	0	0	0	0	0	0	0	0
ENSG00000184677.18	3	3	0	3	3	3	3	2	3	3	3
ENSG00000173372.18	2	1	2	0	0	0	0	0	0	0	0
ENSG00000159189.13	1	1	1	0	0	0	0	0	0	0	0
ENSG00000173369.18	1	2	1	0	0	0	0	0	0	0	0
ENSG00000133216.17	0	0	0	0	0	2	0	0	0	0	0
ENSG00000215906.9	0	0	0	0	0	0	0	1	0	0	0
ENSG00000004487.18	0	1	2	2	2	3	4	3	4	2	2
ENSG00000169641.14	1	0	0	1	1	1	1	1	1	1	1
ENSG00000179546.5	0	0	0	0	0	0	0	0	1	0	0
ENSG00000125944.21	1	1	1	2	2	2	2	2	2	1	2
ENSG00000125945.15	1	1	1	0	1	0	1	0	1	0	1
ENSG00000204219.11	1	1	2	1	1	1	1	2	2	1	1
ENSG00000088280.20	1	1	0	2	1	1	2	1	1	1	1
ENSG00000007968.7	0	0	0	1	1	1	1	1	1	1	0
ENSG00000117318.9	1	1	1	1	1	1	1	1	1	1	1
ENSG00000142676.14	1	1	1	1	1	1	1	2	2	2	2
ENSG00000057757.10	1	1	1	1	1	2	1	1	1	1	1
ENSG00000011009.11	1	1	1	1	1	1	1	1	1	1	1
ENSG00000117308.15	2	2	1	1	2	2	1	1	1	1	1
ENSG00000117305.15	3	1	1	1	1	1	1	1	1	1	1
ENSG00000179163.12	1	1	1	1	1	1	1	1	1	1	1
ENSG00000189266.13	1	1	1	1	1	1	1	1	1	1	1
ENSG00000188529.15	2	2	3	3	3	3	3	3	3	3	3
ENSG00000142661.19	0	0	0	0	0	0	1	2	2	1	1
ENSG00000142677.4	1	1	1	0	1	1	1	1	1	1	1
ENSG00000185436.12	1	1	1	0	0	2	1	1	1	1	1
ENSG00000158055.17	0	0	0	0	0	0	1	0	0	0	0
ENSG00000001460.18	0	0	0	0	0	1	0	1	1	0	0
ENSG00000001461.17	1	1	0	0	0	1	2	1	2	1	1
ENSG00000117602.13	0	1	0	1	2	1	2	2	2	2	1
ENSG00000184454.7	1	1	1	0	0	1	1	1	1	0	1
ENSG00000133226.18	1	1	1	1	1	1	1	1	1	1	1
ENSG00000169504.15	1	1	1	1	1	1	1	1	1	1	1
ENSG00000020633.19	0	1	1	0	0	0	0	1	0	0	0
ENSG00000117614.10	1	1	1	1	1	1	1	1	1	1	1
ENSG00000117616.18	0	0	0	0	1	0	0	1	0	0	1
ENSG00000187010.21	0	0	0	0	0	0	0	0	0	1	0
ENSG00000183726.11	1	1	1	1	1	1	1	1	1	1	1
ENSG00000188672.19	0	0	1	0	0	0	0	0	0	0	0
ENSG00000204178.11	2	1	1	1	1	1	1	1	1	1	1
ENSG00000157978.12	1	1	1	1	1	1	1	1	1	1	1
ENSG00000117643.15	1	2	1	1	1	1	0	0	0	0	0
ENSG00000162430.18	0	1	1	1	1	1	1	1	1	1	1
ENSG00000117640.18	1	1	2	1	1	1	1	1	1	1	1
ENSG00000127423.11	0	0	0	1	1	1	1	1	1	1	1
ENSG00000182749.6	1	1	1	0	0	1	1	1	1	1	1
ENSG00000117632.23	1	1	1	2	2	2	2	2	2	2	2
ENSG00000158006.14	1	1	1	1	1	1	1	1	2	1	1
ENSG00000158008.10	0	0	0	0	0	0	0	0	0	1	1
ENSG00000175087.10	1	1	1	1	0	0	1	1	1	1	0
ENSG00000142684.9	1	1	1	1	1	1	1	1	1	1	1
ENSG00000130695.16	0	0	0	1	0	0	1	2	1	1	1
ENSG00000142669.15	1	1	1	1	1	1	1	1	1	1	1
ENSG00000158062.21	0	0	0	1	1	1	1	1	1	1	0
ENSG00000169442.9	1	1	1	0	0	0	0	1	0	0	0
ENSG00000176092.17	0	0	0	1	1	1	0	0	0	0	1
ENSG00000176083.18	0	0	1	0	0	0	0	0	0	0	0
ENSG00000117682.17	1	2	1	1	2	1	3	2	2	1	2
ENSG00000198830.11	2	2	1	2	2	2	2	2	2	1	2
ENSG00000117676.14	1	1	1	1	1	1	1	1	1	1	1
ENSG00000117713.21	1	1	1	1	2	2	1	1	2	2	1
ENSG00000060642.12	5	4	3	1	2	1	1	1	3	2	2
ENSG00000204160.12	1	1	1	1	1	1	1	1	1	1	1
ENSG00000175793.12	0	0	0	1	1	1	1	1	1	1	1
ENSG00000142751.15	2	1	1	1	2	2	1	1	2	1	1
ENSG00000198746.13	1	1	1	1	1	2	1	1	1	1	1
ENSG00000090273.14	1	1	1	1	1	1	1	1	1	1	1
ENSG00000131910.5	1	1	1	1	1	1	1	1	1	1	1
ENSG00000175707.10	0	1	1	1	0	1	1	1	1	1	1
ENSG00000253368.4	1	0	0	1	1	1	1	1	1	1	1
ENSG00000158246.8	0	0	0	1	1	1	0	1	0	0	0
ENSG00000090020.11	0	0	0	0	0	0	1	0	0	1	1
ENSG00000142784.16	1	1	1	1	1	1	1	1	1	1	1
ENSG00000186501.15	1	1	1	0	1	1	1	1	1	1	1
ENSG00000142765.18	0	0	0	1	1	0	0	1	1	0	1
ENSG00000142733.17	0	1	0	1	0	1	1	0	0	0	0
ENSG00000142748.13	1	1	1	0	0	0	0	0	0	0	0
ENSG00000181773.7	0	0	0	0	0	0	1	1	0	0	1
ENSG00000158195.11	1	1	1	1	1	1	1	1	1	1	1
ENSG00000126705.15	1	0	1	1	1	1	1	1	1	1	1
ENSG00000126709.16	1	1	1	0	1	1	1	1	1	1	1
ENSG00000009780.16	1	1	1	1	1	1	1	1	2	1	1
ENSG00000117758.14	1	1	1	1	1	1	1	1	1	1	1
ENSG00000117751.18	1	1	1	1	1	1	1	1	1	1	1
ENSG00000130775.16	1	1	0	1	1	0	0	0	0	0	0
ENSG00000117748.10	1	1	1	1	1	1	1	1	1	1	1
ENSG00000130768.15	0	1	0	2	1	2	1	1	1	0	1
ENSG00000158156.9	1	1	0	1	1	1	1	1	1	1	1
ENSG00000158161.16	1	1	1	1	1	1	1	1	1	0	1
ENSG00000169403.12	0	0	0	1	0	0	0	1	0	1	1
ENSG00000126698.11	1	1	1	1	1	0	1	1	1	0	1
ENSG00000130770.18	3	3	2	4	3	3	2	2	2	2	3
ENSG00000130766.5	1	1	1	1	1	1	1	1	1	1	1
ENSG00000130772.14	1	1	1	1	1	1	1	1	1	1	1
ENSG00000204138.13	0	0	1	1	0	0	1	1	1	1	1
ENSG00000180198.17	1	0	1	2	2	1	2	2	2	2	2
ENSG00000120656.14	1	1	1	1	0	1	3	2	0	1	2
ENSG00000188060.8	0	0	0	1	0	0	1	1	1	1	1
ENSG00000162419.13	0	0	1	1	1	0	1	1	1	0	1
ENSG00000198492.16	1	1	1	1	1	1	1	1	1	1	1
ENSG00000116329.12	0	0	0	0	0	0	0	1	1	0	0
ENSG00000159023.22	1	1	0	1	1	0	1	1	1	1	1
ENSG00000253304.2	1	0	1	1	1	1	1	0	0	1	0
ENSG00000116350.18	1	1	1	1	1	1	1	1	1	1	1
ENSG00000116353.16	0	1	1	1	1	0	1	1	1	1	1
ENSG00000060656.20	1	1	1	1	1	1	1	1	1	1	1
ENSG00000162511.8	1	1	1	0	0	0	0	1	0	0	1
ENSG00000162512.16	1	1	1	1	1	1	1	1	0	1	1
ENSG00000134644.16	1	1	1	1	1	1	1	1	1	1	1
ENSG00000084628.10	0	0	0	0	1	1	0	0	1	0	0
ENSG00000060688.13	1	1	1	1	1	1	1	1	1	1	1
ENSG00000121766.16	1	1	1	1	1	1	2	2	2	1	1
ENSG00000121769.8	1	0	0	0	0	1	0	0	0	0	0
ENSG00000168528.12	1	1	1	1	1	1	1	1	1	1	1
ENSG00000142910.16	1	0	1	1	1	1	1	1	1	1	1
ENSG00000162517.13	1	1	1	1	1	1	1	1	1	1	1
ENSG00000084636.18	0	0	0	0	0	0	1	1	0	1	1
ENSG00000184007.22	3	2	1	2	1	3	1	1	1	1	1
ENSG00000121774.18	1	1	1	0	1	1	1	1	1	1	1
ENSG00000025800.14	1	1	1	1	1	1	1	1	1	1	1
ENSG00000084652.16	1	1	1	1	1	1	1	1	1	1	1
ENSG00000160050.16	0	0	0	0	0	2	0	0	1	0	0
ENSG00000160051.12	0	0	0	0	0	0	0	1	0	1	0
ENSG00000160055.20	1	1	0	1	1	1	1	1	1	1	1
ENSG00000084623.12	3	5	2	5	5	6	5	4	4	3	4
ENSG00000183615.6	0	1	1	0	0	0	1	0	0	1	0
ENSG00000182866.17	0	0	1	0	0	0	1	0	0	1	1
ENSG00000116478.12	1	1	1	1	1	1	1	1	1	1	1
ENSG00000175130.7	1	1	1	1	1	1	1	1	1	1	1
ENSG00000225828.2	1	0	0	0	0	0	0	1	0	0	0
ENSG00000160058.19	0	0	0	0	0	0	0	0	0	2	1
ENSG00000160062.15	1	1	1	1	0	1	0	1	0	0	1
ENSG00000176261.16	1	1	2	2	2	2	2	2	2	2	3
ENSG00000162521.19	1	1	1	1	1	1	1	1	1	1	1
ENSG00000162520.15	0	0	1	0	0	1	1	1	1	1	1
ENSG00000162522.11	1	1	1	1	1	1	1	1	1	1	1
ENSG00000134684.13	1	1	1	1	1	0	1	1	1	1	1
ENSG00000116497.18	1	0	1	1	1	1	1	1	1	1	1
ENSG00000160097.20	0	1	0	0	0	0	1	0	0	0	0
ENSG00000121900.19	1	1	0	1	1	1	1	1	1	1	0
ENSG00000116514.17	1	1	1	1	1	1	1	1	1	1	1
ENSG00000004455.18	2	1	2	1	2	2	2	1	1	3	1
ENSG00000116525.14	0	0	0	0	1	0	0	0	0	1	1
ENSG00000160094.15	1	0	1	1	1	1	1	1	1	1	1
ENSG00000134686.20	1	0	0	0	0	0	0	0	1	1	2
ENSG00000121903.15	0	0	0	0	1	1	0	1	2	2	1
ENSG00000163866.9	3	2	3	2	3	3	3	2	3	3	2
ENSG00000188910.8	0	0	1	0	0	0	0	0	0	0	0
ENSG00000187513.9	1	1	1	0	0	0	0	0	0	0	0
ENSG00000116544.12	0	0	0	1	0	0	0	0	0	0	0
ENSG00000243749.1	1	1	1	1	1	1	1	1	1	1	1
ENSG00000163867.17	1	0	0	1	1	1	1	0	0	1	1
ENSG00000197056.11	0	0	0	0	0	0	0	1	0	0	0
ENSG00000116560.12	1	1	1	1	1	1	1	1	1	1	1
ENSG00000146463.12	1	1	1	1	1	1	1	1	1	1	1
ENSG00000142687.18	1	1	1	1	1	1	1	1	1	1	1
ENSG00000020129.16	0	1	0	1	1	2	1	1	1	1	1
ENSG00000116819.9	0	0	0	0	0	0	0	1	0	0	0
ENSG00000126067.12	1	1	1	1	1	1	1	1	1	1	1
ENSG00000142686.8	1	0	0	1	1	1	1	0	0	0	0
ENSG00000092853.14	0	0	0	1	1	1	1	2	1	0	1
ENSG00000134698.11	1	1	1	1	1	1	1	1	1	1	1
ENSG00000092847.13	2	3	3	3	3	2	3	3	2	3	3
ENSG00000126070.20	1	1	1	1	3	1	2	3	3	2	2
ENSG00000116863.11	1	1	1	1	1	1	1	1	1	1	1
ENSG00000171812.13	0	0	0	0	1	0	1	0	0	0	1
ENSG00000054116.12	2	1	1	1	2	2	1	2	2	2	2
ENSG00000116871.16	0	0	0	1	0	1	1	1	0	0	1
ENSG00000054118.15	1	1	1	1	1	1	1	1	1	1	1
ENSG00000214193.11	0	0	0	0	1	0	1	1	2	1	1
ENSG00000142694.7	1	1	0	1	1	1	1	1	1	1	1
ENSG00000196182.11	1	1	1	1	1	1	1	1	1	2	1
ENSG00000181817.6	1	1	1	1	1	1	1	1	1	1	1
ENSG00000116885.18	0	1	0	1	1	1	0	0	0	0	0
ENSG00000116898.12	1	1	1	1	1	1	1	1	1	1	1
ENSG00000119535.18	1	1	0	1	1	0	1	1	1	1	1
ENSG00000163873.10	0	0	1	0	0	0	0	0	0	0	0
ENSG00000163874.11	1	0	1	1	1	1	1	1	1	1	1
ENSG00000163875.16	0	1	0	1	1	2	1	0	1	0	0
ENSG00000163877.11	1	0	1	1	1	1	1	1	1	1	1
ENSG00000163879.11	1	1	1	1	0	1	0	0	0	0	0
ENSG00000134697.13	1	1	1	1	1	1	1	1	1	1	1
ENSG00000116922.15	1	0	1	1	1	1	1	1	1	1	1
ENSG00000134690.11	0	0	0	1	1	1	1	1	1	1	1
ENSG00000185090.15	1	1	1	1	1	1	2	1	1	1	1
ENSG00000196449.4	1	1	1	1	1	1	1	1	1	1	1
ENSG00000197982.14	1	1	1	1	2	1	2	2	2	1	2
ENSG00000188786.10	0	0	0	1	0	1	1	1	1	1	1
ENSG00000204084.13	0	1	1	0	1	1	1	0	0	1	1
ENSG00000183431.12	1	1	1	1	1	1	1	1	1	1	1
ENSG00000183520.12	1	1	1	1	1	1	1	1	1	1	1
ENSG00000116954.8	1	1	1	1	1	1	1	1	1	1	1
ENSG00000214114.9	1	1	1	1	2	1	1	2	1	2	1
ENSG00000274944.4	1	0	0	1	1	1	1	1	1	0	1
ENSG00000158315.11	0	0	0	0	0	0	1	1	1	1	1
ENSG00000174574.16	1	1	1	1	1	1	1	1	1	1	1
ENSG00000168653.11	1	1	1	1	1	1	2	1	1	1	1
ENSG00000127603.32	7	7	8	8	8	8	8	7	6	8	7
ENSG00000183682.8	0	0	0	1	1	1	0	0	0	0	0
ENSG00000090621.15	3	2	1	2	2	2	3	2	2	3	3
ENSG00000163909.8	1	1	1	0	1	0	0	0	1	0	0
ENSG00000084072.17	1	1	2	2	1	1	0	1	1	1	0
ENSG00000116985.12	0	0	0	1	1	1	0	1	1	1	0
ENSG00000198754.5	0	0	0	0	0	0	1	0	0	0	0
ENSG00000043514.17	1	1	0	1	1	1	0	1	1	0	0
ENSG00000116990.11	1	0	1	0	1	1	0	0	0	1	1
ENSG00000168389.18	1	1	1	1	0	0	0	0	0	0	0
ENSG00000131236.18	1	1	1	2	1	1	2	1	1	1	1
ENSG00000131238.18	1	2	1	3	2	2	1	2	2	1	3
ENSG00000117000.9	1	1	0	1	1	1	1	1	1	1	1
ENSG00000084073.10	1	1	1	1	1	1	1	1	1	1	1
ENSG00000049089.15	0	0	0	1	1	1	1	1	1	1	1
ENSG00000084070.12	2	1	1	1	2	1	1	1	1	1	1
ENSG00000187801.15	0	0	0	0	0	0	0	1	1	1	0
ENSG00000187815.10	1	0	1	0	0	0	1	1	1	1	0
ENSG00000164002.12	0	0	1	1	0	1	1	1	2	0	1
ENSG00000117010.17	1	2	0	1	1	1	1	0	2	1	1
ENSG00000117016.10	0	0	0	0	0	0	0	1	1	1	0
ENSG00000066136.21	1	2	2	2	2	1	2	1	2	1	1
ENSG00000179862.7	1	1	1	1	1	1	1	1	1	1	1
ENSG00000171793.17	1	2	2	3	4	3	2	1	1	1	1
ENSG00000171790.16	0	0	0	0	0	0	0	0	0	1	0
ENSG00000010803.17	1	0	1	1	1	2	1	1	2	1	1
ENSG00000044012.4	1	1	0	0	0	0	0	0	0	0	0
ENSG00000197273.4	0	0	0	0	0	1	0	0	0	0	0
ENSG00000198815.9	1	1	1	1	1	1	1	1	1	1	1
ENSG00000177181.15	0	0	0	0	0	0	1	1	1	0	1
ENSG00000127125.9	2	2	2	1	0	1	0	0	0	0	0
ENSG00000186409.19	0	0	0	0	0	0	0	0	1	0	0
ENSG00000171960.12	0	0	1	3	4	2	2	2	3	0	1
ENSG00000065978.19	2	2	2	2	2	2	2	2	2	1	2
ENSG00000164007.11	0	0	0	0	1	0	0	1	1	1	1
ENSG00000117385.16	1	1	1	2	1	1	2	3	2	1	1
ENSG00000164008.17	0	0	0	0	0	0	0	1	0	1	1
ENSG00000177868.12	1	1	1	1	1	1	1	1	1	1	1
ENSG00000164010.15	0	0	0	0	0	0	0	1	1	0	0
ENSG00000164011.18	1	1	1	1	1	1	1	1	1	1	1
ENSG00000117394.24	0	0	0	1	0	0	2	2	1	2	2
ENSG00000186973.11	0	0	0	0	1	1	0	1	1	0	0
ENSG00000117395.13	1	1	1	1	1	1	1	1	1	1	1
ENSG00000253313.6	1	1	0	0	1	1	0	1	1	1	1
ENSG00000066056.14	0	1	1	0	0	0	0	0	0	0	1
ENSG00000117399.14	0	0	0	1	1	1	1	1	1	1	1
ENSG00000066322.15	1	1	1	1	1	1	1	1	1	1	1
ENSG00000159479.17	1	1	1	2	2	1	2	2	2	1	2
ENSG00000198198.17	2	2	2	2	2	3	2	3	2	2	2
ENSG00000178922.18	2	2	2	2	2	2	1	0	0	0	0
ENSG00000142949.17	2	2	1	1	1	1	2	2	2	2	2
ENSG00000066135.13	1	1	1	1	1	1	1	1	1	1	1
ENSG00000126091.21	2	0	1	2	2	1	1	0	2	2	1
ENSG00000117407.17	0	0	0	0	1	0	1	0	0	1	0
ENSG00000117408.11	1	1	1	1	1	1	1	1	1	2	1
ENSG00000132768.14	0	0	1	0	0	1	0	0	0	0	1
ENSG00000117410.14	1	1	2	2	1	2	1	2	2	1	2
ENSG00000117411.18	0	1	0	0	2	1	3	1	2	2	2
ENSG00000159214.13	0	1	0	0	0	0	0	0	1	0	0
ENSG00000196517.13	0	0	1	0	1	1	1	1	1	1	1
ENSG00000178028.14	1	1	1	1	1	1	1	1	1	1	1
ENSG00000117419.16	1	2	2	1	2	2	1	1	1	1	1
ENSG00000187147.18	0	0	0	1	1	1	1	1	1	1	1
ENSG00000126106.14	1	2	2	2	2	2	2	2	3	3	2
ENSG00000198520.12	0	1	0	0	0	0	0	0	0	0	0
ENSG00000142945.13	0	0	1	1	1	1	1	1	1	1	1
ENSG00000142937.12	2	2	2	2	2	2	2	2	2	2	2
ENSG00000142959.5	0	0	0	0	0	0	1	1	1	1	1
ENSG00000173846.13	1	0	0	1	0	1	1	1	1	1	0
ENSG00000188396.4	1	0	1	0	0	1	0	0	0	0	0
ENSG00000222009.9	0	0	0	0	0	0	0	0	1	0	0
ENSG00000117425.14	1	0	0	0	0	0	1	2	1	0	0
ENSG00000070785.17	1	1	1	1	2	2	1	2	1	1	1
ENSG00000126107.15	0	1	0	1	0	0	1	1	1	1	1
ENSG00000126088.14	1	1	1	1	1	2	2	1	1	1	1
ENSG00000162415.7	1	0	0	1	1	1	1	1	1	1	1
ENSG00000132781.20	0	1	0	2	0	2	1	1	1	2	1
ENSG00000132773.12	1	1	1	1	1	1	1	1	1	1	1
ENSG00000070759.17	0	1	1	1	1	1	1	0	1	1	1
ENSG00000132763.15	1	2	2	2	1	1	1	2	1	1	1
ENSG00000117450.15	2	2	2	3	4	3	2	2	4	2	2
ENSG00000117448.14	1	1	1	2	2	1	3	2	3	2	1
ENSG00000132780.17	1	1	2	2	2	2	2	2	2	3	3
ENSG00000159592.11	1	1	1	1	1	1	1	1	1	1	1
ENSG00000159596.7	1	1	1	1	1	1	1	1	1	1	1
ENSG00000197429.11	0	0	1	1	1	0	1	0	1	0	0
ENSG00000086015.23	0	1	0	1	1	1	1	1	1	1	1
ENSG00000117461.15	1	0	1	1	1	1	1	1	1	0	0
ENSG00000117472.10	1	0	1	0	1	0	1	1	1	1	1
ENSG00000085998.15	0	2	1	2	2	3	2	2	1	1	1
ENSG00000085999.13	0	0	0	1	0	1	1	1	1	0	1
ENSG00000132128.18	1	1	1	1	2	1	1	1	1	1	1
ENSG00000173660.12	1	1	1	1	1	1	1	1	1	1	1
ENSG00000117481.11	1	0	0	2	2	1	2	2	1	2	1
ENSG00000117480.16	1	1	1	1	0	0	1	0	1	1	1
ENSG00000079277.22	0	1	0	2	1	2	2	2	1	1	1
ENSG00000142961.16	1	1	0	0	0	1	0	0	1	1	0
ENSG00000123472.13	2	2	2	1	2	2	1	1	1	1	1
ENSG00000159658.15	1	1	1	1	0	1	1	1	2	1	1
ENSG00000187048.14	1	2	2	0	0	0	0	0	0	0	0
ENSG00000186377.8	1	0	1	0	0	0	0	0	0	0	0
ENSG00000162365.13	2	2	2	0	0	0	0	0	0	0	0
ENSG00000162366.8	0	0	1	0	0	0	0	0	1	0	0
ENSG00000162367.12	0	0	0	0	1	1	0	0	0	0	0
ENSG00000123473.17	0	0	0	0	0	0	0	1	1	1	0
ENSG00000162368.14	1	1	1	1	1	1	1	1	1	1	1
ENSG00000186790.6	0	0	0	1	1	1	0	0	0	0	0
ENSG00000186564.6	0	0	0	1	1	0	0	0	0	0	1
ENSG00000269113.4	1	0	1	1	1	1	0	0	0	0	0
ENSG00000117834.13	0	0	1	0	0	0	1	1	1	1	1
ENSG00000132122.12	0	0	1	0	1	1	0	0	0	0	0
ENSG00000186094.18	0	0	1	0	0	0	0	0	0	0	0
ENSG00000185104.21	0	1	1	1	1	0	1	1	1	1	1
ENSG00000123080.12	1	1	1	1	1	1	1	1	2	1	1
ENSG00000123091.5	1	1	1	1	1	1	1	1	1	1	1
ENSG00000085831.16	0	0	0	1	1	2	1	1	0	0	1
ENSG00000085832.17	1	1	1	1	1	1	1	1	1	1	1
ENSG00000117859.19	1	1	2	3	2	3	2	4	1	2	2
ENSG00000078618.23	1	2	1	1	1	1	1	1	1	1	0
ENSG00000169213.7	0	0	0	1	1	1	1	1	0	1	1
ENSG00000117862.13	1	1	1	1	1	1	1	1	1	1	1
ENSG00000198841.4	1	1	0	1	1	1	1	1	1	1	1
ENSG00000134717.18	3	2	2	3	3	2	1	3	3	2	2
ENSG00000157077.16	1	1	1	1	1	1	1	1	1	1	1
ENSG00000154222.15	0	1	1	1	2	1	1	1	1	1	0
ENSG00000085840.13	0	0	0	1	1	1	1	1	1	0	0
ENSG00000134748.13	0	1	1	1	1	1	1	1	1	1	1
ENSG00000134744.14	1	1	1	0	1	0	1	2	1	1	1
ENSG00000116157.6	0	0	0	1	1	1	1	1	1	1	1
ENSG00000182183.15	0	0	0	1	0	0	0	0	0	0	0
ENSG00000162377.6	1	1	1	1	1	1	1	1	1	1	1
ENSG00000162378.13	1	1	1	1	1	1	0	1	1	1	1
ENSG00000203995.10	0	0	0	0	1	0	0	0	0	0	0
ENSG00000121310.17	2	3	2	1	1	0	1	1	2	0	1
ENSG00000116171.19	2	2	2	2	2	2	2	2	2	2	3
ENSG00000174348.14	1	1	1	1	1	1	0	0	0	0	1
ENSG00000157184.7	1	0	2	1	1	1	0	0	0	0	1
ENSG00000162384.14	1	1	1	1	1	1	1	1	1	1	1
ENSG00000162385.11	1	1	1	1	1	1	1	1	1	1	1
ENSG00000157193.18	0	1	0	1	2	1	2	2	1	2	2
ENSG00000058804.12	1	1	1	1	1	1	1	1	1	1	1
ENSG00000058799.15	1	1	1	1	1	1	0	1	1	1	1
ENSG00000211452.12	2	2	1	0	0	0	1	1	1	1	1
ENSG00000081870.12	1	2	1	1	1	2	2	1	1	2	1
ENSG00000116212.15	1	1	1	1	1	1	1	2	1	1	1
ENSG00000203985.11	0	0	0	0	0	0	1	1	1	1	1
ENSG00000116209.12	2	2	2	2	3	4	3	3	3	3	3
ENSG00000116205.14	1	1	1	0	1	1	1	1	1	1	1
ENSG00000215883.11	0	0	0	2	1	0	0	0	0	0	0
ENSG00000116221.15	1	1	1	1	2	3	2	2	2	2	2
ENSG00000157216.16	0	0	1	2	1	1	1	1	1	2	1
ENSG00000162390.18	1	0	0	0	0	1	0	0	0	0	0
ENSG00000162391.12	1	1	1	1	1	1	1	0	0	0	0
ENSG00000243725.7	0	0	0	0	1	1	0	1	0	0	0
ENSG00000162396.6	1	0	1	1	1	1	1	0	1	1	1
ENSG00000006555.11	0	0	1	1	1	0	0	0	0	0	0
ENSG00000116133.13	1	1	1	1	1	1	1	1	1	1	1
ENSG00000169174.11	1	1	1	1	1	1	2	1	2	2	1
ENSG00000162402.14	1	1	2	1	1	1	1	1	1	1	1
ENSG00000162407.9	1	1	1	1	1	1	1	1	1	1	1
ENSG00000162409.12	1	0	0	1	1	1	1	1	1	1	1
ENSG00000187889.13	0	0	0	0	1	0	0	0	0	0	0
ENSG00000157131.12	1	1	1	1	0	0	1	0	1	1	1
ENSG00000021852.14	2	1	2	0	0	0	1	0	1	1	1
ENSG00000173406.16	1	1	1	2	1	1	0	0	0	0	0
ENSG00000162600.12	1	1	1	1	1	1	1	1	1	1	1
ENSG00000162601.11	1	1	0	1	1	1	1	1	1	1	1
ENSG00000177606.8	1	1	1	1	1	1	1	1	1	1	1
ENSG00000172456.18	2	2	1	1	1	0	1	1	1	2	2
ENSG00000134709.13	1	1	1	1	1	1	1	1	1	1	1
ENSG00000134716.11	1	1	1	1	1	0	1	1	0	0	1
ENSG00000162599.17	2	2	1	1	0	1	1	2	1	1	1
ENSG00000162604.12	1	1	1	2	1	1	1	1	1	1	1
ENSG00000132849.22	1	1	0	0	1	1	1	0	0	2	2
ENSG00000132854.19	0	0	1	0	1	1	1	1	1	1	0
ENSG00000162607.13	1	1	1	1	1	1	1	1	1	1	1
ENSG00000116641.18	0	1	0	1	1	2	1	2	2	1	2
ENSG00000132855.5	1	1	1	1	1	1	0	0	0	0	0
ENSG00000125703.15	1	1	1	1	1	1	1	1	1	1	1
ENSG00000088035.18	1	1	1	0	0	0	0	0	1	0	0
ENSG00000142856.17	1	1	1	1	1	1	1	1	1	1	1
ENSG00000203965.13	0	0	0	1	1	0	1	1	1	1	1
ENSG00000079739.17	2	1	1	1	1	1	1	1	1	1	1
ENSG00000185483.13	0	0	0	1	1	0	0	0	0	1	0
ENSG00000162437.15	0	0	0	1	1	0	1	1	1	1	1
ENSG00000162434.13	2	2	2	2	2	3	2	1	2	2	1
ENSG00000162433.15	1	1	1	1	1	1	1	1	1	1	1
ENSG00000116675.16	0	0	0	2	1	0	1	0	1	0	0
ENSG00000213625.9	1	1	1	1	1	1	1	1	1	1	1
ENSG00000116678.20	3	4	3	2	1	2	0	0	0	0	1
ENSG00000184588.18	1	1	1	1	1	1	0	0	0	0	0
ENSG00000152760.10	1	1	1	0	0	0	0	0	0	0	0
ENSG00000152763.17	0	0	0	1	1	0	0	0	0	0	0
ENSG00000198160.15	2	1	3	1	2	2	1	1	1	1	2
ENSG00000116704.8	1	1	1	1	1	1	1	1	1	1	1
ENSG00000081985.14	0	1	0	0	0	0	0	0	0	0	0
ENSG00000142864.15	2	2	2	2	3	2	3	3	3	3	3
ENSG00000116717.13	2	1	2	1	1	2	1	1	1	1	1
ENSG00000172380.6	1	1	1	1	1	1	1	1	0	0	0
ENSG00000162595.8	1	1	1	0	0	0	0	0	0	0	0
ENSG00000116729.14	2	0	2	2	1	1	0	0	0	0	0
ENSG00000024526.17	0	0	0	1	2	1	1	1	1	1	1
ENSG00000033122.21	0	0	0	0	0	0	1	0	0	0	0
ENSG00000066557.6	1	1	1	1	1	1	1	1	1	1	1
ENSG00000116754.14	1	1	1	1	1	1	2	1	1	1	1
ENSG00000118454.13	1	1	1	1	1	1	2	2	1	1	1
ENSG00000116761.12	1	1	1	1	1	1	1	1	1	1	1
ENSG00000132485.14	1	1	0	1	1	2	1	1	1	1	1
ENSG00000172260.15	0	1	0	0	2	0	0	0	0	0	1
ENSG00000162620.16	0	0	0	0	0	0	0	0	1	0	0
ENSG00000259030.8	0	1	0	0	0	0	0	0	0	0	0
ENSG00000254685.8	1	1	1	1	1	1	1	0	1	1	1
ENSG00000116791.14	2	1	2	1	2	2	1	1	1	1	1
ENSG00000162623.16	1	2	1	1	1	2	2	2	2	2	2
ENSG00000137968.17	1	0	0	0	1	1	1	0	1	0	1
ENSG00000117054.15	3	3	1	2	1	1	2	1	2	1	2
ENSG00000137955.16	1	1	1	1	1	1	1	1	1	1	1
ENSG00000184005.11	0	1	0	0	0	0	0	0	0	0	0
ENSG00000142892.15	1	1	1	1	1	1	1	1	1	1	1
ENSG00000154027.19	0	0	1	0	1	1	0	0	0	0	0
ENSG00000036549.13	0	0	0	0	0	0	1	1	1	1	1
ENSG00000077254.14	2	1	1	1	1	2	1	1	1	1	1
ENSG00000180488.16	1	1	1	1	1	1	1	1	1	1	1
ENSG00000162614.19	1	0	0	1	1	1	0	0	0	0	0
ENSG00000162613.17	2	1	1	2	2	2	2	2	2	2	2
ENSG00000162616.9	1	1	1	1	1	1	1	1	1	1	1
ENSG00000137960.6	1	1	1	1	1	1	1	1	1	1	1
ENSG00000122420.10	0	1	0	0	0	0	0	0	0	0	0
ENSG00000137959.17	1	1	0	0	0	0	0	0	0	0	0
ENSG00000137965.11	1	1	1	0	0	0	0	0	0	0	0
ENSG00000162618.15	1	0	0	0	0	0	0	0	0	0	0
ENSG00000117114.21	2	3	2	4	4	4	2	3	2	3	2
ENSG00000142875.20	1	1	2	2	1	2	1	1	2	1	1
ENSG00000203943.9	0	0	1	0	1	1	0	0	0	0	0
ENSG00000137976.8	0	1	0	0	0	0	0	0	0	0	0
ENSG00000117133.11	1	1	1	1	1	1	1	1	1	1	1
ENSG00000174021.12	1	1	1	1	1	1	1	2	2	2	2
ENSG00000117151.13	1	1	1	1	0	1	0	1	0	0	0
ENSG00000117155.17	1	1	1	1	1	1	1	1	1	1	1
ENSG00000171517.6	0	0	0	1	1	1	0	0	0	0	0
ENSG00000153898.13	0	1	0	0	0	0	0	0	0	0	0
ENSG00000055732.13	0	0	0	1	1	0	0	0	0	0	0
ENSG00000097096.10	0	0	0	0	1	1	1	1	0	1	0
ENSG00000162642.14	1	1	1	0	0	1	1	1	1	1	1
ENSG00000142867.14	1	0	1	1	1	1	1	1	1	1	1
ENSG00000153904.21	1	1	1	1	1	1	1	1	1	1	1
ENSG00000142871.18	1	1	1	1	1	0	1	0	0	0	0
ENSG00000117174.11	1	0	1	1	1	1	1	1	1	1	1
ENSG00000171502.15	0	0	0	0	0	1	1	0	0	0	0
ENSG00000122417.16	2	1	1	1	0	0	1	1	1	1	0
ENSG00000097033.14	1	1	1	2	2	2	2	2	2	2	2
ENSG00000183291.18	2	1	2	2	2	2	2	2	2	2	2
ENSG00000153936.18	0	2	0	1	1	0	1	2	1	2	0
ENSG00000267561.2	0	0	0	0	1	0	0	0	0	0	0
ENSG00000143013.13	2	1	2	2	2	1	1	1	1	1	1
ENSG00000065243.20	1	1	1	1	1	1	1	1	1	1	1
ENSG00000137947.12	1	1	1	1	1	1	1	1	1	1	1
ENSG00000137944.18	1	1	1	1	1	1	1	1	1	1	1
ENSG00000213516.10	1	1	1	1	1	1	1	1	1	1	0
ENSG00000117226.12	0	1	0	0	0	0	0	1	0	0	0
ENSG00000117228.11	1	1	1	1	0	1	1	1	0	0	0
ENSG00000162645.13	0	0	0	0	0	0	0	0	0	1	1
ENSG00000213512.3	1	1	1	0	0	0	0	0	0	0	0
ENSG00000162654.9	0	0	1	0	0	0	0	0	0	0	0
ENSG00000154451.15	0	1	0	0	0	0	1	1	1	0	0
ENSG00000197147.15	1	0	1	1	1	1	1	1	1	1	1
ENSG00000171488.15	0	0	0	1	1	1	0	0	0	1	0
ENSG00000171492.14	1	1	1	2	1	1	1	1	1	2	1
ENSG00000162664.17	2	2	2	2	2	2	2	2	2	2	2
ENSG00000122482.22	1	1	1	2	2	2	1	1	1	2	1
ENSG00000162669.16	0	0	0	1	0	0	0	0	0	0	0
ENSG00000097046.13	0	0	0	1	1	1	1	1	0	0	0
ENSG00000069702.11	1	1	1	1	1	1	1	1	1	1	1
ENSG00000137948.19	0	0	0	2	1	1	0	0	0	0	0
ENSG00000172031.7	0	0	0	1	1	1	0	0	0	0	0
ENSG00000189195.15	0	1	0	0	1	0	0	0	1	1	1
ENSG00000174842.17	0	0	0	0	0	0	0	1	0	0	0
ENSG00000122484.9	1	1	1	1	1	1	1	1	1	1	1
ENSG00000162676.13	0	1	0	1	0	1	1	2	1	1	1
ENSG00000067208.16	1	1	1	1	1	1	1	0	0	1	1
ENSG00000122406.14	1	1	1	1	1	1	1	1	2	1	1
ENSG00000154511.12	1	1	1	1	1	1	1	1	1	1	1
ENSG00000143033.18	1	1	1	1	1	1	1	1	1	1	1
ENSG00000117500.13	1	2	1	1	1	1	1	1	1	1	1
ENSG00000122483.18	0	0	0	1	0	1	0	0	0	1	0
ENSG00000117505.13	1	2	2	2	2	2	2	2	2	2	2
ENSG00000137942.18	1	1	2	2	1	2	1	1	1	1	1
ENSG00000137936.18	1	1	1	2	1	1	1	1	1	1	1
ENSG00000067334.14	0	0	1	1	1	1	1	1	1	0	0
ENSG00000023909.10	1	1	1	1	1	1	1	1	2	2	2
ENSG00000198691.14	0	0	0	1	0	0	1	0	0	0	0
ENSG00000137962.13	1	2	1	1	1	1	1	1	1	0	1
ENSG00000117528.14	1	1	1	2	2	1	1	1	2	2	1
ENSG00000117525.14	0	0	1	1	1	1	0	0	1	0	0
ENSG00000143036.17	1	1	0	1	1	1	1	1	1	1	1
ENSG00000117519.16	1	1	1	1	2	1	2	1	2	1	1
ENSG00000172339.10	1	1	1	1	1	1	1	1	1	1	1
ENSG00000152078.10	1	1	1	1	1	1	1	1	1	1	1
ENSG00000271092.5	0	0	0	0	0	1	0	0	0	0	0
ENSG00000122481.17	0	1	0	1	1	1	1	1	1	1	1
ENSG00000117569.19	2	0	0	0	2	2	2	1	0	2	2
ENSG00000188641.14	2	2	2	1	2	2	1	1	2	1	1
ENSG00000162627.17	0	0	0	2	1	2	1	1	1	1	1
ENSG00000099260.12	1	1	1	1	2	1	1	1	1	1	1
ENSG00000156869.14	1	1	1	1	1	1	1	1	1	1	1
ENSG00000162688.17	1	0	2	2	2	2	1	1	1	0	0
ENSG00000117620.15	3	3	4	3	2	2	2	3	2	4	3
ENSG00000156875.14	1	1	1	1	1	1	1	1	1	1	1
ENSG00000156876.10	0	1	0	1	1	1	1	1	1	1	1
ENSG00000122435.11	1	1	1	1	1	1	1	1	1	1	1
ENSG00000137992.15	1	1	1	1	1	1	1	1	1	1	1
ENSG00000137996.13	1	1	2	2	2	2	2	2	2	2	2
ENSG00000079335.20	0	0	0	1	1	1	0	0	1	1	1
ENSG00000181656.7	1	1	0	0	0	0	0	0	0	0	0
ENSG00000162692.12	0	1	1	0	0	0	0	0	0	0	0
ENSG00000162694.14	1	0	1	1	1	1	1	1	1	1	1
ENSG00000162695.12	1	1	1	1	1	1	1	1	1	1	1
ENSG00000117543.22	1	1	1	1	1	1	1	2	2	2	2
ENSG00000170989.10	1	1	1	0	0	0	0	0	0	0	0
ENSG00000118733.17	0	0	0	1	1	1	0	0	0	0	0
ENSG00000185946.16	1	1	1	1	1	1	1	1	1	1	1
ENSG00000240038.7	1	1	1	0	0	0	0	0	0	0	0
ENSG00000243480.8	1	0	1	0	0	0	0	0	0	0	0
ENSG00000187733.7	0	0	0	0	0	1	0	0	0	0	0
ENSG00000198890.9	0	1	1	0	0	0	1	1	1	1	1
ENSG00000134215.16	0	0	0	1	1	1	1	1	1	1	0
ENSG00000085491.17	0	0	0	0	0	0	1	0	1	0	0
ENSG00000196427.14	0	0	1	0	0	0	0	0	0	0	0
ENSG00000186086.19	0	1	0	0	0	0	0	0	0	0	0
ENSG00000162636.16	1	1	0	1	0	1	1	1	0	0	0
ENSG00000134186.12	1	1	1	1	2	1	1	1	2	1	1
ENSG00000116266.11	1	1	1	1	1	1	1	1	1	1	1
ENSG00000121957.15	0	1	0	2	2	2	3	1	4	1	0
ENSG00000121940.17	2	4	5	12	10	7	9	6	5	4	5
ENSG00000085433.17	1	0	1	1	1	1	0	1	1	0	0
ENSG00000197780.11	1	1	1	1	1	1	1	1	1	1	1
ENSG00000215717.7	1	1	1	1	1	1	1	1	1	1	1
ENSG00000116299.17	0	0	0	0	0	0	0	1	0	0	0
ENSG00000031698.13	1	1	1	1	1	1	1	1	1	1	1
ENSG00000143126.8	0	0	0	1	1	1	1	1	1	1	0
ENSG00000134222.16	0	0	0	1	1	1	1	1	1	1	1
ENSG00000221986.7	0	0	0	0	0	0	0	1	0	0	1
ENSG00000134243.12	1	1	1	1	1	1	1	1	1	1	1
ENSG00000143106.13	1	1	1	1	1	1	1	1	1	1	1
ENSG00000143028.9	1	0	1	0	0	0	1	1	0	1	0
ENSG00000162650.17	0	1	0	0	0	0	1	0	0	0	0
ENSG00000174151.15	1	1	1	1	1	1	1	1	1	1	1
ENSG00000181754.7	0	1	0	0	0	0	0	0	0	1	1
ENSG00000065135.12	1	1	1	1	1	1	1	1	1	1	1
ENSG00000134183.13	0	1	0	0	0	0	0	0	0	0	0
ENSG00000116337.20	1	1	1	2	2	1	2	1	3	1	2
ENSG00000168765.18	1	0	1	1	2	1	2	3	2	3	2
ENSG00000213366.13	0	0	0	1	0	1	1	1	1	1	0
ENSG00000134184.13	0	0	0	1	1	1	0	0	0	0	0
ENSG00000134201.12	1	0	0	0	0	0	0	0	0	0	0
ENSG00000134202.12	0	1	0	1	1	1	1	1	1	1	1
ENSG00000198758.11	0	0	0	1	1	1	1	1	1	1	1
ENSG00000184371.14	1	1	1	2	2	1	1	1	1	1	1
ENSG00000168710.18	1	1	1	1	1	1	1	1	1	1	1
ENSG00000143093.15	1	1	1	1	1	1	1	1	1	1	1
ENSG00000116396.15	0	0	0	2	1	1	0	0	1	2	2
ENSG00000162775.17	1	0	0	1	1	1	1	0	1	1	0
ENSG00000168679.18	0	2	1	0	1	0	0	0	0	0	0
ENSG00000134248.14	3	2	1	1	2	1	3	1	3	2	1
ENSG00000143119.14	0	1	1	0	0	0	0	0	0	0	0
ENSG00000121931.16	1	1	1	2	1	1	2	1	2	1	1
ENSG00000156171.15	1	1	1	1	1	1	1	1	1	1	1
ENSG00000162777.17	0	1	1	0	0	0	0	0	0	0	0
ENSG00000085465.13	1	1	1	1	1	1	0	1	1	1	1
ENSG00000116455.14	1	1	1	1	1	1	1	1	1	1	1
ENSG00000116459.11	1	1	1	1	1	1	1	1	1	1	1
ENSG00000143110.12	0	1	0	0	0	0	0	0	0	0	0
ENSG00000116473.15	2	1	2	2	2	2	1	2	1	2	1
ENSG00000197852.12	0	0	0	1	1	2	1	1	1	1	0
ENSG00000064703.13	0	0	0	1	1	1	1	0	1	1	1
ENSG00000171385.10	1	1	1	0	0	0	0	0	0	0	0
ENSG00000143079.15	0	1	1	1	1	1	1	0	1	1	1
ENSG00000134245.18	0	0	0	0	0	2	0	2	0	0	1
ENSG00000007341.19	0	0	0	0	1	1	1	1	1	1	1
ENSG00000116489.13	1	1	1	1	1	1	1	1	1	1	1
ENSG00000155363.19	1	1	1	2	2	1	1	1	1	1	1
ENSG00000155366.17	1	1	1	1	2	1	2	1	2	2	1
ENSG00000155367.16	0	0	0	1	0	1	0	0	0	0	0
ENSG00000155380.13	1	1	1	1	1	1	1	1	1	1	1
ENSG00000198799.12	0	0	1	1	1	1	1	1	1	1	1
ENSG00000081026.19	0	1	1	1	1	1	0	0	1	1	1
ENSG00000116793.16	0	1	0	1	0	2	1	1	2	1	1
ENSG00000081019.14	1	1	1	1	1	1	0	1	0	1	0
ENSG00000134262.13	0	0	0	0	1	0	1	1	1	1	1
ENSG00000118655.7	0	0	0	0	0	1	1	1	1	0	0
ENSG00000163349.22	1	1	1	1	1	1	1	1	1	1	1
ENSG00000116774.12	1	1	1	1	1	1	1	1	1	0	1
ENSG00000197323.12	1	1	1	1	1	1	1	1	1	1	1
ENSG00000116752.6	1	1	1	1	1	1	1	1	1	1	1
ENSG00000213281.5	1	1	1	1	1	1	1	1	1	1	1
ENSG00000009307.17	2	5	7	7	8	12	10	9	9	5	7
ENSG00000052723.12	1	1	1	1	1	1	1	1	1	1	1
ENSG00000134198.10	0	0	1	0	0	1	0	0	0	0	0
ENSG00000134259.6	0	0	1	0	0	0	0	0	0	0	0
ENSG00000173218.15	1	0	2	2	2	2	2	2	2	3	2
ENSG00000163393.13	0	0	0	1	0	0	1	1	0	1	1
ENSG00000173212.5	1	0	1	1	2	1	2	1	1	1	1
ENSG00000163399.16	1	1	1	2	2	2	2	2	2	2	3
ENSG00000116815.16	1	1	0	1	1	1	1	2	1	1	1
ENSG00000143061.18	0	0	0	1	1	1	1	0	0	0	1
ENSG00000116824.5	1	0	0	0	0	0	0	0	0	0	0
ENSG00000134247.10	1	1	1	1	1	1	1	1	1	1	1
ENSG00000116830.12	0	0	1	1	0	1	1	1	1	1	1
ENSG00000134253.10	0	0	0	0	0	0	0	0	1	0	0
ENSG00000198162.12	1	1	1	1	1	1	1	2	1	1	1
ENSG00000183508.5	1	0	1	1	1	0	0	0	0	0	0
ENSG00000196505.11	1	1	1	1	2	2	1	2	1	1	2
ENSG00000065183.16	1	1	1	1	1	1	1	1	1	1	1
ENSG00000092607.15	1	1	1	0	0	1	0	1	0	1	1
ENSG00000116874.12	1	1	1	1	1	1	1	1	1	1	1
ENSG00000116882.15	2	1	2	0	0	1	0	0	0	0	0
ENSG00000203857.10	0	0	0	1	1	1	0	0	0	0	0
ENSG00000143067.5	1	1	1	1	1	1	1	1	1	1	1
ENSG00000092621.13	2	1	2	1	1	1	1	2	1	2	2
ENSG00000134240.12	2	2	2	1	1	1	0	0	0	0	0
ENSG00000134193.15	0	0	0	0	1	0	0	0	0	0	0
ENSG00000134250.21	1	1	1	1	1	1	0	1	1	1	1
ENSG00000265808.4	2	1	1	1	1	1	1	2	1	1	1
ENSG00000286106.2	0	0	0	0	0	1	0	0	0	0	0
ENSG00000198019.13	0	0	1	0	0	0	0	0	0	0	0
ENSG00000171943.12	1	1	0	0	0	0	0	0	0	1	0
ENSG00000273213.4	0	1	0	0	0	0	0	0	0	0	0
ENSG00000266338.7	1	1	1	1	1	0	0	0	1	1	0
ENSG00000196369.12	0	0	1	1	0	1	1	1	1	0	1
ENSG00000215784.6	0	0	0	0	0	1	0	0	0	0	0
ENSG00000162825.17	1	1	1	1	1	1	1	1	1	1	1
ENSG00000117262.19	1	1	0	0	1	1	1	0	0	0	1
ENSG00000174827.14	1	1	1	2	2	1	1	1	1	1	1
ENSG00000265491.5	1	1	1	1	1	1	1	1	1	1	1
ENSG00000186141.9	1	1	1	1	1	1	1	1	1	1	1
ENSG00000186364.12	0	0	0	1	1	1	0	1	0	0	0
ENSG00000131788.16	0	0	0	0	0	0	1	2	1	1	0
ENSG00000198483.13	0	1	1	0	0	0	0	0	0	0	0
ENSG00000143127.13	0	0	0	0	0	0	1	1	0	1	1
ENSG00000131779.11	1	1	1	1	1	1	1	1	1	1	1
ENSG00000265241.8	2	2	3	2	2	2	2	2	2	2	2
ENSG00000271601.4	1	1	1	1	0	1	1	1	1	1	1
ENSG00000121851.13	1	1	1	1	1	1	1	1	1	1	1
ENSG00000265972.6	1	1	1	1	1	1	1	1	1	1	1
ENSG00000168509.20	2	2	2	1	1	0	0	0	0	0	0
ENSG00000271425.9	1	1	1	1	1	1	2	1	1	1	1
ENSG00000264343.7	2	2	0	1	3	1	0	0	1	0	1
ENSG00000268043.8	0	0	0	0	0	0	1	0	1	0	1
ENSG00000131791.8	1	1	1	1	1	1	1	1	1	1	1
ENSG00000131781.13	2	2	3	0	2	1	2	2	2	3	2
ENSG00000131778.20	0	2	1	2	1	1	2	1	1	1	1
ENSG00000116128.12	0	0	1	1	1	0	1	1	1	1	1
ENSG00000162836.12	0	0	0	0	0	0	1	1	0	0	1
ENSG00000188092.15	1	0	0	1	1	0	0	0	0	0	0
ENSG00000263956.8	1	1	1	1	0	1	0	0	0	1	0
ENSG00000236334.3	0	0	0	0	1	0	0	1	0	0	0
ENSG00000270629.7	2	0	2	2	2	2	2	2	2	2	2
ENSG00000286019.1	0	0	1	0	0	0	0	1	0	1	0
ENSG00000177144.8	0	0	0	1	1	0	1	1	1	1	1
ENSG00000178104.20	1	3	5	3	2	2	2	1	3	0	3
ENSG00000269713.8	2	2	1	1	2	2	2	2	1	1	1
ENSG00000286219.2	1	1	1	1	1	1	0	1	0	0	1
ENSG00000286185.1	1	1	1	1	1	1	1	0	1	1	1
ENSG00000271383.8	1	1	1	1	1	1	1	0	0	1	1
ENSG00000288825.1	1	1	1	0	1	1	1	1	1	1	1
ENSG00000288859.1	0	0	0	1	0	0	0	0	0	0	0
ENSG00000184678.11	1	1	0	1	1	1	1	0	1	1	1
ENSG00000184260.6	0	0	1	1	1	1	1	1	1	0	0
ENSG00000178096.9	0	1	0	0	1	0	1	0	1	0	1
ENSG00000159164.10	0	0	0	0	1	2	0	0	1	1	0
ENSG00000143368.10	1	1	1	1	1	1	1	1	1	1	1
ENSG00000014914.21	0	0	0	0	0	1	1	0	0	0	0
ENSG00000264522.6	1	1	1	1	1	1	1	1	1	1	1
ENSG00000136631.15	1	1	1	1	1	1	2	1	1	1	1
ENSG00000023902.14	1	1	1	2	1	1	1	1	1	1	1
ENSG00000143401.15	1	1	1	2	1	1	1	1	1	1	1
ENSG00000118298.12	1	1	1	0	0	0	0	0	1	1	0
ENSG00000117362.13	1	1	2	2	1	2	1	1	1	1	1
ENSG00000118292.9	1	1	1	0	0	1	1	0	0	0	0
ENSG00000159208.16	1	0	0	0	0	0	0	0	0	0	0
ENSG00000266472.6	2	2	2	2	2	2	2	2	2	1	2
ENSG00000117360.13	0	0	0	1	1	1	1	1	1	1	1
ENSG00000163125.16	1	1	1	1	1	1	1	1	1	1	1
ENSG00000143374.18	0	1	1	0	1	0	1	1	1	0	1
ENSG00000143369.15	1	1	1	0	0	1	0	1	0	0	1
ENSG00000143382.16	0	0	1	1	1	1	1	1	1	1	1
ENSG00000143384.14	1	1	1	2	1	2	1	2	1	1	1
ENSG00000143420.19	2	2	3	3	3	3	3	2	3	3	2
ENSG00000143457.11	1	0	1	1	1	1	1	1	1	0	1
ENSG00000163131.12	1	1	1	1	1	2	0	0	0	0	0
ENSG00000143387.14	1	0	0	0	1	0	0	0	0	0	0
ENSG00000143437.21	1	1	0	1	1	1	1	1	1	1	1
ENSG00000143379.13	1	0	1	0	1	1	0	1	1	2	1
ENSG00000143418.20	1	2	1	1	2	1	1	1	0	0	1
ENSG00000143412.10	1	1	1	1	1	1	1	1	1	1	1
ENSG00000143409.17	1	0	1	1	0	1	1	0	1	1	0
ENSG00000143363.17	1	1	1	1	1	1	1	1	1	1	1
ENSG00000163141.20	0	1	0	1	0	1	0	0	0	0	0
ENSG00000143443.10	1	0	1	0	1	1	1	1	1	1	1
ENSG00000197622.13	1	1	1	1	1	1	1	1	1	1	1
ENSG00000213190.4	0	1	0	1	1	1	0	0	0	0	0
ENSG00000143458.12	1	1	1	0	0	0	0	0	0	0	0
ENSG00000143434.17	0	0	1	0	0	1	0	0	1	0	1
ENSG00000163154.6	1	0	0	0	0	0	0	0	0	0	0
ENSG00000163156.12	0	1	1	2	1	1	1	1	2	1	1
ENSG00000163155.12	1	1	1	0	1	0	1	1	1	0	1
ENSG00000163159.15	1	1	1	1	1	1	1	1	1	1	1
ENSG00000143398.20	1	1	1	1	1	1	1	1	1	1	1
ENSG00000159352.16	3	1	2	1	1	2	1	1	1	1	1
ENSG00000143373.18	1	1	1	1	1	1	0	0	0	1	0
ENSG00000143393.17	1	1	2	2	1	2	1	1	1	1	1
ENSG00000143390.18	1	1	1	1	1	1	1	1	1	1	1
ENSG00000143416.21	1	2	2	1	1	0	0	1	0	1	1
ENSG00000159377.11	1	1	1	1	1	1	1	1	1	1	1
ENSG00000143442.22	1	1	1	1	0	1	1	2	1	1	1
ENSG00000143375.15	0	1	0	0	1	1	0	0	0	0	0
ENSG00000143367.17	0	1	1	1	1	1	1	1	1	1	1
ENSG00000143376.14	1	1	1	1	1	1	1	0	1	0	0
ENSG00000143436.11	1	1	1	1	1	1	1	1	1	1	1
ENSG00000143450.19	0	0	1	1	1	1	0	0	1	1	0
ENSG00000182134.17	0	1	0	1	1	1	1	0	1	1	0
ENSG00000143365.19	1	1	1	0	0	0	1	0	1	1	1
ENSG00000159445.13	1	1	2	2	1	2	2	1	1	1	1
ENSG00000197747.9	1	1	1	2	2	2	2	2	2	2	1
ENSG00000163191.6	0	1	0	1	1	1	1	1	0	0	1
ENSG00000163220.11	1	1	1	1	1	1	1	1	0	0	0
ENSG00000163221.9	0	1	1	0	0	0	0	0	0	0	0
ENSG00000143546.10	1	1	1	0	0	0	0	0	0	0	0
ENSG00000197956.10	1	1	1	2	2	3	2	2	2	2	2
ENSG00000196154.12	1	1	1	1	1	1	1	1	1	1	1
ENSG00000188015.10	0	0	0	0	0	1	1	1	0	0	1
ENSG00000196754.13	0	0	0	0	0	0	1	1	0	1	0
ENSG00000188643.11	1	1	1	1	1	1	2	2	2	1	1
ENSG00000189334.9	0	1	1	1	0	1	1	1	0	1	0
ENSG00000189171.15	1	1	1	2	1	2	2	2	1	1	2
ENSG00000160678.12	0	0	1	0	0	1	2	1	2	1	2
ENSG00000160679.13	1	1	1	1	1	2	1	1	1	1	1
ENSG00000143553.11	0	1	0	1	1	0	0	1	0	0	0
ENSG00000143621.17	1	1	1	1	1	1	1	1	1	1	1
ENSG00000143624.14	0	0	0	1	0	0	1	1	0	1	1
ENSG00000143554.14	0	2	1	1	0	1	0	0	0	0	0
ENSG00000143614.10	1	0	1	1	1	1	0	1	0	1	1
ENSG00000198837.10	0	0	0	1	1	0	0	1	1	1	1
ENSG00000160741.17	1	0	0	1	1	1	0	0	0	1	0
ENSG00000143570.19	1	1	1	2	2	2	2	2	2	2	3
ENSG00000143578.16	1	1	1	1	1	1	1	1	1	1	0
ENSG00000143543.15	1	1	2	2	2	2	2	2	1	2	2
ENSG00000143545.10	1	1	1	1	1	1	1	1	1	1	1
ENSG00000177954.14	1	1	1	1	1	1	1	1	1	1	1
ENSG00000143549.21	1	1	1	3	2	3	1	3	1	2	1
ENSG00000143612.21	1	3	1	3	2	2	2	2	2	3	3
ENSG00000143569.19	2	2	2	3	3	3	3	3	3	2	3
ENSG00000143575.15	1	1	1	1	1	1	1	1	1	1	1
ENSG00000143595.13	0	0	0	0	1	1	0	0	0	0	0
ENSG00000143515.20	1	1	0	2	1	1	1	1	1	1	1
ENSG00000160712.13	1	1	1	1	1	1	1	1	1	1	1
ENSG00000169291.10	0	0	1	0	1	1	0	0	0	0	0
ENSG00000160714.10	1	1	1	1	1	1	1	1	1	1	1
ENSG00000160710.18	3	6	4	2	4	5	4	3	4	3	4
ENSG00000143603.19	0	0	0	3	0	0	0	0	0	0	0
ENSG00000163344.6	1	1	1	1	1	1	1	1	1	1	1
ENSG00000163346.17	1	1	1	1	1	1	1	1	1	1	1
ENSG00000163348.4	1	1	1	1	1	1	1	1	1	1	1
ENSG00000160691.19	1	1	1	1	1	1	2	1	2	2	2
ENSG00000173207.13	1	1	0	2	2	2	2	2	2	1	1
ENSG00000160688.19	1	1	1	4	3	3	2	3	2	1	1
ENSG00000160685.14	1	1	1	1	1	1	1	1	1	1	1
ENSG00000143537.14	1	1	1	3	1	1	2	2	1	2	2
ENSG00000243364.8	1	1	0	1	1	1	1	1	1	1	1
ENSG00000143590.14	0	0	0	1	0	1	1	1	1	1	1
ENSG00000169242.12	1	1	1	1	1	1	1	1	1	1	1
ENSG00000169241.19	0	1	0	1	1	1	1	1	1	0	1
ENSG00000179085.8	1	1	1	1	1	1	1	1	1	1	1
ENSG00000163463.13	3	2	2	3	2	2	2	2	2	2	2
ENSG00000163462.19	0	0	0	0	0	0	1	1	0	0	0
ENSG00000169231.13	1	0	1	0	0	0	0	0	0	0	0
ENSG00000173171.15	1	1	1	1	1	1	1	1	1	1	2
ENSG00000177628.16	1	1	2	1	2	2	1	1	1	1	1
ENSG00000160767.22	0	0	1	1	1	0	1	1	1	2	1
ENSG00000116521.11	0	1	0	1	1	1	1	1	1	1	1
ENSG00000176444.19	0	0	0	0	0	0	0	0	0	1	1
ENSG00000143630.10	1	1	0	1	0	0	0	0	0	1	1
ENSG00000143627.19	1	1	1	0	0	0	1	1	1	1	1
ENSG00000160752.15	2	2	2	3	3	2	3	2	3	2	2
ENSG00000160753.17	0	1	0	2	2	2	2	1	1	1	1
ENSG00000116539.14	9	6	7	8	8	9	8	5	0	9	7
ENSG00000125459.17	0	1	1	1	0	1	0	1	0	1	1
ENSG00000163374.20	2	2	2	1	2	3	1	2	3	1	1
ENSG00000132676.16	1	2	2	3	4	3	2	1	2	2	2
ENSG00000116580.20	1	1	0	1	2	1	1	1	1	2	1
ENSG00000132718.9	0	0	1	1	1	1	0	0	0	0	0
ENSG00000143622.11	1	1	1	1	1	2	1	1	1	1	1
ENSG00000132680.11	1	0	1	1	1	1	1	1	1	1	1
ENSG00000173080.6	0	0	0	0	0	0	1	0	0	0	1
ENSG00000116584.22	0	0	0	1	2	1	2	2	2	1	1
ENSG00000163479.14	2	1	1	1	1	2	1	1	1	1	1
ENSG00000160803.8	1	1	1	1	1	1	1	1	1	1	1
ENSG00000116586.12	2	2	2	1	3	2	1	1	1	1	1
ENSG00000132698.15	0	0	0	0	0	0	0	0	0	1	0
ENSG00000254726.3	1	1	1	1	1	1	1	1	1	1	1
ENSG00000160789.24	3	2	1	4	3	2	3	6	4	3	1
ENSG00000196189.14	0	0	1	0	0	0	0	0	0	0	0
ENSG00000160785.14	1	1	1	1	1	1	1	1	1	1	1
ENSG00000260238.6	0	1	0	0	1	1	1	1	1	1	1
ENSG00000160783.19	1	1	1	1	2	1	1	1	1	1	1
ENSG00000242252.2	1	0	0	0	0	0	0	0	0	0	0
ENSG00000160781.17	0	0	0	1	1	1	0	0	0	0	1
ENSG00000198952.8	1	1	1	1	1	1	1	1	1	1	1
ENSG00000198715.13	1	1	1	1	2	2	1	1	1	1	1
ENSG00000163468.15	1	1	1	1	1	1	1	1	2	1	2
ENSG00000163467.12	0	0	0	0	1	1	1	0	0	0	1
ENSG00000132677.13	0	0	1	1	1	1	1	1	1	0	0
ENSG00000116604.19	1	0	1	1	1	1	1	2	1	1	1
ENSG00000183856.11	0	0	0	1	1	1	1	1	0	0	0
ENSG00000187862.13	0	0	0	0	0	0	0	0	0	1	0
ENSG00000163382.13	1	2	1	1	2	2	2	1	2	1	1
ENSG00000160818.17	0	1	0	1	1	1	1	1	1	1	1
ENSG00000132702.13	0	0	0	1	0	0	0	0	0	0	0
ENSG00000132692.19	0	0	0	0	0	0	0	1	0	0	1
ENSG00000132688.11	0	0	0	1	1	1	1	1	1	1	1
ENSG00000143320.9	0	0	0	1	0	1	0	0	1	0	1
ENSG00000143319.17	1	1	1	2	1	1	1	1	1	1	1
ENSG00000143303.12	1	1	1	1	1	1	1	1	1	1	1
ENSG00000143314.12	2	2	2	2	2	2	2	2	2	2	2
ENSG00000143321.19	1	1	1	3	2	2	2	2	1	2	2
ENSG00000143294.15	1	1	1	2	2	2	1	1	1	1	1
ENSG00000027869.12	0	1	0	0	0	1	1	0	0	1	0
ENSG00000132694.19	0	0	0	0	0	0	0	0	1	1	1
ENSG00000117036.12	1	0	1	1	0	1	1	0	0	1	1
ENSG00000073754.6	1	1	1	0	0	0	0	0	0	0	0
ENSG00000183853.18	1	1	0	1	1	1	0	0	0	0	0
ENSG00000158473.8	1	1	1	0	0	0	0	0	0	0	0
ENSG00000158481.13	1	1	0	0	0	0	0	0	0	0	0
ENSG00000197532.3	0	0	0	0	0	1	1	0	0	0	0
ENSG00000163563.8	1	0	0	0	0	0	0	0	0	0	0
ENSG00000163564.15	0	1	0	0	0	0	0	0	0	0	0
ENSG00000163565.20	0	1	1	0	0	0	0	0	0	0	0
ENSG00000179639.11	1	0	1	0	0	0	0	0	0	0	0
ENSG00000132703.4	1	1	1	0	0	0	0	0	0	0	0
ENSG00000132693.12	1	1	1	0	0	0	0	0	0	0	0
ENSG00000158716.9	1	1	1	0	0	0	0	0	0	0	0
ENSG00000158714.11	0	1	0	0	0	0	0	0	0	0	0
ENSG00000158710.15	1	1	1	1	1	1	1	1	1	1	1
ENSG00000177807.10	0	0	0	0	0	0	0	1	1	0	1
ENSG00000143315.8	1	1	1	1	1	1	1	1	1	0	1
ENSG00000162729.14	1	1	1	1	1	1	1	1	1	1	1
ENSG00000018625.15	0	0	0	0	0	1	0	0	0	0	0
ENSG00000162734.13	1	1	1	1	2	1	1	1	1	1	1
ENSG00000132716.19	1	1	1	2	2	1	1	1	1	1	1
ENSG00000162735.19	1	0	0	0	1	1	1	0	0	0	0
ENSG00000122218.17	0	1	1	0	2	2	2	4	2	2	0
ENSG00000162736.17	1	1	1	1	1	1	1	1	1	1	1
ENSG00000171786.6	0	0	0	0	0	0	0	0	0	0	1
ENSG00000162738.7	0	0	0	0	2	0	0	0	0	0	0
ENSG00000162739.14	1	1	0	0	0	0	0	0	0	0	0
ENSG00000117091.10	1	1	1	0	0	0	0	0	0	0	0
ENSG00000026751.17	0	1	0	0	0	0	0	0	0	0	0
ENSG00000122223.13	0	1	0	0	0	0	0	0	0	0	0
ENSG00000158764.7	1	0	0	0	0	0	0	0	0	0	0
ENSG00000158769.18	1	1	1	1	1	1	1	1	1	1	1
ENSG00000215845.11	1	1	2	0	0	0	0	0	0	0	0
ENSG00000158773.14	0	0	0	1	0	0	1	1	1	1	0
ENSG00000186517.14	0	1	1	0	0	0	0	0	0	0	0
ENSG00000143217.9	0	0	0	0	0	0	1	1	1	1	0
ENSG00000143256.5	1	1	1	1	1	1	1	1	1	1	1
ENSG00000158793.14	1	1	1	1	2	1	1	1	1	1	1
ENSG00000158796.17	1	1	1	1	1	1	1	1	1	1	1
ENSG00000143222.12	1	1	1	1	1	1	1	1	1	1	1
ENSG00000143258.17	0	1	0	1	1	1	1	1	1	0	1
ENSG00000143224.18	0	1	2	0	2	1	0	0	1	0	2
ENSG00000158850.15	1	1	1	1	1	1	1	1	1	1	1
ENSG00000158859.10	0	0	0	0	0	0	1	0	1	0	0
ENSG00000158864.13	2	4	4	5	4	6	3	3	4	3	2
ENSG00000158869.11	1	1	0	0	1	1	1	1	1	1	0
ENSG00000158874.11	4	3	4	3	3	3	2	2	2	2	2
ENSG00000158882.15	0	0	0	1	0	0	0	0	1	0	1
ENSG00000143257.12	2	2	1	1	0	1	0	0	0	0	0
ENSG00000248485.2	0	0	1	0	0	0	0	0	0	0	0
ENSG00000158887.19	0	0	0	0	0	0	2	2	2	2	1
ENSG00000143252.16	1	1	1	1	1	1	1	1	1	1	1
ENSG00000173110.8	1	0	0	0	0	1	0	0	0	0	0
ENSG00000162747.12	1	1	1	0	0	0	0	0	0	0	0
ENSG00000072694.22	1	1	1	0	0	0	0	0	0	0	0
ENSG00000132185.18	0	0	0	0	0	1	0	0	0	0	0
ENSG00000162746.14	1	0	0	0	0	1	0	0	0	0	0
ENSG00000081721.12	0	1	0	1	1	1	1	1	1	1	1
ENSG00000118217.7	2	2	1	2	1	2	2	1	2	2	0
ENSG00000198929.13	0	0	0	0	0	0	1	0	1	0	0
ENSG00000239887.6	1	0	0	1	1	1	0	1	0	1	1
ENSG00000198574.6	0	1	0	0	0	0	0	0	0	0	0
ENSG00000152332.16	1	1	1	1	2	2	2	2	2	2	2
ENSG00000117143.14	1	1	1	1	1	1	1	1	1	1	1
ENSG00000162733.19	2	2	2	0	0	0	0	0	0	0	0
ENSG00000132196.16	0	1	1	1	1	1	1	1	1	1	1
ENSG00000117152.14	1	0	0	0	0	0	0	0	0	0	0
ENSG00000143248.13	1	1	1	1	1	1	1	0	1	0	0
ENSG00000143228.13	0	0	0	1	1	1	1	1	1	1	1
ENSG00000185630.19	1	0	1	0	1	1	0	0	0	0	0
ENSG00000143198.13	1	2	2	2	2	1	1	1	1	2	1
ENSG00000143149.13	1	1	1	1	1	1	1	1	1	1	1
ENSG00000143183.18	1	2	2	2	1	3	2	3	2	3	2
ENSG00000143179.16	1	2	1	1	2	1	2	1	1	1	1
ENSG00000188859.7	1	0	0	1	0	0	0	0	0	0	0
ENSG00000143157.12	1	1	1	1	1	2	1	1	1	1	1
ENSG00000152382.6	1	1	1	1	1	1	1	1	1	1	1
ENSG00000143190.23	5	5	0	4	5	5	5	5	4	5	0
ENSG00000198821.11	0	1	1	0	0	0	0	0	0	0	0
ENSG00000143162.9	1	1	1	1	1	1	1	1	1	1	1
ENSG00000198771.11	1	1	1	0	0	0	0	0	0	0	0
ENSG00000197965.12	1	2	1	3	1	2	1	1	1	1	2
ENSG00000143199.18	2	0	2	0	0	0	0	0	0	0	0
ENSG00000143158.11	1	1	1	1	1	1	1	1	1	1	1
ENSG00000143164.16	1	1	1	1	1	1	1	1	1	1	1
ENSG00000143147.15	0	0	0	1	1	1	0	0	0	0	0
ENSG00000143155.13	1	1	1	1	1	1	1	1	1	1	1
ENSG00000213064.10	1	2	1	1	1	1	1	2	1	2	1
ENSG00000143178.13	0	0	0	1	1	0	0	0	0	0	0
ENSG00000143185.4	1	1	0	1	1	0	0	0	0	0	1
ENSG00000143184.5	0	0	0	0	0	1	1	0	0	1	0
ENSG00000143196.5	1	0	1	0	0	0	0	0	0	0	0
ENSG00000143153.14	5	2	3	4	4	5	3	3	4	4	3
ENSG00000143156.14	0	0	0	1	1	1	1	1	1	1	1
ENSG00000117475.14	1	1	2	1	1	2	1	1	1	1	1
ENSG00000117479.15	1	1	1	1	1	1	1	1	1	1	1
ENSG00000198734.12	1	1	1	2	1	1	2	2	2	2	2
ENSG00000174175.17	0	1	1	0	0	0	0	0	0	0	0
ENSG00000000460.17	0	0	0	0	1	0	1	2	0	0	0
ENSG00000188404.10	0	0	1	1	0	0	0	0	0	0	0
ENSG00000007908.16	1	1	1	0	0	0	0	0	0	0	0
ENSG00000171806.12	1	1	0	1	1	1	0	1	1	1	1
ENSG00000000457.14	1	1	0	1	1	1	1	1	1	0	1
ENSG00000075945.13	1	1	1	1	1	1	1	1	1	1	1
ENSG00000120370.14	0	0	1	0	1	0	1	0	0	0	0
ENSG00000116132.12	0	0	0	0	1	0	0	0	0	0	0
ENSG00000007933.13	1	1	1	0	0	0	0	0	0	0	0
ENSG00000094963.14	1	0	0	0	0	0	0	0	0	0	0
ENSG00000076258.10	1	1	1	0	0	0	0	0	0	0	0
ENSG00000117523.18	5	5	5	5	5	5	6	5	5	5	5
ENSG00000117533.15	1	1	1	2	0	1	0	1	2	1	2
ENSG00000010165.20	1	1	0	1	1	1	1	1	1	1	1
ENSG00000197959.15	0	0	0	1	0	0	0	0	0	0	0
ENSG00000135845.10	1	1	1	1	1	1	1	1	1	1	2
ENSG00000180999.11	0	0	0	0	1	0	0	0	0	1	0
ENSG00000094975.14	1	1	1	1	1	1	1	1	1	1	1
ENSG00000117586.11	0	0	0	1	1	1	1	1	1	1	1
ENSG00000117592.9	1	1	1	1	1	1	1	1	1	1	1
ENSG00000076321.11	1	0	1	1	1	1	1	1	1	1	0
ENSG00000120334.16	0	0	0	1	1	1	1	0	1	0	0
ENSG00000117593.12	1	1	0	1	2	1	1	1	1	1	1
ENSG00000185278.16	1	1	1	0	1	0	0	0	0	2	1
ENSG00000117601.15	1	1	1	1	1	1	1	1	1	1	1
ENSG00000135870.12	2	2	2	2	2	2	2	0	2	2	0
ENSG00000152061.24	0	3	1	0	1	2	1	3	3	1	1
ENSG00000116161.18	1	1	1	1	1	1	1	1	1	1	1
ENSG00000120333.4	1	0	1	1	0	1	1	1	0	1	1
ENSG00000120332.17	1	0	0	0	0	0	0	0	0	0	0
ENSG00000235750.10	1	1	0	0	0	0	0	1	0	0	0
ENSG00000143207.21	1	1	1	1	1	1	1	1	1	1	0
ENSG00000198797.7	0	0	0	1	1	1	0	0	0	0	0
ENSG00000120341.19	1	1	1	0	1	0	0	0	1	0	0
ENSG00000075391.18	4	2	4	4	4	4	4	1	4	4	4
ENSG00000116191.19	1	1	1	1	1	1	1	1	1	1	1
ENSG00000116194.13	1	0	1	0	0	0	0	1	1	1	1
ENSG00000116199.12	1	1	1	1	1	1	1	1	1	1	1
ENSG00000186283.14	1	1	1	1	1	1	1	1	1	1	1
ENSG00000143322.21	1	1	1	1	1	1	1	1	1	1	1
ENSG00000057252.13	1	1	1	1	1	1	1	1	1	1	1
ENSG00000169905.13	2	2	2	2	2	2	1	2	1	2	2
ENSG00000143337.19	1	1	1	1	1	1	1	1	1	1	1
ENSG00000135837.16	1	1	1	1	1	1	1	1	1	1	1
ENSG00000116260.17	3	2	2	2	2	3	1	2	1	2	2
ENSG00000230124.8	1	1	0	2	1	1	1	1	2	2	1
ENSG00000143324.14	0	1	2	2	1	1	1	2	2	2	1
ENSG00000135835.12	1	0	0	0	0	0	0	0	0	0	1
ENSG00000135823.14	1	0	1	1	1	1	1	1	1	1	1
ENSG00000153029.16	1	1	2	1	0	1	1	2	1	1	2
ENSG00000162783.11	1	1	1	1	1	1	1	1	1	1	1
ENSG00000135821.19	2	2	2	2	1	2	1	1	1	1	1
ENSG00000135828.11	1	1	1	0	0	0	0	0	0	0	0
ENSG00000143333.7	1	1	0	0	0	0	0	0	0	0	0
ENSG00000135824.13	0	0	1	0	0	0	0	0	0	0	0
ENSG00000135838.14	0	2	0	0	0	1	0	0	0	0	0
ENSG00000135829.17	0	1	1	1	1	1	1	1	1	1	1
ENSG00000135862.6	1	1	1	1	1	1	1	1	1	1	1
ENSG00000058085.15	0	0	0	0	1	1	0	0	0	0	0
ENSG00000116698.22	1	1	1	1	1	1	1	1	1	1	1
ENSG00000116701.15	1	1	0	0	1	1	1	0	1	0	1
ENSG00000162704.16	1	0	0	1	1	2	2	1	1	2	1
ENSG00000143344.16	0	0	1	1	1	1	1	1	1	0	1
ENSG00000198756.12	0	0	0	0	1	0	1	1	1	1	1
ENSG00000198860.14	3	2	2	3	3	4	2	3	2	3	3
ENSG00000116667.15	1	1	1	1	1	1	0	0	0	0	0
ENSG00000116406.20	0	0	1	0	1	0	0	1	1	0	1
ENSG00000135842.17	0	0	1	0	0	1	0	0	0	0	0
ENSG00000121481.11	1	1	0	1	1	1	1	1	1	1	1
ENSG00000121486.12	1	1	1	1	1	1	1	1	1	1	1
ENSG00000116668.13	1	1	1	1	1	1	1	1	0	1	0
ENSG00000116679.16	0	0	0	1	1	0	1	1	1	0	0
ENSG00000143341.12	1	1	1	0	0	0	0	0	0	0	0
ENSG00000116690.13	1	1	1	0	0	0	0	0	0	0	0
ENSG00000047410.14	1	1	1	1	1	1	1	1	1	1	1
ENSG00000157181.16	1	1	1	1	1	1	1	2	1	1	1
ENSG00000116711.10	0	0	1	1	0	0	0	0	0	0	0
ENSG00000162670.11	0	0	0	1	1	0	0	0	0	0	0
ENSG00000150681.10	0	0	1	0	0	0	0	0	0	0	0
ENSG00000090104.12	1	1	1	0	0	0	0	0	0	0	0
ENSG00000116741.8	1	1	1	1	1	1	0	1	1	1	1
ENSG00000116750.14	1	1	1	3	2	3	3	1	1	1	2
ENSG00000116747.13	1	1	1	0	1	1	1	2	1	1	1
ENSG00000023572.10	1	1	1	1	1	1	1	1	1	1	1
ENSG00000134371.14	1	1	0	0	1	2	1	1	0	1	1
ENSG00000162687.19	1	0	0	1	0	0	0	0	0	0	0
ENSG00000000971.17	8	6	9	2	1	3	0	0	0	0	0
ENSG00000116785.15	2	1	1	0	0	0	0	0	0	0	0
ENSG00000244414.7	2	1	2	0	0	1	0	0	0	0	0
ENSG00000134365.14	2	1	1	0	0	0	0	0	0	0	0
ENSG00000080910.13	4	2	5	0	0	0	0	0	0	0	0
ENSG00000134389.10	1	1	1	0	0	0	0	0	0	0	0
ENSG00000143278.5	2	2	2	0	0	0	0	0	0	1	1
ENSG00000066279.19	0	0	0	4	4	4	3	3	4	0	3
ENSG00000177888.8	1	1	1	1	0	1	1	1	0	0	0
ENSG00000213047.13	1	1	1	1	1	1	0	1	1	0	1
ENSG00000203724.11	1	1	1	1	1	1	1	1	1	1	1
ENSG00000143355.16	0	0	1	0	0	0	0	0	0	0	0
ENSG00000151414.15	1	1	1	1	1	1	1	1	1	1	1
ENSG00000081237.20	1	1	1	0	0	0	0	0	0	0	0
ENSG00000116833.14	1	1	1	1	1	1	0	0	0	0	0
ENSG00000162702.8	1	1	1	1	1	1	1	1	1	1	1
ENSG00000118193.12	0	0	0	1	1	1	0	1	1	0	1
ENSG00000118197.14	1	1	1	0	2	1	1	1	1	1	2
ENSG00000118200.15	1	0	0	2	1	1	1	1	1	1	1
ENSG00000163362.11	0	0	0	1	1	1	1	1	1	1	1
ENSG00000116852.15	0	3	0	2	2	2	3	0	0	3	0
ENSG00000116857.17	1	1	1	1	1	2	1	1	1	1	1
ENSG00000159166.15	0	0	1	2	1	2	2	1	1	1	2
ENSG00000159173.19	0	0	1	2	1	2	1	0	0	1	1
ENSG00000174307.7	1	0	1	0	0	0	1	1	1	1	1
ENSG00000159176.14	1	1	1	1	1	1	1	1	1	1	1
ENSG00000198700.10	1	1	1	2	2	2	1	2	1	1	1
ENSG00000198892.7	0	0	0	0	1	0	1	0	1	1	0
ENSG00000163431.13	1	0	1	0	0	0	0	0	0	0	0
ENSG00000134375.11	1	1	1	1	1	1	1	1	1	1	1
ENSG00000176393.11	0	1	1	1	1	1	1	1	1	1	1
ENSG00000163435.16	2	1	1	2	2	1	1	2	1	2	3
ENSG00000143862.8	1	1	1	1	1	1	1	1	1	1	1
ENSG00000077152.11	0	0	0	1	1	1	1	1	0	0	0
ENSG00000077157.22	2	2	2	2	2	2	2	2	2	2	2
ENSG00000143858.12	0	0	0	0	1	1	0	0	0	0	0
ENSG00000117139.18	1	0	1	3	2	2	3	4	4	3	4
ENSG00000183155.5	1	1	1	1	1	1	1	1	1	1	1
ENSG00000117153.16	1	2	1	1	1	1	1	1	1	1	1
ENSG00000159346.13	1	2	1	1	1	1	1	1	1	1	1
ENSG00000159348.13	1	1	1	1	1	1	1	1	1	1	1
ENSG00000163444.12	1	1	1	1	1	1	1	1	1	1	1
ENSG00000163485.17	0	0	0	0	0	0	0	1	0	0	0
ENSG00000133048.13	1	1	1	0	0	0	0	0	0	0	0
ENSG00000159388.6	0	1	1	1	1	1	1	1	1	1	1
ENSG00000122176.12	1	1	0	0	1	1	0	0	0	0	0
ENSG00000188783.6	1	1	1	0	0	0	0	0	0	0	0
ENSG00000058668.15	0	0	0	2	1	0	0	0	2	2	0
ENSG00000058673.17	1	1	1	1	2	1	2	2	1	2	2
ENSG00000257315.3	1	1	1	1	1	1	1	1	1	1	1
ENSG00000182004.13	1	1	1	1	1	1	1	1	1	0	0
ENSG00000143842.15	0	0	1	1	1	1	1	1	1	1	2
ENSG00000143845.15	1	1	1	1	1	1	1	1	1	1	1
ENSG00000170498.10	1	0	0	1	0	0	0	0	0	0	0
ENSG00000174567.8	1	1	1	1	1	1	1	1	1	1	1
ENSG00000143850.16	1	1	1	1	1	1	1	1	1	1	2
ENSG00000158615.10	0	1	0	0	1	0	0	1	1	0	0
ENSG00000133056.14	0	0	0	1	0	0	0	1	0	0	1
ENSG00000198625.14	7	7	6	0	6	7	6	0	6	6	7
ENSG00000174529.7	0	1	0	0	0	1	0	0	0	0	0
ENSG00000117222.14	1	1	1	1	1	1	1	1	1	1	1
ENSG00000133059.17	0	0	1	1	0	1	1	1	0	1	1
ENSG00000163545.11	0	1	0	1	1	1	1	1	1	1	0
ENSG00000281406.2	0	0	0	0	0	0	1	1	1	1	0
ENSG00000117266.16	1	1	1	1	1	1	0	1	1	1	1
ENSG00000158711.14	1	1	1	1	0	2	2	2	2	2	2
ENSG00000158715.6	0	0	1	1	0	0	0	0	1	1	1
ENSG00000069275.13	1	1	1	1	1	1	1	1	1	1	1
ENSG00000117280.13	1	1	1	1	1	1	1	1	1	1	1
ENSG00000133065.11	0	0	0	0	0	0	0	0	0	1	0
ENSG00000196188.12	0	0	0	1	1	1	0	1	0	0	0
ENSG00000263961.8	0	1	0	0	0	0	1	0	0	0	0
ENSG00000196550.11	0	0	0	2	1	2	1	1	1	1	1
ENSG00000266028.8	2	0	0	1	1	1	2	1	1	1	1
ENSG00000263528.8	0	0	1	1	1	1	1	2	1	0	1
ENSG00000266094.8	1	0	0	0	0	0	0	0	0	0	0
ENSG00000143486.16	1	1	1	1	1	1	1	1	1	1	1
ENSG00000143479.18	1	0	1	1	1	0	0	1	0	1	0
ENSG00000162889.11	1	2	1	1	1	1	1	1	1	1	2
ENSG00000162894.12	0	1	1	0	0	0	0	0	0	0	0
ENSG00000162896.6	1	1	1	0	0	0	0	0	0	0	0
ENSG00000162897.16	1	0	1	0	0	0	0	0	0	0	0
ENSG00000182795.13	0	0	0	0	1	1	1	1	0	1	0
ENSG00000123836.15	0	2	0	2	1	2	2	2	1	1	1
ENSG00000180667.11	1	1	0	1	1	1	1	1	1	1	1
ENSG00000123843.13	1	2	2	1	1	2	2	2	2	2	2
ENSG00000123838.11	1	1	1	1	1	1	1	1	1	1	1
ENSG00000196352.18	1	3	1	1	2	1	1	1	1	2	2
ENSG00000117335.21	4	5	3	4	6	5	4	4	5	3	3
ENSG00000174059.17	1	0	1	0	0	0	0	0	0	0	0
ENSG00000076356.7	1	0	1	1	1	1	1	1	1	0	1
ENSG00000196878.15	0	1	1	1	0	0	0	0	0	0	0
ENSG00000123689.6	1	1	1	0	0	0	0	0	0	0	0
ENSG00000117594.10	2	1	2	0	0	0	0	0	0	0	0
ENSG00000162757.4	1	0	1	0	0	0	0	0	0	0	0
ENSG00000117595.13	1	1	1	0	0	0	0	0	0	0	1
ENSG00000117597.18	1	1	1	1	1	1	1	1	1	1	1
ENSG00000054392.13	0	0	0	0	0	0	1	1	1	0	1
ENSG00000117625.14	2	1	1	2	1	2	2	2	1	1	1
ENSG00000082512.15	0	0	0	0	0	0	0	0	0	1	1
ENSG00000170385.10	1	1	1	1	1	1	1	1	1	1	1
ENSG00000117650.13	0	0	0	1	1	1	1	1	1	1	1
ENSG00000123684.13	1	1	1	1	1	1	1	1	1	1	1
ENSG00000143493.13	1	2	1	2	1	1	1	1	1	1	1
ENSG00000143476.18	1	0	0	1	1	1	1	1	1	0	1
ENSG00000066027.12	1	1	1	1	1	1	1	1	1	1	1
ENSG00000065600.13	0	1	0	1	1	1	1	1	1	1	1
ENSG00000117691.10	1	0	1	1	1	0	1	1	1	1	1
ENSG00000162772.17	1	1	1	1	1	1	1	1	1	1	1
ENSG00000123685.9	0	0	0	1	0	1	0	0	0	0	0
ENSG00000117697.15	1	1	1	1	1	1	1	1	1	1	1
ENSG00000203705.11	0	0	1	1	0	0	1	0	1	0	0
ENSG00000185523.6	0	0	0	0	1	0	0	0	0	0	0
ENSG00000162769.13	1	0	0	2	1	1	1	1	1	1	1
ENSG00000143494.16	0	0	0	1	1	1	1	1	0	0	0
ENSG00000174606.14	1	1	1	1	1	1	0	0	1	1	1
ENSG00000136643.12	0	1	0	1	2	1	0	1	1	1	1
ENSG00000117707.16	1	1	1	3	1	2	1	1	3	1	1
ENSG00000143499.14	1	0	0	0	1	1	0	0	1	0	0
ENSG00000152104.12	0	0	1	2	1	1	1	1	1	1	0
ENSG00000117724.14	1	0	0	1	1	1	1	1	1	1	1
ENSG00000136636.13	1	1	1	1	1	0	1	1	1	1	1
ENSG00000042781.14	2	2	2	2	0	0	0	0	0	0	0
ENSG00000092978.11	2	1	1	2	2	2	0	1	2	1	0
ENSG00000162814.11	0	0	0	0	1	1	0	0	1	0	0
ENSG00000067533.6	0	1	1	1	1	1	1	1	1	1	1
ENSG00000092969.12	0	0	0	1	0	1	0	0	0	0	0
ENSG00000143353.12	1	1	1	0	0	2	0	1	1	1	0
ENSG00000196660.12	1	1	1	0	1	1	1	0	1	1	1
ENSG00000136628.18	1	1	1	1	1	1	1	1	1	1	1
ENSG00000162813.18	1	1	1	1	1	1	1	1	1	1	1
ENSG00000067704.10	1	1	1	1	1	1	1	1	1	1	1
ENSG00000118873.17	1	1	1	1	2	2	2	1	1	1	2
ENSG00000162817.7	1	1	1	1	1	1	1	1	1	1	1
ENSG00000117791.16	1	1	1	1	1	1	1	1	1	1	1
ENSG00000186205.14	1	3	2	3	3	2	2	2	3	1	2
ENSG00000136630.13	1	1	1	0	0	0	1	0	1	0	0
ENSG00000143507.18	1	0	1	0	0	0	0	1	1	1	0
ENSG00000143498.18	1	0	1	1	1	1	1	1	1	1	0
ENSG00000154305.18	1	2	1	1	1	1	1	1	1	1	1
ENSG00000186063.13	1	1	1	1	1	1	1	1	1	1	1
ENSG00000162819.12	1	1	1	1	1	1	1	1	1	1	1
ENSG00000154309.9	0	0	0	0	1	0	0	0	0	0	0
ENSG00000143502.16	0	0	1	0	1	0	0	0	0	0	0
ENSG00000162909.18	1	1	1	1	1	1	1	1	1	1	1
ENSG00000143514.17	1	1	1	1	1	1	1	1	1	1	1
ENSG00000143756.12	1	1	1	1	1	1	1	1	1	1	1
ENSG00000143753.13	1	1	1	1	1	1	1	1	1	1	1
ENSG00000143748.18	1	0	0	1	1	1	1	1	1	1	1
ENSG00000143771.12	0	1	0	2	1	2	1	1	1	1	1
ENSG00000162923.17	3	1	1	3	1	1	2	3	2	2	2
ENSG00000143786.8	0	0	0	0	1	0	0	0	0	0	0
ENSG00000185842.16	0	0	3	3	3	3	3	3	4	5	3
ENSG00000143815.15	1	1	1	2	1	1	1	1	1	1	1
ENSG00000154380.19	3	3	3	4	4	4	3	3	3	3	3
ENSG00000143742.14	1	2	1	1	1	1	2	2	1	1	1
ENSG00000143819.13	1	2	1	1	1	1	3	2	3	2	1
ENSG00000196187.12	1	1	1	1	1	1	1	1	1	1	1
ENSG00000243709.1	0	0	0	0	1	1	0	0	0	0	0
ENSG00000143811.20	1	1	1	1	1	1	1	1	1	1	1
ENSG00000143768.13	0	0	0	0	0	0	0	0	0	1	0
ENSG00000143751.10	1	1	0	1	1	1	1	1	1	1	1
ENSG00000163041.13	1	1	1	2	2	1	1	1	1	1	1
ENSG00000182827.9	1	1	1	1	1	1	1	1	1	1	1
ENSG00000185155.12	0	0	0	1	1	0	1	1	1	1	1
ENSG00000183814.16	1	0	0	1	1	1	1	1	1	0	1
ENSG00000143799.14	0	0	1	1	1	2	1	1	1	1	1
ENSG00000143772.11	1	1	0	0	0	0	0	0	0	0	0
ENSG00000143801.18	1	2	1	0	2	1	1	1	1	1	1
ENSG00000163050.18	1	0	1	0	1	0	1	1	1	2	1
ENSG00000143776.20	5	5	5	5	5	5	4	5	5	4	4
ENSG00000181450.18	2	0	1	0	2	1	0	0	0	0	0
ENSG00000143740.15	3	2	1	2	2	2	2	1	2	3	3
ENSG00000081692.13	1	1	0	1	1	1	1	1	1	1	1
ENSG00000143761.16	1	1	1	1	1	1	1	1	1	1	1
ENSG00000143793.13	1	1	1	1	1	1	1	0	1	1	1
ENSG00000162910.19	4	6	4	6	7	5	3	3	3	4	3
ENSG00000143774.17	2	3	2	3	3	4	2	2	3	1	2
ENSG00000198835.4	1	0	0	0	0	0	0	1	1	1	1
ENSG00000181873.13	1	1	1	0	1	1	1	1	1	1	1
ENSG00000154370.16	1	1	1	1	1	1	1	2	1	1	1
ENSG00000181218.6	0	0	0	1	1	1	0	0	0	0	0
ENSG00000168159.15	1	1	1	1	1	1	1	1	1	1	1
ENSG00000116574.6	1	1	1	1	1	1	1	1	1	1	1
ENSG00000168118.12	1	1	1	1	1	1	1	1	1	1	1
ENSG00000154429.11	0	0	1	1	1	1	1	1	1	1	1
ENSG00000143632.15	0	0	0	0	0	1	1	1	1	0	0
ENSG00000069248.12	1	1	1	1	1	1	1	1	1	1	1
ENSG00000135776.5	1	1	1	1	1	1	1	1	1	1	1
ENSG00000135801.10	0	2	2	2	2	1	2	2	2	2	1
ENSG00000135763.10	1	0	0	1	1	1	1	1	1	1	1
ENSG00000143641.10	0	1	1	1	1	1	1	1	1	1	1
ENSG00000177614.11	0	1	1	0	0	1	0	0	0	0	0
ENSG00000135775.14	0	0	1	1	1	1	1	1	1	1	0
ENSG00000135744.9	4	4	4	4	4	4	4	3	4	3	3
ENSG00000119280.17	1	1	1	1	1	1	1	1	1	1	1
ENSG00000143643.13	0	1	0	1	1	1	1	1	1	1	1
ENSG00000173409.14	1	1	1	1	2	1	1	1	1	1	1
ENSG00000182118.8	1	1	1	1	1	1	0	0	0	1	1
ENSG00000143633.13	0	0	1	1	1	1	1	1	1	1	1
ENSG00000116906.13	1	1	1	1	0	1	1	1	1	1	1
ENSG00000116903.7	1	1	1	1	1	1	1	1	1	1	1
ENSG00000010072.16	0	1	2	2	2	1	1	1	2	1	1
ENSG00000135766.9	1	1	1	2	2	2	1	1	1	1	1
ENSG00000116918.15	1	1	1	1	1	1	1	1	1	1	1
ENSG00000162946.23	1	0	0	0	1	0	1	0	1	1	1
ENSG00000116991.12	1	0	1	1	1	1	0	0	0	0	0
ENSG00000212916.6	1	0	1	1	1	0	0	0	0	0	0
ENSG00000135778.12	1	1	1	1	2	1	1	1	1	2	1
ENSG00000143674.11	1	1	1	0	1	1	0	0	0	0	0
ENSG00000135750.15	1	1	1	0	0	0	0	0	0	0	0
ENSG00000168275.16	1	3	1	2	1	1	2	2	2	2	2
ENSG00000059588.10	0	0	0	1	1	1	1	1	1	1	1
ENSG00000168264.11	1	1	1	2	2	1	1	1	2	1	1
ENSG00000173726.11	1	1	1	1	1	1	1	1	1	1	1
ENSG00000188739.15	1	1	1	2	2	2	2	2	2	1	1
ENSG00000054267.22	1	1	1	1	1	1	1	1	0	1	1
ENSG00000152904.11	2	1	1	2	2	2	1	2	2	1	2
ENSG00000285053.1	0	1	0	1	1	0	1	1	1	1	0
ENSG00000284770.2	0	1	0	1	2	1	0	1	0	1	1
ENSG00000162885.14	1	1	1	1	1	2	1	1	1	1	1
ENSG00000168243.11	0	0	0	2	2	1	2	2	3	2	2
ENSG00000143669.15	1	1	0	0	1	1	1	0	0	0	0
ENSG00000116962.15	1	1	1	1	1	1	1	1	1	1	1
ENSG00000077585.14	1	1	0	1	1	0	0	0	0	0	1
ENSG00000086619.15	0	1	1	0	0	0	0	0	0	1	1
ENSG00000186197.15	0	0	0	1	1	1	0	0	0	0	0
ENSG00000116977.19	1	1	1	1	2	1	2	2	2	1	1
ENSG00000119285.11	0	0	0	1	1	1	1	1	1	1	1
ENSG00000116984.15	2	2	2	2	2	2	2	2	2	2	2
ENSG00000133019.12	0	0	0	2	0	2	0	0	0	0	0
ENSG00000155816.21	0	0	0	0	0	1	0	0	0	0	0
ENSG00000180875.5	1	1	1	0	0	0	0	0	0	0	0
ENSG00000091483.8	1	0	1	1	1	1	1	1	1	1	1
ENSG00000117009.12	1	2	1	0	0	1	0	0	0	0	0
ENSG00000054277.14	1	1	0	1	1	1	0	1	0	1	1
ENSG00000203668.3	1	1	1	1	1	1	1	1	1	1	1
ENSG00000174371.17	0	0	0	1	1	1	1	1	1	0	0
ENSG00000143702.16	0	0	0	0	1	0	0	1	1	1	1
ENSG00000054282.16	0	1	0	2	1	1	1	1	1	1	1
ENSG00000117020.19	2	0	0	0	0	0	0	0	0	0	0
ENSG00000179456.11	1	1	1	1	1	1	1	1	0	1	0
ENSG00000035687.10	1	1	1	1	1	1	1	1	1	1	1
ENSG00000179397.18	1	0	0	0	0	0	0	0	0	0	0
ENSG00000121644.19	1	1	1	1	1	1	1	1	1	1	1
ENSG00000203667.10	1	1	1	1	1	1	1	1	2	2	2
ENSG00000153187.20	2	2	3	4	5	5	4	3	5	3	3
ENSG00000203666.13	0	0	0	1	1	0	0	0	0	0	0
ENSG00000162849.16	0	0	0	2	0	0	0	0	0	0	0
ENSG00000185420.19	0	1	0	1	1	1	1	2	1	1	1
ENSG00000162851.8	1	1	1	1	1	1	1	1	1	1	1
ENSG00000162852.14	2	2	1	1	1	1	1	1	1	1	1
ENSG00000143653.10	1	1	1	1	1	1	1	1	1	1	1
ENSG00000153207.16	0	1	2	2	3	3	3	2	3	3	2
ENSG00000197472.15	0	0	0	0	1	1	1	2	2	0	1
ENSG00000277462.2	0	0	0	1	1	1	1	1	1	0	1
ENSG00000188295.15	0	0	0	0	1	1	1	1	1	0	1
ENSG00000196418.13	2	0	1	2	2	2	2	2	1	2	2
ENSG00000162714.13	1	1	1	1	1	1	1	1	1	1	1
ENSG00000203663.4	0	0	0	1	0	0	0	0	0	0	0
ENSG00000228198.3	1	0	1	0	0	0	0	0	0	1	1
ENSG00000175137.11	0	0	1	1	0	0	1	1	1	1	1
ENSG00000171161.13	1	1	1	1	1	1	1	1	1	1	1
ENSG00000171163.16	0	0	0	0	1	1	1	0	0	0	0
ENSG00000185220.12	1	0	1	1	1	0	1	0	1	1	1
ENSG00000184731.6	1	1	1	0	0	0	1	0	1	1	0
ENSG00000035115.22	2	0	1	1	0	0	1	0	1	0	1
ENSG00000143727.16	1	1	1	2	2	2	2	2	2	2	2
ENSG00000189292.16	1	0	1	0	0	0	0	0	0	0	0
ENSG00000151353.15	0	0	0	2	1	1	0	0	1	1	0
ENSG00000130508.11	1	1	1	0	0	0	0	0	0	0	0
ENSG00000032389.13	1	1	1	1	1	1	1	2	1	1	1
ENSG00000171853.16	2	1	1	1	3	2	1	1	1	1	2
ENSG00000182551.14	2	2	1	2	1	2	1	1	2	1	1
ENSG00000171865.10	1	1	1	1	1	1	1	1	1	1	1
ENSG00000171863.15	3	2	3	4	3	4	4	3	4	4	4
ENSG00000118004.18	3	3	2	0	0	0	1	0	1	0	0
ENSG00000134321.13	1	1	0	0	0	1	0	0	0	0	0
ENSG00000151692.15	1	0	0	1	1	1	1	1	1	1	1
ENSG00000115738.10	1	1	1	1	1	1	1	2	1	1	1
ENSG00000134313.17	2	1	1	1	4	1	1	1	2	3	3
ENSG00000143797.12	1	0	0	0	0	0	0	0	0	0	0
ENSG00000151693.11	0	0	0	0	0	0	1	1	1	1	1
ENSG00000119185.13	1	0	0	2	2	2	2	3	2	2	2
ENSG00000119203.14	0	1	1	1	1	1	1	1	1	1	1
ENSG00000134330.19	1	1	1	1	1	1	1	1	1	1	1
ENSG00000151694.14	1	0	0	1	0	0	0	0	0	0	1
ENSG00000134308.14	1	1	1	1	1	1	1	1	1	1	1
ENSG00000115750.17	0	1	1	1	1	1	2	1	1	1	1
ENSG00000134317.18	1	1	1	1	1	1	1	1	2	1	1
ENSG00000172059.11	1	0	1	1	1	1	0	1	1	1	1
ENSG00000205795.5	1	1	0	1	0	0	0	0	0	0	0
ENSG00000171848.16	1	0	0	2	1	1	1	1	2	1	1
ENSG00000115756.13	1	1	1	1	1	1	1	2	1	1	1
ENSG00000115758.13	1	1	1	1	1	1	1	1	1	1	1
ENSG00000115761.17	0	2	1	2	1	1	2	2	3	1	1
ENSG00000143882.12	0	0	0	0	0	0	1	0	0	0	0
ENSG00000143870.13	2	3	2	2	2	2	2	3	2	2	3
ENSG00000162976.13	1	1	1	1	1	1	0	0	1	1	0
ENSG00000134318.15	1	1	1	1	1	1	1	1	1	1	1
ENSG00000169016.17	0	0	0	1	0	2	1	1	1	0	1
ENSG00000196208.14	1	0	0	3	4	2	4	4	3	2	3
ENSG00000134324.12	1	1	1	1	1	1	1	1	1	1	1
ENSG00000071575.12	1	1	2	0	0	0	0	0	0	1	0
ENSG00000151779.13	3	1	2	2	2	1	2	3	0	1	1
ENSG00000079785.16	1	3	2	3	5	3	3	4	3	3	2
ENSG00000134323.12	0	0	0	2	2	1	0	0	0	0	0
ENSG00000197872.11	0	0	1	1	1	0	0	0	0	0	0
ENSG00000163032.12	2	1	1	1	1	1	1	2	2	1	2
ENSG00000163029.16	1	1	1	1	1	1	1	1	1	1	2
ENSG00000178295.15	2	0	2	2	2	2	2	2	2	0	0
ENSG00000170745.12	1	1	1	0	0	0	0	0	0	0	0
ENSG00000240857.2	1	1	1	1	1	1	1	1	1	1	1
ENSG00000143867.7	0	0	0	0	0	1	0	1	0	1	0
ENSG00000183891.6	1	1	1	1	1	1	1	1	1	1	2
ENSG00000118965.16	2	0	1	0	1	1	1	1	1	1	1
ENSG00000132031.13	0	0	0	1	1	1	1	1	1	1	1
ENSG00000068697.7	1	1	1	1	1	1	1	1	1	1	1
ENSG00000115884.11	1	1	1	1	1	1	1	1	2	1	1
ENSG00000055917.16	1	1	1	1	1	1	1	1	1	1	1
ENSG00000143878.10	1	1	1	1	1	1	1	1	1	1	1
ENSG00000118960.13	2	1	2	3	2	2	2	3	2	1	2
ENSG00000143869.7	1	1	1	1	1	1	1	1	1	1	1
ENSG00000118961.15	1	1	1	1	1	1	1	1	1	1	1
ENSG00000084674.15	1	2	1	2	2	2	2	1	2	2	2
ENSG00000119771.15	0	0	1	1	1	0	0	0	0	0	0
ENSG00000119778.15	1	1	0	0	1	1	1	1	1	1	1
ENSG00000173960.14	0	1	1	0	1	1	1	1	1	1	0
ENSG00000163026.12	1	1	0	1	1	1	1	1	1	1	1
ENSG00000119782.14	0	0	0	1	1	1	1	1	1	1	1
ENSG00000115128.7	1	1	1	1	1	1	1	1	1	1	1
ENSG00000219626.9	1	0	1	0	0	0	0	0	0	0	0
ENSG00000115129.14	1	1	0	1	1	1	1	2	2	1	1
ENSG00000176732.7	0	1	0	0	0	0	0	0	0	0	0
ENSG00000198399.16	1	1	1	2	1	1	2	2	2	2	1
ENSG00000084676.16	1	1	1	1	1	1	1	1	1	1	1
ENSG00000184924.6	1	1	1	1	1	1	1	1	1	1	1
ENSG00000138092.11	1	0	0	1	1	1	1	1	1	1	1
ENSG00000138031.15	1	1	1	1	0	1	0	0	0	0	0
ENSG00000115137.12	1	1	0	1	0	0	1	1	1	0	1
ENSG00000084710.14	0	0	0	0	0	0	1	0	0	0	0
ENSG00000119772.19	2	0	3	1	3	3	3	4	2	3	3
ENSG00000138101.20	0	1	1	0	1	0	1	1	1	1	1
ENSG00000143970.18	1	1	2	2	2	2	2	2	2	2	2
ENSG00000084731.15	0	0	0	1	1	1	1	1	1	1	1
ENSG00000084733.11	1	1	1	1	1	1	1	1	1	1	1
ENSG00000157833.13	0	0	0	1	0	1	0	0	1	0	1
ENSG00000084754.12	1	1	1	1	1	2	1	1	1	0	1
ENSG00000138029.14	1	1	1	1	1	1	1	1	2	1	1
ENSG00000138018.19	1	1	1	1	1	1	1	1	1	1	1
ENSG00000115155.19	0	1	1	0	0	0	0	0	0	0	0
ENSG00000171303.8	0	1	0	0	0	0	0	0	0	0	0
ENSG00000213699.9	0	0	0	0	0	1	0	0	0	0	0
ENSG00000115163.15	0	0	0	1	1	1	1	1	1	1	1
ENSG00000157851.17	0	0	0	1	1	1	0	0	0	0	0
ENSG00000084764.12	1	1	1	1	1	1	0	1	1	1	1
ENSG00000119777.20	1	1	1	1	1	0	1	1	1	1	1
ENSG00000084693.16	1	2	1	1	1	1	2	2	1	2	2
ENSG00000228474.6	1	2	1	1	2	1	2	2	2	2	2
ENSG00000138080.14	2	1	1	0	0	0	2	2	1	1	1
ENSG00000138030.13	1	1	1	1	0	1	1	1	1	1	1
ENSG00000138028.17	0	0	0	0	0	0	1	3	2	3	2
ENSG00000138073.14	2	1	1	1	0	2	1	0	1	0	0
ENSG00000138074.15	0	1	0	1	1	0	1	1	1	1	1
ENSG00000138085.18	1	2	1	2	2	2	2	2	2	2	2
ENSG00000084774.14	1	0	1	1	1	1	1	1	2	1	1
ENSG00000115194.11	0	0	0	0	0	0	0	1	0	0	1
ENSG00000163794.6	0	0	1	0	0	0	0	0	0	1	1
ENSG00000115204.15	0	0	1	3	2	2	1	1	0	0	1
ENSG00000115207.15	1	1	1	1	1	1	1	1	1	1	1
ENSG00000115211.17	1	0	0	0	1	0	0	1	0	0	0
ENSG00000115234.11	1	1	1	1	1	1	1	1	1	0	0
ENSG00000163795.14	1	0	1	1	0	0	2	1	1	1	1
ENSG00000115241.11	1	1	1	1	1	1	1	1	1	1	1
ENSG00000115216.14	1	1	1	1	1	1	1	2	1	1	1
ENSG00000157992.12	1	1	1	0	0	1	0	0	1	0	0
ENSG00000138002.16	0	0	0	0	0	0	1	1	0	1	0
ENSG00000115226.10	1	1	1	1	0	0	1	1	1	1	1
ENSG00000084734.9	1	1	1	1	0	1	1	1	1	1	1
ENSG00000221843.5	0	0	0	0	0	1	1	1	0	0	0
ENSG00000243943.10	0	0	0	1	1	0	1	1	1	1	1
ENSG00000176714.10	0	0	1	0	0	0	1	1	1	1	1
ENSG00000198522.14	1	2	1	1	2	2	2	1	1	1	2
ENSG00000119760.16	1	0	1	2	2	1	2	1	3	2	3
ENSG00000163798.14	1	1	0	1	1	1	1	1	1	1	1
ENSG00000243147.8	1	1	1	1	1	1	1	1	1	2	1
ENSG00000171174.15	2	1	2	1	2	1	2	1	1	1	1
ENSG00000158019.21	1	1	1	1	1	1	2	2	1	1	1
ENSG00000075426.12	1	1	1	1	1	1	1	1	1	1	1
ENSG00000163803.13	0	0	0	0	1	0	0	0	0	0	0
ENSG00000213639.10	1	1	1	2	2	2	2	2	2	1	1
ENSG00000163806.16	0	0	0	0	1	0	0	0	0	0	0
ENSG00000171103.11	1	1	2	1	1	2	1	1	1	1	1
ENSG00000163811.12	1	1	1	2	1	1	1	1	1	1	1
ENSG00000119801.13	1	1	1	1	1	1	1	1	1	1	1
ENSG00000213626.13	1	1	1	0	0	1	0	0	0	0	0
ENSG00000172954.14	1	1	1	1	1	1	1	1	1	1	1
ENSG00000013016.16	1	1	0	0	0	0	0	0	0	0	0
ENSG00000158125.10	1	1	1	0	0	0	0	0	0	0	0
ENSG00000277893.2	1	1	1	0	0	0	0	0	0	0	0
ENSG00000162959.14	1	1	1	2	2	0	2	1	2	2	2
ENSG00000162961.14	1	1	1	1	1	1	1	1	1	2	1
ENSG00000021574.13	1	1	1	1	1	1	1	1	1	1	1
ENSG00000152683.14	1	1	1	1	1	1	1	1	1	1	1
ENSG00000091106.19	0	0	0	0	1	1	0	0	0	0	0
ENSG00000119820.11	1	1	1	1	1	1	1	1	1	1	1
ENSG00000115760.15	1	1	1	1	1	1	1	1	1	2	1
ENSG00000018699.13	1	1	1	1	1	1	1	1	1	1	1
ENSG00000049323.16	1	1	1	1	1	1	0	0	0	0	0
ENSG00000152689.18	1	1	1	1	1	1	0	0	0	0	0
ENSG00000119812.20	2	1	0	1	1	1	1	1	2	1	1
ENSG00000150938.10	1	1	1	1	1	1	1	1	1	1	1
ENSG00000171055.15	1	1	1	2	1	1	1	1	1	1	0
ENSG00000115808.12	1	1	1	1	1	1	1	1	1	1	1
ENSG00000008869.12	1	1	1	1	1	1	1	0	1	1	1
ENSG00000152133.17	1	1	1	1	1	1	1	1	1	1	1
ENSG00000055332.19	7	7	7	0	7	7	6	7	7	7	7
ENSG00000218739.10	1	2	2	3	2	2	1	2	2	2	1
ENSG00000115816.15	1	1	1	1	1	1	1	1	1	1	1
ENSG00000003509.16	1	1	1	1	1	1	1	1	1	1	1
ENSG00000115825.11	1	1	1	1	1	1	1	1	1	1	1
ENSG00000115828.17	0	0	0	1	1	1	1	0	0	0	0
ENSG00000163171.8	1	1	0	0	0	1	0	0	0	0	0
ENSG00000115841.21	2	1	2	1	1	1	1	1	1	1	2
ENSG00000138061.12	0	1	1	1	1	1	0	0	0	0	0
ENSG00000119787.14	2	1	1	1	2	3	1	2	2	2	1
ENSG00000143889.16	1	1	2	3	3	1	4	2	2	1	2
ENSG00000143891.17	1	1	1	1	1	1	1	1	1	1	1
ENSG00000115875.19	1	1	2	2	2	2	2	2	2	1	2
ENSG00000152147.11	1	2	0	2	2	2	2	1	2	2	2
ENSG00000163214.21	1	1	1	1	1	1	2	1	1	0	1
ENSG00000188010.16	1	1	1	1	1	1	1	1	1	1	1
ENSG00000115904.15	1	2	2	2	2	1	2	1	1	1	2
ENSG00000205111.9	0	0	0	0	0	0	1	0	0	0	0
ENSG00000011566.15	1	1	1	1	1	1	1	1	1	1	1
ENSG00000152154.11	0	0	0	1	0	0	0	0	1	0	0
ENSG00000138050.15	0	0	0	0	1	0	1	0	0	0	0
ENSG00000183023.18	1	0	2	0	0	0	0	0	0	0	0
ENSG00000162878.13	1	0	0	1	1	1	1	1	1	1	1
ENSG00000143924.19	0	0	0	0	0	1	1	1	1	1	1
ENSG00000115944.15	0	1	1	1	1	1	1	1	1	1	1
ENSG00000171126.8	0	0	0	0	0	0	0	0	1	1	0
ENSG00000057935.14	1	0	1	2	2	1	2	2	1	1	2
ENSG00000162881.7	1	1	1	1	0	0	1	0	0	0	0
ENSG00000162882.15	1	1	1	0	1	1	1	1	1	1	0
ENSG00000152518.8	1	1	1	1	1	1	1	1	1	1	1
ENSG00000115970.19	0	1	1	1	1	1	1	0	0	0	0
ENSG00000152527.14	0	0	0	1	1	1	0	0	0	0	0
ENSG00000223658.8	0	0	0	0	1	1	0	0	1	0	1
ENSG00000138036.18	2	2	1	2	1	2	1	1	1	1	1
ENSG00000138075.14	0	1	1	0	0	0	1	1	1	1	0
ENSG00000143921.9	1	1	1	0	0	0	1	1	1	1	1
ENSG00000138095.20	1	3	2	2	4	4	5	4	3	4	3
ENSG00000138032.21	2	2	2	2	2	2	2	2	2	2	2
ENSG00000138079.14	2	0	1	1	1	1	0	0	0	0	0
ENSG00000138078.16	1	1	1	1	1	2	1	1	1	1	1
ENSG00000143919.15	1	1	1	1	2	0	1	1	1	1	1
ENSG00000138083.5	0	0	0	0	1	0	0	0	0	0	0
ENSG00000170577.8	0	0	0	1	1	0	0	0	0	0	0
ENSG00000068784.13	0	1	0	1	0	1	1	1	1	1	1
ENSG00000171132.14	1	1	2	2	1	0	1	0	1	0	0
ENSG00000116016.14	0	1	1	1	1	1	1	1	1	1	1
ENSG00000250565.7	0	0	1	0	1	1	0	0	1	0	1
ENSG00000119729.12	1	1	1	1	1	1	1	1	1	1	1
ENSG00000151665.13	0	1	1	1	1	1	1	1	1	1	1
ENSG00000119878.6	1	1	1	1	1	1	1	1	1	1	1
ENSG00000171150.9	1	0	1	1	1	1	1	1	1	1	1
ENSG00000180398.13	1	1	1	2	3	4	3	3	1	2	3
ENSG00000068724.17	0	0	0	0	0	0	1	1	2	2	2
ENSG00000143933.20	2	2	3	3	3	3	3	4	2	3	2
ENSG00000119888.11	1	0	0	1	1	1	1	1	1	1	1
ENSG00000095002.15	1	0	1	1	1	1	1	1	1	1	1
ENSG00000184261.5	0	0	0	0	0	0	0	0	1	0	0
ENSG00000116062.18	1	1	1	1	1	1	1	1	1	1	1
ENSG00000138081.22	0	0	1	1	2	1	3	1	1	1	1
ENSG00000170802.17	1	1	1	1	1	1	1	1	1	1	1
ENSG00000162869.16	0	1	1	1	1	1	1	1	1	1	1
ENSG00000243244.7	1	0	0	0	0	1	0	0	0	0	0
ENSG00000242441.8	1	0	0	0	0	0	0	0	0	0	0
ENSG00000115239.24	2	1	1	1	1	1	1	1	1	1	2
ENSG00000143942.5	0	0	0	1	1	1	1	1	1	1	1
ENSG00000068912.15	1	2	1	4	4	5	2	3	3	5	4
ENSG00000068878.15	0	1	1	1	0	1	1	1	1	1	0
ENSG00000170634.13	2	1	2	1	2	1	2	2	2	3	2
ENSG00000115306.16	3	2	3	3	3	3	3	3	3	3	3
ENSG00000214595.13	0	0	0	0	1	1	1	1	1	0	0
ENSG00000115310.19	3	3	3	3	3	3	3	3	3	2	3
ENSG00000162994.16	0	0	0	0	0	0	1	1	1	1	1
ENSG00000143947.15	2	2	2	2	3	2	3	3	3	3	3
ENSG00000085760.15	1	1	1	1	1	1	2	1	1	1	1
ENSG00000115355.18	6	0	3	7	7	7	6	5	6	6	0
ENSG00000163001.12	1	0	1	1	1	1	1	1	1	1	1
ENSG00000275052.5	1	1	1	1	1	1	2	1	1	1	1
ENSG00000138035.15	1	0	1	1	2	1	1	1	1	1	0
ENSG00000115380.20	1	0	0	1	1	1	0	0	0	0	0
ENSG00000028116.18	1	1	0	1	1	1	1	1	2	2	2
ENSG00000115392.13	1	0	0	2	0	1	2	1	0	1	1
ENSG00000115421.13	0	0	0	0	0	1	0	0	0	0	1
ENSG00000162924.15	2	2	2	2	2	2	2	2	2	2	0
ENSG00000162927.14	2	1	1	2	2	2	2	1	2	2	2
ENSG00000162928.9	1	1	2	2	1	2	2	2	2	2	2
ENSG00000162929.14	0	0	0	1	1	1	0	1	1	0	1
ENSG00000237651.8	1	1	1	1	1	1	1	1	1	1	1
ENSG00000115464.15	3	2	2	2	3	2	2	3	2	2	3
ENSG00000082898.19	5	5	2	6	6	5	7	5	6	4	3
ENSG00000115484.15	1	1	1	1	2	1	1	1	1	2	2
ENSG00000173163.11	1	1	0	1	1	1	1	1	1	1	1
ENSG00000170340.11	1	1	1	1	1	1	1	1	1	1	1
ENSG00000186889.10	0	1	0	0	1	1	0	0	0	0	0
ENSG00000115504.15	1	1	1	1	1	1	1	1	1	1	1
ENSG00000115507.10	0	0	0	1	0	1	1	1	0	1	1
ENSG00000143951.16	0	0	0	0	1	1	1	2	0	0	0
ENSG00000014641.21	1	1	2	1	2	1	1	2	2	2	2
ENSG00000169764.16	2	2	2	2	2	2	2	1	1	1	1
ENSG00000143952.20	1	1	1	1	1	1	2	1	1	1	1
ENSG00000197329.12	1	0	1	1	1	1	1	1	1	1	1
ENSG00000119862.13	1	1	1	1	1	1	1	1	1	1	1
ENSG00000119844.17	1	1	1	1	1	1	1	1	1	1	2
ENSG00000179833.4	1	1	1	1	1	1	1	1	1	1	1
ENSG00000115902.11	1	1	1	1	1	1	1	1	1	1	1
ENSG00000011523.14	1	1	1	1	1	1	1	1	1	1	1
ENSG00000138069.18	2	2	2	2	2	2	2	2	2	2	2
ENSG00000138071.15	1	1	1	1	1	1	1	1	1	1	1
ENSG00000198369.10	1	2	2	2	2	2	1	1	1	1	1
ENSG00000143971.9	1	0	1	1	1	1	1	1	1	1	1
ENSG00000197223.12	1	1	1	1	1	1	1	1	1	1	1
ENSG00000243667.7	1	1	1	1	1	1	1	1	1	1	0
ENSG00000115946.8	1	1	1	1	1	1	1	1	1	1	1
ENSG00000221823.11	1	1	1	1	1	1	1	1	1	1	1
ENSG00000115956.10	1	1	1	0	0	0	0	0	0	0	0
ENSG00000204923.4	1	1	1	1	0	1	1	1	1	1	1
ENSG00000169621.10	0	1	0	0	0	0	0	0	0	0	0
ENSG00000163219.12	0	0	1	0	1	1	0	0	0	0	0
ENSG00000163217.2	1	1	1	0	0	0	0	0	0	0	0
ENSG00000169604.21	1	1	1	1	0	1	2	2	2	3	2
ENSG00000198380.13	1	1	1	3	3	2	3	3	3	3	3
ENSG00000169599.13	1	1	1	1	1	2	1	1	2	1	1
ENSG00000115977.21	2	2	0	2	2	2	2	2	2	2	2
ENSG00000196975.16	1	1	1	2	2	1	2	2	2	2	1
ENSG00000087338.5	1	1	1	1	1	1	1	1	1	1	1
ENSG00000124380.11	1	1	1	1	1	1	1	1	1	1	1
ENSG00000059728.11	1	0	0	1	1	1	1	1	1	1	1
ENSG00000244617.3	0	0	1	0	0	0	0	0	0	0	0
ENSG00000169564.7	1	1	1	1	1	1	1	1	1	1	1
ENSG00000115998.8	1	1	1	1	1	1	1	1	1	1	1
ENSG00000116001.17	2	1	1	1	1	2	2	2	1	1	1
ENSG00000116005.12	1	1	1	1	1	1	1	1	1	1	1
ENSG00000143977.14	2	1	2	2	1	1	1	1	1	1	2
ENSG00000035141.8	1	1	1	2	1	2	1	1	1	1	1
ENSG00000163235.16	1	0	1	0	0	0	1	1	1	1	1
ENSG00000116035.4	0	0	0	0	1	0	1	1	1	0	1
ENSG00000116039.13	0	0	0	0	0	0	0	0	1	0	0
ENSG00000144031.12	0	0	0	0	1	0	0	0	0	0	0
ENSG00000144043.12	1	1	1	1	1	1	1	1	1	1	1
ENSG00000124357.13	1	1	1	2	2	3	2	2	1	1	1
ENSG00000124370.11	2	1	1	1	1	1	1	1	2	2	1
ENSG00000124383.10	0	1	1	2	1	1	2	2	2	1	3
ENSG00000124374.9	1	1	1	1	1	1	0	0	0	0	0
ENSG00000075292.19	2	3	1	1	1	0	1	1	3	2	1
ENSG00000135636.15	0	0	0	0	1	0	0	1	0	1	1
ENSG00000003137.9	0	0	0	1	1	1	0	0	0	0	0
ENSG00000144036.16	1	0	0	1	0	1	1	1	1	1	1
ENSG00000116096.6	1	1	1	1	1	1	1	1	1	1	1
ENSG00000135638.14	0	0	0	0	1	0	0	0	0	0	1
ENSG00000144040.13	0	1	0	1	1	1	2	1	1	0	2
ENSG00000135631.17	0	0	0	0	1	0	0	1	1	1	1
ENSG00000135632.12	1	1	1	1	1	1	1	1	1	1	1
ENSG00000135617.4	1	1	1	1	1	1	1	1	1	1	1
ENSG00000135624.17	2	1	2	2	1	3	1	1	1	2	1
ENSG00000163013.12	1	0	0	0	1	0	1	1	1	1	1
ENSG00000116127.20	0	3	5	0	3	3	5	5	0	7	5
ENSG00000144035.4	1	1	1	1	1	1	1	1	1	1	0
ENSG00000144034.16	1	1	1	2	2	2	1	2	2	2	1
ENSG00000144048.11	1	0	0	0	0	0	1	1	1	1	1
ENSG00000124356.17	2	3	1	3	1	3	2	2	3	3	1
ENSG00000163017.14	1	0	0	0	0	0	0	0	0	0	0
ENSG00000114956.20	1	1	1	1	1	1	2	1	1	1	1
ENSG00000187605.16	1	0	1	0	1	1	1	1	0	1	1
ENSG00000163170.12	1	1	1	1	1	1	1	1	1	1	1
ENSG00000114978.18	1	1	1	1	1	1	1	1	1	1	1
ENSG00000065911.13	0	0	0	3	3	3	2	3	1	2	4
ENSG00000188687.18	0	0	0	0	1	0	0	0	0	0	1
ENSG00000204843.13	1	1	2	2	2	1	2	3	3	2	3
ENSG00000284308.2	0	0	0	0	0	0	0	0	0	0	1
ENSG00000005448.17	0	0	0	0	0	0	0	0	0	0	1
ENSG00000114993.17	1	1	1	1	1	1	1	1	1	1	1
ENSG00000115274.15	1	1	0	1	1	0	1	1	1	1	1
ENSG00000239779.7	1	2	1	2	1	1	1	1	1	1	2
ENSG00000115275.15	1	2	1	3	1	1	2	2	2	1	1
ENSG00000204822.7	1	1	1	1	1	1	1	1	1	1	1
ENSG00000135637.14	0	0	0	1	1	1	0	1	1	0	0
ENSG00000115282.21	0	0	0	0	0	0	0	1	0	0	0
ENSG00000179528.16	0	0	1	0	1	0	1	1	1	1	2
ENSG00000115289.14	1	1	0	1	1	1	1	1	0	1	0
ENSG00000144045.14	0	0	0	0	0	0	1	1	1	0	1
ENSG00000115307.17	1	1	1	1	1	1	1	1	1	1	1
ENSG00000115317.13	0	1	1	1	0	0	1	1	1	1	1
ENSG00000115318.12	0	0	0	0	0	0	0	0	1	0	0
ENSG00000115325.14	0	0	1	1	1	1	0	0	0	0	0
ENSG00000135622.13	0	0	0	0	1	1	1	1	1	1	1
ENSG00000159399.10	0	0	0	1	1	1	1	2	1	1	1
ENSG00000115350.12	1	1	1	1	1	1	1	1	1	1	1
ENSG00000115363.14	1	1	1	1	1	1	1	2	1	2	1
ENSG00000115364.14	1	1	1	2	1	1	2	2	1	2	2
ENSG00000005436.14	2	2	1	2	2	3	2	2	3	2	2
ENSG00000176204.14	0	0	0	0	0	0	0	0	0	0	1
ENSG00000163541.12	1	1	1	1	1	1	1	1	1	1	1
ENSG00000115423.19	0	1	0	0	0	1	0	0	0	0	0
ENSG00000186854.11	1	0	0	0	0	0	0	0	0	0	0
ENSG00000034510.6	1	1	1	1	1	1	1	1	1	1	1
ENSG00000176407.18	1	1	1	1	1	1	1	1	1	1	1
ENSG00000152284.5	1	1	1	0	1	1	0	0	1	1	1
ENSG00000152291.15	1	1	1	1	1	1	1	1	1	1	1
ENSG00000042445.14	1	1	1	1	1	0	1	1	1	1	1
ENSG00000115459.18	1	0	0	0	0	0	1	1	1	1	0
ENSG00000042493.16	1	1	1	1	2	2	1	1	1	1	1
ENSG00000168906.13	1	1	1	1	1	1	1	1	1	1	1
ENSG00000115486.13	1	4	3	3	3	3	2	2	3	1	1
ENSG00000118640.11	1	1	1	1	1	1	1	1	1	1	1
ENSG00000168899.5	1	1	1	1	1	1	1	1	1	1	1
ENSG00000168894.10	0	1	1	2	1	2	2	1	1	1	3
ENSG00000168890.14	1	1	1	1	1	1	1	1	1	1	1
ENSG00000168883.20	1	1	1	2	1	1	1	1	1	1	1
ENSG00000168887.11	1	2	1	1	0	1	2	0	2	2	0
ENSG00000168878.19	0	0	0	0	0	0	0	0	0	0	1
ENSG00000115523.17	1	1	2	0	0	0	0	0	0	0	0
ENSG00000168874.13	0	1	0	0	0	0	0	1	0	0	0
ENSG00000115525.18	2	1	1	3	1	1	0	0	1	0	0
ENSG00000068654.17	0	1	0	1	2	1	1	2	1	1	2
ENSG00000132300.19	1	1	1	1	1	1	1	1	1	1	1
ENSG00000132305.22	1	2	1	2	2	2	2	1	1	1	1
ENSG00000132313.15	1	1	1	2	2	2	2	1	1	1	2
ENSG00000068615.20	0	0	0	0	0	2	0	0	0	0	0
ENSG00000115548.17	1	1	0	1	1	1	1	1	1	1	1
ENSG00000115561.16	1	2	1	1	1	2	2	2	2	2	1
ENSG00000249884.8	0	0	0	0	0	0	0	0	1	0	1
ENSG00000239305.7	1	1	1	1	1	1	1	1	1	1	1
ENSG00000153561.13	1	1	1	1	1	1	1	1	1	1	1
ENSG00000153563.16	0	1	1	0	0	1	0	0	0	0	0
ENSG00000172116.23	0	2	0	1	1	1	0	0	0	0	0
ENSG00000187627.17	1	1	0	0	0	0	0	0	0	0	0
ENSG00000183281.15	2	2	2	1	0	1	0	0	0	1	0
ENSG00000185304.16	0	0	1	0	0	0	0	0	0	0	0
ENSG00000172086.9	1	1	1	1	1	1	0	1	1	1	1
ENSG00000163586.10	1	2	2	1	1	1	2	1	2	1	2
ENSG00000144115.18	1	1	1	1	1	1	0	0	0	0	0
ENSG00000172073.4	0	0	0	0	0	0	0	1	0	0	0
ENSG00000172071.15	1	0	1	0	1	2	0	1	0	0	0
ENSG00000153574.9	1	0	1	1	1	1	1	1	1	1	1
ENSG00000289685.1	3	1	2	3	2	2	1	2	2	2	2
ENSG00000144026.13	1	0	1	0	0	1	1	1	2	1	1
ENSG00000275111.5	1	0	0	0	1	1	0	1	1	0	1
ENSG00000155066.16	0	0	1	0	0	0	0	0	0	0	0
ENSG00000115041.13	0	1	0	0	0	0	0	0	0	0	0
ENSG00000115042.10	2	1	1	1	1	2	1	2	1	1	2
ENSG00000174501.15	1	0	0	0	0	0	0	0	0	0	1
ENSG00000274286.2	1	0	1	0	0	0	0	0	0	0	0
ENSG00000158050.5	0	1	1	0	0	0	0	0	0	0	0
ENSG00000084090.14	1	1	0	1	1	1	1	1	1	1	1
ENSG00000135956.9	1	1	1	1	1	1	2	2	2	2	1
ENSG00000144021.3	1	1	1	1	1	1	1	1	1	1	1
ENSG00000144028.15	1	0	1	1	1	0	1	1	1	1	1
ENSG00000198885.10	0	0	0	1	1	0	1	1	1	2	1
ENSG00000121152.10	0	0	0	2	2	2	2	2	2	1	1
ENSG00000163121.10	1	0	0	0	0	1	0	0	0	0	0
ENSG00000196843.17	0	0	0	0	0	0	0	0	0	0	1
ENSG00000114982.19	0	1	0	0	0	0	1	1	0	0	1
ENSG00000114988.12	1	1	1	1	1	1	1	1	1	1	1
ENSG00000158158.12	1	0	0	1	1	1	1	1	1	1	1
ENSG00000168763.16	1	2	1	1	1	1	2	1	1	1	1
ENSG00000213337.9	1	1	1	1	1	1	1	1	1	1	1
ENSG00000168758.11	0	0	0	1	1	0	1	1	2	1	1
ENSG00000144199.12	1	0	0	0	1	1	1	1	1	1	0
ENSG00000135976.21	0	0	0	0	0	0	0	0	1	0	0
ENSG00000196912.13	0	0	0	0	1	1	0	0	0	0	0
ENSG00000135940.7	1	1	0	1	1	1	1	1	1	1	1
ENSG00000115073.8	1	1	1	1	1	1	1	1	1	1	1
ENSG00000115085.14	0	0	0	0	0	0	0	0	0	0	1
ENSG00000075568.17	1	1	1	1	1	1	1	1	1	1	1
ENSG00000040933.16	3	0	0	3	3	3	3	2	3	3	4
ENSG00000183513.9	1	1	1	1	1	1	1	1	1	1	1
ENSG00000115446.12	1	1	1	1	1	1	1	1	1	2	2
ENSG00000071073.13	1	1	1	2	4	3	2	3	2	1	1
ENSG00000196872.12	0	0	0	1	1	1	0	0	0	1	1
ENSG00000273045.7	0	0	0	0	1	1	1	0	1	1	0
ENSG00000144182.17	0	0	0	1	1	1	1	1	1	1	1
ENSG00000158411.11	0	1	1	1	1	1	1	1	1	1	1
ENSG00000185414.20	2	1	1	1	1	1	1	1	1	1	1
ENSG00000185674.10	0	0	0	0	0	0	0	0	0	0	1
ENSG00000115514.12	1	1	1	1	2	1	1	1	1	1	2
ENSG00000158417.11	1	1	1	1	1	1	1	1	1	1	2
ENSG00000135945.10	1	0	1	1	0	1	1	1	0	1	1
ENSG00000144218.21	3	3	0	3	4	4	0	0	0	0	0
ENSG00000115526.11	0	0	0	1	0	1	1	1	1	1	1
ENSG00000115539.14	1	1	1	1	1	1	1	1	1	1	1
ENSG00000170485.17	0	1	0	1	1	1	1	1	1	1	1
ENSG00000071082.11	5	4	5	6	6	7	8	6	6	5	7
ENSG00000204634.13	1	1	1	1	1	1	1	1	1	1	1
ENSG00000158435.8	1	1	1	1	1	1	1	1	1	1	1
ENSG00000163162.9	1	1	1	1	1	1	1	1	1	1	1
ENSG00000071054.17	1	1	1	3	3	3	4	4	4	3	4
ENSG00000115590.14	0	1	1	0	0	1	0	1	0	0	0
ENSG00000115594.12	2	2	3	1	1	1	1	1	1	1	1
ENSG00000115598.10	0	0	1	0	0	0	0	0	0	0	0
ENSG00000115604.12	0	1	0	0	0	0	0	0	0	0	0
ENSG00000180251.5	0	0	0	1	0	0	0	0	0	0	0
ENSG00000135953.11	0	1	1	1	1	1	1	1	1	1	1
ENSG00000170417.16	0	0	1	1	1	2	1	1	2	1	1
ENSG00000135972.9	0	1	1	1	1	1	1	1	1	1	1
ENSG00000135966.13	1	0	1	1	1	1	1	1	1	1	1
ENSG00000135974.10	1	1	1	1	1	1	2	2	2	1	2
ENSG00000115641.19	1	1	0	1	2	2	1	1	1	1	3
ENSG00000071051.14	2	1	1	2	1	2	1	1	1	1	1
ENSG00000119147.10	0	1	0	0	0	0	0	0	0	0	0
ENSG00000115652.15	1	1	0	1	1	1	1	1	1	1	1
ENSG00000144057.16	1	1	1	0	0	0	0	0	0	0	0
ENSG00000198203.10	0	0	0	0	1	1	0	1	1	1	1
ENSG00000198075.10	0	0	0	1	1	1	1	1	1	0	1
ENSG00000135968.22	1	0	0	1	0	0	1	1	1	0	1
ENSG00000169756.17	1	1	1	1	1	1	2	1	1	1	1
ENSG00000153201.16	1	1	1	1	1	1	1	1	1	1	1
ENSG00000163006.12	0	0	0	1	1	2	1	1	1	1	1
ENSG00000135960.10	1	0	0	0	0	0	0	0	0	0	0
ENSG00000172985.11	0	0	0	0	0	1	0	0	0	0	0
ENSG00000186522.15	1	1	1	1	1	2	2	2	3	1	1
ENSG00000198142.5	1	1	1	1	1	1	1	1	1	1	1
ENSG00000015568.13	0	1	1	1	0	0	0	1	0	1	0
ENSG00000144063.4	1	0	1	0	0	1	0	0	0	0	0
ENSG00000144061.14	0	0	0	0	1	1	1	2	2	0	0
ENSG00000175701.11	1	1	1	1	1	1	1	1	1	1	1
ENSG00000183054.13	1	0	0	0	1	1	1	0	0	1	0
ENSG00000169679.15	0	0	0	1	1	1	1	1	1	1	1
ENSG00000153093.20	0	0	0	0	0	0	0	0	1	0	1
ENSG00000153094.24	1	1	1	2	2	2	2	3	2	1	2
ENSG00000153107.13	0	1	1	1	1	1	1	1	1	1	1
ENSG00000153208.18	1	0	0	1	1	1	1	1	1	1	2
ENSG00000153214.11	1	1	1	1	1	1	1	1	1	1	1
ENSG00000144152.13	1	1	1	1	1	1	1	1	1	1	0
ENSG00000144161.14	0	0	0	1	1	1	1	1	1	1	1
ENSG00000188177.14	2	2	2	0	2	2	0	0	0	2	0
ENSG00000169629.12	0	0	0	0	1	2	0	1	1	0	1
ENSG00000114999.8	1	1	1	1	1	1	1	1	1	1	1
ENSG00000125630.16	1	1	1	1	2	1	2	3	2	1	2
ENSG00000125611.16	1	1	2	1	1	1	1	1	1	1	1
ENSG00000144136.11	0	0	0	1	1	1	1	1	1	1	1
ENSG00000144130.12	0	0	0	0	0	0	0	0	0	0	1
ENSG00000169607.13	0	0	0	1	1	1	1	1	1	1	1
ENSG00000136689.20	1	1	1	0	0	0	1	1	1	1	1
ENSG00000125637.16	2	2	2	2	0	2	2	2	2	2	2
ENSG00000125618.18	1	0	0	0	1	0	1	1	1	1	1
ENSG00000136682.16	0	0	0	1	0	1	0	0	0	1	0
ENSG00000144134.19	0	0	0	1	0	0	0	0	1	0	0
ENSG00000115084.15	1	1	1	1	1	1	1	1	1	1	1
ENSG00000115091.12	1	1	1	1	1	1	1	1	1	1	1
ENSG00000175497.17	0	0	0	0	0	0	1	1	1	1	1
ENSG00000088205.13	1	1	1	1	1	1	1	1	1	1	1
ENSG00000125633.11	1	1	1	1	1	1	1	1	1	1	1
ENSG00000125629.16	0	0	0	1	1	1	1	1	1	1	1
ENSG00000019169.11	1	0	0	0	0	0	0	0	0	0	0
ENSG00000115107.20	1	1	2	1	1	1	1	1	1	1	1
ENSG00000186132.15	0	1	1	1	2	1	1	1	1	1	0
ENSG00000155368.18	2	3	3	2	2	2	2	2	2	1	1
ENSG00000171227.7	1	1	1	1	1	1	1	1	1	1	1
ENSG00000144120.13	1	2	2	2	1	1	2	3	2	2	2
ENSG00000088179.9	1	1	1	1	1	1	1	1	1	1	2
ENSG00000115109.14	1	1	1	2	2	2	2	1	2	2	2
ENSG00000226479.4	1	1	1	1	1	1	1	1	1	1	1
ENSG00000144118.14	1	0	0	1	0	1	1	0	1	1	1
ENSG00000163083.6	1	1	1	1	1	1	1	0	0	1	0
ENSG00000074054.20	1	1	1	1	1	1	1	1	1	1	1
ENSG00000155438.12	1	1	1	1	1	1	1	1	1	1	1
ENSG00000211460.12	1	1	1	1	1	1	1	1	1	1	1
ENSG00000136732.16	1	1	1	0	0	0	0	0	0	0	0
ENSG00000136717.15	2	2	3	4	4	4	1	2	1	1	1
ENSG00000163161.14	1	1	1	2	1	1	1	1	0	1	1
ENSG00000169967.17	2	2	2	2	2	2	2	2	2	2	2
ENSG00000115718.18	2	2	2	1	1	1	1	2	1	2	2
ENSG00000163166.15	1	2	1	2	2	2	1	2	1	1	1
ENSG00000072163.20	1	1	2	1	1	1	2	0	0	0	0
ENSG00000136709.12	2	2	2	2	2	2	2	3	2	2	2
ENSG00000144231.11	1	1	1	2	2	2	2	2	2	2	2
ENSG00000144233.11	1	0	0	1	1	2	1	1	0	1	0
ENSG00000136715.19	1	0	1	1	1	1	1	1	1	1	1
ENSG00000136731.13	1	1	1	1	1	1	1	1	1	2	1
ENSG00000136720.7	1	1	1	1	1	1	1	1	1	1	1
ENSG00000136699.20	1	1	0	2	1	1	3	2	3	3	3
ENSG00000152082.15	1	2	2	1	2	2	2	1	2	1	1
ENSG00000136710.10	1	1	1	1	1	1	1	1	0	1	1
ENSG00000136718.10	0	0	0	2	1	0	1	1	1	1	2
ENSG00000072135.13	1	1	1	1	1	1	1	1	1	1	1
[truncated: 12,429 more rows]
