# Supplementary material for: Comparison of Alternative Splicing Landscapes Revealed by Long-Read Sequencing in Hepatocyte-Derived HepG2 and Huh7 Cultured Cells and Human Liver Tissue
Source: Biology (Basel). 2023 Dec 6;12(12):1494. doi: 10.3390/biology12121494 (PMC10740679; doi:10.3390/biology12121494)
Supplement: Supplementary file 1 [file biology-12-01494-s001.zip › Table S4.xlsx]

## Sheet: Splice variants
Table S4. The tau-index values calculated for liver tissue, Huh7 and HepG2 cells. Mean TPM values for each transcript isoform across all samples were used for tau-index calculation.
ENSG ID	ENST ID	Tau index
ENSG00000187634.13	ENST00000616016.5	1
ENSG00000187634.13	ENST00000342066.8	1
ENSG00000187634.13	ENST00000341065.8	1
ENSG00000188976.11	ENST00000327044.7	0.782595
ENSG00000187961.15	ENST00000338591.8	0.92404
ENSG00000187583.11	ENST00000379410.8	1
ENSG00000187642.10	ENST00000694917.1	1
ENSG00000188290.11	ENST00000304952.11	0.804019
ENSG00000188290.11	ENST00000484667.2	1
ENSG00000187608.10	ENST00000624697.4	1
ENSG00000187608.10	ENST00000649529.1	0.307968
ENSG00000188157.15	ENST00000379370.7	0.901707
ENSG00000131591.18	ENST00000379339.5	1
ENSG00000131591.18	ENST00000421241.7	0.573284
ENSG00000186827.11	ENST00000379236.4	1
ENSG00000078808.19	ENST00000660930.1	0.368034
ENSG00000078808.19	ENST00000360001.12	0.474989
ENSG00000078808.19	ENST00000263741.12	1
ENSG00000176022.7	ENST00000379198.5	0.550465
ENSG00000184163.3	ENST00000330388.2	0.879615
ENSG00000160087.21	ENST00000349431.11	0.418394
ENSG00000160087.21	ENST00000347370.6	1
ENSG00000160087.21	ENST00000400929.6	1
ENSG00000162572.21	ENST00000325425.12	0.836868
ENSG00000131584.19	ENST00000354700.10	0.621325
ENSG00000169972.12	ENST00000379031.10	0.641891
ENSG00000127054.22	ENST00000540437.5	0.732722
ENSG00000127054.22	ENST00000545578.5	0.764897
ENSG00000127054.22	ENST00000620829.4	0.587508
ENSG00000127054.22	ENST00000435064.6	1
ENSG00000127054.22	ENST00000421495.6	0.868597
ENSG00000127054.22	ENST00000429572.5	0.509525
ENSG00000224051.7	ENST00000343938.9	0.476173
ENSG00000224051.7	ENST00000488011.1	1
ENSG00000169962.5	ENST00000339381.6	1
ENSG00000107404.21	ENST00000378891.9	0.821596
ENSG00000107404.21	ENST00000378888.10	0.639572
ENSG00000162576.17	ENST00000342753.8	0.818328
ENSG00000162576.17	ENST00000309212.11	0.98822
ENSG00000162576.17	ENST00000445648.5	1
ENSG00000175756.14	ENST00000338370.7	0.738691
ENSG00000175756.14	ENST00000321751.9	0.628825
ENSG00000175756.14	ENST00000338338.10	0.511849
ENSG00000175756.14	ENST00000378853.3	1
ENSG00000221978.13	ENST00000400809.8	0.817346
ENSG00000221978.13	ENST00000408918.8	1
ENSG00000242485.6	ENST00000344843.12	0.543281
ENSG00000242485.6	ENST00000492508.1	0.614139
ENSG00000235098.9	ENST00000537107.6	1
ENSG00000235098.9	ENST00000520296.5	0.94971
ENSG00000235098.9	ENST00000427211.3	1
ENSG00000205116.4	ENST00000378821.4	1
ENSG00000179403.12	ENST00000338660.5	0.216653
ENSG00000179403.12	ENST00000476993.2	0.924526
ENSG00000215915.10	ENST00000378785.7	0.792074
ENSG00000160072.20	ENST00000673477.1	0.9803
ENSG00000160072.20	ENST00000308647.8	0.965731
ENSG00000197785.14	ENST00000378756.8	0.746174
ENSG00000197785.14	ENST00000536055.6	0.697833
ENSG00000205090.9	ENST00000378733.9	1
ENSG00000205090.9	ENST00000624426.1	1
ENSG00000160075.12	ENST00000291386.4	0.421383
ENSG00000160075.12	ENST00000359060.5	0.619389
ENSG00000228594.4	ENST00000422725.4	0.797818
ENSG00000197530.13	ENST00000355826.10	0.972036
ENSG00000197530.13	ENST00000505820.7	0.650241
ENSG00000197530.13	ENST00000518681.6	1
ENSG00000197530.13	ENST00000520777.6	0.879837
ENSG00000197530.13	ENST00000504599.6	1
ENSG00000197530.13	ENST00000378708.5	1
ENSG00000197530.13	ENST00000483015.1	1
ENSG00000189409.14	ENST00000356026.10	1
ENSG00000189409.14	ENST00000479814.5	1
ENSG00000248333.9	ENST00000341832.11	0.696602
ENSG00000248333.9	ENST00000407249.7	0.674406
ENSG00000189339.12	ENST00000617444.5	1
ENSG00000189339.12	ENST00000611123.1	0.534573
ENSG00000008128.23	ENST00000404249.8	0.475244
ENSG00000008128.23	ENST00000356200.7	1
ENSG00000008128.23	ENST00000479362.1	1
ENSG00000008130.15	ENST00000341426.9	1
ENSG00000008130.15	ENST00000341991.7	0.343143
ENSG00000078369.18	ENST00000610897.4	0.858535
ENSG00000078369.18	ENST00000615252.4	0.62649
ENSG00000078369.18	ENST00000378609.9	1
ENSG00000178821.13	ENST00000378602.3	1
ENSG00000178821.13	ENST00000310991.8	0.223331
ENSG00000067606.17	ENST00000378567.8	0.947176
ENSG00000067606.17	ENST00000400921.6	1
ENSG00000067606.17	ENST00000461106.6	1
ENSG00000162585.17	ENST00000400919.7	1
ENSG00000162585.17	ENST00000378543.2	1
ENSG00000162585.17	ENST00000378546.9	0.715951
ENSG00000162585.17	ENST00000420515.1	0.591877
ENSG00000157933.10	ENST00000378536.5	0.540777
ENSG00000116151.14	ENST00000449373.2	1
ENSG00000116151.14	ENST00000494279.2	1
ENSG00000157916.20	ENST00000378513.7	1
ENSG00000157916.20	ENST00000605895.6	0.159307
ENSG00000157916.20	ENST00000378512.5	0.395489
ENSG00000157911.11	ENST00000447513.7	0.785905
ENSG00000157911.11	ENST00000507596.5	0.674989
ENSG00000157911.11	ENST00000508384.5	1
ENSG00000149527.18	ENST00000419816.6	1
ENSG00000149527.18	ENST00000278878.6	1
ENSG00000157881.16	ENST00000435556.8	0.633669
ENSG00000157873.18	ENST00000355716.5	0.68871
ENSG00000157870.17	ENST00000444521.6	1
ENSG00000157870.17	ENST00000419916.8	1
ENSG00000157870.17	ENST00000378427.6	1
ENSG00000142606.16	ENST00000471840.5	1
ENSG00000215912.12	ENST00000401095.8	0.57833
ENSG00000142611.17	ENST00000270722.10	1
ENSG00000142611.17	ENST00000463591.1	1
ENSG00000130762.15	ENST00000378378.9	0.857618
ENSG00000130762.15	ENST00000378373.5	0.868248
ENSG00000162591.16	ENST00000356575.9	1
ENSG00000162591.16	ENST00000294599.8	0.769091
ENSG00000158109.15	ENST00000378344.7	1
ENSG00000158109.15	ENST00000344579.5	0.353599
ENSG00000116213.16	ENST00000378322.7	0.646092
ENSG00000116213.16	ENST00000270708.12	1
ENSG00000078900.15	ENST00000604074.5	1
ENSG00000235169.11	ENST00000642557.4	0.95606
ENSG00000235169.11	ENST00000561886.2	1
ENSG00000235169.11	ENST00000444870.7	1
ENSG00000130764.10	ENST00000378251.3	0.474652
ENSG00000116198.14	ENST00000676052.1	0.791798
ENSG00000116198.14	ENST00000378230.8	0.539415
ENSG00000116198.14	ENST00000674623.1	1
ENSG00000116198.14	ENST00000675677.1	1
ENSG00000116198.14	ENST00000675666.1	1
ENSG00000116198.14	ENST00000674558.1	0.864564
ENSG00000116198.14	ENST00000428079.6	1
ENSG00000169598.17	ENST00000378209.8	0.932247
ENSG00000198912.12	ENST00000361605.4	0.64006
ENSG00000198912.12	ENST00000680169.1	1
ENSG00000198912.12	ENST00000680535.1	1
ENSG00000069424.16	ENST00000378097.6	1
ENSG00000069424.16	ENST00000666163.1	0.830703
ENSG00000069424.16	ENST00000671676.1	1
ENSG00000069424.16	ENST00000653262.1	1
ENSG00000069424.16	ENST00000341524.6	1
ENSG00000069424.16	ENST00000352527.6	0.858086
ENSG00000069424.16	ENST00000663169.1	0.689157
ENSG00000069424.16	ENST00000652845.1	0.722213
ENSG00000069424.16	ENST00000669250.1	1
ENSG00000116251.11	ENST00000234875.9	0.73461
ENSG00000116251.11	ENST00000497965.5	0.504859
ENSG00000116251.11	ENST00000471204.5	0.654419
ENSG00000116251.11	ENST00000465387.5	0.763455
ENSG00000158286.13	ENST00000377939.5	0.687627
ENSG00000116237.16	ENST00000343813.10	0.756526
ENSG00000158292.7	ENST00000377893.3	0.560542
ENSG00000097021.20	ENST00000608083.5	0.483581
ENSG00000097021.20	ENST00000361521.9	1
ENSG00000097021.20	ENST00000377845.7	0.914085
ENSG00000097021.20	ENST00000545482.5	1
ENSG00000069812.11	ENST00000377834.8	0.688136
ENSG00000187017.18	ENST00000645284.1	1
ENSG00000187017.18	ENST00000636330.1	0.920115
ENSG00000187017.18	ENST00000461727.6	0.877006
ENSG00000187017.18	ENST00000478323.1	0.609057
ENSG00000187017.18	ENST00000633239.1	0.456045
ENSG00000187017.18	ENST00000636644.1	1
ENSG00000187017.18	ENST00000434576.2	0.510773
ENSG00000187017.18	ENST00000477679.2	1
ENSG00000215788.11	ENST00000377782.7	1
ENSG00000171680.23	ENST00000535355.6	1
ENSG00000171680.23	ENST00000400913.6	1
ENSG00000171680.23	ENST00000377728.8	1
ENSG00000171680.23	ENST00000377740.5	1
ENSG00000162408.11	ENST00000377705.6	0.594827
ENSG00000173662.21	ENST00000333172.11	1
ENSG00000173662.21	ENST00000351136.7	1
ENSG00000204859.13	ENST00000377674.9	0.64187
ENSG00000162413.17	ENST00000377658.8	0.738148
ENSG00000162413.17	ENST00000377663.3	1
ENSG00000116273.6	ENST00000377648.5	0.538414
ENSG00000041988.16	ENST00000054650.9	0.464808
ENSG00000041988.16	ENST00000377627.7	0.738695
ENSG00000007923.17	ENST00000377577.10	0.771703
ENSG00000171735.19	ENST00000303635.12	1
ENSG00000171735.19	ENST00000473578.5	0.660241
ENSG00000171735.19	ENST00000495233.5	1
ENSG00000171735.19	ENST00000476864.1	1
ENSG00000049245.13	ENST00000054666.11	0.487619
ENSG00000049246.15	ENST00000361923.2	0.711466
ENSG00000049249.9	ENST00000377507.8	1
ENSG00000116288.13	ENST00000493678.5	0.373253
ENSG00000116288.13	ENST00000377493.9	0.415366
ENSG00000116288.13	ENST00000338639.10	0.824997
ENSG00000116288.13	ENST00000377491.5	0.687304
ENSG00000116285.13	ENST00000474874.5	1
ENSG00000116285.13	ENST00000377482.10	0.700775
ENSG00000142599.19	ENST00000400908.7	1
ENSG00000142599.19	ENST00000377464.5	0.520594
ENSG00000142599.19	ENST00000659924.1	0.537147
ENSG00000142599.19	ENST00000468247.1	0.605542
ENSG00000074800.16	ENST00000234590.10	0.650865
ENSG00000074800.16	ENST00000647408.1	0.643723
ENSG00000197241.4	ENST00000400906.2	1
ENSG00000180758.12	ENST00000377411.5	0.556713
ENSG00000049239.13	ENST00000377403.7	0.326263
ENSG00000171621.14	ENST00000328089.11	0.777814
ENSG00000171621.14	ENST00000357898.3	1
ENSG00000171612.7	ENST00000302692.7	0.761328
ENSG00000188807.13	ENST00000340381.11	1
ENSG00000188807.13	ENST00000340305.9	0.508621
ENSG00000188807.13	ENST00000416541.5	0.69244
ENSG00000171608.17	ENST00000377346.9	0.960737
ENSG00000171603.18	ENST00000435891.5	0.897739
ENSG00000171603.18	ENST00000361311.4	0.790705
ENSG00000178585.15	ENST00000377263.6	0.653756
ENSG00000178585.15	ENST00000400904.7	0.761121
ENSG00000178585.15	ENST00000377258.5	1
ENSG00000162441.12	ENST00000488540.5	1
ENSG00000162441.12	ENST00000377223.6	0.319246
ENSG00000162441.12	ENST00000400903.6	0.898004
ENSG00000162441.12	ENST00000377213.1	0.909995
ENSG00000173614.14	ENST00000403197.5	0.822774
ENSG00000173614.14	ENST00000377205.6	0.652643
ENSG00000173614.14	ENST00000496751.1	1
ENSG00000162444.12	ENST00000294435.8	0.827942
ENSG00000130939.20	ENST00000343090.11	0.566232
ENSG00000130939.20	ENST00000377153.5	0.907888
ENSG00000054523.20	ENST00000377093.9	0.674801
ENSG00000054523.20	ENST00000676179.1	0.21875
ENSG00000054523.20	ENST00000377086.5	0.798785
ENSG00000054523.20	ENST00000377081.5	0.333333
ENSG00000054523.20	ENST00000620295.2	0.433333
ENSG00000054523.20	ENST00000622724.3	0.618778
ENSG00000142657.21	ENST00000270776.13	0.656342
ENSG00000251503.8	ENST00000400900.6	1
ENSG00000251503.8	ENST00000470413.6	0.872867
ENSG00000175279.22	ENST00000309048.8	0.626973
ENSG00000241563.4	ENST00000377049.4	0.39125
ENSG00000160049.12	ENST00000377038.8	0.531253
ENSG00000160049.12	ENST00000377036.2	0.432707
ENSG00000142655.13	ENST00000356607.9	0.614883
ENSG00000130940.15	ENST00000377022.8	0.73039
ENSG00000130940.15	ENST00000344008.5	0.76455
ENSG00000120948.19	ENST00000240185.8	0.492922
ENSG00000120948.19	ENST00000315091.7	0.993706
ENSG00000009724.17	ENST00000400897.8	0.967663
ENSG00000009724.17	ENST00000400898.3	0.980843
ENSG00000116649.10	ENST00000376957.7	0.676035
ENSG00000171824.14	ENST00000304457.11	0.738352
ENSG00000171824.14	ENST00000376936.9	1
ENSG00000198793.13	ENST00000376838.5	0.618044
ENSG00000198793.13	ENST00000361445.9	0.968969
ENSG00000120942.14	ENST00000376810.6	0.608692
ENSG00000116661.11	ENST00000354287.5	0.634427
ENSG00000132879.14	ENST00000251546.8	0.859363
ENSG00000132879.14	ENST00000376770.5	0.744983
ENSG00000132879.14	ENST00000251547.10	0.709031
ENSG00000132879.14	ENST00000376762.8	0.681483
ENSG00000116663.11	ENST00000376753.9	0.387618
ENSG00000116663.11	ENST00000449067.1	1
ENSG00000116670.15	ENST00000376692.9	0.642684
ENSG00000116670.15	ENST00000235310.7	1
ENSG00000116670.15	ENST00000376672.5	1
ENSG00000116670.15	ENST00000456915.1	0.723142
ENSG00000177674.16	ENST00000376637.7	0.587223
ENSG00000177674.16	ENST00000376629.8	0.666591
ENSG00000177000.13	ENST00000376592.6	1
ENSG00000177000.13	ENST00000376590.9	0.433447
ENSG00000011021.23	ENST00000346436.11	0.727794
ENSG00000120937.9	ENST00000376468.4	0.996857
ENSG00000116685.16	ENST00000376572.8	0.724858
ENSG00000083444.17	ENST00000196061.5	0.826055
ENSG00000116688.18	ENST00000444836.5	0.490167
ENSG00000116688.18	ENST00000674817.1	0.786919
ENSG00000116688.18	ENST00000675053.1	1
ENSG00000116688.18	ENST00000674548.1	1
ENSG00000116688.18	ENST00000675231.1	1
ENSG00000116688.18	ENST00000675113.1	1
ENSG00000116688.18	ENST00000235329.10	0.859725
ENSG00000116688.18	ENST00000676293.1	0.809247
ENSG00000116688.18	ENST00000675919.1	0.743052
ENSG00000116691.11	ENST00000235332.6	0.532676
ENSG00000048707.15	ENST00000620676.6	0.39382
ENSG00000048707.15	ENST00000613099.4	0.998131
ENSG00000048707.15	ENST00000011700.10	0.999973
ENSG00000048707.15	ENST00000543766.2	0.581363
ENSG00000162496.9	ENST00000616661.5	0.649755
ENSG00000162496.9	ENST00000464917.5	1
ENSG00000243073.4	ENST00000235349.6	1
ENSG00000116731.23	ENST00000311066.10	0.700089
ENSG00000116731.23	ENST00000376048.9	1
ENSG00000116731.23	ENST00000413440.5	0.512197
ENSG00000116731.23	ENST00000343137.8	0.619445
ENSG00000116731.23	ENST00000505823.5	0.52696
ENSG00000189337.17	ENST00000376030.7	1
ENSG00000189337.17	ENST00000361144.9	1
ENSG00000189337.17	ENST00000400798.6	1
ENSG00000171729.14	ENST00000428417.5	0.931591
ENSG00000171729.14	ENST00000376014.7	1
ENSG00000171729.14	ENST00000400796.7	0.92983
ENSG00000142634.13	ENST00000375980.9	0.317973
ENSG00000132906.18	ENST00000333868.10	0.598337
ENSG00000132906.18	ENST00000348549.9	1
ENSG00000116138.13	ENST00000616884.4	0.515652
ENSG00000116138.13	ENST00000375847.8	1
ENSG00000116771.6	ENST00000375826.4	0.732141
ENSG00000197312.12	ENST00000480945.6	0.226962
ENSG00000116786.13	ENST00000375799.8	1
ENSG00000116786.13	ENST00000375793.2	0.763802
ENSG00000116786.13	ENST00000642363.1	0.580157
ENSG00000162461.8	ENST00000294454.6	0.734096
ENSG00000162460.7	ENST00000375782.2	0.861083
ENSG00000162458.13	ENST00000375766.8	0.71653
ENSG00000162458.13	ENST00000332305.5	1
ENSG00000233954.7	ENST00000483273.2	0.708775
ENSG00000065526.12	ENST00000375759.8	0.639534
ENSG00000116809.12	ENST00000440560.5	1
ENSG00000116809.12	ENST00000537142.5	0.477646
ENSG00000183888.4	ENST00000329454.2	1
ENSG00000142627.13	ENST00000358432.8	0.495913
ENSG00000132881.12	ENST00000375599.8	1
ENSG00000037637.11	ENST00000375592.8	0.697303
ENSG00000055070.17	ENST00000401089.3	1
ENSG00000055070.17	ENST00000492354.1	0.412564
ENSG00000187144.11	ENST00000540400.1	1
ENSG00000157191.20	ENST00000337132.10	1
ENSG00000157191.20	ENST00000443980.6	0.833326
ENSG00000219481.11	ENST00000430580.6	0.705545
ENSG00000058453.17	ENST00000375541.10	0.656015
ENSG00000058453.17	ENST00000445545.6	1
ENSG00000117122.14	ENST00000375534.7	0.981608
ENSG00000159363.19	ENST00000452699.5	0.917438
ENSG00000117118.10	ENST00000375499.8	0.172608
ENSG00000142623.11	ENST00000375471.5	1
ENSG00000179051.14	ENST00000375436.9	0.617482
ENSG00000074964.17	ENST00000361221.8	0.98685
ENSG00000074964.17	ENST00000375415.5	1
ENSG00000074964.17	ENST00000375408.7	1
ENSG00000117154.12	ENST00000251296.4	1
ENSG00000179023.9	ENST00000400664.3	0.547188
ENSG00000159423.17	ENST00000538839.5	0.574185
ENSG00000169991.11	ENST00000455833.7	0.657468
ENSG00000127481.15	ENST00000375225.7	0.899488
ENSG00000127481.15	ENST00000375254.8	0.999908
ENSG00000127481.15	ENST00000375224.1	0.663894
ENSG00000127481.15	ENST00000425413.5	1
ENSG00000127481.15	ENST00000417040.1	1
ENSG00000127463.16	ENST00000477853.6	0.799864
ENSG00000127463.16	ENST00000688219.1	1
ENSG00000127463.16	ENST00000690732.1	1
ENSG00000127463.16	ENST00000690823.1	0.849816
ENSG00000127463.16	ENST00000375199.7	1
ENSG00000127463.16	ENST00000375208.7	0.703666
ENSG00000053372.5	ENST00000330263.5	0.712418
ENSG00000162482.5	ENST00000361640.5	0.998924
ENSG00000053371.13	ENST00000235835.8	0.386883
ENSG00000053371.13	ENST00000330072.9	1
ENSG00000040487.13	ENST00000375153.8	1
ENSG00000040487.13	ENST00000375155.7	1
ENSG00000040487.13	ENST00000400548.6	1
ENSG00000077549.19	ENST00000264202.8	0.428178
ENSG00000077549.19	ENST00000375142.5	0.511497
ENSG00000077549.19	ENST00000674432.1	0.285213
ENSG00000077549.19	ENST00000674278.1	1
ENSG00000173436.15	ENST00000617872.4	1
ENSG00000173436.15	ENST00000322753.7	0.880628
ENSG00000158747.15	ENST00000375136.8	1
ENSG00000158747.15	ENST00000548815.2	0.515215
ENSG00000162542.14	ENST00000294543.11	1
ENSG00000178828.7	ENST00000375121.4	1
ENSG00000169914.6	ENST00000375120.4	0.605144
ENSG00000188784.4	ENST00000375116.3	1
ENSG00000188257.12	ENST00000400520.8	1
ENSG00000188257.12	ENST00000649436.1	0.79637
ENSG00000127472.11	ENST00000375108.4	1
ENSG00000162543.6	ENST00000375099.4	0.52695
ENSG00000162545.6	ENST00000375078.4	0.790668
ENSG00000090432.7	ENST00000264198.5	0.65441
ENSG00000183114.8	ENST00000332947.6	0.958763
ENSG00000158825.6	ENST00000375071.4	1
ENSG00000158828.8	ENST00000321556.5	0.73674
ENSG00000244038.11	ENST00000602624.7	0.724308
ENSG00000127483.19	ENST00000438032.6	1
ENSG00000127483.19	ENST00000312239.10	0.468618
ENSG00000127483.19	ENST00000375003.6	0.55393
ENSG00000075151.24	ENST00000374935.7	1
ENSG00000075151.24	ENST00000264211.13	0.247388
ENSG00000075151.24	ENST00000685872.1	0.660457
ENSG00000075151.24	ENST00000602326.6	0.906666
ENSG00000075151.24	ENST00000686579.1	1
ENSG00000075151.24	ENST00000688741.1	1
ENSG00000075151.24	ENST00000682284.1	1
ENSG00000117298.16	ENST00000374893.11	0.498972
ENSG00000142794.19	ENST00000318249.10	1
ENSG00000142794.19	ENST00000342104.9	0.570329
ENSG00000162551.14	ENST00000374840.8	1
ENSG00000162551.14	ENST00000539907.5	0.649258
ENSG00000162551.14	ENST00000540617.5	1
ENSG00000076864.21	ENST00000374765.9	1
ENSG00000076864.21	ENST00000542643.6	1
ENSG00000090686.16	ENST00000308271.14	0.403416
ENSG00000090686.16	ENST00000400301.5	1
ENSG00000090686.16	ENST00000374732.7	0.751502
ENSG00000090686.16	ENST00000421625.6	0.654024
ENSG00000142798.20	ENST00000374695.8	0.919809
ENSG00000289694.1	ENST00000695856.1	0.483661
ENSG00000070831.18	ENST00000400259.5	0.809237
ENSG00000070831.18	ENST00000344548.8	0.415209
ENSG00000070831.18	ENST00000411827.2	0.753241
ENSG00000070831.18	ENST00000695858.1	0.520484
ENSG00000070831.18	ENST00000315554.14	1
ENSG00000070831.18	ENST00000656825.1	0.404762
ENSG00000070831.18	ENST00000695796.1	1
ENSG00000070831.18	ENST00000695797.1	0.492625
ENSG00000070831.18	ENST00000695798.1	0.366601
ENSG00000070831.18	ENST00000695802.1	0.834521
ENSG00000162552.15	ENST00000290167.11	1
ENSG00000184677.18	ENST00000375647.5	0.99999
ENSG00000184677.18	ENST00000404138.5	0.166667
ENSG00000184677.18	ENST00000374651.8	0.691271
ENSG00000173372.18	ENST00000374642.8	1
ENSG00000173372.18	ENST00000438241.2	1
ENSG00000159189.13	ENST00000374640.9	1
ENSG00000159189.13	ENST00000374639.7	1
ENSG00000159189.13	ENST00000374637.1	1
ENSG00000173369.18	ENST00000695760.1	1
ENSG00000173369.18	ENST00000695762.1	1
ENSG00000173369.18	ENST00000509305.6	1
ENSG00000133216.17	ENST00000374630.8	1
ENSG00000133216.17	ENST00000400191.7	1
ENSG00000215906.9	ENST00000426928.7	1
ENSG00000004487.18	ENST00000692975.1	1
ENSG00000004487.18	ENST00000691682.1	0.908691
ENSG00000004487.18	ENST00000691404.1	0.762621
ENSG00000004487.18	ENST00000465864.2	1
ENSG00000004487.18	ENST00000690627.1	1
ENSG00000004487.18	ENST00000686771.1	1
ENSG00000004487.18	ENST00000356634.7	0.930392
ENSG00000004487.18	ENST00000400181.9	0.650125
ENSG00000004487.18	ENST00000685243.1	0.929532
ENSG00000169641.14	ENST00000302291.8	0.521197
ENSG00000179546.5	ENST00000374619.2	1
ENSG00000125944.21	ENST00000302271.11	0.712425
ENSG00000125944.21	ENST00000478691.5	0.497266
ENSG00000125944.21	ENST00000374616.7	0.806804
ENSG00000125945.15	ENST00000314011.9	0.674253
ENSG00000125945.15	ENST00000374608.3	0.717847
ENSG00000204219.11	ENST00000450454.7	0.537126
ENSG00000204219.11	ENST00000476978.2	0.921408
ENSG00000088280.20	ENST00000495646.5	0.699462
ENSG00000088280.20	ENST00000336689.8	0.956433
ENSG00000007968.7	ENST00000361729.3	0.653669
ENSG00000117318.9	ENST00000374561.6	0.735551
ENSG00000142676.14	ENST00000374550.8	0.67092
ENSG00000142676.14	ENST00000643754.2	1
ENSG00000142676.14	ENST00000458455.2	1
ENSG00000057757.10	ENST00000246151.9	0.434413
ENSG00000057757.10	ENST00000374524.1	1
ENSG00000011009.11	ENST00000374514.8	0.649075
ENSG00000117308.15	ENST00000617979.5	1
ENSG00000117308.15	ENST00000374497.7	0.755532
ENSG00000117308.15	ENST00000456977.5	0.592098
ENSG00000117305.15	ENST00000374490.8	0.720978
ENSG00000117305.15	ENST00000436439.6	1
ENSG00000117305.15	ENST00000235958.4	1
ENSG00000179163.12	ENST00000374479.4	0.235443
ENSG00000189266.13	ENST00000334351.8	0.604257
ENSG00000188529.15	ENST00000492112.3	0.653967
ENSG00000188529.15	ENST00000344989.10	0.90217
ENSG00000188529.15	ENST00000453840.7	0.57099
ENSG00000188529.15	ENST00000343255.9	0.443016
ENSG00000142661.19	ENST00000338909.9	1
ENSG00000142661.19	ENST00000374434.4	1
ENSG00000142677.4	ENST00000270800.2	0.870012
ENSG00000185436.12	ENST00000327535.6	0.688304
ENSG00000185436.12	ENST00000374418.3	1
ENSG00000158055.17	ENST00000690803.1	1
ENSG00000001460.18	ENST00000003583.12	0.720275
ENSG00000001461.17	ENST00000374399.9	0.818301
ENSG00000001461.17	ENST00000339255.2	1
ENSG00000117602.13	ENST00000538532.6	1
ENSG00000117602.13	ENST00000618490.4	1
ENSG00000117602.13	ENST00000374395.9	0.658985
ENSG00000117602.13	ENST00000436717.6	1
ENSG00000184454.7	ENST00000374392.3	0.491517
ENSG00000133226.18	ENST00000323848.14	0.479309
ENSG00000169504.15	ENST00000374379.9	0.371465
ENSG00000020633.19	ENST00000308873.11	1
ENSG00000020633.19	ENST00000338888.3	1
ENSG00000117614.10	ENST00000236273.9	0.468622
ENSG00000117616.18	ENST00000243189.12	0.577817
ENSG00000187010.21	ENST00000328664.9	1
ENSG00000183726.11	ENST00000374358.5	0.459552
ENSG00000188672.19	ENST00000294413.13	1
ENSG00000204178.11	ENST00000399766.7	0.792667
ENSG00000204178.11	ENST00000374343.5	0.160025
ENSG00000157978.12	ENST00000374338.5	0.264645
ENSG00000117643.15	ENST00000611903.4	0.835945
ENSG00000117643.15	ENST00000263979.7	1
ENSG00000117643.15	ENST00000374329.1	1
ENSG00000162430.18	ENST00000374315.1	0.499083
ENSG00000117640.18	ENST00000474295.5	0.510224
ENSG00000117640.18	ENST00000374303.7	0.618959
ENSG00000117640.18	ENST00000374307.9	0.866493
ENSG00000117640.18	ENST00000374301.7	1
ENSG00000127423.11	ENST00000538789.5	1
ENSG00000127423.11	ENST00000374298.4	0.608294
ENSG00000182749.6	ENST00000675840.1	0.837611
ENSG00000117632.23	ENST00000455785.7	0.863655
ENSG00000117632.23	ENST00000357865.6	0.564186
ENSG00000158006.14	ENST00000374282.8	0.2762
ENSG00000158006.14	ENST00000374284.5	1
ENSG00000158008.10	ENST00000374280.4	1
ENSG00000175087.10	ENST00000374269.2	0.497119
ENSG00000142684.9	ENST00000374266.7	0.454407
ENSG00000130695.16	ENST00000451429.8	1
ENSG00000130695.16	ENST00000453146.1	0.533578
ENSG00000142669.15	ENST00000270792.10	0.70648
ENSG00000158062.21	ENST00000357089.8	0.96039
ENSG00000158062.21	ENST00000374217.7	1
ENSG00000169442.9	ENST00000374213.3	0.85261
ENSG00000176092.17	ENST00000308182.10	0.974113
ENSG00000176083.18	ENST00000349618.8	1
ENSG00000117682.17	ENST00000427245.6	1
ENSG00000117682.17	ENST00000526219.5	0.774206
ENSG00000117682.17	ENST00000374185.7	0.600431
ENSG00000117682.17	ENST00000360009.6	0.523756
ENSG00000117682.17	ENST00000436153.6	1
ENSG00000117682.17	ENST00000431933.5	1
ENSG00000198830.11	ENST00000361427.6	0.603429
ENSG00000198830.11	ENST00000619352.4	0.654338
ENSG00000117676.14	ENST00000374166.8	1
ENSG00000117676.14	ENST00000530003.5	0.768449
ENSG00000117713.21	ENST00000324856.13	0.7
ENSG00000117713.21	ENST00000636219.1	0.331743
ENSG00000060642.12	ENST00000686194.1	0.756195
ENSG00000060642.12	ENST00000674335.1	1
ENSG00000060642.12	ENST00000693629.1	1
ENSG00000060642.12	ENST00000686655.1	0.541672
ENSG00000060642.12	ENST00000688730.1	0.264841
ENSG00000060642.12	ENST00000688522.1	0.623715
ENSG00000060642.12	ENST00000691454.1	1
ENSG00000060642.12	ENST00000686325.1	1
ENSG00000060642.12	ENST00000674222.1	1
ENSG00000060642.12	ENST00000691135.1	1
ENSG00000060642.12	ENST00000374145.6	1
ENSG00000060642.12	ENST00000674273.1	1
ENSG00000060642.12	ENST00000078527.9	1
ENSG00000204160.12	ENST00000374142.9	0.501802
ENSG00000175793.12	ENST00000339276.6	0.724435
ENSG00000142751.15	ENST00000374135.9	0.670852
ENSG00000142751.15	ENST00000374133.3	0.907935
ENSG00000198746.13	ENST00000445019.5	1
ENSG00000198746.13	ENST00000361720.10	0.54944
ENSG00000090273.14	ENST00000321265.10	0.618173
ENSG00000131910.5	ENST00000254227.4	0.868961
ENSG00000175707.10	ENST00000320567.6	0.829336
ENSG00000253368.4	ENST00000522111.3	0.842503
ENSG00000158246.8	ENST00000289166.6	0.951571
ENSG00000090020.11	ENST00000263980.8	1
ENSG00000142784.16	ENST00000319394.8	0.966366
ENSG00000142784.16	ENST00000361771.7	0.254694
ENSG00000186501.15	ENST00000374076.9	1
ENSG00000186501.15	ENST00000608611.5	0.636794
ENSG00000142765.18	ENST00000618673.4	1
ENSG00000142765.18	ENST00000318074.9	0.693416
ENSG00000142733.17	ENST00000486046.5	0.831108
ENSG00000142733.17	ENST00000374040.7	1
ENSG00000142748.13	ENST00000354982.2	1
ENSG00000181773.7	ENST00000374024.4	1
ENSG00000158195.11	ENST00000618852.5	0.631996
ENSG00000126705.15	ENST00000673934.1	1
ENSG00000126705.15	ENST00000644989.1	0.56161
ENSG00000126705.15	ENST00000642416.1	1
ENSG00000126709.16	ENST00000361157.11	0.593269
ENSG00000009780.16	ENST00000373954.11	0.541094
ENSG00000009780.16	ENST00000419687.6	0.653612
ENSG00000009780.16	ENST00000373949.5	0.620865
ENSG00000009780.16	ENST00000446647.1	1
ENSG00000117758.14	ENST00000373943.9	0.686534
ENSG00000117751.18	ENST00000311772.10	0.460985
ENSG00000130775.16	ENST00000373925.5	0.811538
ENSG00000130775.16	ENST00000373927.7	1
ENSG00000117748.10	ENST00000373912.8	0.708743
ENSG00000130768.15	ENST00000373894.8	1
ENSG00000130768.15	ENST00000373888.8	1
ENSG00000130768.15	ENST00000549094.1	0.89149
ENSG00000158156.9	ENST00000675759.1	0.829705
ENSG00000158156.9	ENST00000373884.6	0.447608
ENSG00000158161.16	ENST00000540618.5	0.438647
ENSG00000169403.12	ENST00000373857.8	0.733103
ENSG00000126698.11	ENST00000263697.6	0.241451
ENSG00000130770.18	ENST00000497986.5	0.796195
ENSG00000130770.18	ENST00000335514.10	0.365833
ENSG00000130770.18	ENST00000468425.2	0.836287
ENSG00000130770.18	ENST00000465645.1	0.277003
ENSG00000130766.5	ENST00000253063.4	0.630479
ENSG00000130772.14	ENST00000373842.9	0.488002
ENSG00000204138.13	ENST00000373839.8	0.856767
ENSG00000180198.17	ENST00000398958.6	0.817516
ENSG00000180198.17	ENST00000683442.1	1
ENSG00000180198.17	ENST00000373832.5	0.700013
ENSG00000120656.14	ENST00000685589.1	1
ENSG00000120656.14	ENST00000689843.1	0.700815
ENSG00000120656.14	ENST00000685312.1	1
ENSG00000120656.14	ENST00000263974.4	1
ENSG00000188060.8	ENST00000373826.3	1
ENSG00000188060.8	ENST00000465518.3	1
ENSG00000162419.13	ENST00000373816.6	0.607875
ENSG00000198492.16	ENST00000373812.8	1
ENSG00000198492.16	ENST00000541996.5	0.461468
ENSG00000116329.12	ENST00000234961.7	1
ENSG00000159023.22	ENST00000647103.1	0.966405
ENSG00000159023.22	ENST00000343067.9	1
ENSG00000253304.2	ENST00000521452.2	0.653282
ENSG00000116350.18	ENST00000373795.7	0.525986
ENSG00000116353.16	ENST00000373791.7	0.763217
ENSG00000060656.20	ENST00000428026.6	0.847523
ENSG00000060656.20	ENST00000460170.2	1
ENSG00000162511.8	ENST00000294507.4	0.91276
ENSG00000162512.16	ENST00000339394.7	0.304416
ENSG00000162512.16	ENST00000336798.11	1
ENSG00000134644.16	ENST00000424085.6	0.81483
ENSG00000134644.16	ENST00000257075.9	1
ENSG00000134644.16	ENST00000373747.7	1
ENSG00000084628.10	ENST00000373736.7	0.918968
ENSG00000060688.13	ENST00000263694.9	0.703122
ENSG00000121766.16	ENST00000618216.4	0.561285
ENSG00000121766.16	ENST00000616393.4	1
ENSG00000121766.16	ENST00000616859.4	1
ENSG00000121766.16	ENST00000344147.10	0.756827
ENSG00000121769.8	ENST00000373713.7	0.823843
ENSG00000168528.12	ENST00000373709.8	0.267788
ENSG00000142910.16	ENST00000457433.6	1
ENSG00000142910.16	ENST00000537531.2	0.561503
ENSG00000162517.13	ENST00000373703.5	0.399596
ENSG00000084636.18	ENST00000373672.8	1
ENSG00000084636.18	ENST00000373668.7	1
ENSG00000184007.22	ENST00000602725.5	0.735226
ENSG00000184007.22	ENST00000647444.2	0.500198
ENSG00000184007.22	ENST00000457805.6	0.912312
ENSG00000184007.22	ENST00000602683.5	0.694398
ENSG00000121774.18	ENST00000327300.12	0.511575
ENSG00000025800.14	ENST00000373625.8	0.479665
ENSG00000084652.16	ENST00000373610.8	0.403365
ENSG00000160050.16	ENST00000373602.10	1
ENSG00000160050.16	ENST00000421922.6	0.833591
ENSG00000160051.12	ENST00000291358.11	1
ENSG00000160055.20	ENST00000344461.7	0.794818
ENSG00000160055.20	ENST00000309777.11	0.552687
ENSG00000084623.12	ENST00000677760.1	0.589785
ENSG00000084623.12	ENST00000676801.1	1
ENSG00000084623.12	ENST00000677202.1	0.574575
ENSG00000084623.12	ENST00000373586.2	1
ENSG00000084623.12	ENST00000677378.1	0.518978
ENSG00000084623.12	ENST00000679290.1	0.89403
ENSG00000084623.12	ENST00000677711.2	0.695391
ENSG00000084623.12	ENST00000678968.1	0.784846
ENSG00000084623.12	ENST00000677198.1	1
ENSG00000084623.12	ENST00000678711.1	1
ENSG00000084623.12	ENST00000677353.1	0.91634
ENSG00000183615.6	ENST00000373582.4	0.830047
ENSG00000182866.17	ENST00000336890.10	0.883245
ENSG00000116478.12	ENST00000373548.8	0.582001
ENSG00000175130.7	ENST00000329421.8	0.574133
ENSG00000225828.2	ENST00000432622.2	0.721631
ENSG00000160058.19	ENST00000455895.7	1
ENSG00000160058.19	ENST00000341071.11	1
ENSG00000160062.15	ENST00000373510.9	0.621104
ENSG00000160062.15	ENST00000316459.4	1
ENSG00000176261.16	ENST00000468695.6	0.621588
ENSG00000176261.16	ENST00000373501.6	0.750359
ENSG00000176261.16	ENST00000436661.6	0.829365
ENSG00000162521.19	ENST00000373493.10	0.607987
ENSG00000162520.15	ENST00000409190.8	0.505514
ENSG00000162522.11	ENST00000401073.7	0.66446
ENSG00000162522.11	ENST00000373481.7	0.887505
ENSG00000162522.11	ENST00000373480.1	1
ENSG00000134684.13	ENST00000373477.9	0.892395
ENSG00000116497.18	ENST00000373475.10	0.715684
ENSG00000160097.20	ENST00000649537.2	1
ENSG00000160097.20	ENST00000496770.1	1
ENSG00000121900.19	ENST00000329151.5	1
ENSG00000121900.19	ENST00000373463.8	0.900836
ENSG00000116514.17	ENST00000373456.11	0.690362
ENSG00000004455.18	ENST00000373449.7	0.511835
ENSG00000004455.18	ENST00000672715.1	0.178928
ENSG00000004455.18	ENST00000480134.5	0.634647
ENSG00000004455.18	ENST00000487289.1	1
ENSG00000116525.14	ENST00000291416.10	0.718368
ENSG00000160094.15	ENST00000373428.5	0.701229
ENSG00000134686.20	ENST00000373418.7	0.975737
ENSG00000134686.20	ENST00000431992.6	1
ENSG00000121903.15	ENST00000361328.7	1
ENSG00000121903.15	ENST00000684572.1	0.808481
ENSG00000163866.9	ENST00000521580.3	0.459829
ENSG00000163866.9	ENST00000446026.1	0.337077
ENSG00000163866.9	ENST00000456842.1	0.302493
ENSG00000188910.8	ENST00000373362.3	1
ENSG00000187513.9	ENST00000342280.5	1
ENSG00000116544.12	ENST00000235180.4	1
ENSG00000243749.1	ENST00000373337.3	0.191819
ENSG00000163867.17	ENST00000357182.9	0.799098
ENSG00000197056.11	ENST00000359858.9	1
ENSG00000116560.12	ENST00000357214.6	0.630689
ENSG00000146463.12	ENST00000314607.11	0.861513
ENSG00000146463.12	ENST00000457946.1	0.657522
ENSG00000142687.18	ENST00000325722.8	0.522941
ENSG00000020129.16	ENST00000356090.8	0.654312
ENSG00000020129.16	ENST00000423723.1	1
ENSG00000116819.9	ENST00000373235.4	1
ENSG00000126067.12	ENST00000373237.4	0.593208
ENSG00000142686.8	ENST00000270815.5	0.912749
ENSG00000092853.14	ENST00000251195.9	1
ENSG00000092853.14	ENST00000318121.8	0.847512
ENSG00000092853.14	ENST00000373220.7	1
ENSG00000092853.14	ENST00000520551.1	1
ENSG00000134698.11	ENST00000373210.4	0.374801
ENSG00000092847.13	ENST00000674304.1	0.488388
ENSG00000092847.13	ENST00000373204.6	0.827464
ENSG00000092847.13	ENST00000674426.1	0.827464
ENSG00000126070.20	ENST00000324350.9	1
ENSG00000126070.20	ENST00000397828.3	0.836133
ENSG00000126070.20	ENST00000373191.9	0.466388
ENSG00000126070.20	ENST00000246314.10	0.928971
ENSG00000116863.11	ENST00000373178.5	0.526647
ENSG00000171812.13	ENST00000303143.9	0.70305
ENSG00000171812.13	ENST00000481785.1	1
ENSG00000054116.12	ENST00000616074.4	1
ENSG00000054116.12	ENST00000373166.8	0.433409
ENSG00000054116.12	ENST00000373163.5	0.933635
ENSG00000054116.12	ENST00000373162.5	0.873368
ENSG00000116871.16	ENST00000373150.8	0.750234
ENSG00000054118.15	ENST00000648638.1	1
ENSG00000054118.15	ENST00000354618.10	0.516171
ENSG00000214193.11	ENST00000453908.8	1
ENSG00000214193.11	ENST00000505871.7	0.952649
ENSG00000142694.7	ENST00000490466.2	0.45448
ENSG00000196182.11	ENST00000359297.6	1
ENSG00000196182.11	ENST00000373130.7	0.799432
ENSG00000196182.11	ENST00000373132.4	0.671707
ENSG00000181817.6	ENST00000315732.3	0.465327
ENSG00000116885.18	ENST00000433045.6	1
ENSG00000116885.18	ENST00000354267.3	1
ENSG00000116898.12	ENST00000373116.6	0.384101
ENSG00000119535.18	ENST00000373106.6	1
ENSG00000119535.18	ENST00000373103.5	1
ENSG00000119535.18	ENST00000361632.8	0.907314
ENSG00000119535.18	ENST00000464465.6	0.888735
ENSG00000163873.10	ENST00000373091.8	1
ENSG00000163874.11	ENST00000373087.7	0.634881
ENSG00000163875.16	ENST00000296214.10	1
ENSG00000163875.16	ENST00000373075.6	0.533847
ENSG00000163877.11	ENST00000296215.8	0.601893
ENSG00000163879.11	ENST00000652629.1	0.745092
ENSG00000134697.13	ENST00000373062.8	0.709238
ENSG00000116922.15	ENST00000358011.8	0.623556
ENSG00000134690.11	ENST00000327331.2	0.742865
ENSG00000185090.15	ENST00000373045.11	1
ENSG00000185090.15	ENST00000397631.7	0.757524
ENSG00000185090.15	ENST00000329006.5	0.867203
ENSG00000196449.4	ENST00000373044.3	0.678246
ENSG00000197982.14	ENST00000468084.1	0.633618
ENSG00000197982.14	ENST00000373042.5	0.85509
ENSG00000188786.10	ENST00000373036.5	0.753773
ENSG00000204084.13	ENST00000373027.5	0.488898
ENSG00000204084.13	ENST00000373026.5	1
ENSG00000183431.12	ENST00000373019.5	0.511036
ENSG00000183520.12	ENST00000373014.5	0.461683
ENSG00000116954.8	ENST00000373001.4	0.514001
ENSG00000214114.9	ENST00000397572.5	0.464467
ENSG00000214114.9	ENST00000494695.4	0.528818
ENSG00000274944.4	ENST00000621281.1	0.749072
ENSG00000158315.11	ENST00000372990.6	1
ENSG00000158315.11	ENST00000540558.1	1
ENSG00000174574.16	ENST00000432648.8	0.741072
ENSG00000168653.11	ENST00000372967.3	1
ENSG00000168653.11	ENST00000372969.8	0.38464
ENSG00000127603.32	ENST00000361689.7	0.654977
ENSG00000127603.32	ENST00000567887.5	0.572021
ENSG00000127603.32	ENST00000372915.8	0.35479
ENSG00000127603.32	ENST00000564288.6	0.556571
ENSG00000127603.32	ENST00000602528.2	1
ENSG00000127603.32	ENST00000671089.2	0.999585
ENSG00000127603.32	ENST00000372925.6	0.999935
ENSG00000127603.32	ENST00000530275.3	1
ENSG00000127603.32	ENST00000360115.8	0.62461
ENSG00000127603.32	ENST00000446276.5	0.611468
ENSG00000127603.32	ENST00000442046.5	0.96167
ENSG00000183682.8	ENST00000331593.6	1
ENSG00000090621.15	ENST00000676859.1	0.791229
ENSG00000090621.15	ENST00000527718.2	0.675521
ENSG00000090621.15	ENST00000372862.7	0.749416
ENSG00000090621.15	ENST00000372857.7	0.783994
ENSG00000090621.15	ENST00000372856.7	1
ENSG00000090621.15	ENST00000372858.8	0.608596
ENSG00000163909.8	ENST00000372852.4	0.688648
ENSG00000084072.17	ENST00000324379.10	0.882312
ENSG00000084072.17	ENST00000356511.6	0.693027
ENSG00000084072.17	ENST00000372830.5	0.950779
ENSG00000116985.12	ENST00000372827.8	0.874813
ENSG00000198754.5	ENST00000327582.5	1
ENSG00000043514.17	ENST00000441669.6	0.716392
ENSG00000116990.11	ENST00000397332.2	0.315738
ENSG00000116990.11	ENST00000372815.1	0.715559
ENSG00000168389.18	ENST00000420632.6	0.982845
ENSG00000131236.18	ENST00000372792.7	1
ENSG00000131236.18	ENST00000372805.8	0.913245
ENSG00000131236.18	ENST00000340450.7	0.618105
ENSG00000131238.18	ENST00000641471.1	0.753179
ENSG00000131238.18	ENST00000530076.6	0.762415
ENSG00000131238.18	ENST00000642050.2	0.873576
ENSG00000131238.18	ENST00000641083.1	1
ENSG00000131238.18	ENST00000433473.8	0.941741
ENSG00000117000.9	ENST00000372771.5	0.500124
ENSG00000084073.10	ENST00000372759.4	0.43182
ENSG00000049089.15	ENST00000372748.8	0.75289
ENSG00000084070.12	ENST00000372718.8	0.913951
ENSG00000084070.12	ENST00000372708.5	0.524099
ENSG00000187801.15	ENST00000484445.5	1
ENSG00000187815.10	ENST00000372706.6	1
ENSG00000187815.10	ENST00000372705.3	1
ENSG00000164002.12	ENST00000296380.9	0.761888
ENSG00000164002.12	ENST00000682383.1	1
ENSG00000164002.12	ENST00000432259.6	1
ENSG00000164002.12	ENST00000418186.2	1
ENSG00000164002.12	ENST00000443729.6	1
ENSG00000117010.17	ENST00000372699.8	0.510098
ENSG00000117010.17	ENST00000372696.3	0.581222
ENSG00000117016.10	ENST00000372684.8	1
ENSG00000117016.10	ENST00000372683.1	1
ENSG00000066136.21	ENST00000447388.8	0.556265
ENSG00000066136.21	ENST00000425457.6	1
ENSG00000066136.21	ENST00000456393.6	0.466812
ENSG00000066136.21	ENST00000372654.5	1
ENSG00000066136.21	ENST00000372652.5	0.914011
ENSG00000066136.21	ENST00000308733.9	0.697021
ENSG00000179862.7	ENST00000372638.4	0.777311
ENSG00000171793.17	ENST00000650070.2	0.573897
ENSG00000171793.17	ENST00000649864.1	1
ENSG00000171793.17	ENST00000463285.7	1
ENSG00000171793.17	ENST00000649124.2	0.915876
ENSG00000171793.17	ENST00000470271.6	1
ENSG00000171793.17	ENST00000649215.1	1
ENSG00000171790.16	ENST00000359345.5	1
ENSG00000010803.17	ENST00000372595.5	0.545671
ENSG00000010803.17	ENST00000337495.9	0.870165
ENSG00000010803.17	ENST00000372597.5	1
ENSG00000010803.17	ENST00000695335.1	1
ENSG00000010803.17	ENST00000472037.5	1
ENSG00000044012.4	ENST00000372581.2	1
ENSG00000197273.4	ENST00000357001.3	1
ENSG00000198815.9	ENST00000372571.5	0.54838
ENSG00000198815.9	ENST00000372573.5	1
ENSG00000198815.9	ENST00000361776.5	0.630233
ENSG00000177181.15	ENST00000431473.4	1
ENSG00000127125.9	ENST00000372561.4	1
ENSG00000127125.9	ENST00000372556.3	0.712991
ENSG00000186409.19	ENST00000655845.1	1
ENSG00000171960.12	ENST00000677900.1	1
ENSG00000171960.12	ENST00000372550.6	1
ENSG00000171960.12	ENST00000676675.1	0.529862
ENSG00000171960.12	ENST00000304979.8	0.613159
ENSG00000171960.12	ENST00000678333.1	1
ENSG00000171960.12	ENST00000677356.1	1
ENSG00000065978.19	ENST00000321358.12	0.857096
ENSG00000065978.19	ENST00000436427.1	0.902782
ENSG00000164007.11	ENST00000539749.5	1
ENSG00000164007.11	ENST00000372539.3	0.831535
ENSG00000117385.16	ENST00000397054.7	1
ENSG00000117385.16	ENST00000296388.10	0.629268
ENSG00000117385.16	ENST00000236040.8	0.898318
ENSG00000117385.16	ENST00000372526.2	1
ENSG00000164008.17	ENST00000372525.7	1
ENSG00000177868.12	ENST00000372521.9	0.711353
ENSG00000164010.15	ENST00000645239.1	1
ENSG00000164010.15	ENST00000372514.7	1
ENSG00000164011.18	ENST00000372508.7	0.78254
ENSG00000164011.18	ENST00000651192.1	1
ENSG00000164011.18	ENST00000372507.5	1
ENSG00000164011.18	ENST00000630961.1	1
ENSG00000117394.24	ENST00000426263.10	0.991215
ENSG00000117394.24	ENST00000460369.3	1
ENSG00000186973.11	ENST00000410048.5	0.695539
ENSG00000117395.13	ENST00000236051.3	0.524634
ENSG00000253313.6	ENST00000523677.6	0.631976
ENSG00000066056.14	ENST00000372476.8	0.926618
ENSG00000117399.14	ENST00000310955.11	0.752821
ENSG00000066322.15	ENST00000413844.3	0.707278
ENSG00000066322.15	ENST00000372458.8	0.603582
ENSG00000159479.17	ENST00000372457.9	0.561179
ENSG00000159479.17	ENST00000372455.4	0.750887
ENSG00000198198.17	ENST00000372450.8	0.723142
ENSG00000198198.17	ENST00000562955.2	0.999884
ENSG00000198198.17	ENST00000634258.3	0.656636
ENSG00000178922.18	ENST00000372430.9	0.765855
ENSG00000178922.18	ENST00000583037.5	1
ENSG00000178922.18	ENST00000372433.5	1
ENSG00000178922.18	ENST00000372434.5	0.900992
ENSG00000178922.18	ENST00000372432.5	0.951039
ENSG00000142949.17	ENST00000359947.9	0.976157
ENSG00000142949.17	ENST00000429895.5	0.951337
ENSG00000142949.17	ENST00000372407.4	0.671825
ENSG00000066135.13	ENST00000372396.4	0.600831
ENSG00000126091.21	ENST00000361400.9	1
ENSG00000126091.21	ENST00000545417.5	1
ENSG00000126091.21	ENST00000330208.6	1
ENSG00000126091.21	ENST00000642331.1	1
ENSG00000126091.21	ENST00000347631.8	1
ENSG00000126091.21	ENST00000361392.9	1
ENSG00000126091.21	ENST00000646971.1	1
ENSG00000126091.21	ENST00000484868.2	1
ENSG00000126091.21	ENST00000361746.9	1
ENSG00000126091.21	ENST00000533933.6	1
ENSG00000117407.17	ENST00000498139.6	0.695936
ENSG00000117407.17	ENST00000438616.3	1
ENSG00000117408.11	ENST00000372343.8	0.424363
ENSG00000117408.11	ENST00000372339.3	1
ENSG00000132768.14	ENST00000255108.8	1
ENSG00000132768.14	ENST00000396758.6	0.938438
ENSG00000117410.14	ENST00000532642.5	0.38286
ENSG00000117410.14	ENST00000236067.8	0.535589
ENSG00000117410.14	ENST00000472174.7	0.6628
ENSG00000117411.18	ENST00000372324.6	1
ENSG00000117411.18	ENST00000481924.2	0.408729
ENSG00000117411.18	ENST00000356836.10	0.923006
ENSG00000117411.18	ENST00000309519.8	0.673782
ENSG00000159214.13	ENST00000372318.8	0.74905
ENSG00000196517.13	ENST00000372310.8	1
ENSG00000196517.13	ENST00000673836.1	0.934031
ENSG00000178028.14	ENST00000361745.10	0.636154
ENSG00000178028.14	ENST00000372289.7	1
ENSG00000178028.14	ENST00000315913.9	0.790011
ENSG00000117419.16	ENST00000456170.6	0.735249
ENSG00000117419.16	ENST00000372257.7	0.602863
ENSG00000187147.18	ENST00000355387.6	1
ENSG00000187147.18	ENST00000361799.7	0.849573
ENSG00000187147.18	ENST00000372247.6	0.572532
ENSG00000126106.14	ENST00000372244.3	0.69277
ENSG00000126106.14	ENST00000372237.8	0.514388
ENSG00000126106.14	ENST00000372235.7	0.290217
ENSG00000198520.12	ENST00000535358.6	1
ENSG00000142945.13	ENST00000372224.9	0.687021
ENSG00000142937.12	ENST00000396651.8	0.72478
ENSG00000142937.12	ENST00000372209.3	0.685435
ENSG00000142959.5	ENST00000372207.4	1
ENSG00000173846.13	ENST00000372201.5	0.769149
ENSG00000188396.4	ENST00000339355.3	1
ENSG00000188396.4	ENST00000675259.1	1
ENSG00000222009.9	ENST00000409335.6	1
ENSG00000117425.14	ENST00000438067.5	1
ENSG00000117425.14	ENST00000447098.6	1
ENSG00000117425.14	ENST00000372192.4	1
ENSG00000070785.17	ENST00000360403.7	0.526189
ENSG00000070785.17	ENST00000372183.7	0.869548
ENSG00000126107.15	ENST00000372172.5	0.909679
ENSG00000126088.14	ENST00000651476.1	1
ENSG00000126088.14	ENST00000652287.1	0.436208
ENSG00000126088.14	ENST00000246337.9	0.561273
ENSG00000162415.7	ENST00000359600.6	0.861543
ENSG00000132781.20	ENST00000372104.5	1
ENSG00000132781.20	ENST00000448481.5	1
ENSG00000132781.20	ENST00000456914.7	0.798396
ENSG00000132781.20	ENST00000354383.10	0.876886
ENSG00000132781.20	ENST00000372110.7	0.861463
ENSG00000132781.20	ENST00000372115.7	1
ENSG00000132773.12	ENST00000372090.6	0.540409
ENSG00000070759.17	ENST00000372084.5	0.36057
ENSG00000132763.15	ENST00000401061.9	0.261775
ENSG00000132763.15	ENST00000616135.1	0.688959
ENSG00000117450.15	ENST00000447184.6	1
ENSG00000117450.15	ENST00000424390.2	1
ENSG00000117450.15	ENST00000676549.1	1
ENSG00000117450.15	ENST00000262746.5	0.704461
ENSG00000117450.15	ENST00000372079.1	0.75495
ENSG00000117450.15	ENST00000319248.13	0.482922
ENSG00000117448.14	ENST00000372070.7	0.565589
ENSG00000117448.14	ENST00000621846.4	0.600609
ENSG00000117448.14	ENST00000351829.9	0.581333
ENSG00000132780.17	ENST00000537798.5	0.963236
ENSG00000132780.17	ENST00000350030.8	0.950347
ENSG00000132780.17	ENST00000372052.8	0.524367
ENSG00000132780.17	ENST00000351223.7	1
ENSG00000159592.11	ENST00000290795.7	0.511771
ENSG00000159596.7	ENST00000372025.5	0.639554
ENSG00000197429.11	ENST00000359942.8	0.492848
ENSG00000086015.23	ENST00000361297.7	1
ENSG00000086015.23	ENST00000674079.1	0.689194
ENSG00000117461.15	ENST00000372006.5	0.832658
ENSG00000117472.10	ENST00000372003.6	0.871207
ENSG00000085998.15	ENST00000371984.8	0.893805
ENSG00000085998.15	ENST00000396420.8	1
ENSG00000085998.15	ENST00000686737.1	0.627587
ENSG00000085998.15	ENST00000685444.1	0.603869
ENSG00000085998.15	ENST00000688608.1	1
ENSG00000085998.15	ENST00000687683.1	0.886115
ENSG00000085999.13	ENST00000442598.5	0.94203
ENSG00000085999.13	ENST00000488942.5	1
ENSG00000132128.18	ENST00000617190.5	1
ENSG00000132128.18	ENST00000343304.10	1
ENSG00000132128.18	ENST00000615587.4	0.753329
ENSG00000173660.12	ENST00000311672.10	0.469287
ENSG00000117481.11	ENST00000474844.6	0.770651
ENSG00000117481.11	ENST00000537428.2	0.584414
ENSG00000117480.16	ENST00000243167.9	0.665632
ENSG00000079277.22	ENST00000371945.10	1
ENSG00000079277.22	ENST00000649800.1	1
ENSG00000079277.22	ENST00000650026.1	1
ENSG00000079277.22	ENST00000650508.1	0.865522
ENSG00000079277.22	ENST00000465783.6	0.700591
ENSG00000142961.16	ENST00000319928.9	0.520124
ENSG00000123472.13	ENST00000574428.6	0.593834
ENSG00000123472.13	ENST00000526821.5	0.643907
ENSG00000159658.15	ENST00000371933.8	0.757286
ENSG00000159658.15	ENST00000672422.2	0.702284
ENSG00000159658.15	ENST00000674435.1	0.655082
ENSG00000187048.14	ENST00000310638.9	1
ENSG00000187048.14	ENST00000371905.1	1
ENSG00000186377.8	ENST00000371901.4	1
ENSG00000162365.13	ENST00000371891.8	1
ENSG00000162365.13	ENST00000619754.4	1
ENSG00000162366.8	ENST00000294338.7	0.523482
ENSG00000162367.12	ENST00000691006.1	1
ENSG00000123473.17	ENST00000683977.1	1
ENSG00000123473.17	ENST00000682977.1	1
ENSG00000162368.14	ENST00000371873.10	0.457501
ENSG00000186790.6	ENST00000335071.4	1
ENSG00000186564.6	ENST00000334793.6	0.950172
ENSG00000269113.4	ENST00000606738.3	0.887562
ENSG00000117834.13	ENST00000438567.7	0.960577
ENSG00000132122.12	ENST00000396199.7	1
ENSG00000132122.12	ENST00000371843.7	1
ENSG00000186094.18	ENST00000371839.6	1
ENSG00000185104.21	ENST00000396153.7	0.79369
ENSG00000123080.12	ENST00000262662.5	1
ENSG00000123080.12	ENST00000396148.2	0.585504
ENSG00000123080.12	ENST00000371761.4	0.596912
ENSG00000123091.5	ENST00000242719.4	0.391103
ENSG00000085831.16	ENST00000680483.1	1
ENSG00000085831.16	ENST00000422925.6	1
ENSG00000085831.16	ENST00000439482.6	1
ENSG00000085831.16	ENST00000262675.11	0.863511
ENSG00000085831.16	ENST00000371747.7	1
ENSG00000085831.16	ENST00000262676.9	1
ENSG00000085832.17	ENST00000371730.6	0.254371
ENSG00000085832.17	ENST00000371733.8	0.734718
ENSG00000117859.19	ENST00000371714.5	0.523726
ENSG00000117859.19	ENST00000447887.5	1
ENSG00000117859.19	ENST00000428468.6	0.585703
ENSG00000117859.19	ENST00000453295.5	0.752953
ENSG00000117859.19	ENST00000361556.9	0.867098
ENSG00000117859.19	ENST00000462759.5	0.124505
ENSG00000078618.23	ENST00000440943.5	0.671387
ENSG00000078618.23	ENST00000539524.5	1
ENSG00000078618.23	ENST00000352171.12	0.78514
ENSG00000169213.7	ENST00000371655.4	0.891529
ENSG00000117862.13	ENST00000371626.9	0.692677
ENSG00000198841.4	ENST00000371614.2	0.559982
ENSG00000134717.18	ENST00000489308.6	0.403052
ENSG00000134717.18	ENST00000313334.13	0.36406
ENSG00000134717.18	ENST00000472944.6	0.67609
ENSG00000157077.16	ENST00000287727.8	0.838345
ENSG00000157077.16	ENST00000371591.2	1
ENSG00000157077.16	ENST00000357206.6	0.681825
ENSG00000154222.15	ENST00000371586.6	1
ENSG00000154222.15	ENST00000284376.8	0.90572
ENSG00000154222.15	ENST00000438021.5	0.671169
ENSG00000085840.13	ENST00000371566.1	0.776098
ENSG00000134748.13	ENST00000257181.10	0.581475
ENSG00000134744.14	ENST00000257177.9	0.823957
ENSG00000134744.14	ENST00000355809.4	1
ENSG00000116157.6	ENST00000361314.5	0.763976
ENSG00000182183.15	ENST00000517870.2	1
ENSG00000162377.6	ENST00000371538.5	0.53297
ENSG00000162378.13	ENST00000294353.7	0.404842
ENSG00000203995.10	ENST00000612017.4	1
ENSG00000121310.17	ENST00000371522.9	0.875378
ENSG00000121310.17	ENST00000536120.5	1
ENSG00000121310.17	ENST00000358358.9	0.897334
ENSG00000116171.19	ENST00000371514.8	0.705265
ENSG00000116171.19	ENST00000408941.7	0.709402
ENSG00000116171.19	ENST00000488965.1	1
ENSG00000174348.14	ENST00000312553.10	0.735088
ENSG00000157184.7	ENST00000637252.1	0.64438
ENSG00000157184.7	ENST00000371486.4	0.660973
ENSG00000162384.14	ENST00000294360.5	0.325961
ENSG00000162385.11	ENST00000371470.8	0.511062
ENSG00000157193.18	ENST00000306052.12	0.768546
ENSG00000157193.18	ENST00000668448.1	1
ENSG00000157193.18	ENST00000657895.1	1
ENSG00000157193.18	ENST00000662198.1	1
ENSG00000157193.18	ENST00000668071.1	0.863911
ENSG00000157193.18	ENST00000653217.1	1
ENSG00000058804.12	ENST00000371429.4	0.696734
ENSG00000058799.15	ENST00000371399.5	0.417853
ENSG00000211452.12	ENST00000361921.8	0.935289
ENSG00000211452.12	ENST00000322679.10	0.91993
ENSG00000081870.12	ENST00000371378.6	0.411965
ENSG00000081870.12	ENST00000194214.10	0.499833
ENSG00000116212.15	ENST00000371368.5	1
ENSG00000116212.15	ENST00000319223.8	0.440295
ENSG00000203985.11	ENST00000545928.5	1
ENSG00000203985.11	ENST00000420619.5	1
ENSG00000116209.12	ENST00000234831.10	0.308253
ENSG00000116209.12	ENST00000371348.5	0.185908
ENSG00000116209.12	ENST00000371341.5	1
ENSG00000116209.12	ENST00000452421.5	0.859246
ENSG00000116205.14	ENST00000234827.6	0.768915
ENSG00000215883.11	ENST00000287899.13	1
ENSG00000215883.11	ENST00000497820.1	1
ENSG00000116221.15	ENST00000360840.9	0.353967
ENSG00000116221.15	ENST00000605337.5	0.847516
ENSG00000116221.15	ENST00000398219.2	0.696424
ENSG00000157216.16	ENST00000417664.7	1
ENSG00000157216.16	ENST00000371319.8	0.543432
ENSG00000157216.16	ENST00000357475.9	0.563658
ENSG00000157216.16	ENST00000610401.5	1
ENSG00000162390.18	ENST00000343744.7	0.762692
ENSG00000162391.12	ENST00000302250.7	0.847852
ENSG00000162391.12	ENST00000371304.2	1
ENSG00000243725.7	ENST00000371281.4	0.799776
ENSG00000162396.6	ENST00000371279.4	0.606985
ENSG00000006555.11	ENST00000371276.9	0.911387
ENSG00000116133.13	ENST00000371269.9	0.668983
ENSG00000116133.13	ENST00000535035.6	0.697994
ENSG00000169174.11	ENST00000302118.5	1
ENSG00000169174.11	ENST00000673903.1	0.589473
ENSG00000162402.14	ENST00000294383.7	0.333827
ENSG00000162402.14	ENST00000484447.5	1
ENSG00000162407.9	ENST00000371250.4	0.466451
ENSG00000162409.12	ENST00000371244.9	0.68753
ENSG00000187889.13	ENST00000343433.7	1
ENSG00000157131.12	ENST00000695677.1	1
ENSG00000157131.12	ENST00000695681.1	1
ENSG00000157131.12	ENST00000361249.4	0.915435
ENSG00000021852.14	ENST00000371237.9	0.987415
ENSG00000021852.14	ENST00000695842.1	0.993282
ENSG00000021852.14	ENST00000696164.1	1
ENSG00000173406.16	ENST00000371236.7	0.746188
ENSG00000173406.16	ENST00000414851.6	0.936075
ENSG00000173406.16	ENST00000332102.10	0.677358
ENSG00000162600.12	ENST00000371226.8	0.399163
ENSG00000162601.11	ENST00000655340.1	1
ENSG00000162601.11	ENST00000472487.6	1
ENSG00000162601.11	ENST00000622766.1	0.568339
ENSG00000177606.8	ENST00000371222.4	0.273476
ENSG00000172456.18	ENST00000303721.12	0.659288
ENSG00000172456.18	ENST00000371212.5	0.723325
ENSG00000172456.18	ENST00000371210.1	0.953028
ENSG00000134709.13	ENST00000371208.5	0.0912739
ENSG00000134716.11	ENST00000371204.4	0.917051
ENSG00000162599.17	ENST00000403491.8	0.923813
ENSG00000162599.17	ENST00000663597.1	1
ENSG00000162599.17	ENST00000357977.5	0.874162
ENSG00000162599.17	ENST00000493627.1	1
ENSG00000162604.12	ENST00000606498.5	0.463375
ENSG00000162604.12	ENST00000371177.2	1
ENSG00000132849.22	ENST00000371158.6	1
ENSG00000132849.22	ENST00000642238.2	0.583333
ENSG00000132849.22	ENST00000494842.2	1
ENSG00000132849.22	ENST00000646453.1	0.871272
ENSG00000132849.22	ENST00000307297.8	1
ENSG00000132854.19	ENST00000371153.9	0.850065
ENSG00000162607.13	ENST00000371146.5	0.680494
ENSG00000116641.18	ENST00000251157.10	1
ENSG00000116641.18	ENST00000635253.2	0.842605
ENSG00000116641.18	ENST00000454575.6	1
ENSG00000116641.18	ENST00000340370.10	0.841879
ENSG00000116641.18	ENST00000404627.3	0.767495
ENSG00000132855.5	ENST00000371129.4	0.665893
ENSG00000125703.15	ENST00000371120.7	0.616332
ENSG00000088035.18	ENST00000263440.6	0.729277
ENSG00000142856.17	ENST00000271002.15	0.613874
ENSG00000203965.13	ENST00000371088.5	0.871786
ENSG00000079739.17	ENST00000371084.8	0.318844
ENSG00000079739.17	ENST00000540265.5	1
ENSG00000185483.13	ENST00000371079.6	0.842304
ENSG00000162437.15	ENST00000371072.8	0.859706
ENSG00000162434.13	ENST00000342505.5	0.614873
ENSG00000162434.13	ENST00000673046.1	0.67161
ENSG00000162434.13	ENST00000672247.1	0.824257
ENSG00000162434.13	ENST00000672434.1	1
ENSG00000162434.13	ENST00000672574.1	0.655267
ENSG00000162434.13	ENST00000673246.1	0.816813
ENSG00000162433.15	ENST00000545314.5	1
ENSG00000162433.15	ENST00000395334.6	1
ENSG00000162433.15	ENST00000327299.8	0.231935
ENSG00000116675.16	ENST00000494710.6	1
ENSG00000116675.16	ENST00000395325.7	0.59799
ENSG00000213625.9	ENST00000371065.9	0.193274
ENSG00000116678.20	ENST00000371059.7	0.867917
ENSG00000116678.20	ENST00000349533.11	0.849403
ENSG00000116678.20	ENST00000616738.4	0.94509
ENSG00000116678.20	ENST00000371058.1	1
ENSG00000184588.18	ENST00000371045.9	0.545558
ENSG00000152760.10	ENST00000282670.7	1
ENSG00000152763.17	ENST00000371026.8	1
ENSG00000198160.15	ENST00000355977.10	0.749379
ENSG00000198160.15	ENST00000371012.6	0.362226
ENSG00000198160.15	ENST00000401041.6	1
ENSG00000198160.15	ENST00000355356.3	0.497295
ENSG00000116704.8	ENST00000235345.6	0.465767
ENSG00000081985.14	ENST00000674203.2	1
ENSG00000142864.15	ENST00000361219.11	1
ENSG00000142864.15	ENST00000370994.8	0.249706
ENSG00000142864.15	ENST00000370995.6	0.503919
ENSG00000142864.15	ENST00000370990.5	0.873907
ENSG00000116717.13	ENST00000370986.9	0.382896
ENSG00000116717.13	ENST00000617962.2	0.634402
ENSG00000172380.6	ENST00000370982.4	0.665814
ENSG00000162595.8	ENST00000646789.1	1
ENSG00000116729.14	ENST00000354777.6	0.778346
ENSG00000116729.14	ENST00000262348.9	1
ENSG00000116729.14	ENST00000370976.7	0.555747
ENSG00000116729.14	ENST00000370971.1	1
ENSG00000024526.17	ENST00000456315.7	0.872078
ENSG00000024526.17	ENST00000370966.9	0.880829
ENSG00000033122.21	ENST00000651989.2	1
ENSG00000066557.6	ENST00000370952.4	0.630034
ENSG00000116754.14	ENST00000370950.7	0.560772
ENSG00000116754.14	ENST00000370949.2	0.891198
ENSG00000118454.13	ENST00000370944.9	0.756729
ENSG00000118454.13	ENST00000262346.6	0.955026
ENSG00000116761.12	ENST00000411986.6	0.561066
ENSG00000116761.12	ENST00000370938.8	1
ENSG00000132485.14	ENST00000370920.8	0.495622
ENSG00000132485.14	ENST00000254821.10	0.808974
ENSG00000172260.15	ENST00000357731.10	0.999866
ENSG00000172260.15	ENST00000306821.3	1
ENSG00000162620.16	ENST00000370911.7	1
ENSG00000259030.8	ENST00000534632.5	1
ENSG00000254685.8	ENST00000370898.9	0.489375
ENSG00000116791.14	ENST00000370872.7	0.807735
ENSG00000116791.14	ENST00000340866.10	0.469144
ENSG00000162623.16	ENST00000457880.6	0.629076
ENSG00000162623.16	ENST00000370867.8	0.9152
ENSG00000162623.16	ENST00000479111.5	0.945317
ENSG00000137968.17	ENST00000370859.8	0.607375
ENSG00000117054.15	ENST00000680805.1	1
ENSG00000117054.15	ENST00000681790.1	0.712104
ENSG00000117054.15	ENST00000370841.9	0.782472
ENSG00000117054.15	ENST00000679687.1	0.548156
ENSG00000137955.16	ENST00000319942.8	0.69331
ENSG00000184005.11	ENST00000328299.4	1
ENSG00000142892.15	ENST00000370812.8	0.36462
ENSG00000142892.15	ENST00000445065.5	1
ENSG00000154027.19	ENST00000354567.7	1
ENSG00000154027.19	ENST00000478255.1	1
ENSG00000036549.13	ENST00000370801.8	1
ENSG00000077254.14	ENST00000481579.5	0.738091
ENSG00000077254.14	ENST00000357428.5	1
ENSG00000077254.14	ENST00000370792.7	0.594518
ENSG00000180488.16	ENST00000370791.8	0.556116
ENSG00000162614.19	ENST00000342754.5	0.919718
ENSG00000162613.17	ENST00000370768.7	0.311703
ENSG00000162613.17	ENST00000370767.5	0.660979
ENSG00000162616.9	ENST00000370763.6	0.453327
ENSG00000137960.6	ENST00000370759.4	0.552665
ENSG00000122420.10	ENST00000370758.5	1
ENSG00000137959.17	ENST00000679848.1	1
ENSG00000137965.11	ENST00000370747.9	1
ENSG00000137965.11	ENST00000446486.1	1
ENSG00000162618.15	ENST00000656841.1	1
ENSG00000117114.21	ENST00000370728.5	0.772584
ENSG00000117114.21	ENST00000370730.5	0.535673
ENSG00000117114.21	ENST00000674442.1	1
ENSG00000117114.21	ENST00000674419.1	1
ENSG00000117114.21	ENST00000674307.1	0.638911
ENSG00000117114.21	ENST00000319517.10	1
ENSG00000117114.21	ENST00000370717.6	1
ENSG00000117114.21	ENST00000627151.2	0.553384
ENSG00000117114.21	ENST00000686636.1	1
ENSG00000117114.21	ENST00000674393.1	0.659399
ENSG00000117114.21	ENST00000402328.2	0.884398
ENSG00000142875.20	ENST00000370689.6	0.571667
ENSG00000142875.20	ENST00000370688.7	0.681898
ENSG00000142875.20	ENST00000610703.4	0.543334
ENSG00000142875.20	ENST00000614872.4	0.82347
ENSG00000142875.20	ENST00000394839.6	0.823001
ENSG00000142875.20	ENST00000610457.1	1
ENSG00000203943.9	ENST00000370668.7	0.665571
ENSG00000137976.8	ENST00000370662.3	1
ENSG00000117133.11	ENST00000370654.6	0.584893
ENSG00000174021.12	ENST00000370645.9	0.48768
ENSG00000174021.12	ENST00000370641.3	1
ENSG00000174021.12	ENST00000686161.1	1
ENSG00000117151.13	ENST00000370630.6	0.787127
ENSG00000117155.17	ENST00000342203.8	0.309917
ENSG00000171517.6	ENST00000440886.1	1
ENSG00000153898.13	ENST00000370608.8	1
ENSG00000055732.13	ENST00000370589.7	1
ENSG00000097096.10	ENST00000341460.6	0.611296
ENSG00000162642.14	ENST00000471115.6	0.843061
ENSG00000142867.14	ENST00000648566.1	0.523674
ENSG00000153904.21	ENST00000284031.13	0.427896
ENSG00000142871.18	ENST00000451137.7	0.724288
ENSG00000117174.11	ENST00000431532.6	0.5478
ENSG00000171502.15	ENST00000370571.7	0.550014
ENSG00000122417.16	ENST00000359242.7	1
ENSG00000122417.16	ENST00000370566.7	1
ENSG00000122417.16	ENST00000696304.1	1
ENSG00000122417.16	ENST00000294678.6	0.937505
ENSG00000122417.16	ENST00000317336.11	0.82807
ENSG00000097033.14	ENST00000535010.5	0.550807
ENSG00000097033.14	ENST00000370558.8	0.479118
ENSG00000097033.14	ENST00000482504.1	0.651005
ENSG00000183291.18	ENST00000331835.10	0.632534
ENSG00000183291.18	ENST00000370554.5	0.323287
ENSG00000153936.18	ENST00000370550.10	0.888235
ENSG00000153936.18	ENST00000370551.8	0.470993
ENSG00000153936.18	ENST00000690674.1	1
ENSG00000267561.2	ENST00000370548.3	1
ENSG00000143013.13	ENST00000370544.10	0.558128
ENSG00000143013.13	ENST00000370542.1	0.729137
ENSG00000065243.20	ENST00000370521.8	0.408574
ENSG00000137947.12	ENST00000370500.10	0.437352
ENSG00000137944.18	ENST00000260508.9	0.439591
ENSG00000213516.10	ENST00000652648.1	0.278572
ENSG00000213516.10	ENST00000321792.5	0.304356
ENSG00000117226.12	ENST00000370481.9	0.927241
ENSG00000117228.11	ENST00000370473.5	0.756174
ENSG00000162645.13	ENST00000370466.4	1
ENSG00000213512.3	ENST00000294671.3	1
ENSG00000162654.9	ENST00000355754.7	1
ENSG00000154451.15	ENST00000370459.8	0.760017
ENSG00000154451.15	ENST00000443807.1	1
ENSG00000197147.15	ENST00000330947.7	0.791845
ENSG00000171488.15	ENST00000370454.9	0.966878
ENSG00000171492.14	ENST00000525774.5	1
ENSG00000171492.14	ENST00000337338.9	0.526696
ENSG00000171492.14	ENST00000394593.7	0.453974
ENSG00000162664.17	ENST00000340281.9	0.610712
ENSG00000162664.17	ENST00000370447.3	0.777473
ENSG00000122482.22	ENST00000347275.9	0.604261
ENSG00000122482.22	ENST00000337393.10	0.862469
ENSG00000162669.16	ENST00000370425.8	1
ENSG00000097046.13	ENST00000234626.11	0.908004
ENSG00000069702.11	ENST00000212355.9	0.887532
ENSG00000137948.19	ENST00000402388.1	1
ENSG00000137948.19	ENST00000680194.1	1
ENSG00000172031.7	ENST00000370383.5	1
ENSG00000189195.15	ENST00000370378.5	1
ENSG00000189195.15	ENST00000637221.2	0.346409
ENSG00000174842.17	ENST00000370360.8	1
ENSG00000122484.9	ENST00000610020.2	0.523657
ENSG00000162676.13	ENST00000294702.6	0.815335
ENSG00000162676.13	ENST00000696667.1	1
ENSG00000162676.13	ENST00000427103.6	1
ENSG00000067208.16	ENST00000370331.5	0.344687
ENSG00000122406.14	ENST00000370321.8	0.723499
ENSG00000122406.14	ENST00000315741.5	1
ENSG00000154511.12	ENST00000613902.4	1
ENSG00000154511.12	ENST00000616709.4	0.329864
ENSG00000154511.12	ENST00000370310.5	1
ENSG00000143033.18	ENST00000540243.5	0.632228
ENSG00000143033.18	ENST00000545708.5	1
ENSG00000117500.13	ENST00000370282.8	0.338037
ENSG00000117500.13	ENST00000479918.5	1
ENSG00000122483.18	ENST00000343253.11	1
ENSG00000122483.18	ENST00000448243.6	1
ENSG00000122483.18	ENST00000690025.1	1
ENSG00000117505.13	ENST00000370272.9	0.400379
ENSG00000117505.13	ENST00000370267.1	0.726181
ENSG00000137942.18	ENST00000260506.12	0.71102
ENSG00000137942.18	ENST00000370253.6	0.937343
ENSG00000137936.18	ENST00000260502.11	1
ENSG00000137936.18	ENST00000370247.7	0.679431
ENSG00000137936.18	ENST00000539242.5	1
ENSG00000137936.18	ENST00000370243.1	0.86682
ENSG00000067334.14	ENST00000436063.7	0.902373
ENSG00000023909.10	ENST00000370238.8	0.701148
ENSG00000023909.10	ENST00000615724.1	1
ENSG00000198691.14	ENST00000370225.4	1
ENSG00000198691.14	ENST00000649773.1	1
ENSG00000137962.13	ENST00000260526.11	0.365005
ENSG00000137962.13	ENST00000370217.3	1
ENSG00000117528.14	ENST00000370214.9	0.606037
ENSG00000117528.14	ENST00000647998.2	0.454775
ENSG00000117528.14	ENST00000315713.5	0.868425
ENSG00000117525.14	ENST00000334047.12	0.973716
ENSG00000117525.14	ENST00000370207.4	0.636634
ENSG00000143036.17	ENST00000446120.6	0.961992
ENSG00000143036.17	ENST00000527077.5	0.795894
ENSG00000143036.17	ENST00000529450.5	1
ENSG00000143036.17	ENST00000467909.5	1
ENSG00000117519.16	ENST00000545882.5	0.634433
ENSG00000117519.16	ENST00000394202.8	1
ENSG00000117519.16	ENST00000370206.9	0.387231
ENSG00000172339.10	ENST00000370205.6	0.313725
ENSG00000152078.10	ENST00000370203.9	0.760506
ENSG00000271092.5	ENST00000604534.5	1
ENSG00000122481.17	ENST00000370202.5	0.707548
ENSG00000117569.19	ENST00000609116.5	0.393939
ENSG00000117569.19	ENST00000370197.5	1
ENSG00000117569.19	ENST00000370198.5	0.72268
ENSG00000117569.19	ENST00000675401.1	0.68745
ENSG00000188641.14	ENST00000370192.8	0.906521
ENSG00000188641.14	ENST00000306031.5	0.498086
ENSG00000162627.17	ENST00000529992.5	0.793768
ENSG00000162627.17	ENST00000306121.8	0.545076
ENSG00000099260.12	ENST00000263174.9	0.474093
ENSG00000099260.12	ENST00000605497.5	1
ENSG00000156869.14	ENST00000646001.2	0.322953
ENSG00000162688.17	ENST00000361915.8	0.840522
ENSG00000162688.17	ENST00000370165.7	1
ENSG00000162688.17	ENST00000370163.7	1
ENSG00000162688.17	ENST00000294724.8	1
ENSG00000162688.17	ENST00000370161.6	0.622587
ENSG00000117620.15	ENST00000533028.8	0.999268
ENSG00000117620.15	ENST00000640715.1	0.508985
ENSG00000117620.15	ENST00000465289.6	0.873047
ENSG00000117620.15	ENST00000638988.1	1
ENSG00000117620.15	ENST00000640600.1	0.532729
ENSG00000117620.15	ENST00000370153.6	0.642094
ENSG00000156875.14	ENST00000370152.8	0.516972
ENSG00000156876.10	ENST00000287482.6	0.556845
ENSG00000122435.11	ENST00000370141.8	0.360177
ENSG00000137992.15	ENST00000370132.8	0.611244
ENSG00000137996.13	ENST00000370128.9	0.752946
ENSG00000137996.13	ENST00000260563.4	0.725766
ENSG00000079335.20	ENST00000336454.5	0.90999
ENSG00000181656.7	ENST00000315033.5	1
ENSG00000162692.12	ENST00000370115.1	1
ENSG00000162694.14	ENST00000370114.8	0.52864
ENSG00000162695.12	ENST00000370112.8	0.315488
ENSG00000162695.12	ENST00000357650.9	1
ENSG00000117543.22	ENST00000370109.8	0.499709
ENSG00000117543.22	ENST00000427040.3	1
ENSG00000117543.22	ENST00000342173.11	1
ENSG00000170989.10	ENST00000305352.7	1
ENSG00000118733.17	ENST00000370103.9	1
ENSG00000118733.17	ENST00000338858.9	1
ENSG00000185946.16	ENST00000524631.5	0.908127
ENSG00000185946.16	ENST00000423855.7	0.631255
ENSG00000240038.7	ENST00000684275.1	1
ENSG00000243480.8	ENST00000414303.7	1
ENSG00000187733.7	ENST00000370079.3	1
ENSG00000198890.9	ENST00000370078.2	0.856676
ENSG00000134215.16	ENST00000370056.9	0.623847
ENSG00000134215.16	ENST00000527011.5	0.725783
ENSG00000085491.17	ENST00000569674.1	1
ENSG00000196427.14	ENST00000415641.8	1
ENSG00000186086.19	ENST00000495380.7	1
ENSG00000162636.16	ENST00000405454.1	1
ENSG00000162636.16	ENST00000370035.8	0.414907
ENSG00000134186.12	ENST00000370025.9	0.678564
ENSG00000134186.12	ENST00000370022.9	1
ENSG00000134186.12	ENST00000370021.1	0.384233
ENSG00000116266.11	ENST00000370008.4	0.199481
ENSG00000121957.15	ENST00000406462.6	0.933478
ENSG00000121957.15	ENST00000441735.2	0.530742
ENSG00000121957.15	ENST00000642355.1	1
ENSG00000121957.15	ENST00000645164.2	0.561
ENSG00000121957.15	ENST00000264126.9	0.664099
ENSG00000121957.15	ENST00000675086.1	1
ENSG00000121957.15	ENST00000676184.1	0.723142
ENSG00000121957.15	ENST00000446797.2	1
ENSG00000121940.17	ENST00000685497.1	0.7
ENSG00000121940.17	ENST00000686776.1	0.932122
ENSG00000121940.17	ENST00000692342.1	1
ENSG00000121940.17	ENST00000687734.1	1
ENSG00000121940.17	ENST00000688778.1	1
ENSG00000121940.17	ENST00000685104.1	1
ENSG00000121940.17	ENST00000689103.1	0.6
ENSG00000121940.17	ENST00000687591.1	0.579938
ENSG00000121940.17	ENST00000691777.1	0.625029
ENSG00000121940.17	ENST00000690756.1	1
ENSG00000121940.17	ENST00000689991.1	1
ENSG00000121940.17	ENST00000691513.1	1
ENSG00000121940.17	ENST00000686821.1	1
ENSG00000121940.17	ENST00000692511.1	1
ENSG00000121940.17	ENST00000689479.1	1
ENSG00000121940.17	ENST00000687646.1	0.85
ENSG00000121940.17	ENST00000687226.1	1
ENSG00000121940.17	ENST00000693336.1	0.714033
ENSG00000121940.17	ENST00000685540.1	0.999996
ENSG00000121940.17	ENST00000685014.1	0.698205
ENSG00000121940.17	ENST00000687328.1	0.519229
ENSG00000121940.17	ENST00000690781.1	1
ENSG00000121940.17	ENST00000688285.1	1
ENSG00000121940.17	ENST00000687449.1	1
ENSG00000121940.17	ENST00000687099.1	0.736789
ENSG00000121940.17	ENST00000685791.1	1
ENSG00000121940.17	ENST00000691556.1	1
ENSG00000121940.17	ENST00000369969.7	0.566808
ENSG00000121940.17	ENST00000356970.6	0.526061
ENSG00000121940.17	ENST00000675571.1	1
ENSG00000121940.17	ENST00000675650.1	0.846366
ENSG00000121940.17	ENST00000675654.1	1
ENSG00000121940.17	ENST00000675790.1	1
ENSG00000121940.17	ENST00000675584.1	1
ENSG00000121940.17	ENST00000676392.2	1
ENSG00000121940.17	ENST00000675956.1	1
ENSG00000121940.17	ENST00000686078.1	1
ENSG00000085433.17	ENST00000361054.7	0.885732
ENSG00000197780.11	ENST00000461096.7	0.710087
ENSG00000215717.7	ENST00000338272.9	0.182319
ENSG00000116299.17	ENST00000529753.5	1
ENSG00000031698.13	ENST00000234677.7	1
ENSG00000031698.13	ENST00000369923.4	0.444921
ENSG00000143126.8	ENST00000271332.4	0.520474
ENSG00000134222.16	ENST00000369904.7	1
ENSG00000134222.16	ENST00000369909.7	1
ENSG00000134222.16	ENST00000369907.7	0.843059
ENSG00000134222.16	ENST00000369903.6	1
ENSG00000221986.7	ENST00000357155.2	1
ENSG00000134243.12	ENST00000256637.8	0.759068
ENSG00000143106.13	ENST00000271308.9	0.409112
ENSG00000143028.9	ENST00000369872.4	0.836991
ENSG00000162650.17	ENST00000683729.1	1
ENSG00000162650.17	ENST00000369870.7	1
ENSG00000174151.15	ENST00000420578.7	0.510594
ENSG00000181754.7	ENST00000369864.5	0.817505
ENSG00000065135.12	ENST00000369851.7	0.603733
ENSG00000134183.13	ENST00000351050.8	1
ENSG00000116337.20	ENST00000667949.2	1
ENSG00000116337.20	ENST00000342115.8	0.587732
ENSG00000116337.20	ENST00000528667.7	0.560897
ENSG00000116337.20	ENST00000256578.8	0.408707
ENSG00000116337.20	ENST00000476688.3	1
ENSG00000168765.18	ENST00000369836.9	0.779902
ENSG00000168765.18	ENST00000326729.9	0.720835
ENSG00000168765.18	ENST00000369833.5	1
ENSG00000213366.13	ENST00000369827.7	0.794317
ENSG00000213366.13	ENST00000241337.9	0.909051
ENSG00000134184.13	ENST00000309851.10	1
ENSG00000134184.13	ENST00000349334.7	1
ENSG00000134201.12	ENST00000256593.8	1
ENSG00000134202.12	ENST00000256594.7	0.823621
ENSG00000198758.11	ENST00000361852.8	0.599986
ENSG00000184371.14	ENST00000329608.11	0.625315
ENSG00000184371.14	ENST00000369802.7	1
ENSG00000168710.18	ENST00000369799.10	0.327502
ENSG00000143093.15	ENST00000369796.5	0.531481
ENSG00000116396.15	ENST00000438661.3	1
ENSG00000116396.15	ENST00000369787.7	0.898561
ENSG00000116396.15	ENST00000413138.7	1
ENSG00000162775.17	ENST00000652747.1	1
ENSG00000162775.17	ENST00000654015.1	0.428526
ENSG00000162775.17	ENST00000617047.1	1
ENSG00000168679.18	ENST00000437429.6	1
ENSG00000168679.18	ENST00000369781.8	1
ENSG00000168679.18	ENST00000467986.2	1
ENSG00000134248.14	ENST00000483260.5	1
ENSG00000134248.14	ENST00000474861.6	0.694434
ENSG00000134248.14	ENST00000602318.6	0.457864
ENSG00000134248.14	ENST00000256644.8	0.769139
ENSG00000134248.14	ENST00000602858.5	1
ENSG00000143119.14	ENST00000271324.6	1
ENSG00000121931.16	ENST00000369763.5	0.980954
ENSG00000121931.16	ENST00000494675.5	0.865673
ENSG00000121931.16	ENST00000485275.2	0.874954
ENSG00000156171.15	ENST00000484310.6	0.53171
ENSG00000156171.15	ENST00000539140.6	0.652184
ENSG00000162777.17	ENST00000369752.5	1
ENSG00000085465.13	ENST00000369732.4	0.409301
ENSG00000116455.14	ENST00000235090.10	0.509156
ENSG00000116459.11	ENST00000369722.8	0.509192
ENSG00000143110.12	ENST00000369718.4	1
ENSG00000116473.15	ENST00000356415.5	0.343537
ENSG00000116473.15	ENST00000369709.4	0.589453
ENSG00000197852.12	ENST00000357260.6	0.589557
ENSG00000197852.12	ENST00000534365.1	1
ENSG00000064703.13	ENST00000679724.1	1
ENSG00000064703.13	ENST00000369702.5	0.636675
ENSG00000171385.10	ENST00000369697.5	1
ENSG00000143079.15	ENST00000271277.11	0.596981
ENSG00000134245.18	ENST00000369686.9	0.99998
ENSG00000134245.18	ENST00000369684.5	0.772727
ENSG00000007341.19	ENST00000358039.9	1
ENSG00000007341.19	ENST00000360743.8	0.549918
ENSG00000007341.19	ENST00000369666.5	1
ENSG00000116489.13	ENST00000263168.4	0.509466
ENSG00000155363.19	ENST00000413052.6	1
ENSG00000155363.19	ENST00000369645.6	0.602883
ENSG00000155363.19	ENST00000369644.5	0.728362
ENSG00000155363.19	ENST00000357443.2	1
ENSG00000155366.17	ENST00000369633.6	0.638612
ENSG00000155366.17	ENST00000339083.12	0.754066
ENSG00000155366.17	ENST00000369642.7	1
ENSG00000155367.16	ENST00000309276.11	1
ENSG00000155380.13	ENST00000369626.8	1
ENSG00000155380.13	ENST00000679803.1	0.42324
ENSG00000198799.12	ENST00000361127.6	0.274848
ENSG00000081026.19	ENST00000307546.14	1
ENSG00000081026.19	ENST00000369615.5	0.722725
ENSG00000116793.16	ENST00000393357.6	1
ENSG00000116793.16	ENST00000369598.5	0.566212
ENSG00000116793.16	ENST00000357783.6	0.495951
ENSG00000081019.14	ENST00000612242.4	0.859306
ENSG00000081019.14	ENST00000615321.1	1
ENSG00000134262.13	ENST00000256658.8	0.808714
ENSG00000118655.7	ENST00000650450.2	0.68666
ENSG00000163349.22	ENST00000626993.2	1
ENSG00000163349.22	ENST00000340480.8	1
ENSG00000163349.22	ENST00000361587.3	0.745078
ENSG00000116774.12	ENST00000320334.5	0.792876
ENSG00000197323.12	ENST00000358465.7	0.340631
ENSG00000116752.6	ENST00000369541.4	0.545044
ENSG00000213281.5	ENST00000369535.5	0.761865
ENSG00000009307.17	ENST00000339438.10	0.728589
ENSG00000009307.17	ENST00000689989.1	0.892647
ENSG00000009307.17	ENST00000689217.1	0.409149
ENSG00000009307.17	ENST00000688211.1	1
ENSG00000009307.17	ENST00000438362.7	0.91635
ENSG00000009307.17	ENST00000358528.9	0.6084
ENSG00000009307.17	ENST00000692719.1	0.562838
ENSG00000009307.17	ENST00000610726.5	1
ENSG00000009307.17	ENST00000689732.1	0.690862
ENSG00000009307.17	ENST00000693467.1	0.767068
ENSG00000009307.17	ENST00000686235.1	0.760659
ENSG00000009307.17	ENST00000684913.1	0.612142
ENSG00000009307.17	ENST00000686025.1	0.556203
ENSG00000009307.17	ENST00000687759.1	0.974456
ENSG00000009307.17	ENST00000692672.1	0.91928
ENSG00000009307.17	ENST00000529046.6	0.51373
ENSG00000009307.17	ENST00000689885.1	0.488003
ENSG00000009307.17	ENST00000686667.1	1
ENSG00000009307.17	ENST00000261443.9	1
ENSG00000009307.17	ENST00000369530.5	1
ENSG00000052723.12	ENST00000060969.6	0.511145
ENSG00000134198.10	ENST00000369516.7	0.838181
ENSG00000134259.6	ENST00000675637.2	1
ENSG00000173218.15	ENST00000355485.7	0.333333
ENSG00000173218.15	ENST00000369510.8	0.443457
ENSG00000173218.15	ENST00000369509.1	1
ENSG00000163393.13	ENST00000369503.9	0.899713
ENSG00000173212.5	ENST00000684484.1	0.919349
ENSG00000173212.5	ENST00000369500.4	0.733603
ENSG00000173212.5	ENST00000683341.1	0.935748
ENSG00000163399.16	ENST00000295598.10	0.837137
ENSG00000163399.16	ENST00000537345.5	1
ENSG00000163399.16	ENST00000369496.8	0.524778
ENSG00000116815.16	ENST00000369489.10	0.642988
ENSG00000116815.16	ENST00000369487.3	0.828426
ENSG00000143061.18	ENST00000369486.8	0.979892
ENSG00000116824.5	ENST00000369478.4	1
ENSG00000134247.10	ENST00000393203.3	0.394707
ENSG00000116830.12	ENST00000369466.9	0.822211
ENSG00000134253.10	ENST00000369464.7	1
ENSG00000198162.12	ENST00000356554.7	0.191768
ENSG00000198162.12	ENST00000422329.1	1
ENSG00000183508.5	ENST00000369448.4	0.712413
ENSG00000196505.11	ENST00000369443.10	0.494821
ENSG00000196505.11	ENST00000369442.3	0.483355
ENSG00000065183.16	ENST00000349139.6	0.413053
ENSG00000092607.15	ENST00000449873.5	0.784523
ENSG00000116874.12	ENST00000235521.5	0.433345
ENSG00000116882.15	ENST00000325945.4	0.991435
ENSG00000116882.15	ENST00000361035.8	1
ENSG00000203857.10	ENST00000369413.8	1
ENSG00000203857.10	ENST00000528909.1	1
ENSG00000143067.5	ENST00000421812.3	0.391092
ENSG00000092621.13	ENST00000641597.1	1
ENSG00000092621.13	ENST00000641115.1	1
ENSG00000092621.13	ENST00000369409.9	1
ENSG00000092621.13	ENST00000641023.2	0.630093
ENSG00000092621.13	ENST00000641811.1	1
ENSG00000134240.12	ENST00000369406.8	1
ENSG00000134240.12	ENST00000544913.2	0.996277
ENSG00000134193.15	ENST00000256585.10	1
ENSG00000134250.21	ENST00000256646.7	0.402106
ENSG00000265808.4	ENST00000578049.4	0.447125
ENSG00000265808.4	ENST00000618538.1	0.515509
ENSG00000286106.2	ENST00000624419.2	1
ENSG00000198019.13	ENST00000369384.9	1
ENSG00000171943.12	ENST00000367123.8	0.640798
ENSG00000273213.4	ENST00000609879.2	1
ENSG00000266338.7	ENST00000488031.6	0.580795
ENSG00000266338.7	ENST00000581897.7	0.591091
ENSG00000196369.12	ENST00000641863.3	0.754263
ENSG00000215784.6	ENST00000400889.3	1
ENSG00000162825.17	ENST00000369373.9	0.996635
ENSG00000117262.19	ENST00000313835.14	0.585163
ENSG00000174827.14	ENST00000451928.6	0.912829
ENSG00000174827.14	ENST00000417171.6	0.799718
ENSG00000265491.5	ENST00000582693.5	0.483203
ENSG00000186141.9	ENST00000334163.4	0.701226
ENSG00000186364.12	ENST00000334513.6	0.956647
ENSG00000131788.16	ENST00000369298.5	1
ENSG00000131788.16	ENST00000393046.3	1
ENSG00000198483.13	ENST00000544626.2	1
ENSG00000143127.13	ENST00000369304.8	1
ENSG00000143127.13	ENST00000539363.2	1
ENSG00000131779.11	ENST00000428634.1	0.794484
ENSG00000131779.11	ENST00000369306.8	0.7285
ENSG00000265241.8	ENST00000691760.1	1
ENSG00000265241.8	ENST00000583313.7	0.761361
ENSG00000265241.8	ENST00000632555.1	1
ENSG00000265241.8	ENST00000369307.4	0.638292
ENSG00000271601.4	ENST00000604000.4	0.368053
ENSG00000121851.13	ENST00000369314.2	0.167314
ENSG00000265972.6	ENST00000582401.6	0.621864
ENSG00000168509.20	ENST00000475797.1	1
ENSG00000168509.20	ENST00000336751.11	1
ENSG00000168509.20	ENST00000357836.5	1
ENSG00000168509.20	ENST00000636675.1	1
ENSG00000271425.9	ENST00000583866.9	0.362687
ENSG00000271425.9	ENST00000617010.2	1
ENSG00000264343.7	ENST00000579793.6	1
ENSG00000264343.7	ENST00000362074.7	0.771048
ENSG00000264343.7	ENST00000687833.1	0.855896
ENSG00000264343.7	ENST00000689750.1	1
ENSG00000264343.7	ENST00000692119.1	0.950307
ENSG00000268043.8	ENST00000617931.4	1
ENSG00000268043.8	ENST00000611443.4	1
ENSG00000131791.8	ENST00000254101.4	0.571724
ENSG00000131781.13	ENST00000441068.6	0.962891
ENSG00000131781.13	ENST00000369272.7	0.868442
ENSG00000131781.13	ENST00000254090.9	0.766692
ENSG00000131778.20	ENST00000652587.1	0.760198
ENSG00000131778.20	ENST00000369258.8	0.778098
ENSG00000131778.20	ENST00000369259.4	0.657653
ENSG00000116128.12	ENST00000684121.1	0.754888
ENSG00000162836.12	ENST00000609196.5	1
ENSG00000162836.12	ENST00000583509.7	1
ENSG00000188092.15	ENST00000314163.12	0.857606
ENSG00000263956.8	ENST00000614015.4	0.785344
ENSG00000263956.8	ENST00000682118.1	0.476818
ENSG00000236334.3	ENST00000419275.3	0.901481
ENSG00000270629.7	ENST00000614999.4	0.40761
ENSG00000270629.7	ENST00000619423.4	0.999927
ENSG00000286019.1	ENST00000593495.3	0.808675
ENSG00000177144.8	ENST00000322209.5	0.602338
ENSG00000178104.20	ENST00000695794.1	1
ENSG00000178104.20	ENST00000695769.1	1
ENSG00000178104.20	ENST00000369354.7	1
ENSG00000178104.20	ENST00000369347.8	1
ENSG00000178104.20	ENST00000369351.7	1
ENSG00000178104.20	ENST00000479408.6	0.652135
ENSG00000178104.20	ENST00000313431.13	0.609198
ENSG00000178104.20	ENST00000529945.2	0.564083
ENSG00000269713.8	ENST00000615421.4	0.908297
ENSG00000269713.8	ENST00000621074.5	0.705972
ENSG00000269713.8	ENST00000613595.4	1
ENSG00000269713.8	ENST00000584027.9	1
ENSG00000269713.8	ENST00000621645.4	0.579202
ENSG00000286219.2	ENST00000650865.2	0.613942
ENSG00000286219.2	ENST00000578189.1	1
ENSG00000286185.1	ENST00000621744.4	0.166667
ENSG00000271383.8	ENST00000651566.2	0.999663
ENSG00000288825.1	ENST00000369159.3	0.750551
ENSG00000288859.1	ENST00000607355.3	1
ENSG00000184678.11	ENST00000369155.4	0.589136
ENSG00000184260.6	ENST00000331380.4	0.509375
ENSG00000178096.9	ENST00000369152.6	0.543911
ENSG00000178096.9	ENST00000369150.1	1
ENSG00000159164.10	ENST00000369146.8	0.946283
ENSG00000159164.10	ENST00000369145.1	0.715559
ENSG00000143368.10	ENST00000271628.9	0.719776
ENSG00000014914.21	ENST00000369140.7	0.722213
ENSG00000264522.6	ENST00000581312.6	0.76986
ENSG00000136631.15	ENST00000643970.1	1
ENSG00000136631.15	ENST00000611412.4	0.955961
ENSG00000136631.15	ENST00000644510.2	0.678992
ENSG00000136631.15	ENST00000643611.1	1
ENSG00000136631.15	ENST00000644526.1	1
ENSG00000023902.14	ENST00000369126.5	0.529091
ENSG00000023902.14	ENST00000369124.5	0.809753
ENSG00000143401.15	ENST00000583931.6	0.607754
ENSG00000143401.15	ENST00000629042.2	0.810035
ENSG00000143401.15	ENST00000616917.4	0.768516
ENSG00000118298.12	ENST00000647854.1	0.682962
ENSG00000117362.13	ENST00000414276.6	1
ENSG00000117362.13	ENST00000369109.8	1
ENSG00000117362.13	ENST00000360244.8	0.448352
ENSG00000118292.9	ENST00000369102.5	0.861107
ENSG00000118292.9	ENST00000369098.3	1
ENSG00000118292.9	ENST00000369099.8	1
ENSG00000159208.16	ENST00000369094.5	1
ENSG00000266472.6	ENST00000614145.5	0.495904
ENSG00000266472.6	ENST00000581066.2	0.81418
ENSG00000117360.13	ENST00000324862.7	0.62301
ENSG00000163125.16	ENST00000401000.8	0.598955
ENSG00000143374.18	ENST00000369064.8	0.879304
ENSG00000143374.18	ENST00000606933.5	1
ENSG00000143369.15	ENST00000369049.8	0.545319
ENSG00000143369.15	ENST00000369047.9	1
ENSG00000143382.16	ENST00000369041.9	1
ENSG00000143382.16	ENST00000674043.1	1
ENSG00000143382.16	ENST00000674058.1	1
ENSG00000143382.16	ENST00000369038.6	0.848099
ENSG00000143384.14	ENST00000678610.1	1
ENSG00000143384.14	ENST00000620947.4	0.663199
ENSG00000143384.14	ENST00000369026.3	0.658876
ENSG00000143420.19	ENST00000369014.10	0.409736
ENSG00000143420.19	ENST00000271690.12	0.798708
ENSG00000143420.19	ENST00000356527.9	0.981315
ENSG00000143420.19	ENST00000362052.7	0.883418
ENSG00000143457.11	ENST00000271732.8	0.68241
ENSG00000163131.12	ENST00000679898.1	1
ENSG00000163131.12	ENST00000680664.1	0.505201
ENSG00000163131.12	ENST00000679512.1	1
ENSG00000163131.12	ENST00000368985.8	1
ENSG00000163131.12	ENST00000680311.1	1
ENSG00000163131.12	ENST00000679582.1	1
ENSG00000143387.14	ENST00000679260.1	0.670459
ENSG00000143437.21	ENST00000358595.10	0.541937
ENSG00000143437.21	ENST00000354396.6	1
ENSG00000143437.21	ENST00000515192.5	1
ENSG00000143437.21	ENST00000505755.5	1
ENSG00000143379.13	ENST00000692314.1	0.619762
ENSG00000143379.13	ENST00000368962.6	1
ENSG00000143379.13	ENST00000692827.1	1
ENSG00000143379.13	ENST00000368969.8	1
ENSG00000143418.20	ENST00000560793.6	0.547135
ENSG00000143418.20	ENST00000368954.10	0.894031
ENSG00000143412.10	ENST00000368947.9	0.386
ENSG00000143409.17	ENST00000312210.9	1
ENSG00000143409.17	ENST00000683666.2	1
ENSG00000143409.17	ENST00000361738.12	0.869119
ENSG00000143363.17	ENST00000368936.5	0.926658
ENSG00000143363.17	ENST00000368934.1	0.7827
ENSG00000163141.20	ENST00000368931.8	0.83748
ENSG00000143443.10	ENST00000368926.6	0.373231
ENSG00000197622.13	ENST00000357235.6	0.710469
ENSG00000213190.4	ENST00000368921.5	0.997209
ENSG00000143458.12	ENST00000368918.8	1
ENSG00000143458.12	ENST00000368916.1	1
ENSG00000143434.17	ENST00000368912.7	0.792196
ENSG00000163154.6	ENST00000368910.4	1
ENSG00000163156.12	ENST00000602841.5	0.717424
ENSG00000163156.12	ENST00000368902.1	1
ENSG00000163156.12	ENST00000368905.9	1
ENSG00000163155.12	ENST00000368908.10	0.4116
ENSG00000163159.15	ENST00000354473.4	0.665736
ENSG00000143398.20	ENST00000368890.8	0.589118
ENSG00000159352.16	ENST00000368884.8	0.699767
ENSG00000159352.16	ENST00000445776.1	1
ENSG00000159352.16	ENST00000453615.1	0.858588
ENSG00000143373.18	ENST00000336715.11	1
ENSG00000143373.18	ENST00000426871.1	0.814967
ENSG00000143393.17	ENST00000368873.6	0.310707
ENSG00000143393.17	ENST00000529142.5	0.925985
ENSG00000143393.17	ENST00000368872.5	1
ENSG00000143390.18	ENST00000452671.7	0.444954
ENSG00000143416.21	ENST00000368868.10	0.908186
ENSG00000143416.21	ENST00000447402.7	1
ENSG00000143416.21	ENST00000426705.6	0.781213
ENSG00000159377.11	ENST00000290541.7	0.757471
ENSG00000143442.22	ENST00000368863.6	0.527
ENSG00000143442.22	ENST00000491586.5	1
ENSG00000143442.22	ENST00000450842.1	1
ENSG00000143375.15	ENST00000271636.12	0.828568
ENSG00000143367.17	ENST00000392712.7	0.832322
ENSG00000143376.14	ENST00000458013.7	0.826549
ENSG00000143436.11	ENST00000368830.8	0.607261
ENSG00000143450.19	ENST00000635322.1	1
ENSG00000143450.19	ENST00000321531.10	1
ENSG00000143450.19	ENST00000479764.7	1
ENSG00000143450.19	ENST00000582415.2	0.523482
ENSG00000182134.17	ENST00000368825.7	0.909733
ENSG00000182134.17	ENST00000368823.5	1
ENSG00000143365.19	ENST00000318247.7	0.812484
ENSG00000159445.13	ENST00000368814.8	0.634295
ENSG00000159445.13	ENST00000489410.1	0.378184
ENSG00000197747.9	ENST00000368811.8	0.9323
ENSG00000197747.9	ENST00000368809.1	0.943765
ENSG00000163191.6	ENST00000271638.3	0.93344
ENSG00000163220.11	ENST00000368738.4	0.695716
ENSG00000163221.9	ENST00000368737.5	1
ENSG00000143546.10	ENST00000368733.4	1
ENSG00000197956.10	ENST00000368719.9	0.885051
ENSG00000197956.10	ENST00000496817.5	0.785949
ENSG00000197956.10	ENST00000368720.6	1
ENSG00000196154.12	ENST00000368716.9	0.327729
ENSG00000188015.10	ENST00000368713.8	0.638674
ENSG00000196754.13	ENST00000368708.9	1
ENSG00000196754.13	ENST00000368710.6	1
ENSG00000188643.11	ENST00000368704.5	0.440837
ENSG00000188643.11	ENST00000368706.9	0.909666
ENSG00000189334.9	ENST00000476873.5	0.649066
ENSG00000189171.15	ENST00000440685.7	0.708458
ENSG00000189171.15	ENST00000476133.6	0.639392
ENSG00000189171.15	ENST00000392623.5	1
ENSG00000160678.12	ENST00000368696.3	1
ENSG00000160678.12	ENST00000292169.6	0.991859
ENSG00000160679.13	ENST00000368694.8	0.548622
ENSG00000160679.13	ENST00000403433.5	1
ENSG00000160679.13	ENST00000368687.1	1
ENSG00000143553.11	ENST00000368685.6	0.799947
ENSG00000143621.17	ENST00000361891.9	0.657018
ENSG00000143624.14	ENST00000318967.7	0.85274
ENSG00000143554.14	ENST00000624995.4	0.546351
ENSG00000143554.14	ENST00000458027.5	0.722008
ENSG00000143614.10	ENST00000368655.5	0.683883
ENSG00000198837.10	ENST00000361217.9	0.845829
ENSG00000160741.17	ENST00000368630.7	0.960813
ENSG00000160741.17	ENST00000368633.2	1
ENSG00000143570.19	ENST00000621013.4	0.85375
ENSG00000143570.19	ENST00000537590.5	1
ENSG00000143570.19	ENST00000617697.4	0.428696
ENSG00000143570.19	ENST00000368623.7	1
ENSG00000143570.19	ENST00000356205.9	0.675293
ENSG00000143578.16	ENST00000368603.5	1
ENSG00000143578.16	ENST00000368600.7	0.240798
ENSG00000143543.15	ENST00000271843.9	0.413546
ENSG00000143543.15	ENST00000368589.5	0.634856
ENSG00000143545.10	ENST00000368575.5	0.485941
ENSG00000177954.14	ENST00000651669.1	0.465917
ENSG00000143549.21	ENST00000611659.4	1
ENSG00000143549.21	ENST00000368533.8	0.884374
ENSG00000143549.21	ENST00000330188.13	0.74913
ENSG00000143549.21	ENST00000368531.6	0.859954
ENSG00000143549.21	ENST00000368530.7	1
ENSG00000143612.21	ENST00000368521.10	0.744051
ENSG00000143612.21	ENST00000362076.8	0.585886
ENSG00000143612.21	ENST00000350592.7	0.742235
ENSG00000143612.21	ENST00000368518.5	0.863212
ENSG00000143612.21	ENST00000368516.1	1
ENSG00000143569.19	ENST00000343815.10	0.75043
ENSG00000143569.19	ENST00000271877.11	1
ENSG00000143569.19	ENST00000428931.6	0.592179
ENSG00000143569.19	ENST00000361546.6	0.373344
ENSG00000143569.19	ENST00000433615.5	0.9351
ENSG00000143575.15	ENST00000328703.12	0.690522
ENSG00000143595.13	ENST00000324978.8	1
ENSG00000143515.20	ENST00000368487.7	1
ENSG00000143515.20	ENST00000672630.1	0.677207
ENSG00000143515.20	ENST00000696573.1	1
ENSG00000160712.13	ENST00000368485.8	0.376113
ENSG00000169291.10	ENST00000304760.3	0.501639
ENSG00000160714.10	ENST00000292211.5	0.62849
ENSG00000160710.18	ENST00000679899.1	0.781499
ENSG00000160710.18	ENST00000680270.1	0.486638
ENSG00000160710.18	ENST00000681056.1	0.246027
ENSG00000160710.18	ENST00000368474.9	0.526052
ENSG00000160710.18	ENST00000680305.1	0.799543
ENSG00000160710.18	ENST00000648231.2	0.781297
ENSG00000160710.18	ENST00000368471.8	0.419086
ENSG00000160710.18	ENST00000649022.2	0.33902
ENSG00000160710.18	ENST00000649042.1	1
ENSG00000143603.19	ENST00000271915.9	1
ENSG00000143603.19	ENST00000618040.4	1
ENSG00000143603.19	ENST00000358505.2	1
ENSG00000163344.6	ENST00000368467.4	0.254557
ENSG00000163346.17	ENST00000368465.5	0.674844
ENSG00000163346.17	ENST00000368463.8	1
ENSG00000163348.4	ENST00000368457.3	0.645215
ENSG00000160691.19	ENST00000368445.9	1
ENSG00000160691.19	ENST00000368449.8	0.883566
ENSG00000160691.19	ENST00000448116.7	1
ENSG00000160691.19	ENST00000368450.5	0.532515
ENSG00000160691.19	ENST00000368453.8	1
ENSG00000173207.13	ENST00000368439.5	0.681244
ENSG00000173207.13	ENST00000308987.6	0.884588
ENSG00000160688.19	ENST00000292180.8	0.582509
ENSG00000160688.19	ENST00000368433.5	1
ENSG00000160688.19	ENST00000315144.14	0.671972
ENSG00000160688.19	ENST00000368432.5	1
ENSG00000160688.19	ENST00000368431.7	0.972965
ENSG00000160688.19	ENST00000368428.1	1
ENSG00000160685.14	ENST00000417934.6	1
ENSG00000160685.14	ENST00000368426.3	0.792862
ENSG00000160685.14	ENST00000535420.6	1
ENSG00000160685.14	ENST00000292176.2	1
ENSG00000143537.14	ENST00000355956.6	1
ENSG00000143537.14	ENST00000359280.8	0.918445
ENSG00000143537.14	ENST00000271836.10	0.707607
ENSG00000143537.14	ENST00000368413.5	1
ENSG00000143537.14	ENST00000356955.7	0.234775
ENSG00000143537.14	ENST00000447332.3	0.664299
ENSG00000243364.8	ENST00000368409.8	0.640897
ENSG00000243364.8	ENST00000427683.2	0.626881
ENSG00000143590.14	ENST00000368408.4	0.696676
ENSG00000169242.12	ENST00000368406.2	0.795057
ENSG00000169242.12	ENST00000368407.8	1
ENSG00000169241.19	ENST00000368401.6	0.865029
ENSG00000169241.19	ENST00000622581.4	0.865911
ENSG00000169241.19	ENST00000303343.12	1
ENSG00000169241.19	ENST00000368404.9	0.881951
ENSG00000179085.8	ENST00000368400.5	0.0724805
ENSG00000163463.13	ENST00000497317.5	0.719233
ENSG00000163463.13	ENST00000295682.6	0.824511
ENSG00000163463.13	ENST00000491084.5	0.792452
ENSG00000163462.19	ENST00000545012.5	1
ENSG00000163462.19	ENST00000543729.5	1
ENSG00000169231.13	ENST00000457183.6	1
ENSG00000173171.15	ENST00000316721.8	1
ENSG00000173171.15	ENST00000609421.1	0.547111
ENSG00000177628.16	ENST00000368373.8	0.790181
ENSG00000177628.16	ENST00000327247.9	1
ENSG00000177628.16	ENST00000427500.7	0.58069
ENSG00000177628.16	ENST00000428024.3	1
ENSG00000160767.22	ENST00000350210.6	0.466253
ENSG00000160767.22	ENST00000361361.7	0.810514
ENSG00000160767.22	ENST00000368368.7	1
ENSG00000116521.11	ENST00000302631.8	1
ENSG00000116521.11	ENST00000355379.3	0.703923
ENSG00000176444.19	ENST00000361168.9	1
ENSG00000143630.10	ENST00000368358.4	0.361072
ENSG00000143627.19	ENST00000342741.6	0.910868
ENSG00000160752.15	ENST00000611010.4	1
ENSG00000160752.15	ENST00000368356.9	0.77183
ENSG00000160752.15	ENST00000467076.5	0.624809
ENSG00000160752.15	ENST00000356657.10	1
ENSG00000160752.15	ENST00000612683.1	0.673551
ENSG00000160753.17	ENST00000368347.8	0.889771
ENSG00000160753.17	ENST00000368349.8	1
[truncated: 28,558 more rows]

## Sheet: Genes
Table S4. The tau-index values calculated for liver tissue, Huh7 and HepG2 cells. Mean TPM values for each biosample were used for tau-index calculation. The TPM values of splice variants were merged.
ENSG	Tau-index
ENSG00000000003.15	0.382147
ENSG00000000005.6	1
ENSG00000000419.14	0.441462
ENSG00000000457.14	0.51016
ENSG00000000460.17	0.502574
ENSG00000000971.17	0.972329
ENSG00000001036.14	0.454685
ENSG00000001084.13	0.212795
ENSG00000001167.15	0.637058
ENSG00000001460.18	0.720275
ENSG00000001461.17	0.887738
ENSG00000001497.18	0.499842
ENSG00000001561.7	0.880544
ENSG00000001617.12	0.886023
ENSG00000001626.17	0.676114
ENSG00000001629.10	0.532011
ENSG00000001630.18	0.564611
ENSG00000001631.17	0.655181
ENSG00000002016.18	0.858988
ENSG00000002330.14	0.282688
ENSG00000002549.13	0.51584
ENSG00000002586.20	0.411334
ENSG00000002586.20_PAR_Y	0.733498
ENSG00000002587.10	1
ENSG00000002726.21	1
ENSG00000002746.15	1
ENSG00000002822.16	0.414074
ENSG00000002834.18	0.599859
ENSG00000002919.15	0.32054
ENSG00000002933.9	0.98051
ENSG00000003056.8	0.706683
ENSG00000003096.14	0.850066
ENSG00000003137.9	1
ENSG00000003147.19	0.881073
ENSG00000003249.15	0.738871
ENSG00000003393.16	0.681719
ENSG00000003400.16	0.504938
ENSG00000003402.21	0.553545
ENSG00000003436.16	0.930732
ENSG00000003509.16	0.602547
ENSG00000003756.17	0.499791
ENSG00000003987.14	0.459347
ENSG00000003989.18	0.545098
ENSG00000004059.11	0.425524
ENSG00000004139.14	0.999989
ENSG00000004142.12	0.54172
ENSG00000004399.13	0.804994
ENSG00000004455.18	0.36208
ENSG00000004468.13	0.947662
ENSG00000004478.8	0.382378
ENSG00000004487.18	0.769689
ENSG00000004534.15	0.880993
ENSG00000004660.15	1
ENSG00000004700.16	0.659939
ENSG00000004766.17	1
ENSG00000004776.13	0.890708
ENSG00000004777.19	1
ENSG00000004779.10	0.616858
ENSG00000004799.8	0.995616
ENSG00000004809.14	1
ENSG00000004864.14	0.147601
ENSG00000004866.22	0.446277
ENSG00000004897.12	0.489292
ENSG00000004939.16	1
ENSG00000004961.15	0.776807
ENSG00000004975.12	0.526039
ENSG00000005001.10	1
ENSG00000005007.13	1
ENSG00000005020.13	0.656631
ENSG00000005022.6	0.452552
ENSG00000005059.16	0.900224
ENSG00000005073.6	1
ENSG00000005075.16	0.469605
ENSG00000005100.13	0.543506
ENSG00000005108.17	1
ENSG00000005156.12	0.59289
ENSG00000005175.10	0.812464
ENSG00000005187.12	0.656941
ENSG00000005189.20	0.757954
ENSG00000005194.15	0.569058
ENSG00000005206.17	0.514286
ENSG00000005238.20	0.733522
ENSG00000005243.10	0.88472
ENSG00000005249.13	1
ENSG00000005302.19	0.564671
ENSG00000005339.15	0.379075
ENSG00000005421.9	0.976042
ENSG00000005436.14	0.538
ENSG00000005448.17	1
ENSG00000005469.12	0.295443
ENSG00000005471.19	0.936619
ENSG00000005483.22	0.467946
ENSG00000005486.17	0.48209
ENSG00000005513.10	1
ENSG00000005700.15	0.907543
ENSG00000005801.18	0.553386
ENSG00000005810.20	0.461363
ENSG00000005812.11	0.650802
ENSG00000005844.19	0.812707
ENSG00000005882.12	0.473156
ENSG00000005889.16	0.415771
ENSG00000005893.16	0.196485
ENSG00000005961.19	1
ENSG00000005981.13	0.452697
ENSG00000006007.12	0.752758
ENSG00000006015.18	0.815274
ENSG00000006016.12	0.996076
ENSG00000006025.12	0.70576
ENSG00000006042.12	0.711779
ENSG00000006047.13	1
ENSG00000006062.18	1
ENSG00000006118.15	0.909535
ENSG00000006125.18	0.660286
ENSG00000006194.10	0.560129
ENSG00000006210.7	0.799722
ENSG00000006282.21	0.674916
ENSG00000006283.18	1
ENSG00000006327.14	0.587088
ENSG00000006377.11	0.61476
ENSG00000006432.16	0.895628
ENSG00000006451.8	0.568065
ENSG00000006453.14	0.636152
ENSG00000006459.11	0.745532
ENSG00000006468.14	0.808612
ENSG00000006530.18	0.425908
ENSG00000006534.17	0.883067
ENSG00000006555.11	0.911387
ENSG00000006576.17	0.892856
ENSG00000006607.14	0.390153
ENSG00000006611.17	1
ENSG00000006625.18	0.806495
ENSG00000006638.13	0.807883
ENSG00000006652.15	0.774138
ENSG00000006695.12	0.477283
ENSG00000006704.11	0.712523
ENSG00000006712.15	0.647008
ENSG00000006715.16	0.349422
ENSG00000006744.19	0.590215
ENSG00000006747.15	1
ENSG00000006756.16	0.548208
ENSG00000006757.12	0.461247
ENSG00000006831.10	0.357371
ENSG00000006837.12	0.349479
ENSG00000007001.13	1
ENSG00000007047.16	0.801999
ENSG00000007062.12	0.975145
ENSG00000007080.11	0.620906
ENSG00000007168.14	0.506293
ENSG00000007202.15	0.611229
ENSG00000007216.16	1
ENSG00000007237.19	1
ENSG00000007255.10	0.635681
ENSG00000007264.15	1
ENSG00000007341.19	0.824462
ENSG00000007372.25	1
ENSG00000007376.8	0.475019
ENSG00000007384.15	0.400602
ENSG00000007392.17	0.493785
ENSG00000007516.14	0.190871
ENSG00000007520.4	0.485798
ENSG00000007541.17	0.857958
ENSG00000007545.16	0.628496
ENSG00000007866.22	1
ENSG00000007908.16	1
ENSG00000007923.17	0.771703
ENSG00000007933.13	1
ENSG00000007944.15	0.701873
ENSG00000007952.18	0.912315
ENSG00000007968.7	0.653669
ENSG00000008018.9	0.523621
ENSG00000008056.14	1
ENSG00000008083.14	0.813095
ENSG00000008086.13	0.895658
ENSG00000008128.23	0.384005
ENSG00000008130.15	0.356242
ENSG00000008256.16	0.654193
ENSG00000008277.15	0.820362
ENSG00000008282.9	0.673182
ENSG00000008283.16	0.586585
ENSG00000008294.22	0.370253
ENSG00000008300.17	1
ENSG00000008311.16	0.799745
ENSG00000008323.16	0.547698
ENSG00000008324.12	0.666225
ENSG00000008382.16	0.495758
ENSG00000008394.13	0.352478
ENSG00000008405.12	0.740159
ENSG00000008441.19	0.469692
ENSG00000008513.16	0.598701
ENSG00000008516.18	1
ENSG00000008517.19	0.379949
ENSG00000008710.20	0.907429
ENSG00000008838.21	0.990189
ENSG00000008853.18	0.769845
ENSG00000008869.12	0.484032
ENSG00000008952.17	0.382128
ENSG00000008988.11	0.416354
ENSG00000009307.17	0.44155
ENSG00000009335.18	0.519906
ENSG00000009413.16	0.543651
ENSG00000009694.13	1
ENSG00000009724.17	0.980256
ENSG00000009765.15	1
ENSG00000009780.16	0.760255
ENSG00000009830.13	0.813161
ENSG00000009844.16	0.533286
ENSG00000009950.16	0.782616
ENSG00000009954.11	0.503845
ENSG00000010017.13	0.613103
ENSG00000010030.14	1
ENSG00000010072.16	0.800973
ENSG00000010165.20	0.5076
ENSG00000010219.14	0.582986
ENSG00000010244.19	0.435709
ENSG00000010256.11	0.693357
ENSG00000010270.14	0.641818
ENSG00000010278.15	0.763845
ENSG00000010292.13	0.752583
ENSG00000010295.20	0.605128
ENSG00000010310.9	0.695936
ENSG00000010318.22	0.686888
ENSG00000010319.7	0.9766
ENSG00000010322.16	0.687863
ENSG00000010327.10	1
ENSG00000010361.14	1
ENSG00000010379.16	0.884807
ENSG00000010404.18	0.602798
ENSG00000010438.17	0.949826
ENSG00000010539.12	0.541652
ENSG00000010610.10	0.98689
ENSG00000010626.15	0.769463
ENSG00000010704.19	0.314284
ENSG00000010803.17	0.611416
ENSG00000010810.17	0.432577
ENSG00000010818.10	0.458914
ENSG00000011009.11	0.649075
ENSG00000011021.23	0.727794
ENSG00000011028.14	1
ENSG00000011052.21	0.57547
ENSG00000011105.14	0.0424617
ENSG00000011114.15	0.331432
ENSG00000011132.12	0.472885
ENSG00000011143.19	1
ENSG00000011198.10	0.805583
ENSG00000011201.12	0.538657
ENSG00000011243.19	0.489358
ENSG00000011258.16	0.0237667
ENSG00000011260.14	0.580924
ENSG00000011275.19	0.542186
ENSG00000011295.16	0.484825
ENSG00000011304.22	0.692028
ENSG00000011332.22	1
ENSG00000011347.10	0.830237
ENSG00000011376.12	0.450887
ENSG00000011405.14	0.573251
ENSG00000011422.12	0.694313
ENSG00000011426.11	0.747101
ENSG00000011451.21	0.443392
ENSG00000011454.18	0.632526
ENSG00000011465.18	0.991003
ENSG00000011478.13	0.64798
ENSG00000011485.15	0.53998
ENSG00000011523.14	0.550966
ENSG00000011566.15	0.660135
ENSG00000011600.12	1
ENSG00000011638.11	0.743092
ENSG00000012048.23	0.662948
ENSG00000012061.16	0.283008
ENSG00000012124.17	1
ENSG00000012171.20	0.957341
ENSG00000012174.12	0.635589
ENSG00000012211.13	0.561945
ENSG00000012223.13	1
ENSG00000012232.10	0.515189
ENSG00000012504.15	0.531532
ENSG00000012660.14	0.413768
ENSG00000012779.12	1
ENSG00000012817.16	0.763957
ENSG00000012822.16	0.217234
ENSG00000012963.15	0.34786
ENSG00000012983.12	0.492931
ENSG00000013016.16	1
ENSG00000013275.8	0.707551
ENSG00000013288.9	0.447472
ENSG00000013297.12	1
ENSG00000013306.16	0.682771
ENSG00000013364.19	0.404934
ENSG00000013374.17	0.671907
ENSG00000013375.16	0.529364
ENSG00000013392.8	0.432019
ENSG00000013441.17	0.58633
ENSG00000013503.10	0.502976
ENSG00000013523.11	0.751034
ENSG00000013561.18	0.666966
ENSG00000013563.14	0.539897
ENSG00000013573.17	0.762905
ENSG00000013583.10	0.155656
ENSG00000013588.9	1
ENSG00000013619.15	1
ENSG00000013810.21	0.877406
ENSG00000014123.10	0.442563
ENSG00000014138.9	0.898024
ENSG00000014164.7	0.476459
ENSG00000014216.16	0.753625
ENSG00000014641.21	0.421202
ENSG00000014824.14	0.607392
ENSG00000014914.21	0.722213
ENSG00000014919.13	0.332651
ENSG00000015133.20	0.241519
ENSG00000015153.15	0.310456
ENSG00000015171.20	0.589168
ENSG00000015285.11	1
ENSG00000015413.10	0.981905
ENSG00000015475.19	0.675256
ENSG00000015479.20	0.586717
ENSG00000015520.15	0.326569
ENSG00000015568.13	0.466543
ENSG00000015676.18	0.777205
ENSG00000016391.11	0.737799
ENSG00000016402.14	1
ENSG00000016864.19	0.794332
ENSG00000017260.20	0.729412
ENSG00000017427.17	1
ENSG00000017483.16	0.992931
ENSG00000017797.13	0.668223
ENSG00000018189.13	0.226809
ENSG00000018236.15	1
ENSG00000018280.17	0.403481
ENSG00000018408.15	0.656776
ENSG00000018510.18	0.732131
ENSG00000018610.15	0.684099
ENSG00000018625.15	1
ENSG00000018699.13	0.654206
ENSG00000018869.18	0.83648
ENSG00000019102.12	0.621145
ENSG00000019144.20	0.840859
ENSG00000019169.11	1
ENSG00000019186.10	1
ENSG00000019485.14	0.770121
ENSG00000019549.13	1
ENSG00000019582.17	0.564878
ENSG00000019991.18	1
ENSG00000019995.6	0.206288
ENSG00000020129.16	0.561416
ENSG00000020181.18	1
ENSG00000020256.20	0.563918
ENSG00000020426.11	0.448298
ENSG00000020577.14	0.250762
ENSG00000020633.19	0.629581
ENSG00000020922.13	0.663501
ENSG00000021300.14	0.994579
ENSG00000021355.13	0.786177
ENSG00000021461.18	1
ENSG00000021488.13	0.448776
ENSG00000021574.13	0.498046
ENSG00000021645.20	1
ENSG00000021762.20	1
ENSG00000021776.11	0.666517
ENSG00000021826.18	0.994315
ENSG00000021852.14	0.988466
ENSG00000022267.19	1
ENSG00000022277.13	0.47567
ENSG00000022567.10	0.974325
ENSG00000022840.17	0.674307
ENSG00000022976.16	0.368415
ENSG00000023041.12	0.490555
ENSG00000023171.20	1
ENSG00000023191.17	0.387913
ENSG00000023228.14	0.433136
ENSG00000023287.13	0.624486
ENSG00000023318.9	0.485553
ENSG00000023330.15	0.365485
ENSG00000023445.16	0.223751
ENSG00000023516.9	0.241052
ENSG00000023572.10	0.564062
ENSG00000023608.5	0.712442
ENSG00000023697.13	0.695099
ENSG00000023734.11	0.801865
ENSG00000023839.12	0.691247
ENSG00000023892.11	0.664883
ENSG00000023902.14	0.755727
ENSG00000023909.10	0.596147
ENSG00000024048.11	0.576291
ENSG00000024422.12	0.923622
ENSG00000024526.17	0.876848
ENSG00000024862.18	0.120985
ENSG00000025039.15	0.92046
ENSG00000025156.13	0.463997
ENSG00000025293.17	0.517621
ENSG00000025423.11	0.998474
ENSG00000025434.19	0.58282
ENSG00000025708.14	0.73291
ENSG00000025770.19	0.818902
ENSG00000025772.8	0.665996
ENSG00000025796.14	0.644222
ENSG00000025800.14	0.479665
ENSG00000026025.16	0.967674
ENSG00000026103.24	0.504263
ENSG00000026297.17	0.803477
ENSG00000026508.21	0.944937
ENSG00000026652.15	1
ENSG00000026751.17	1
ENSG00000026950.17	0.412174
ENSG00000027001.10	0.453211
ENSG00000027075.17	0.537147
ENSG00000027697.16	0.465352
ENSG00000027847.14	0.468639
ENSG00000027869.12	0.426358
ENSG00000028116.18	0.735809
ENSG00000028203.19	0.526976
ENSG00000028277.22	0.931666
ENSG00000028310.18	0.521586
ENSG00000028528.15	0.485472
ENSG00000028839.10	0.552505
ENSG00000029153.15	0.643309
ENSG00000029363.17	0.486794
ENSG00000029364.12	0.611816
ENSG00000029534.21	1
ENSG00000029639.11	0.855698
ENSG00000029725.17	0.578606
ENSG00000029993.15	0.628754
ENSG00000030066.14	0.414056
ENSG00000030110.14	0.480901
ENSG00000030419.17	0.981657
ENSG00000030582.18	0.333061
ENSG00000031003.11	0.475532
ENSG00000031081.11	1
ENSG00000031691.7	0.618291
ENSG00000031698.13	0.708103
ENSG00000031823.14	0.64574
ENSG00000032219.19	0.237566
ENSG00000032389.13	0.738242
ENSG00000032444.17	0.411293
ENSG00000032742.18	0.681789
ENSG00000033011.14	0.455139
ENSG00000033030.15	0.817765
ENSG00000033050.9	0.709777
ENSG00000033100.17	0.533705
ENSG00000033122.21	1
ENSG00000033170.17	0.624453
ENSG00000033178.13	0.481901
ENSG00000033327.13	0.709642
ENSG00000033627.17	0.762358
ENSG00000033800.14	0.535817
ENSG00000033867.17	0.848382
ENSG00000034053.15	1
ENSG00000034152.19	0.682626
ENSG00000034510.6	0.808647
ENSG00000034533.12	0.478129
ENSG00000034677.13	0.229924
ENSG00000034693.15	0.447152
ENSG00000034713.8	0.458712
ENSG00000035115.22	0.449025
ENSG00000035141.8	0.44699
ENSG00000035403.18	0.814943
ENSG00000035499.13	0.637703
ENSG00000035664.11	0.512033
ENSG00000035681.9	0.80641
ENSG00000035687.10	0.76601
ENSG00000035862.12	0.422303
ENSG00000035928.17	0.377039
ENSG00000036054.13	0.862735
ENSG00000036257.14	0.550375
ENSG00000036473.8	0.994172
ENSG00000036530.9	1
ENSG00000036549.13	1
ENSG00000036672.16	0.59586
ENSG00000036828.17	1
ENSG00000037042.9	0.802958
ENSG00000037241.7	0.47784
ENSG00000037280.16	1
ENSG00000037474.15	0.377072
ENSG00000037637.11	0.697303
ENSG00000037749.13	0.500991
ENSG00000037757.14	0.49186
ENSG00000037897.17	0.683684
ENSG00000037965.6	1
ENSG00000038002.9	0.496586
ENSG00000038210.14	0.696061
ENSG00000038219.13	0.581112
ENSG00000038274.18	0.609249
ENSG00000038358.15	1
ENSG00000038382.21	0.726668
ENSG00000038427.16	0.958618
ENSG00000038532.16	0.338429
ENSG00000038945.15	0.673565
ENSG00000039068.20	0.43115
ENSG00000039123.16	0.707677
ENSG00000039139.11	0.686275
ENSG00000039319.17	0.814214
ENSG00000039523.20	1
ENSG00000039537.15	0.997187
ENSG00000039560.14	0.84598
ENSG00000039650.12	0.925559
ENSG00000040199.18	0.624923
ENSG00000040275.17	0.801385
ENSG00000040341.18	0.595966
ENSG00000040487.13	0.812198
ENSG00000040531.16	0.53966
ENSG00000040608.14	0.923238
ENSG00000040633.13	0.496883
ENSG00000040933.16	0.494558
ENSG00000041353.10	0.951817
ENSG00000041357.16	0.766759
ENSG00000041515.16	0.638262
ENSG00000041802.11	0.62775
ENSG00000041880.15	0.601088
ENSG00000041982.16	1
ENSG00000041988.16	0.437227
ENSG00000042062.13	1
ENSG00000042088.14	0.645811
ENSG00000042286.15	0.794529
ENSG00000042317.17	0.793206
ENSG00000042429.12	1
ENSG00000042445.14	0.583012
ENSG00000042493.16	0.949301
ENSG00000042753.12	0.624098
ENSG00000042781.14	0.999999
ENSG00000042832.12	1
ENSG00000042980.13	1
ENSG00000043093.15	0.677388
ENSG00000043143.22	0.595154
ENSG00000043355.12	0.778327
ENSG00000043514.17	0.716392
ENSG00000044012.4	1
ENSG00000044090.13	0.544986
ENSG00000044115.21	0.492411
ENSG00000044446.12	0.566849
ENSG00000044459.15	0.582024
ENSG00000044524.11	1
ENSG00000044574.9	0.770471
ENSG00000046604.14	0.688886
ENSG00000046647.14	0.669669
ENSG00000046651.16	0.898071
ENSG00000046653.15	0.612929
ENSG00000046889.19	1
ENSG00000047056.17	0.694411
ENSG00000047188.16	0.205054
ENSG00000047230.15	0.772602
ENSG00000047249.18	0.767001
ENSG00000047315.17	0.789741
ENSG00000047346.13	0.212404
ENSG00000047365.13	1
ENSG00000047410.14	0.343095
ENSG00000047457.14	0.517088
ENSG00000047578.14	0.332906
ENSG00000047579.20	0.437388
ENSG00000047597.7	1
ENSG00000047621.12	0.788249
ENSG00000047634.15	0.877944
ENSG00000047644.20	0.663378
ENSG00000047648.23	1
ENSG00000047849.22	0.685609
ENSG00000047932.14	0.432019
ENSG00000048028.11	0.723963
ENSG00000048052.24	0.949991
ENSG00000048140.18	0.596095
ENSG00000048162.22	0.454488
ENSG00000048342.18	0.839544
ENSG00000048392.13	0.373978
ENSG00000048405.11	0.368704
ENSG00000048471.14	0.584537
ENSG00000048540.16	1
ENSG00000048544.6	0.321861
ENSG00000048649.14	0.522063
ENSG00000048707.15	0.587678
ENSG00000048740.19	1
ENSG00000048828.17	0.470696
ENSG00000048991.17	0.456816
ENSG00000049089.15	0.75289
ENSG00000049130.16	0.984792
ENSG00000049167.16	0.622778
ENSG00000049239.13	0.326263
ENSG00000049245.13	0.487619
ENSG00000049246.15	0.711466
ENSG00000049249.9	1
ENSG00000049283.19	1
ENSG00000049323.16	0.889471
ENSG00000049449.10	0.177426
ENSG00000049540.19	0.936114
ENSG00000049541.11	0.3885
ENSG00000049618.24	0.337685
ENSG00000049656.14	0.443188
ENSG00000049759.20	0.948003
ENSG00000049769.14	0.979965
ENSG00000049860.14	0.655871
ENSG00000049883.15	0.489293
ENSG00000050130.18	0.74777
ENSG00000050165.19	0.762637
ENSG00000050327.15	0.855584
ENSG00000050344.9	0.850816
ENSG00000050393.12	0.700719
ENSG00000050405.14	0.795617
ENSG00000050426.16	0.592365
ENSG00000050438.17	1
ENSG00000050555.19	0.936054
ENSG00000050748.18	0.648854
ENSG00000050820.17	0.636757
ENSG00000051009.11	0.849675
ENSG00000051108.15	0.601974
ENSG00000051128.19	0.728281
ENSG00000051180.17	0.769493
ENSG00000051341.15	0.8766
ENSG00000051382.9	0.80589
ENSG00000051523.12	0.589661
ENSG00000051596.10	0.774774
ENSG00000051620.11	0.463329
ENSG00000051825.15	0.9053
ENSG00000052126.15	0.853471
ENSG00000052344.16	0.805163
ENSG00000052723.12	0.511145
ENSG00000052749.14	1
ENSG00000052795.13	0.174084
ENSG00000052802.13	0.310486
ENSG00000052841.15	0.76284
ENSG00000053254.16	0.561291
ENSG00000053328.9	0.63885
ENSG00000053371.13	0.673522
ENSG00000053372.5	0.712418
ENSG00000053501.14	0.418747
ENSG00000053702.15	1
ENSG00000053747.17	0.784253
ENSG00000053770.12	0.663156
ENSG00000053900.11	0.768455
ENSG00000053918.18	1
ENSG00000054116.12	0.503703
ENSG00000054118.15	0.487983
ENSG00000054148.18	0.757661
ENSG00000054179.12	0.989763
ENSG00000054219.11	0.629908
ENSG00000054267.22	0.789767
ENSG00000054277.14	0.834062
ENSG00000054282.16	0.659095
ENSG00000054392.13	1
ENSG00000054523.20	0.393662
ENSG00000054598.9	0.62883
ENSG00000054611.14	0.516179
ENSG00000054654.20	0.592336
ENSG00000054690.14	1
ENSG00000054793.14	0.698141
ENSG00000054803.4	1
ENSG00000054965.11	0.284369
ENSG00000054967.13	0.655228
ENSG00000054983.17	0.929408
ENSG00000055044.11	0.472782
ENSG00000055070.17	0.516641
ENSG00000055130.18	0.583987
ENSG00000055147.19	0.447098
ENSG00000055163.20	0.629567
ENSG00000055208.19	0.542967
ENSG00000055211.14	0.48148
ENSG00000055332.19	0.555533
ENSG00000055483.20	1
ENSG00000055609.21	0.633247
ENSG00000055732.13	1
ENSG00000055917.16	0.270708
ENSG00000055950.17	0.484804
ENSG00000055955.17	1
ENSG00000055957.11	0.990038
ENSG00000056050.7	0.474723
ENSG00000056097.16	0.756818
ENSG00000056277.16	0.753421
ENSG00000056291.19	1
ENSG00000056558.11	1
ENSG00000056586.16	0.823353
ENSG00000056736.10	0.743176
ENSG00000056972.20	0.606046
ENSG00000056998.20	0.659983
ENSG00000057019.16	0.414355
ENSG00000057252.13	0.751586
ENSG00000057294.16	0.761629
ENSG00000057593.14	0.824974
ENSG00000057608.17	0.40258
ENSG00000057657.17	0.878182
ENSG00000057663.16	0.678962
ENSG00000057704.13	0.875896
ENSG00000057757.10	0.299556
ENSG00000057935.14	0.470933
ENSG00000058056.10	0.935458
ENSG00000058063.16	0.866364
ENSG00000058085.15	1
ENSG00000058091.17	0.71656
ENSG00000058262.10	0.605504
ENSG00000058272.19	0.764355
ENSG00000058335.16	0.818567
ENSG00000058404.20	1
ENSG00000058453.17	0.757599
ENSG00000058600.16	0.867656
ENSG00000058668.15	0.999997
ENSG00000058673.17	0.58952
ENSG00000058729.11	0.833772
ENSG00000058799.15	0.417853
ENSG00000058804.12	0.696734
ENSG00000058866.15	1
ENSG00000059122.17	0.557578
ENSG00000059145.19	0.89176
ENSG00000059377.18	1
ENSG00000059378.13	1
ENSG00000059573.9	0.54589
ENSG00000059588.10	0.724105
ENSG00000059691.12	0.728855
ENSG00000059728.11	0.587393
ENSG00000059758.8	0.730832
ENSG00000059769.20	0.530977
ENSG00000059804.16	0.975164
ENSG00000059915.17	1
ENSG00000060069.18	0.499591
ENSG00000060138.13	0.67685
ENSG00000060140.9	1
ENSG00000060237.19	0.665571
ENSG00000060339.14	0.506509
ENSG00000060491.17	0.724479
ENSG00000060558.4	1
ENSG00000060566.14	0.672882
ENSG00000060642.12	0.551389
ENSG00000060656.20	0.805804
ENSG00000060688.13	0.703122
ENSG00000060709.16	1
ENSG00000060749.16	0.601857
ENSG00000060762.19	0.200787
ENSG00000060971.19	0.214083
ENSG00000060982.15	0.721418
ENSG00000061273.18	0.905405
ENSG00000061656.11	0.368995
ENSG00000061676.15	0.633457
ENSG00000061794.13	0.613525
ENSG00000061918.14	1
ENSG00000061936.10	0.534685
ENSG00000061938.21	0.593865
ENSG00000061987.16	0.509302
ENSG00000062096.15	1
ENSG00000062194.16	0.354484
ENSG00000062282.15	0.794071
ENSG00000062370.17	0.810119
ENSG00000062485.19	0.865788
ENSG00000062524.16	0.759075
ENSG00000062582.14	0.573467
ENSG00000062598.18	0.443712
ENSG00000062650.20	0.584897
ENSG00000062716.13	0.46412
ENSG00000062725.10	0.583258
ENSG00000062822.16	0.580254
ENSG00000063046.18	0.492117
ENSG00000063127.16	0.973417
ENSG00000063169.12	1
ENSG00000063176.16	0.28752
ENSG00000063177.13	0.463948
ENSG00000063180.9	0.597765
ENSG00000063241.8	0.219031
ENSG00000063244.13	0.556166
ENSG00000063245.15	0.245285
ENSG00000063322.15	0.550546
ENSG00000063438.20	1
ENSG00000063587.15	0.426117
ENSG00000063601.17	0.639356
ENSG00000063660.9	0.524662
ENSG00000063761.16	0.53284
ENSG00000063854.13	0.367455
ENSG00000063978.16	0.75498
ENSG00000064012.24	0.669758
ENSG00000064042.18	0.936139
ENSG00000064102.15	0.540996
ENSG00000064115.11	0.333375
ENSG00000064195.7	1
ENSG00000064199.7	0.658724
ENSG00000064205.11	1
ENSG00000064225.13	0.0821412
ENSG00000064300.9	0.676713
ENSG00000064309.16	0.999986
ENSG00000064313.13	0.751831
ENSG00000064393.16	0.551776
ENSG00000064419.14	0.765609
ENSG00000064489.23	0.414797
ENSG00000064490.14	0.612695
ENSG00000064545.15	0.5082
ENSG00000064547.14	1
ENSG00000064601.21	0.68585
ENSG00000064607.17	0.657103
ENSG00000064651.14	0.913911
ENSG00000064652.11	0.640208
ENSG00000064655.19	1
ENSG00000064666.15	0.764587
ENSG00000064687.13	0.332612
ENSG00000064692.20	1
ENSG00000064703.13	0.725775
ENSG00000064726.10	0.494092
ENSG00000064763.12	0.631119
ENSG00000064787.14	0.710221
ENSG00000064932.16	0.498295
ENSG00000064933.19	0.583742
ENSG00000064961.19	0.393697
ENSG00000064989.13	0.572306
ENSG00000064995.19	0.617894
ENSG00000064999.15	0.413321
ENSG00000065000.19	0.627793
ENSG00000065029.15	0.391754
ENSG00000065054.14	0.6715
ENSG00000065057.9	0.641435
ENSG00000065060.18	0.578816
ENSG00000065135.12	0.603733
ENSG00000065150.21	0.681127
ENSG00000065154.12	0.448229
ENSG00000065183.16	0.413053
ENSG00000065243.20	0.408574
ENSG00000065268.11	0.646118
ENSG00000065308.5	0.640945
ENSG00000065320.9	0.794818
ENSG00000065325.13	1
ENSG00000065328.17	0.749035
ENSG00000065357.20	0.958977
ENSG00000065361.17	0.307257
ENSG00000065413.20	0.88537
ENSG00000065427.15	0.719018
ENSG00000065457.11	0.944498
ENSG00000065485.20	0.541545
ENSG00000065491.8	0.736306
ENSG00000065518.8	0.734856
ENSG00000065526.12	0.639534
ENSG00000065534.20	0.453389
ENSG00000065548.18	0.528937
ENSG00000065559.15	0.396353
ENSG00000065600.13	0.499017
ENSG00000065613.15	0.411315
ENSG00000065615.14	0.760443
ENSG00000065621.15	0.832057
ENSG00000065665.21	0.593667
ENSG00000065717.15	0.674712
ENSG00000065802.12	0.72676
ENSG00000065809.14	0.342039
ENSG00000065833.9	0.952687
ENSG00000065882.17	0.821404
ENSG00000065883.17	0.455649
ENSG00000065911.13	0.621313
ENSG00000065923.10	0.126127
ENSG00000065970.9	0.243813
ENSG00000065978.19	0.576925
ENSG00000065989.16	0.621932
ENSG00000066027.12	0.386169
ENSG00000066044.15	0.509129
ENSG00000066056.14	0.926618
ENSG00000066084.13	0.449591
ENSG00000066117.15	0.743326
ENSG00000066135.13	0.600831
ENSG00000066136.21	0.57862
ENSG00000066230.12	0.893887
ENSG00000066248.15	0.479575
ENSG00000066279.19	0.945266
ENSG00000066322.15	0.64204
ENSG00000066336.12	1
ENSG00000066379.15	0.490422
ENSG00000066422.6	0.663464
ENSG00000066427.25	0.896055
ENSG00000066455.13	0.560583
ENSG00000066468.24	0.984753
ENSG00000066557.6	0.630034
ENSG00000066583.12	0.203399
ENSG00000066629.18	0.932188
ENSG00000066651.20	0.523297
ENSG00000066654.14	0.566245
ENSG00000066697.15	0.710593
ENSG00000066739.12	0.562376
ENSG00000066777.9	0.426232
ENSG00000066813.14	0.969608
ENSG00000066827.16	0.752206
ENSG00000066855.16	0.525035
ENSG00000066926.13	0.401513
ENSG00000066933.16	0.410165
ENSG00000067048.17	0.83178
ENSG00000067057.18	0.925199
ENSG00000067064.13	0.63539
ENSG00000067066.17	0.295164
ENSG00000067082.15	0.373713
ENSG00000067113.17	0.30794
ENSG00000067141.17	0.643948
ENSG00000067167.8	0.64846
ENSG00000067177.15	0.766686
ENSG00000067182.8	0.518132
ENSG00000067191.16	0.73768
ENSG00000067208.16	0.344687
ENSG00000067221.14	0.0483043
ENSG00000067225.20	0.608993
ENSG00000067248.11	1
ENSG00000067334.14	0.902373
ENSG00000067365.15	1
ENSG00000067369.14	0.636477
ENSG00000067445.22	0.713823
ENSG00000067533.6	0.759801
ENSG00000067560.14	0.610936
ENSG00000067596.12	0.7416
ENSG00000067606.17	0.918713
ENSG00000067646.12	0.603312
ENSG00000067704.10	0.488519
ENSG00000067715.14	0.97432
ENSG00000067798.16	0.514424
ENSG00000067829.20	0.144786
ENSG00000067840.13	1
ENSG00000067900.8	0.71236
ENSG00000067955.15	1
ENSG00000067992.17	0.603482
ENSG00000068001.14	0.491674
ENSG00000068024.18	0.999999
ENSG00000068028.18	0.468858
ENSG00000068078.20	0.554003
ENSG00000068079.8	0.678062
ENSG00000068097.16	0.513873
ENSG00000068120.15	0.821709
ENSG00000068137.15	1
ENSG00000068305.18	0.392495
ENSG00000068308.15	0.506233
ENSG00000068354.16	0.862821
ENSG00000068366.21	0.702322
ENSG00000068383.19	0.603338
ENSG00000068394.11	0.787345
ENSG00000068400.13	0.826473
ENSG00000068438.15	0.561001
ENSG00000068489.13	0.773234
ENSG00000068615.20	1
ENSG00000068650.19	0.52402
ENSG00000068654.17	0.749204
ENSG00000068697.7	0.352975
ENSG00000068724.17	1
ENSG00000068745.15	0.657682
ENSG00000068784.13	0.589455
ENSG00000068796.19	0.746717
ENSG00000068831.19	0.625296
ENSG00000068878.15	0.768455
ENSG00000068885.15	0.656518
ENSG00000068903.21	0.499799
ENSG00000068912.15	0.516734
ENSG00000068971.14	0.608455
ENSG00000068985.5	1
ENSG00000069011.16	0.76153
ENSG00000069020.19	0.96808
ENSG00000069122.19	0.604377
ENSG00000069248.12	0.69593
ENSG00000069275.13	0.521666
ENSG00000069329.18	0.689306
ENSG00000069345.12	0.35696
ENSG00000069399.15	0.658644
ENSG00000069424.16	0.756486
ENSG00000069431.14	0.984649
ENSG00000069482.7	1
ENSG00000069493.15	0.78737
ENSG00000069509.6	0.709406
ENSG00000069535.14	0.606703
ENSG00000069667.16	0.876153
ENSG00000069696.7	1
ENSG00000069702.11	0.887532
ENSG00000069812.11	0.688136
ENSG00000069849.11	0.857257
ENSG00000069869.17	0.307511
ENSG00000069943.10	0.712446
ENSG00000069956.14	0.473779
ENSG00000069966.19	0.326346
ENSG00000069974.16	0.260134
ENSG00000069998.12	0.844429
ENSG00000070010.19	0.82466
ENSG00000070018.9	0.738679
ENSG00000070019.5	1
ENSG00000070047.13	0.621703
ENSG00000070061.16	0.892193
ENSG00000070081.18	0.441301
ENSG00000070087.15	0.576407
ENSG00000070159.14	0.19621
ENSG00000070214.16	0.748972
ENSG00000070269.14	1
ENSG00000070366.14	1
ENSG00000070367.16	0.684227
ENSG00000070371.16	0.807043
ENSG00000070404.10	0.863078
ENSG00000070413.20	0.514561
ENSG00000070423.18	0.512306
ENSG00000070444.15	0.49996
ENSG00000070476.15	0.932891
ENSG00000070495.15	0.719545
ENSG00000070501.12	0.487955
ENSG00000070526.15	1
ENSG00000070540.13	1
ENSG00000070610.14	0.522688
ENSG00000070614.15	0.499351
ENSG00000070669.17	0.721289
ENSG00000070718.12	0.731318
ENSG00000070729.14	1
ENSG00000070731.11	0.849325
ENSG00000070756.17	0.443262
ENSG00000070759.17	0.36057
ENSG00000070761.8	0.527923
ENSG00000070770.10	0.793252
ENSG00000070778.13	0.531683
ENSG00000070785.17	0.463569
ENSG00000070814.22	0.604611
ENSG00000070831.18	0.437983
ENSG00000070882.13	0.64569
ENSG00000070950.10	0.862801
ENSG00000070961.16	0.858908
ENSG00000071051.14	0.431528
ENSG00000071054.17	0.709774
ENSG00000071073.13	0.51722
ENSG00000071082.11	0.691632
ENSG00000071127.17	0.699419
ENSG00000071189.21	0.490213
ENSG00000071205.12	0.979741
ENSG00000071242.12	0.85747
ENSG00000071243.16	0.672313
ENSG00000071246.11	0.700416
ENSG00000071282.12	0.913205
ENSG00000071462.12	0.543373
ENSG00000071537.14	0.439052
ENSG00000071539.14	0.844252
ENSG00000071553.18	0.520169
ENSG00000071564.17	0.683581
ENSG00000071575.12	0.921241
ENSG00000071626.17	0.503529
ENSG00000071655.18	0.736096
ENSG00000071794.16	0.694878
ENSG00000071859.15	0.749258
ENSG00000071889.17	0.265123
ENSG00000071894.17	0.656057
ENSG00000071967.12	0.814384
ENSG00000071991.9	0.905769
ENSG00000071994.11	0.583622
ENSG00000072042.13	0.474685
ENSG00000072062.15	0.274179
ENSG00000072071.17	0.951703
ENSG00000072080.11	1
ENSG00000072110.16	0.767911
ENSG00000072121.17	0.389691
ENSG00000072133.11	1
ENSG00000072134.16	0.431391
ENSG00000072135.13	0.524086
ENSG00000072163.20	0.636739
ENSG00000072195.15	1
ENSG00000072201.14	0.822178
ENSG00000072210.19	0.322588
ENSG00000072274.13	0.798971
ENSG00000072310.18	0.29604
ENSG00000072315.4	1
ENSG00000072364.13	0.620866
ENSG00000072401.15	0.638281
ENSG00000072415.10	0.386767
ENSG00000072422.17	0.78638
ENSG00000072501.19	0.776288
ENSG00000072506.14	0.391248
ENSG00000072518.22	0.587977
ENSG00000072571.20	0.729138
ENSG00000072609.18	0.623149
ENSG00000072657.10	0.956723
ENSG00000072682.20	0.502576
ENSG00000072694.22	1
ENSG00000072736.19	0.553346
ENSG00000072756.17	0.804813
ENSG00000072778.20	0.370528
ENSG00000072786.13	0.766636
ENSG00000072803.18	0.586927
ENSG00000072818.12	1
ENSG00000072840.13	1
ENSG00000072849.11	0.346211
ENSG00000072858.11	1
ENSG00000072864.16	0.542225
ENSG00000072952.20	1
ENSG00000072954.7	0.511564
ENSG00000072958.9	0.546252
ENSG00000073008.15	0.762443
ENSG00000073050.12	0.715666
ENSG00000073060.17	0.254502
ENSG00000073067.14	1
ENSG00000073111.14	0.820615
ENSG00000073146.16	1
ENSG00000073150.14	0.475875
ENSG00000073169.15	0.410404
ENSG00000073331.18	0.849278
ENSG00000073350.14	0.50245
ENSG00000073417.15	0.519806
ENSG00000073464.13	0.691272
ENSG00000073536.18	0.491309
ENSG00000073578.18	0.353134
ENSG00000073584.20	0.280438
ENSG00000073605.19	0.839813
ENSG00000073614.13	0.613101
ENSG00000073711.11	0.918475
ENSG00000073712.15	0.191454
ENSG00000073734.10	1
ENSG00000073737.17	1
ENSG00000073754.6	1
ENSG00000073792.16	0.775645
ENSG00000073803.14	0.378383
ENSG00000073849.16	0.453149
ENSG00000073861.3	1
ENSG00000073910.23	0.465447
ENSG00000073921.18	0.386605
ENSG00000073969.18	0.389702
ENSG00000074054.20	0.513685
ENSG00000074071.15	0.521111
ENSG00000074181.9	0.611227
ENSG00000074201.9	0.45432
ENSG00000074211.14	0.964109
ENSG00000074219.14	0.662567
ENSG00000074266.22	0.72597
ENSG00000074276.11	0.712897
ENSG00000074319.13	0.419443
ENSG00000074356.17	0.651968
ENSG00000074370.18	0.544883
ENSG00000074410.14	1
ENSG00000074416.16	0.831173
ENSG00000074527.13	0.639685
ENSG00000074582.15	0.591249
ENSG00000074590.14	0.769588
ENSG00000074603.19	0.0944335
ENSG00000074621.14	0.618468
ENSG00000074657.14	1
ENSG00000074660.17	1
ENSG00000074695.6	0.352074
ENSG00000074696.13	0.590058
ENSG00000074706.14	1
ENSG00000074755.15	0.389044
ENSG00000074800.16	0.648739
ENSG00000074842.8	0.451645
ENSG00000074855.11	0.648758
ENSG00000074935.14	0.580727
ENSG00000074964.17	0.907601
ENSG00000074966.11	1
ENSG00000075089.10	0.68227
ENSG00000075131.10	0.969251
ENSG00000075142.14	0.9632
ENSG00000075151.24	0.367361
ENSG00000075188.9	0.694694
ENSG00000075213.11	0.980133
ENSG00000075218.19	0.71594
ENSG00000075223.14	0.945024
ENSG00000075234.17	0.397455
ENSG00000075239.14	0.595598
ENSG00000075240.17	0.933111
ENSG00000075275.18	0.921808
ENSG00000075292.19	0.71689
ENSG00000075303.13	0.453845
ENSG00000075336.12	0.437562
ENSG00000075391.18	0.78797
ENSG00000075399.14	0.472494
ENSG00000075407.19	0.341395
ENSG00000075413.19	0.59199
ENSG00000075415.15	0.601939
ENSG00000075420.13	0.548456
ENSG00000075426.12	0.544318
ENSG00000075429.9	1
ENSG00000075461.6	0.573543
ENSG00000075539.15	0.586158
ENSG00000075568.17	0.492278
ENSG00000075618.18	0.545768
ENSG00000075624.17	0.833726
ENSG00000075643.6	0.539428
ENSG00000075651.17	0.326059
ENSG00000075702.19	0.788983
ENSG00000075711.21	0.31698
ENSG00000075785.14	0.548182
ENSG00000075790.12	0.646077
ENSG00000075856.12	0.874332
ENSG00000075884.14	1
ENSG00000075914.13	0.668453
ENSG00000075945.13	0.398347
ENSG00000075975.17	0.49513
ENSG00000076003.5	0.920043
ENSG00000076043.11	0.422372
ENSG00000076053.12	0.41304
ENSG00000076067.13	0.569996
ENSG00000076108.12	0.659382
ENSG00000076242.16	0.598528
ENSG00000076248.11	0.597257
ENSG00000076258.10	1
ENSG00000076321.11	0.503131
ENSG00000076351.13	0.705405
ENSG00000076356.7	0.329115
ENSG00000076382.17	0.929536
ENSG00000076513.17	0.704423
ENSG00000076554.16	0.583142
ENSG00000076555.16	0.961611
ENSG00000076604.16	0.66536
ENSG00000076641.4	0.665894
ENSG00000076650.7	0.426518
ENSG00000076662.10	0.732284
ENSG00000076685.19	0.701496
ENSG00000076706.17	0.864203
ENSG00000076716.9	0.77306
ENSG00000076770.15	0.675807
ENSG00000076826.10	0.678936
ENSG00000076864.21	1
ENSG00000076924.12	0.403249
ENSG00000076928.18	0.535442
ENSG00000076944.17	0.754795
ENSG00000076984.18	0.624012
ENSG00000077009.14	1
ENSG00000077044.11	1
ENSG00000077063.11	1
ENSG00000077092.20	1
ENSG00000077097.16	0.847933
ENSG00000077147.16	0.402442
ENSG00000077150.20	0.404245
ENSG00000077152.11	0.884823
ENSG00000077157.22	0.654071
ENSG00000077232.19	0.596578
ENSG00000077235.18	0.768138
ENSG00000077238.14	0.356843
ENSG00000077254.14	0.421733
ENSG00000077264.16	1
ENSG00000077312.9	0.554626
ENSG00000077348.10	0.590277
ENSG00000077380.16	0.401913
ENSG00000077420.16	0.573989
ENSG00000077454.17	0.522816
ENSG00000077463.15	0.482872
ENSG00000077514.9	0.870345
ENSG00000077549.19	0.430898
ENSG00000077585.14	0.483507
ENSG00000077616.11	0.794458
ENSG00000077684.16	0.754548
ENSG00000077713.19	0.323637
ENSG00000077721.17	0.688752
ENSG00000077782.22	0.844427
ENSG00000077942.19	0.616831
ENSG00000077984.6	1
ENSG00000078018.21	0.814987
ENSG00000078043.16	0.608205
ENSG00000078061.14	0.252969
ENSG00000078070.14	1
ENSG00000078081.8	1
ENSG00000078114.19	1
ENSG00000078124.13	0.261778
ENSG00000078140.14	0.554461
ENSG00000078142.14	0.865004
ENSG00000078177.14	0.307878
ENSG00000078237.7	0.572738
ENSG00000078246.17	0.568362
ENSG00000078269.15	0.592213
ENSG00000078304.20	0.416591
ENSG00000078369.18	0.46094
ENSG00000078399.19	1
ENSG00000078401.7	0.907798
ENSG00000078403.17	0.59049
ENSG00000078487.18	0.56149
ENSG00000078589.13	1
ENSG00000078596.11	1
ENSG00000078618.23	0.493386
ENSG00000078668.14	0.592736
ENSG00000078674.19	0.376011
ENSG00000078687.18	0.413713
ENSG00000078699.22	0.533322
ENSG00000078725.13	1
ENSG00000078747.16	0.313041
ENSG00000078804.13	0.279838
ENSG00000078808.19	0.484799
ENSG00000078898.7	1
ENSG00000078900.15	1
ENSG00000078902.16	0.132126
ENSG00000078967.13	0.377675
ENSG00000079112.10	1
ENSG00000079134.13	0.624479
ENSG00000079150.19	0.89517
ENSG00000079156.17	0.821078
ENSG00000079215.15	1
ENSG00000079246.16	0.426694
ENSG00000079257.8	1
ENSG00000079263.19	0.722213
ENSG00000079277.22	0.662941
ENSG00000079308.20	0.676815
ENSG00000079313.15	0.441746
ENSG00000079332.15	0.444244
ENSG00000079335.20	0.90999
ENSG00000079337.16	1
ENSG00000079385.23	0.639038
ENSG00000079387.14	0.453199
ENSG00000079393.21	1
ENSG00000079432.9	0.567464
ENSG00000079435.10	1
ENSG00000079459.13	0.480058
ENSG00000079462.8	0.729327
ENSG00000079482.14	0.901358
ENSG00000079557.5	0.995854
ENSG00000079616.14	0.56194
ENSG00000079689.14	0.991038
ENSG00000079691.18	0.689236
ENSG00000079739.17	0.370426
ENSG00000079785.16	0.64971
ENSG00000079805.19	0.474562
ENSG00000079819.19	0.605894
ENSG00000079931.15	0.918085
ENSG00000079950.14	0.539105
ENSG00000079974.19	0.524752
ENSG00000079999.14	0.569914
ENSG00000080007.8	1
ENSG00000080031.10	0.805843
ENSG00000080189.15	0.445148
ENSG00000080200.10	0.999968
ENSG00000080224.18	1
ENSG00000080298.16	0.50604
ENSG00000080345.18	0.353004
ENSG00000080371.6	0.589944
ENSG00000080493.18	0.778776
ENSG00000080503.24	0.82334
ENSG00000080546.14	0.591045
ENSG00000080561.14	0.597254
ENSG00000080573.7	1
ENSG00000080603.17	0.71431
ENSG00000080608.10	0.798738
ENSG00000080618.17	0.906606
ENSG00000080709.16	1
ENSG00000080802.20	0.711539
ENSG00000080815.19	0.414829
ENSG00000080819.9	0.490282
ENSG00000080822.17	0.584193
ENSG00000080823.23	0.966285
ENSG00000080824.19	0.460749
ENSG00000080839.12	0.438428
ENSG00000080845.19	0.456825
ENSG00000080854.16	1
ENSG00000080910.13	1
ENSG00000080986.13	0.812084
ENSG00000081014.11	0.425759
ENSG00000081019.14	0.783917
ENSG00000081026.19	0.676818
ENSG00000081041.9	0.967386
ENSG00000081051.8	0.529352
ENSG00000081052.14	1
ENSG00000081059.20	0.774324
ENSG00000081087.15	0.59344
ENSG00000081148.12	1
ENSG00000081154.12	0.602723
ENSG00000081177.19	0.660979
ENSG00000081181.8	0.715979
ENSG00000081189.16	0.764538
ENSG00000081237.20	1
ENSG00000081307.15	0.698687
ENSG00000081320.11	0.865057
ENSG00000081377.17	0.837461
ENSG00000081386.13	0.547571
ENSG00000081479.15	0.999659
ENSG00000081665.14	0.911482
ENSG00000081692.13	0.721539
ENSG00000081721.12	0.568993
ENSG00000081760.17	0.872595
ENSG00000081791.9	0.321037
ENSG00000081803.17	0.603731
ENSG00000081818.4	1
ENSG00000081853.15	0.747517
ENSG00000081870.12	0.496285
ENSG00000081913.14	0.471021
ENSG00000081985.14	1
ENSG00000082014.17	0.990569
ENSG00000082068.9	0.599612
ENSG00000082074.19	1
ENSG00000082146.13	0.0923509
ENSG00000082153.18	0.526843
ENSG00000082175.16	1
ENSG00000082196.21	0.778326
ENSG00000082212.13	0.969286
ENSG00000082213.18	0.796601
ENSG00000082258.13	0.529942
ENSG00000082269.17	0.673594
ENSG00000082438.18	0.284572
ENSG00000082458.12	0.916038
ENSG00000082512.15	1
ENSG00000082515.18	0.678012
ENSG00000082516.9	0.734115
ENSG00000082641.16	0.578674
ENSG00000082701.17	0.629201
ENSG00000082781.12	0.636312
ENSG00000082805.21	0.802472
ENSG00000082898.19	0.446993
ENSG00000082996.20	0.160211
ENSG00000083067.24	1
ENSG00000083093.10	0.734294
ENSG00000083097.15	0.722539
ENSG00000083099.11	0.814926
ENSG00000083123.15	0.495629
ENSG00000083168.11	0.58911
ENSG00000083223.18	0.434969
ENSG00000083290.20	1
ENSG00000083312.19	0.554388
ENSG00000083444.17	0.826055
ENSG00000083454.22	1
ENSG00000083457.12	1
ENSG00000083520.15	0.57876
ENSG00000083535.16	0.748634
ENSG00000083544.16	0.239951
ENSG00000083635.8	0.562022
ENSG00000083642.19	0.819637
ENSG00000083720.13	0.562623
ENSG00000083750.13	0.819776
ENSG00000083782.8	1
ENSG00000083799.18	0.531416
ENSG00000083807.10	0.961656
ENSG00000083812.13	0.923245
ENSG00000083814.13	0.734095
ENSG00000083817.9	0.441413
ENSG00000083828.16	0.672249
ENSG00000083838.17	0.887675
ENSG00000083844.10	0.595966
ENSG00000083845.9	0.567874
ENSG00000083857.15	0.941918
ENSG00000083896.13	0.70545
ENSG00000083937.10	0.583489
ENSG00000084070.12	0.246748
ENSG00000084072.17	0.464422
ENSG00000084073.10	0.43182
ENSG00000084090.14	0.522671
ENSG00000084092.7	0.58923
ENSG00000084093.19	0.649282
ENSG00000084110.11	0.856903
ENSG00000084112.15	0.752382
ENSG00000084207.18	0.9982
ENSG00000084234.18	0.521491
ENSG00000084444.14	0.946054
ENSG00000084453.17	0.695539
ENSG00000084463.8	0.708569
ENSG00000084623.12	0.545661
ENSG00000084628.10	0.918968
ENSG00000084636.18	1
ENSG00000084652.16	0.403365
ENSG00000084674.15	0.373176
ENSG00000084676.16	0.483477
ENSG00000084693.16	0.831129
ENSG00000084710.14	1
ENSG00000084731.15	0.82891
ENSG00000084733.11	0.376731
ENSG00000084734.9	0.613378
ENSG00000084754.12	0.369533
ENSG00000084764.12	0.57304
ENSG00000084774.14	0.75547
ENSG00000085063.17	0.307363
ENSG00000085117.12	0.969492
ENSG00000085185.16	0.919425
ENSG00000085224.23	0.692016
ENSG00000085231.14	0.534522
ENSG00000085265.12	1
ENSG00000085274.16	0.820965
ENSG00000085276.19	0.951405
ENSG00000085365.18	0.569003
ENSG00000085377.15	0.790362
ENSG00000085382.12	0.964711
ENSG00000085415.16	0.678704
ENSG00000085433.17	0.885732
ENSG00000085449.15	0.412509
ENSG00000085465.13	0.409301
ENSG00000085491.17	1
ENSG00000085511.20	0.897645
ENSG00000085514.16	1
ENSG00000085563.15	0.771946
ENSG00000085644.14	0.792526
ENSG00000085662.14	0.699032
ENSG00000085719.13	0.42757
ENSG00000085721.13	0.575157
ENSG00000085733.16	0.592934
ENSG00000085741.14	0.704507
ENSG00000085760.15	0.557392
ENSG00000085788.14	0.777692
ENSG00000085831.16	0.868889
ENSG00000085832.17	0.374612
ENSG00000085840.13	0.776098
ENSG00000085871.9	0.35216
ENSG00000085872.15	0.424367
ENSG00000085978.22	0.593883
ENSG00000085982.15	0.370586
ENSG00000085998.15	0.557308
ENSG00000085999.13	0.867205
ENSG00000086015.23	0.501477
ENSG00000086061.16	0.379895
ENSG00000086062.13	0.199296
ENSG00000086065.14	0.549679
ENSG00000086102.19	0.459528
ENSG00000086189.11	0.799004
ENSG00000086200.17	0.784906
ENSG00000086205.18	0.590027
ENSG00000086232.13	0.363561
ENSG00000086289.12	0.88265
ENSG00000086300.16	0.277958
ENSG00000086475.15	0.410741
ENSG00000086504.18	0.782982
ENSG00000086506.3	0.908049
ENSG00000086544.3	0.708006
ENSG00000086548.9	1
ENSG00000086570.13	1
ENSG00000086589.12	0.427022
ENSG00000086598.11	0.350654
ENSG00000086619.15	0.837959
ENSG00000086666.19	0.443806
ENSG00000086696.11	0.567635
ENSG00000086712.13	0.665342
ENSG00000086758.16	0.69285
ENSG00000086827.9	0.790283
ENSG00000086848.15	0.510277
ENSG00000086967.10	1
ENSG00000086991.13	1
ENSG00000087008.16	0.448882
ENSG00000087053.20	0.604941
ENSG00000087074.8	0.826333
ENSG00000087076.9	0.666801
ENSG00000087077.14	0.915216
ENSG00000087085.16	0.68686
ENSG00000087086.15	0.486165
ENSG00000087087.20	0.524326
ENSG00000087088.21	0.51831
ENSG00000087095.13	0.370814
ENSG00000087116.16	0.730421
ENSG00000087152.16	0.760124
ENSG00000087157.19	0.760013
ENSG00000087191.13	0.613417
ENSG00000087206.17	0.668935
ENSG00000087237.12	0.706955
ENSG00000087245.13	1
ENSG00000087253.13	1
ENSG00000087258.16	1
ENSG00000087263.17	0.561304
ENSG00000087266.17	0.638315
ENSG00000087269.16	0.614262
ENSG00000087274.19	0.587539
ENSG00000087299.12	0.587529
ENSG00000087301.9	0.463185
ENSG00000087302.9	0.401812
ENSG00000087303.19	0.84538
ENSG00000087338.5	0.59389
ENSG00000087365.16	0.506149
ENSG00000087448.11	0.65006
ENSG00000087460.29	0.455387
ENSG00000087470.19	0.681191
ENSG00000087494.16	0.646118
ENSG00000087502.19	0.457954
ENSG00000087586.18	0.674307
ENSG00000087842.11	0.759807
ENSG00000087884.15	0.713258
ENSG00000087903.13	0.552896
ENSG00000087995.16	0.599056
ENSG00000088035.18	0.729277
ENSG00000088038.19	0.710439
ENSG00000088179.9	0.62286
ENSG00000088205.13	0.500109
ENSG00000088247.19	0.52981
ENSG00000088256.9	0.579256
ENSG00000088280.20	0.401466
ENSG00000088298.13	0.434435
ENSG00000088305.19	0.850819
ENSG00000088325.16	0.793182
ENSG00000088356.6	0.698308
ENSG00000088367.23	0.927484
ENSG00000088386.17	0.923517
ENSG00000088387.21	0.624145
ENSG00000088448.14	0.638108
ENSG00000088451.11	0.148031
ENSG00000088543.15	0.712183
ENSG00000088682.14	0.578988
ENSG00000088727.14	0.599159
ENSG00000088766.12	0.483107
ENSG00000088808.18	0.793704
ENSG00000088812.18	0.444168
ENSG00000088826.18	0.603944
ENSG00000088827.13	1
ENSG00000088832.18	0.704446
ENSG00000088833.18	0.711303
ENSG00000088836.14	0.684579
ENSG00000088854.13	0.541812
ENSG00000088876.13	0.79214
ENSG00000088881.21	1
ENSG00000088888.18	0.627793
ENSG00000088899.16	0.578469
ENSG00000088926.14	0.831804
ENSG00000088930.8	0.591344
ENSG00000088970.16	0.890665
ENSG00000088986.11	0.603448
ENSG00000088992.18	0.89136
ENSG00000089006.17	0.77411
ENSG00000089009.16	0.710861
ENSG00000089022.14	0.555914
ENSG00000089041.17	1
ENSG00000089048.15	0.517852
ENSG00000089050.16	0.451982
ENSG00000089053.13	0.483029
ENSG00000089057.15	0.661001
ENSG00000089060.12	0.580999
ENSG00000089063.15	0.352939
ENSG00000089091.16	1
ENSG00000089094.20	0.58686
ENSG00000089127.15	0.421489
ENSG00000089154.11	0.462734
ENSG00000089157.16	0.514491
ENSG00000089159.17	0.448861
ENSG00000089163.4	0.700339
ENSG00000089177.19	0.554046
ENSG00000089195.15	0.78321
ENSG00000089199.10	0.925658
ENSG00000089220.5	0.315017
ENSG00000089234.16	0.581077
ENSG00000089248.7	0.399131
ENSG00000089280.19	0.75269
ENSG00000089289.16	0.483414
ENSG00000089327.15	0.911239
ENSG00000089335.22	0.50251
ENSG00000089351.15	0.889449
ENSG00000089356.19	0.780962
ENSG00000089472.18	0.889153
ENSG00000089486.17	0.69849
ENSG00000089505.18	0.889028
ENSG00000089597.18	0.81685
ENSG00000089639.11	0.640282
ENSG00000089682.17	0.643311
ENSG00000089685.15	0.616148
ENSG00000089693.11	0.59527
ENSG00000089723.10	1
ENSG00000089737.18	0.432804
ENSG00000089775.12	0.322065
ENSG00000089818.18	0.462759
ENSG00000089820.16	1
ENSG00000089876.12	0.798108
ENSG00000089902.10	0.442513
ENSG00000089916.18	0.889266
ENSG00000090006.18	0.989752
ENSG00000090013.11	0.829405
ENSG00000090020.11	1
ENSG00000090054.16	0.403464
ENSG00000090060.19	0.38192
ENSG00000090061.17	0.551084
ENSG00000090097.22	0.600222
ENSG00000090104.12	1
ENSG00000090238.12	0.819647
ENSG00000090263.16	0.712915
ENSG00000090266.13	0.513749
ENSG00000090273.14	0.618173
ENSG00000090316.16	0.609279
ENSG00000090339.9	0.712117
ENSG00000090372.15	0.689693
ENSG00000090382.7	0.988078
ENSG00000090402.8	1
ENSG00000090432.7	0.65441
ENSG00000090447.12	0.959776
ENSG00000090470.15	0.486538
ENSG00000090487.11	0.541102
ENSG00000090520.12	0.50874
ENSG00000090530.10	0.965026
ENSG00000090534.20	0.603648
ENSG00000090539.15	0.493647
ENSG00000090554.13	0.711931
ENSG00000090565.17	0.825883
ENSG00000090581.11	0.306657
ENSG00000090612.22	0.798244
ENSG00000090615.16	0.747972
ENSG00000090621.15	0.486395
ENSG00000090661.12	0.774166
ENSG00000090674.16	0.826886
ENSG00000090686.16	0.415182
ENSG00000090776.6	0.834547
ENSG00000090857.14	0.626234
ENSG00000090861.17	0.55749
ENSG00000090863.12	0.536265
ENSG00000090889.12	0.80704
ENSG00000090905.19	0.7
ENSG00000090924.15	0.922093
ENSG00000090932.11	0.905082
ENSG00000090971.5	0.549405
ENSG00000090975.14	0.422984
ENSG00000090989.18	0.694458
ENSG00000091009.8	0.479751
ENSG00000091010.6	1
ENSG00000091039.17	0.688333
ENSG00000091073.20	0.879046
ENSG00000091106.19	1
ENSG00000091127.14	0.548676
ENSG00000091128.13	0.665702
ENSG00000091129.22	0.767309
ENSG00000091136.15	0.560359
ENSG00000091137.14	1
ENSG00000091138.13	0.833918
ENSG00000091140.15	0.466538
ENSG00000091157.15	0.516352
ENSG00000091164.13	0.476305
ENSG00000091262.17	0.849116
ENSG00000091317.8	0.607714
ENSG00000091409.16	0.520587
ENSG00000091428.18	0.968773
ENSG00000091436.17	0.724087
ENSG00000091483.8	0.166131
ENSG00000091490.11	0.943563
ENSG00000091513.16	0.68836
ENSG00000091527.17	0.647896
ENSG00000091536.20	1
ENSG00000091542.9	0.759168
ENSG00000091583.11	0.659976
ENSG00000091592.16	0.828032
ENSG00000091622.16	1
ENSG00000091640.8	0.304408
ENSG00000091651.9	0.751415
ENSG00000091656.19	0.792107
ENSG00000091704.10	1
ENSG00000091732.17	0.751805
ENSG00000091831.25	1
ENSG00000091879.14	0.538657
ENSG00000091947.10	0.750319
ENSG00000091972.18	1
ENSG00000091986.16	0.962368
ENSG00000092009.10	1
ENSG00000092010.15	0.701367
ENSG00000092020.11	0.612122
ENSG00000092036.19	0.418735
ENSG00000092051.18	1
ENSG00000092094.11	0.506408
ENSG00000092098.17	0.975741
ENSG00000092108.22	0.576494
ENSG00000092140.16	0.818534
ENSG00000092148.14	0.642273
ENSG00000092199.19	0.484222
ENSG00000092201.10	0.895926
ENSG00000092203.15	0.420567
ENSG00000092208.19	0.781854
ENSG00000092295.12	0.701241
ENSG00000092330.18	0.407649
ENSG00000092377.15	0.572272
ENSG00000092421.17	0.575213
ENSG00000092439.16	0.296097
ENSG00000092445.12	0.88115
ENSG00000092470.12	0.817379
ENSG00000092529.25	1
ENSG00000092531.10	0.593178
ENSG00000092607.15	0.784523
ENSG00000092621.13	0.613349
ENSG00000092758.18	1
ENSG00000092820.19	0.692236
ENSG00000092841.19	0.79472
ENSG00000092847.13	0.648849
ENSG00000092853.14	0.592539
ENSG00000092871.17	0.217392
ENSG00000092929.12	0.94434
ENSG00000092931.12	0.377012
ENSG00000092964.18	0.400033
ENSG00000092969.12	1
ENSG00000092978.11	0.695899
ENSG00000093000.19	0.563025
ENSG00000093009.11	0.848887
ENSG00000093010.15	0.490389
ENSG00000093072.19	1
ENSG00000093144.19	0.33909
ENSG00000093167.18	0.549947
ENSG00000093183.14	0.782519
ENSG00000093217.11	0.16087
ENSG00000094631.21	0.531532
ENSG00000094804.12	0.63835
ENSG00000094841.14	0.883216
ENSG00000094880.11	0.639857
ENSG00000094914.14	0.734096
ENSG00000094916.16	0.803976
ENSG00000094963.14	1
ENSG00000094975.14	0.824086
ENSG00000095002.15	0.667224
ENSG00000095015.6	0.760907
ENSG00000095059.17	0.627676
ENSG00000095066.12	0.586597
ENSG00000095139.15	0.648402
ENSG00000095203.15	0.177357
ENSG00000095209.12	0.513779
ENSG00000095261.14	0.748282
ENSG00000095303.17	1
ENSG00000095319.14	0.469807
ENSG00000095321.18	0.418988
ENSG00000095370.20	1
ENSG00000095380.11	0.596915
ENSG00000095383.20	0.796942
ENSG00000095397.16	0.53283
ENSG00000095485.18	1
ENSG00000095539.15	0.531912
ENSG00000095564.15	0.393009
ENSG00000095574.12	0.348621
ENSG00000095585.18	1
ENSG00000095596.12	1
ENSG00000095637.23	0.444449
ENSG00000095739.11	0.897714
ENSG00000095752.7	0.969196
ENSG00000095787.24	0.601665
ENSG00000095794.20	0.772953
ENSG00000095906.17	0.268664
ENSG00000095932.7	0.665697
ENSG00000095951.17	0.618203
ENSG00000096006.12	1
ENSG00000096060.15	0.684186
ENSG00000096063.16	0.538468
ENSG00000096070.19	1
ENSG00000096080.12	0.642549
ENSG00000096088.16	0.998704
ENSG00000096092.6	0.538187
ENSG00000096093.16	0.79439
ENSG00000096384.20	0.688481
ENSG00000096401.8	0.314386
ENSG00000096433.11	0.834995
ENSG00000096654.16	0.553193
ENSG00000096696.15	0.743958
ENSG00000096717.12	0.422702
ENSG00000096746.18	0.724734
ENSG00000096872.17	0.524578
ENSG00000096968.14	0.456574
ENSG00000097007.19	0.662098
ENSG00000097021.20	0.485399
ENSG00000097033.14	0.590981
ENSG00000097046.13	0.908004
ENSG00000097096.10	0.611296
ENSG00000099139.14	1
ENSG00000099194.6	0.50771
ENSG00000099203.7	0.490395
ENSG00000099204.21	0.429546
ENSG00000099219.15	0.963845
ENSG00000099246.18	0.399534
ENSG00000099250.18	0.624135
ENSG00000099256.19	0.994376
ENSG00000099260.12	0.494537
ENSG00000099282.10	0.923481
ENSG00000099284.15	0.791131
ENSG00000099290.17	0.474834
ENSG00000099308.11	0.562567
ENSG00000099326.9	0.630913
ENSG00000099330.9	0.799913
ENSG00000099331.14	0.806432
ENSG00000099337.5	0.799754
ENSG00000099341.12	0.68157
ENSG00000099364.18	0.607408
ENSG00000099365.11	0.833331
ENSG00000099377.14	0.282508
ENSG00000099381.19	0.633948
ENSG00000099385.12	0.471143
ENSG00000099399.6	1
ENSG00000099617.4	0.681782
ENSG00000099622.14	0.414717
ENSG00000099624.8	0.442774
ENSG00000099625.14	0.790676
ENSG00000099769.6	0.997777
ENSG00000099783.12	0.542619
ENSG00000099785.11	0.330027
ENSG00000099795.7	0.745243
ENSG00000099797.15	0.346871
ENSG00000099800.8	0.601004
ENSG00000099804.9	0.502067
ENSG00000099810.21	0.373271
ENSG00000099812.9	0.650006
ENSG00000099814.17	0.719107
ENSG00000099817.12	0.0931249
ENSG00000099821.14	0.584437
ENSG00000099822.3	0.911013
ENSG00000099834.19	0.930888
ENSG00000099840.14	1
ENSG00000099849.15	0.836505
ENSG00000099860.9	0.773241
ENSG00000099864.18	0.670239
ENSG00000099866.16	0.883193
ENSG00000099875.16	0.692288
ENSG00000099889.14	1
ENSG00000099899.15	0.372253
ENSG00000099901.17	0.566169
ENSG00000099904.16	0.647743
ENSG00000099910.17	0.541522
ENSG00000099917.17	0.679621
ENSG00000099937.11	0.486211
ENSG00000099940.12	0.575772
ENSG00000099942.13	0.427847
ENSG00000099949.21	0.843824
ENSG00000099953.10	1
ENSG00000099954.19	0.999995
ENSG00000099956.20	0.597126
ENSG00000099958.15	1
ENSG00000099960.13	1
ENSG00000099968.18	0.802759
ENSG00000099974.8	1
ENSG00000099977.15	0.485032
ENSG00000099991.18	0.51943
ENSG00000099992.16	0.541829
ENSG00000099994.11	0.681517
ENSG00000099995.19	0.604164
ENSG00000099998.19	0.791094
ENSG00000099999.15	0.640161
ENSG00000100003.18	0.979647
ENSG00000100014.20	0.50671
ENSG00000100023.20	0.553904
ENSG00000100024.15	1
ENSG00000100028.12	0.646247
ENSG00000100029.18	0.484856
ENSG00000100030.15	0.674525
ENSG00000100031.19	0.486024
ENSG00000100033.17	0.913486
ENSG00000100034.14	0.49787
ENSG00000100036.13	0.846365
ENSG00000100038.20	0.880715
ENSG00000100055.21	1
ENSG00000100056.12	0.548913
ENSG00000100060.18	0.643971
ENSG00000100065.15	0.994683
ENSG00000100075.10	0.412211
ENSG00000100077.16	0.81137
ENSG00000100079.7	0.547131
ENSG00000100083.19	0.501709
ENSG00000100084.14	0.496519
ENSG00000100092.24	0.647934
ENSG00000100097.12	0.688048
ENSG00000100099.21	0.54217
ENSG00000100100.13	0.596005
ENSG00000100104.13	0.646534
ENSG00000100105.18	0.781283
ENSG00000100106.22	0.599999
ENSG00000100109.17	0.472663
ENSG00000100116.17	0.302957
ENSG00000100121.14	1
ENSG00000100124.15	0.480019
ENSG00000100129.18	0.744162
ENSG00000100138.15	0.613377
ENSG00000100139.14	0.699282
ENSG00000100142.16	0.434386
ENSG00000100147.14	0.423257
ENSG00000100150.20	0.673553
ENSG00000100151.16	0.482354
ENSG00000100154.15	0.563701
ENSG00000100162.15	0.610447
ENSG00000100167.21	1
ENSG00000100170.10	1
ENSG00000100196.11	0.549049
ENSG00000100197.23	0.995938
ENSG00000100201.23	0.258403
ENSG00000100206.11	1
ENSG00000100207.21	0.450256
ENSG00000100209.11	0.680905
ENSG00000100211.12	0.60843
ENSG00000100216.6	0.493611
ENSG00000100219.17	0.44408
ENSG00000100220.12	0.485376
ENSG00000100221.11	0.72065
ENSG00000100225.18	0.320581
ENSG00000100226.16	0.34211
ENSG00000100227.19	0.523099
ENSG00000100228.14	1
ENSG00000100234.12	0.492056
ENSG00000100239.16	0.602828
ENSG00000100241.22	0.585067
ENSG00000100242.16	0.512009
ENSG00000100243.22	0.488562
ENSG00000100246.13	0.728804
ENSG00000100253.13	1
ENSG00000100258.18	0.429381
ENSG00000100263.14	0.791656
ENSG00000100266.19	0.442239
ENSG00000100271.17	1
ENSG00000100276.10	0.773896
ENSG00000100280.17	0.422657
ENSG00000100281.14	0.477322
ENSG00000100284.22	0.720611
ENSG00000100288.20	0.897651
ENSG00000100290.3	0.705456
ENSG00000100292.18	0.75633
ENSG00000100294.13	0.448133
ENSG00000100296.14	0.812843
ENSG00000100297.16	0.724385
ENSG00000100299.18	0.070131
ENSG00000100300.18	0.558645
ENSG00000100304.13	0.699475
ENSG00000100307.13	0.837314
ENSG00000100311.17	0.693741
ENSG00000100312.11	1
ENSG00000100314.4	1
ENSG00000100316.16	0.617888
ENSG00000100319.13	0.405949
ENSG00000100320.24	0.403892
ENSG00000100321.15	1
ENSG00000100324.14	0.478854
ENSG00000100325.15	0.74326
ENSG00000100330.16	0.467758
ENSG00000100335.15	0.539971
ENSG00000100336.18	1
ENSG00000100342.21	0.641463
ENSG00000100344.11	0.404511
ENSG00000100345.23	0.943244
ENSG00000100347.15	0.351642
ENSG00000100348.10	0.270244
ENSG00000100350.16	0.640936
ENSG00000100353.18	0.497608
ENSG00000100354.21	0.328293
ENSG00000100359.21	0.899643
ENSG00000100360.15	0.83108
ENSG00000100364.19	0.183761
ENSG00000100365.16	1
ENSG00000100372.15	0.792477
ENSG00000100373.10	0.957128
ENSG00000100376.12	0.632241
ENSG00000100379.18	0.723962
ENSG00000100380.15	0.349923
ENSG00000100385.14	1
ENSG00000100387.9	0.470053
ENSG00000100393.14	0.391634
ENSG00000100395.15	0.488926
ENSG00000100399.16	0.927279
ENSG00000100401.20	0.475554
ENSG00000100403.12	0.616121
ENSG00000100410.8	0.512576
ENSG00000100412.17	0.537829
ENSG00000100413.17	0.402824
ENSG00000100416.15	0.97513
ENSG00000100417.12	0.350699
ENSG00000100418.8	0.247662
ENSG00000100422.14	0.499877
ENSG00000100425.19	1
ENSG00000100426.7	0.670773
ENSG00000100427.16	1
[truncated: 12,429 more rows]
