# Supplementary material for: Comparison of Alternative Splicing Landscapes Revealed by Long-Read Sequencing in Hepatocyte-Derived HepG2 and Huh7 Cultured Cells and Human Liver Tissue
Source: Biology (Basel). 2023 Dec 6;12(12):1494. doi: 10.3390/biology12121494 (PMC10740679; doi:10.3390/biology12121494)
Supplement: Supplementary file 1 [file biology-12-01494-s001.zip › Table S5.xlsx]

## Sheet: Liver_tissue
Table S5. The list of randomly selected tissue-specific genes for liver tissue, and Huh7 and HepG2 cell lines. For each gene ensembl gene and transcript identifiers, gene names, UniProt proteoforms identifiers and proteoforms types are provided.
ENSG ID	Gene name	ENST ID	UniProt ID	Proteoform type
ENSG00000215644.10	GCGR	ENST00000400723.8	P47871	canonic
ENSG00000263761.3	GDF2	ENST00000581492.3	Q9UK05	canonic
ENSG00000184374.3	COLEC10	ENST00000332843.3	Q9Y6Z7	canonic
ENSG00000178695.6	KCTD12	ENST00000377474.4	Q96CX2	canonic
ENSG00000196616.14	ADH1B	ENST00000305046.13	P00325	canonic
ENSG00000168542.16	COL3A1	ENST00000304636.9	P02461	canonic
ENSG00000137077.8	CCL21	ENST00000259607.7	O00585	canonic
ENSG00000138286.15	FAM149B1	ENST00000445951.5	H0Y607	predicted
ENSG00000163736.4	PPBP	ENST00000296028.4	P02775	canonic
ENSG00000215375.7	MYL5	ENST00000511290.5	Q02045-2	Non-canonic

## Sheet: Huh7
Table S5. The list of randomly selected tissue-specific genes for liver tissue, and Huh7 and HepG2 cell lines. For each gene ensembl gene and transcript identifiers, gene names, UniProt proteoforms identifiers and proteoforms types are provided.
ENSG ID	Gene name	ENST ID	UniProt ID	Proteoform type
ENSG00000141449.16	GREB1L	ENST00000424526.7	Q9C091	canonic
ENSG00000142611.17	PRDM16	ENST00000270722.10	Q9HAZ2	canonic
ENSG00000123892.12	RAB38	ENST00000243662.11	P57729	canonic
ENSG00000152527.14	PLEKHH2	ENST00000282406.9	Q8IVE3	canonic
ENSG00000164236.12	ANKRD33B	ENST00000296657.7	A6NCL7	canonic
ENSG00000182963.11	GJC1	ENST00000587113.1	Q5H9P2	predicted
ENSG00000129680.16	MAP7D3	ENST00000316077.14	Q8IWC1	canonic
ENSG00000221978.13	CCNL2	ENST00000408918.8	Q96S94-5	non-canonic
ENSG00000107736.22	CDH23	ENST00000299366.11	Q8N5B3	predicted
ENSG00000167105.8	TMEM92	ENST00000507382.2	Q6UXU6	canonic

## Sheet: HepG2
Table S5. The list of randomly selected tissue-specific genes for liver tissue, and Huh7 and HepG2 cell lines. For each gene ensembl gene and transcript identifiers, gene names, UniProt proteoforms identifiers and proteoforms types are provided.
ENSG ID	Gene name	ENST ID	UniProt ID	Proteoform type
ENSG00000162591.16	MEGF6	ENST00000356575.9	O75095	canonic
ENSG00000151208.17	DLG5	ENST00000372391.7	Q8TDM6	canonic
ENSG00000136997.21	MYC	ENST00000524013.2	P01106-3	Non-canonic
ENSG00000146678.10	IGFBP1	ENST00000468955.1	C9J6H2	predicted
ENSG00000033100.17	CHPF2	ENST00000035307.7	Q9P2E5	canonic
ENSG00000125970.12	RALY	ENST00000375114.7	Q9UKM9-2	Non-canonic
ENSG00000136699.20	SMPD4	ENST00000680298.1	A0A7P0TB24	predicted
ENSG00000004660.15	CAMKK1	ENST00000381769.6	J3KPJ3	predicted
ENSG00000158296.14	SLC13A3	ENST00000279027.9	Q8WWT9	canonic
ENSG00000156860.16	FBRS	ENST00000356166.11	J3KNZ9	predicted
